# Supplementary material
Source: Royal Society of Chemistry journal article supplement (doi:10.1039/d6ob00546b)
Supplement: d6ob00546b1.pdf [file d6ob00546b1.pdf]

## Supporting Information

### Construction of P-stereogenic phosphine oxides via Lewis base-catalyzed enantioselective O-Boc protection

Yike Wang,<sup>†</sup> Xingkuan Chen,<sup>\*,‡</sup> and Jianfeng Xu<sup>\*,†</sup>

<sup>†</sup> School of Chemistry and Chemical Engineering, Zhejiang Sci-Tech University, Hangzhou 310018, China

<sup>‡</sup> College of Chemistry and Materials Science, Department of Chemistry, Jinan University, Guangzhou 510632, China

email: [jfxu@zstu.edu.cn](mailto:jfxu@zstu.edu.cn), [xkchen@jnu.edu.cn](mailto:xkchen@jnu.edu.cn)

#### Table of Contents

|    |                                                                      |     |
|----|----------------------------------------------------------------------|-----|
| I  | ▪ General information                                                | S1  |
|    | ▪ Optimization of reaction conditions                                | S2  |
|    | ▪ Preparation of catalyst <b>C6</b>                                  | S3  |
|    | ▪ General procedure for the catalytic synthesis of products <b>3</b> | S3  |
|    | ▪ Kinetic resolution of racemic <b>3a</b>                            | S4  |
|    | ▪ 1 mmol scale preparation of <b>3a</b>                              | S4  |
|    | ▪ Synthetic transformation of <b>3a</b>                              | S4  |
|    | ▪ Proposed reaction pathway                                          | S5  |
|    | ▪ References cited in the SI                                         | S6  |
|    | ▪ X-ray structure of product <b>3a</b>                               | S7  |
|    | ▪ Characterization of products                                       | S9  |
| II | <sup>1</sup> H, <sup>13</sup> C NMR and HPLC spectra                 | S20 |

## General Information

Commercially available materials were used as received. Proton nuclear magnetic resonance ( $^1\text{H}$  NMR) spectra were recorded on a Bruker AV 400 (400 MHz) spectrometer. Chemical shifts were recorded in parts per million (ppm,  $\delta$ ) relative to tetramethylsilane ( $\delta$  0.00) or chloroform ( $\delta$  = 7.26, singlet).  $^1\text{H}$  NMR splitting patterns are designated as singlet (s), doublet (d), triplet (t), quartet (q), dd (doublet of doublets); m (multiplets), and etc. All first-order splitting patterns were assigned on the basis of the appearance of the multiplet. Splitting patterns that could not be easily interpreted are designated as multiplet (m) or broad (br). Carbon nuclear magnetic resonance ( $^{13}\text{C}$  NMR) spectra were recorded on a Bruker AV 400 (101 MHz) spectrometer. High resolution mass spectral analysis (HRMS) was performed on Waters Xevo G2-S QToF mass spectrometer. The determination of ee was performed via chiral HPLC analysis using Waters Empower 3 HPLC system. X-ray crystallography analysis was performed on Bruker X8 APEX X-ray diffractionmeter. Analytical thin-layer chromatography (TLC) was carried out on with GF 254 silica gel coated plates. Flash column chromatography was carried out using 200–300 mesh silica gel. Melting points are uncorrected. Bisphenols **1**<sup>1</sup> and DMAP analogue **C6**<sup>2</sup> were synthesized according to reported methods.

### Optimization of reaction conditions:<sup>a</sup>

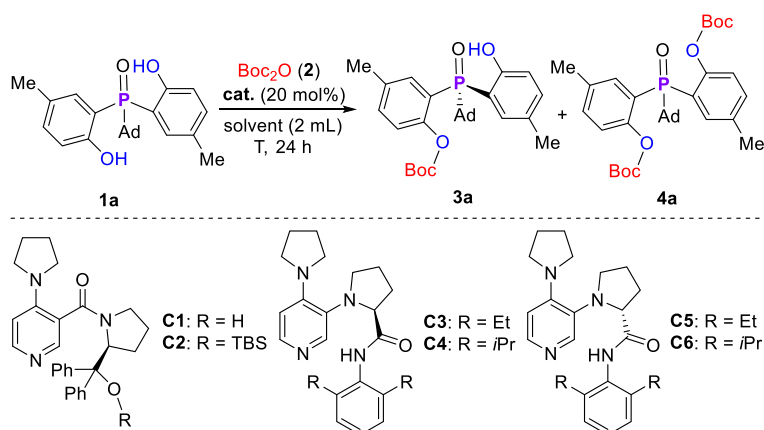

| Entry           | Cat.      | Solvent                             | T (°C)     | Yield of <b>3a</b> (%) <sup>b</sup> | Yield of <b>4a</b> (%) <sup>b</sup> | er of <b>3a</b> <sup>c</sup> |
|-----------------|-----------|-------------------------------------|------------|-------------------------------------|-------------------------------------|------------------------------|
| 1               | <b>C1</b> | CH <sub>2</sub> Cl <sub>2</sub>     | -20        | 68                                  | 30                                  | 37:63                        |
| 2               | <b>C2</b> | CH <sub>2</sub> Cl <sub>2</sub>     | -20        | 64                                  | 20                                  | 55.5:44.5                    |
| 3               | <b>C3</b> | CH <sub>2</sub> Cl <sub>2</sub>     | -20        | 63                                  | 34                                  | 10:90                        |
| 4               | <b>C4</b> | CH <sub>2</sub> Cl <sub>2</sub>     | -20        | 60                                  | 38                                  | 5:95                         |
| 5               | <b>C5</b> | CH <sub>2</sub> Cl <sub>2</sub>     | -20        | 59                                  | 38                                  | 92:8                         |
| <b>6</b>        | <b>C6</b> | <b>CH<sub>2</sub>Cl<sub>2</sub></b> | <b>-20</b> | <b>60</b>                           | <b>39</b>                           | <b>97.5:2.5</b>              |
| 7               | <b>C6</b> | CHCl <sub>3</sub>                   | -20        | 58                                  | 40                                  | 97:3                         |
| 8               | <b>C6</b> | toluene                             | -20        | 22                                  | 33                                  | 85:15                        |
| 9               | <b>C6</b> | THF                                 | -20        | 54                                  | 7                                   | 85.5:14.5                    |
| 10              | <b>C6</b> | EtOAc                               | -20        | 11                                  | 69                                  | 80:20                        |
| 11              | <b>C6</b> | CH <sub>2</sub> Cl <sub>2</sub>     | 0          | 51                                  | 49                                  | 93:7                         |
| 12              | <b>C6</b> | CH <sub>2</sub> Cl <sub>2</sub>     | -40        | 70                                  | 14                                  | 93.5:6.5                     |
| 13 <sup>d</sup> | <b>C6</b> | CH <sub>2</sub> Cl <sub>2</sub>     | -20        | 82                                  | 4                                   | 85:15                        |
| 14 <sup>e</sup> | <b>C6</b> | CH <sub>2</sub> Cl <sub>2</sub>     | -20        | 90                                  | 7                                   | 88.5:11.5                    |
| 15 <sup>f</sup> | <b>C6</b> | CH <sub>2</sub> Cl <sub>2</sub>     | -20        | 87                                  | 10                                  | 90:10                        |
| 16 <sup>g</sup> | <b>C6</b> | CH <sub>2</sub> Cl <sub>2</sub>     | -20        | 80                                  | 16                                  | 92:8                         |
| 17 <sup>h</sup> | <b>C6</b> | CH <sub>2</sub> Cl <sub>2</sub>     | -20        | 74                                  | 22                                  | 94:6                         |
| 18 <sup>i</sup> | <b>C6</b> | CH <sub>2</sub> Cl <sub>2</sub>     | -20        | 70                                  | 26                                  | 95:5                         |
| 19 <sup>j</sup> | <b>C6</b> | CH <sub>2</sub> Cl <sub>2</sub>     | -20        | 47                                  | 47                                  | 98.5:1.5                     |
| 20 <sup>k</sup> | <b>C6</b> | CH <sub>2</sub> Cl <sub>2</sub>     | -20        | 33                                  | 66                                  | 99:1                         |
| 21 <sup>d</sup> | <b>C6</b> | CH <sub>2</sub> Cl <sub>2</sub>     | -40        | 77                                  | 2                                   | 90:10                        |
| 22 <sup>e</sup> | <b>C6</b> | CH <sub>2</sub> Cl <sub>2</sub>     | -40        | 75                                  | 3                                   | 91.5:8.5                     |

<sup>a</sup> Reaction conditions unless otherwise specified: **1a** (0.2 mmol), **2** (0.3 mmol), **cat.** (0.04 mmol), solvent (2 mL) at -20 °C for 24 h. <sup>b</sup> Isolated yield based on **1a**. <sup>c</sup> Enantiomeric ratio of **3a**, determined *via* chiral-phase HPLC analysis. <sup>d</sup> 0.18 mmol of **2** was used. <sup>e</sup> 0.20 mmol of **2** was used. <sup>f</sup> 0.22 mmol of **2** was used. <sup>g</sup> 0.24 mmol of **2** was used. <sup>h</sup> 0.26 mmol of **2** was used. <sup>i</sup> 0.28 mmol of **2** was used. <sup>j</sup> 0.32 mmol of **2** was used. <sup>k</sup> 0.34 mmol of **2** was used. THF = Tetrahydrofuran.

### Preparation of catalyst C6:

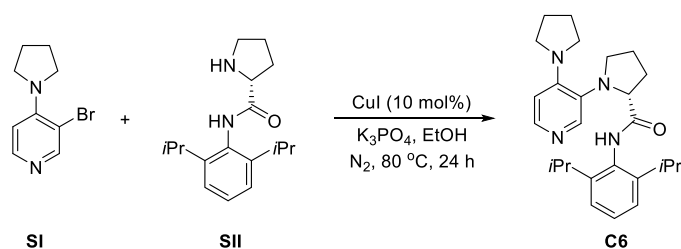

Following Xie's procedure<sup>2</sup>: To a dry 120 mL Schlenk tube equipped with a magnetic stir bar, were added CuI (171.4 mg, 0.9 mmol, 0.1 equiv), K<sub>3</sub>PO<sub>4</sub> (3.82 g, 18 mmol, 2.0 equiv), and D-prolinamide **SII**<sup>4</sup> (2.47 g, 9 mmol, 1.0 equiv). The tube was sealed with a septum, evacuated and refilled with nitrogen (3 cycles). Subsequently, a solution of 3-bromopyridine **SI**<sup>3</sup> (3.07 g, 13.5 mmol, 1.5 equiv) in EtOH (72 mL) was introduced, and the reaction mixture was stirred at 80 °C (oil bath temperature) for 24 hours. Upon completion, the mixture was cooled to room temperature and concentrated under reduced pressure. The residue was dissolved in EtOAc, washed with brine, dried over NaSO<sub>4</sub>, and concentrated. Purification by flash column chromatography using CH<sub>2</sub>Cl<sub>2</sub>/MeOH (v/v) = 20/1 as eluent afforded the desired catalyst **C6** (2.14 g, 5.1 mmol, 57% yield).

*Note:* The racemic catalyst that used for HPLC analysis was synthesized by mixing L-proline-derived catalyst **C4** and D-proline-derived catalyst **C6** in a 1:1 ratio.

### General procedure for the catalytic synthesis of products 3:

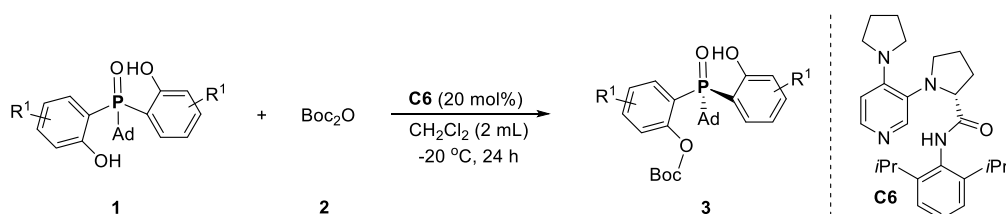

To a dry 10 mL Schlenk tube equipped with a magnetic stir bar, were added **C6** (16.8 mg, 0.04 mmol, 0.2 equiv), bisphenol **1** (0.2 mmol, 1.0 equiv), and CH<sub>2</sub>Cl<sub>2</sub> (2.0 mL). The tube was sealed with a septum, and the reaction mixture was cooled to -20 °C and stirred for 30 minutes. Subsequently, Boc<sub>2</sub>O **2** (70 μL, 65.4 mg, 0.3 mmol) was introduced, and the reaction was allowed to proceed at -20 °C for another 24 hours. Upon completion, the mixture was directly purified by flash column chromatography using petroleum ether/EtOAc (v/v) = 10/1~5/1 as eluent to afford the desired product **3**.

*Note:* The corresponding racemic product was prepared under identical conditions using DMAP as the catalyst.

### Kinetic resolution of racemic **3a**:

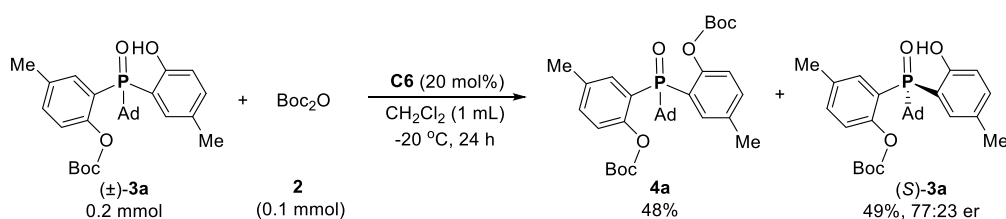

To a dry 10 mL Schlenk tube equipped with a magnetic stir bar, were added **C6** (8.4 mg, 0.02 mmol, 0.2 equiv), racemic **3a** (99.2 mg, 0.2 mmol, 2.0 equiv), and  $\text{CH}_2\text{Cl}_2$  (1.0 mL). The tube was sealed with a septum, and the reaction mixture was cooled to  $-20\text{ }^\circ\text{C}$  and stirred for 30 minutes. Subsequently,  $\text{Boc}_2\text{O}$  **2** (23.0  $\mu\text{L}$ , 0.1 mmol, 1.0 equiv) was introduced, and the reaction was allowed to proceed at  $-20\text{ }^\circ\text{C}$  for another 24 hours. Upon completion, the mixture was directly purified by flash column chromatography using petroleum ether/EtOAc (v/v) = 10/1 as eluent to afford product **4a** (56.9 mg, 48% yield based on racemic **3a**) and *(S)*-**3a** (48.5 mg, 49% yield based on racemic **3a**, 77:23 er).

### 1 mmol scale preparation of **3a**:

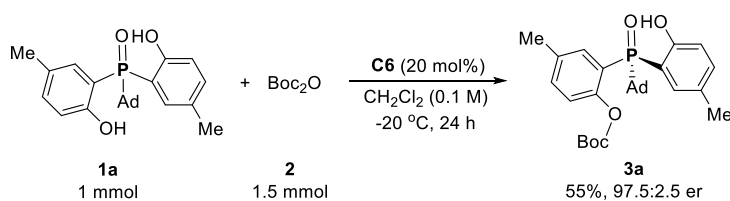

To a dry 50 mL round-bottom flask equipped with a magnetic stir bar, were added **C6** (84.1 mg, 0.2 mmol, 0.2 equiv), **1a** (396.2 mg, 1.0 mmol, 1.0 equiv), and  $\text{CH}_2\text{Cl}_2$  (10.0 mL). The flask was sealed with a septum, and the reaction mixture was cooled to  $-20\text{ }^\circ\text{C}$  and stirred for 30 minutes. Subsequently,  $\text{Boc}_2\text{O}$  **2** (0.35 mL, 1.5 mmol, 1.5 equiv) was introduced, and the reaction was allowed to proceed at  $-20\text{ }^\circ\text{C}$  for another 24 hours. Upon completion, the solvent was removed under reduced pressure, and the residue was purified by flash column chromatography using petroleum ether/EtOAc (v/v) = 10/1 as eluent to afford the desired product **3a** (276.2 mg, 0.55 mmol, 55% yield, 97.5:2.5 er).

### Synthetic transformation of **3a**:

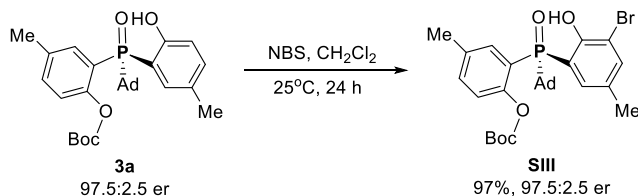

To a dry 10 mL Schlenk tube equipped with a magnetic stir bar, were added **3a** (49.6 mg, 0.1 mmol, 1.0 equiv), N-bromosuccinimide (21.2 mg, 0.12 mmol, 1.2 equiv), and  $\text{CH}_2\text{Cl}_2$  (2.0 mL). The tube was sealed with a septum, and the reaction mixture was stirred at  $25\text{ }^\circ\text{C}$  and for 24 hours. Upon completion, the mixture was directly purified

by flash column chromatography using petroleum ether/EtOAc (v/v) = 10/1 as eluent to afford the desired product **SIII** (56.0 mg, 0.097 mmol, 97% yield, 97.5:2.5 er).

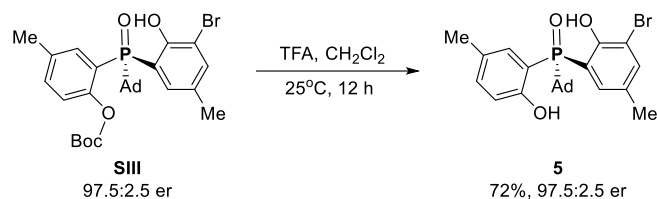

To a dry 10 mL Schlenk tube equipped with a magnetic stir bar, were added **SIII** (56.0 mg, 0.097 mmol, 1.0 equiv), CH<sub>2</sub>Cl<sub>2</sub> (1.0 mL), and trifluoroacetic acid (97 μL, 1.26 mmol, 13 equiv). The tube was sealed with a septum, and the reaction mixture was stirred at 25 °C and for 12 hours. Upon completion, the solvent was removed under reduced pressure, and the residue was purified by flash column chromatography using petroleum ether/EtOAc (v/v) = 10/1 as eluent to afford the desired product **5** (33.1 mg, 0.07 mmol, 72% yield, 97.5:2.5 er).

### Proposed reaction pathway:

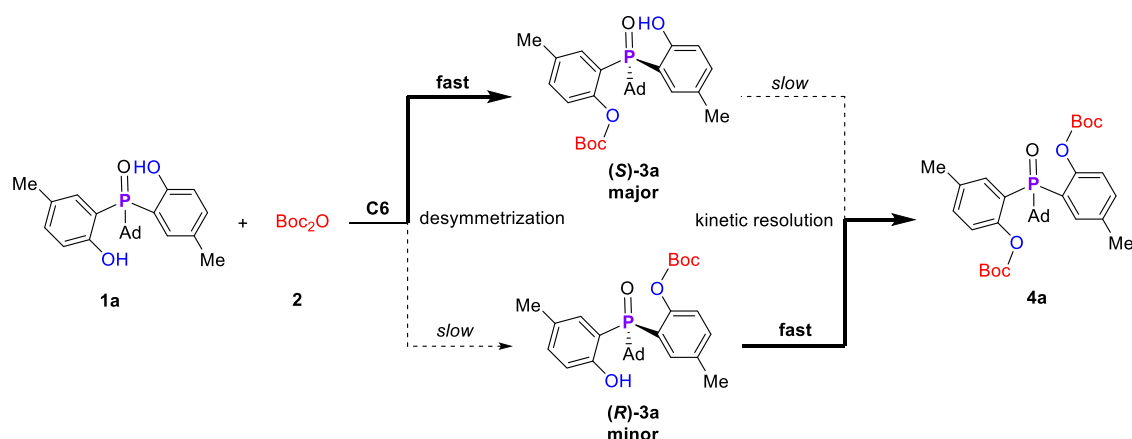

We propose that the overall process involves an initial desymmetrization of prochiral **1a**, followed by a subsequent kinetic resolution of the mono-O-Boc product **3a** (Scheme C2). In this context, excess Boc<sub>2</sub>O can further react with the minor enantiomer (*R*)-**3a**, converting it into the di-O-Boc-protected byproduct **4a**. This secondary transformation enhances the enantiomeric ratio of **3a** but concurrently diminishes its isolated yield.

### References cited in the SI:

1. (a) G.-H. Yang, Y. Li, X. Li and J.-P. Cheng, *Chem. Sci.*, 2019, **10**, 4322–4327; (b) Q.-H. Huang, Q.-Y. Zhou, C. Yang, L. Chen, J.-P. Cheng and X. Li, *Chem. Sci.*, 2021, **12**, 4582–4587; (c) H.-L. Hu, S. Fang, X. Luo, J. He, J.-H. Wu, Z. Su, Z. Xu and T. Wang, *Org. Lett.*, 2025, **27**, 109–114.
2. L. Cao, X.-P. Zhang, M.-S. Xie and H.-M. Guo, *J. Org. Chem.*, 2023, **88**, 341–346.
3. T. Yamamoto, R. Murakami and M. Suginome, *J. Am. Chem. Soc.*, 2017, **139**, 2557–2560.
4. V. K. Vyas and B. M. Bhanage, *Asian J. Org. Chem.*, 2018, **7**, 346–349.

**X-ray structure of product 3a (ellipsoid contour at 30% probability)**

Absolute configurations of the products **3** were assigned based on the crystal X-ray structures of **3a**. CCDC 2541536 (**3a**, obtained as colorless needles *via* evaporation of a petroleum ether/CH<sub>2</sub>Cl<sub>2</sub> solution) contains the supplementary X-ray crystallographic data. These data can be obtained free of charge from The Cambridge Crystallographic Data Centre via [www.ccdc.cam.ac.uk/data\\_request/cif](http://www.ccdc.cam.ac.uk/data_request/cif).

**Figure S1. ORTEP diagram of 3a with ellipsoid contour at 30% probability level**

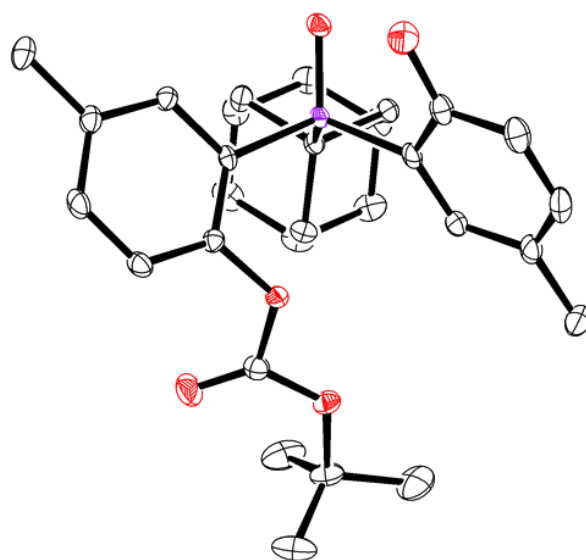

CCDC 2541536

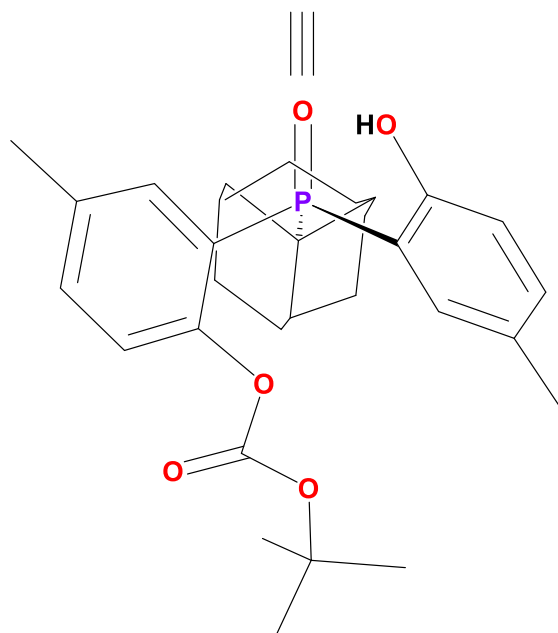

**3a**

**Table S1. Crystal data and structure refinement for 3a.**

|                                             |                                                               |
|---------------------------------------------|---------------------------------------------------------------|
| Identification code                         | WYK_3A_170K                                                   |
| Empirical formula                           | C <sub>29</sub> H <sub>37</sub> O <sub>5</sub> P              |
| Formula weight                              | 496.55                                                        |
| Temperature/K                               | 169.99(10)                                                    |
| Crystal system                              | monoclinic                                                    |
| Space group                                 | P2 <sub>1</sub>                                               |
| a/Å                                         | 8.50930(10)                                                   |
| b/Å                                         | 17.3102(3)                                                    |
| c/Å                                         | 8.9737(2)                                                     |
| α/°                                         | 90                                                            |
| β/°                                         | 92.984(2)                                                     |
| γ/°                                         | 90                                                            |
| Volume/Å <sup>3</sup>                       | 1320.01(4)                                                    |
| Z                                           | 2                                                             |
| ρ <sub>calc</sub> /cm <sup>3</sup>          | 1.249                                                         |
| μ/mm <sup>-1</sup>                          | 1.217                                                         |
| F(000)                                      | 532.0                                                         |
| Crystal size/mm <sup>3</sup>                | 0.15 × 0.13 × 0.12                                            |
| Radiation                                   | Cu Kα (λ = 1.54184)                                           |
| 2θ range for data collection/°              | 9.87 to 146.808                                               |
| Index ranges                                | -10 ≤ h ≤ 6, -19 ≤ k ≤ 21, -10 ≤ l ≤ 11                       |
| Reflections collected                       | 8902                                                          |
| Independent reflections                     | 4815 [R <sub>int</sub> = 0.0379, R <sub>sigma</sub> = 0.0495] |
| Data/restraints/parameters                  | 4815/1/322                                                    |
| Goodness-of-fit on F <sup>2</sup>           | 1.023                                                         |
| Final R indexes [I ≥ 2σ (I)]                | R <sub>1</sub> = 0.0419, wR <sub>2</sub> = 0.1094             |
| Final R indexes [all data]                  | R <sub>1</sub> = 0.0435, wR <sub>2</sub> = 0.1117             |
| Largest diff. peak/hole / e Å <sup>-3</sup> | 0.43/-0.31                                                    |
| Flack parameter                             | 0.006(16)                                                     |

## Characterization of products:

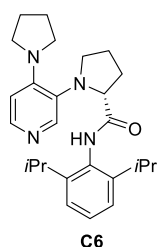

### ***(R)-N-(2,6-Diisopropylphenyl)-1-(4-(pyrrolidin-1-yl)pyridin-3-yl)pyrrolidine-2-carboxamide (C6)*<sup>2</sup>**

Following the above procedure, **SI** (3.07 g, 13.5 mmol) and **SII** (2.47 g, 9 mmol) was reacted at 80 °C for 24 hours to give **C6** as a white solid, 2.14 g, 57% yield, 99.5:0.5 er, obtained by the purification with flash column chromatography on silica gel using CH<sub>2</sub>Cl<sub>2</sub>/MeOH (v/v) = 20/1 as eluent.

<sup>1</sup>H NMR (400 MHz, CDCl<sub>3</sub>) δ 8.42 (s, 1H), 8.18 (s, 1H), 8.14 (s, 1H), 7.23 (t, *J* = 7.7 Hz, 1H), 7.09 (d, *J* = 7.7 Hz, 2H), 6.68 (s, 1H), 4.34 (t, *J* = 7.8 Hz, 1H), 3.73 – 3.58 (m, 1H), 3.42 (dd, *J* = 9.6, 6.9 Hz, 2H), 3.37 – 3.31 (m, 2H), 2.86 – 2.79 (m, 1H), 2.57 (dd, *J* = 12.6, 7.1 Hz, 1H), 2.21 (dd, *J* = 12.6, 7.5 Hz, 1H), 2.06 (t, *J* = 7.8 Hz, 2H), 1.91 (t, *J* = 6.6 Hz, 4H), 1.16 (d, *J* = 76.3 Hz, 14H). <sup>13</sup>C NMR (101 MHz, CDCl<sub>3</sub>) δ 172.4, 151.1, 146.2, 145.4, 143.1, 130.8, 128.1, 123.2, 110.7, 65.7, 54.7, 49.7, 30.8, 28.5, 24.9, 24.1, 23.4. Proton and Carbon NMR was consistent with literature data<sup>2</sup>. HPLC (Daicel CHIRALPAK<sup>®</sup> AD-H, isopropanol/n-hexane = 20/80, flow rate = 1.0 mL/min, λ = 254 nm) tR = 4.7 min (major), 5.9 min (minor).

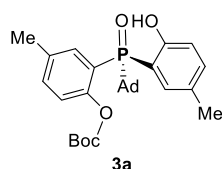

### ***2-((S)-(Adamantan-1-yl)(2-hydroxy-5-methylphenyl)phosphoryl)-4-methylphenyl tert-butyl carbonate (3a)***

Following the general procedure, **1a** (79.2 mg, 0.2 mmol) and **2** (70 μL, 0.3 mmol) was reacted at -20 °C for 24 hours to give **3a** as a white solid, 59.5 mg, 60% yield, 97.5:2.5 er, mp: 160-162 °C, obtained by the purification with flash column chromatography on silica gel using petroleum ether/EtOAc (v/v) = 10/1 as eluent.

<sup>1</sup>H NMR (400 MHz, CDCl<sub>3</sub>) δ 11.67 (s, 1H), 7.92 (dd, *J* = 11.8, 2.5 Hz, 1H), 7.41 (dd, *J* = 12.4, 2.5 Hz, 1H), 7.34 (dd, *J* = 8.4, 2.4 Hz, 1H), 7.20 – 7.14 (m, 2H), 6.79 (dd, *J* = 8.5, 4.6 Hz, 1H), 2.40 (s, 3H), 2.28 (s, 3H), 2.03 (d, *J* = 5.4 Hz, 9H), 1.73 (s, 6H), 1.53 (s, 9H). <sup>13</sup>C NMR (101 MHz, CDCl<sub>3</sub>) δ 162.5, 162.4, 150.7, 149.6, 149.5, 135.2, 135.1, 134.8, 134.7, 134.6, 134.6, 133.8, 133.8, 131.5, 131.4, 126.9, 126.8, 122.7, 122.6, 122.1, 121.3, 118.3, 118.2, 109.7, 108.8, 84.0, 39.3, 38.6, 36.3, 34.9, 27.6, 27.6, 27.5, 20.9, 20.7. <sup>31</sup>P NMR (162 MHz, CDCl<sub>3</sub>) δ 47.6. HRMS (ESI-TOF) *m/z*: [M + H]<sup>+</sup> calcd. for C<sub>29</sub>H<sub>38</sub>O<sub>5</sub>P<sup>+</sup> 497.2451, found 497.2448. HPLC (Daicel CHIRALPAK<sup>®</sup> ID, isopropanol/n-hexane = 10/90, flow rate = 1.0 mL/min, λ = 220 nm) tR = 12.8 min (major), 16.9 min (minor).

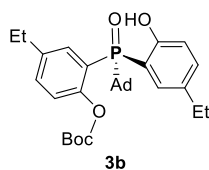

**2-((S)-(Adamantan-1-yl)(5-ethyl-2-hydroxyphenyl)phosphoryl)-4-ethylphenyl tert-butyl carbonate (3b)**

Following the general procedure, **1b** (84.8 mg, 0.2 mmol) and **2** (70  $\mu$ L, 0.3 mmol) was reacted at -20  $^{\circ}$ C for 24 hours to give **3b** as a white solid, 58.7 mg, 56% yield, 96.5:3.5 er, mp: 179-180  $^{\circ}$ C, obtained by the purification with flash column chromatography on silica gel using petroleum ether/EtOAc (v/v) = 10/1 as eluent.

$^1\text{H}$  NMR (400 MHz,  $\text{CDCl}_3$ )  $\delta$  11.74 (s, 1H), 7.94 (dd,  $J$  = 12.0, 2.4 Hz, 1H), 7.46 (dd,  $J$  = 12.6, 2.4 Hz, 1H), 7.37 (dd,  $J$  = 8.4, 2.5 Hz, 1H), 7.24 – 7.17 (m, 2H), 6.81 (dd,  $J$  = 8.5, 4.6 Hz, 1H), 2.70 (q,  $J$  = 7.6 Hz, 2H), 2.59 (dq,  $J$  = 15.0, 7.2 Hz, 2H), 2.02 (d,  $J$  = 5.2 Hz, 9H), 1.72 (s, 6H), 1.53 (s, 9H), 1.25 (t,  $J$  = 7.6 Hz, 3H), 1.20 (t,  $J$  = 7.6 Hz, 3H).  $^{13}\text{C}$  NMR (101 MHz,  $\text{CDCl}_3$ )  $\delta$  162.6, 162.6, 150.9, 149.7, 149.7, 141.3, 141.2, 133.7, 133.7, 133.5, 133.4, 133.4, 132.6, 132.5, 130.5, 130.4, 122.8, 122.7, 122.1, 121.3, 118.3, 118.2, 109.6, 108.7, 84.0, 39.3, 38.6, 36.3, 35.0, 28.2, 28.0, 27.6, 27.6, 27.5, 16.0, 15.3.  $^{31}\text{P}$  NMR (162 MHz,  $\text{CDCl}_3$ )  $\delta$  48.1. HRMS (ESI-TOF)  $m/z$ :  $[\text{M} + \text{H}]^+$  calcd. for  $\text{C}_{31}\text{H}_{42}\text{O}_5\text{P}^+$  525.2764, found 525.2778. HPLC (Daicel CHIRALPAK<sup>®</sup> ID, isopropanol/n-hexane = 10/90, flow rate = 1.0 mL/min,  $\lambda$  = 220 nm) tR = 9.3 min (major), 10.5 min (minor).

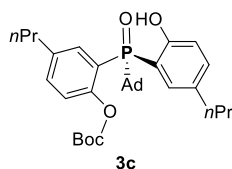

**2-((S)-(Adamantan-1-yl)(2-hydroxy-5-propylphenyl)phosphoryl)-4-propylphenyl tert-butyl carbonate (3c)**

Following the general procedure, **1c** (90.4 mg, 0.2 mmol) and **2** (70  $\mu$ L, 0.3 mmol) was reacted at -20  $^{\circ}$ C for 24 hours to give **3c** as a yellow oil, 70.7 mg, 64% yield, 96.5:3.5 er, obtained by the purification with flash column chromatography on silica gel using petroleum ether/EtOAc (v/v) = 10/1 as eluent.

$^1\text{H}$  NMR (400 MHz,  $\text{CDCl}_3$ )  $\delta$  11.78 (s, 1H), 7.91 (d,  $J$  = 9.5 Hz, 1H), 7.44 (d,  $J$  = 12.4 Hz, 1H), 7.34 (d,  $J$  = 8.4 Hz, 1H), 7.23 – 7.15 (m, 2H), 6.81 (dd,  $J$  = 8.5, 4.6 Hz, 1H), 2.63 (t,  $J$  = 7.7 Hz, 2H), 2.52 (t,  $J$  = 7.4 Hz, 2H), 2.02 (d,  $J$  = 5.3 Hz, 9H), 1.71 (s, 6H), 1.68 – 1.59 (m, 4H), 1.54 (s, 9H), 0.93 (dt,  $J$  = 11.1, 7.3 Hz, 6H).  $^{13}\text{C}$  NMR (101 MHz,  $\text{CDCl}_3$ )  $\delta$  162.7, 162.7, 150.9, 149.8, 149.7, 139.9, 139.8, 134.3, 134.2, 134.0, 134.0, 133.1, 133.1, 131.8, 131.7, 131.1, 131.0, 122.7, 122.7, 122.0, 121.2, 118.2, 118.2, 109.4, 108.5, 84.0, 77.2, 39.3, 38.6, 37.3, 37.1, 36.3, 35.0, 27.6, 27.5, 24.6, 24.4, 13.7, 13.5.  $^{31}\text{P}$  NMR (162 MHz,  $\text{CDCl}_3$ )  $\delta$  48.1. HRMS (ESI-TOF)  $m/z$ :  $[\text{M} + \text{H}]^+$  calcd. for  $\text{C}_{33}\text{H}_{46}\text{O}_5\text{P}^+$  553.3077, found 553.3081. HPLC (Daicel CHIRALPAK<sup>®</sup> IC,

isopropanol/n-hexane = 10/90, flow rate = 1.0 mL/min,  $\lambda$  = 220 nm) tR = 28.1 min (minor), 33.6 min (major).

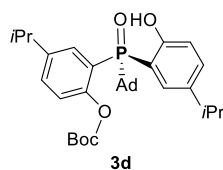

**2-((S)-(Adamantan-1-yl)(2-hydroxy-5-isopropylphenyl)phosphoryl)-4-isopropylphenyl tert-butyl carbonate (3d)**

Following the general procedure, **1d** (90.4 mg, 0.2 mmol) and **2** (70  $\mu$ L, 0.3 mmol) was reacted at -20 °C for 24 hours to give **3d** as a white solid, 67.3 mg, 61% yield, 96:4 er, mp: 166-168 °C, obtained by the purification with flash column chromatography on silica gel using petroleum ether/EtOAc (v/v) = 10/1 as eluent.

<sup>1</sup>H NMR (400 MHz, CDCl<sub>3</sub>)  $\delta$  11.78 (s, 1H), 7.96 (dd,  $J$  = 12.2, 2.4 Hz, 1H), 7.50 (dd,  $J$  = 12.7, 2.4 Hz, 1H), 7.40 (dd,  $J$  = 8.4, 2.5 Hz, 1H), 7.24 (dd,  $J$  = 8.5, 4.8 Hz, 2H), 6.83 (dd,  $J$  = 8.5, 4.6 Hz, 1H), 2.97 (h,  $J$  = 6.9 Hz, 1H), 2.85 (p,  $J$  = 6.9 Hz, 1H), 2.02 (d,  $J$  = 5.4 Hz, 9H), 1.72 (s, 6H), 1.55 (s, 10H), 1.27 – 1.21 (m, 12H). <sup>13</sup>C NMR (101 MHz, CDCl<sub>3</sub>)  $\delta$  162.7, 162.7, 151.1, 149.8, 149.8, 145.9, 145.8, 138.1, 138.0, 132.5, 132.4, 131.8, 131.8, 131.1, 131.1, 129.2, 129.1, 122.9, 122.8, 122.2, 121.4, 118.2, 118.1, 109.5, 108.6, 84.1, 39.3, 38.6, 36.4, 35.1, 33.6, 33.2, 27.7, 27.6, 24.4, 23.9, 23.8. <sup>31</sup>P NMR (162 MHz, CDCl<sub>3</sub>)  $\delta$  48.8. HRMS (ESI-TOF)  $m/z$ : [M + H]<sup>+</sup> calcd. for C<sub>33</sub>H<sub>46</sub>O<sub>5</sub>P<sup>+</sup> 553.3077, found 553.3074. HPLC (Daicel CHIRALPAK® ID, isopropanol/n-hexane = 5/95, flow rate = 1.0 mL/min,  $\lambda$  = 220 nm) tR = 11.1 min (major), 12.3 min (minor).

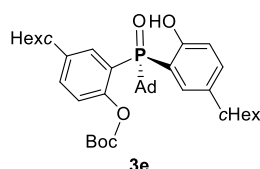

**2-((S)-(Adamantan-1-yl)(5-cyclohexyl-2-hydroxyphenyl)phosphoryl)-4-cyclohexylphenyl tert-butyl carbonate (3e)**

Following the general procedure, **1e** (106.4 mg, 0.2 mmol) and **2** (70  $\mu$ L, 0.3 mmol) was reacted at -20 °C for 24 hours to give **3e** as a white solid, 76.8 mg, 60% yield, 95.5:4.5 er, mp: 115-117 °C, obtained by the purification with flash column chromatography on silica gel using petroleum ether/EtOAc (v/v) = 10/1 as eluent.

<sup>1</sup>H NMR (400 MHz, CDCl<sub>3</sub>)  $\delta$  11.77 (s, 1H), 7.90 (dd,  $J$  = 12.2, 2.4 Hz, 1H), 7.43 – 7.35 (m, 2H), 7.23 (dd,  $J$  = 8.4, 4.7 Hz, 2H), 6.82 (dd,  $J$  = 8.5, 4.6 Hz, 1H), 2.59 – 2.50 (m, 1H), 2.48 – 2.38 (m, 1H), 2.01 (d,  $J$  = 5.4 Hz, 10H), 1.90 – 1.81 (m, 8H), 1.72 (s, 7H), 1.54 (s, 10H), 1.41 – 1.21 (m, 12H). <sup>13</sup>C NMR (101 MHz, CDCl<sub>3</sub>)  $\delta$  162.7, 162.7, 151.1, 150.0, 150.0, 145.1, 145.0, 137.4, 137.3, 132.7, 132.6, 132.2, 132.2, 131.5, 131.5, 129.3, 129.2, 122.9, 122.9, 122.3, 121.4, 118.2, 118.2, 109.5, 108.5, 83.9, 43.8, 43.4, 39.3, 38.6, 36.4, 35.1, 34.9, 34.3, 34.1, 27.7, 27.6, 26.8, 26.8, 26.7, 26.0, 25.9. <sup>31</sup>P NMR

(162 MHz, CDCl<sub>3</sub>)  $\delta$  49.1. HRMS (ESI-TOF)  $m/z$ : [M + H]<sup>+</sup> calcd. for C<sub>39</sub>H<sub>54</sub>O<sub>5</sub>P<sup>+</sup> 633.3703, found 633.3708. HPLC (Daicel CHIRALPAK<sup>®</sup> ID, isopropanol/n-hexane = 5/95, flow rate = 1.0 mL/min,  $\lambda$  = 220 nm) tR = 13.2 min (minor), 14.3 min (major).

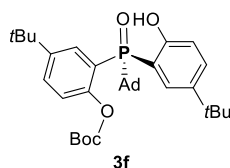

**2-((S)-(Adamantan-1-yl)(5-(tert-butyl)-2-hydroxyphenyl)phosphoryl)-4-(tert-butyl)phenyl tert-butyl carbonate (3f)**

Following the general procedure, **1f** (96.0 mg, 0.2 mmol) and **2** (70  $\mu$ L, 0.3 mmol) was reacted at -20 °C for 24 hours to give **3f** as a yellow oil, 75.4 mg, 65% yield, 92.5:7.5 er, obtained by the purification with flash column chromatography on silica gel using petroleum ether/EtOAc (v/v) = 10/1 as eluent.

<sup>1</sup>H NMR (400 MHz, CDCl<sub>3</sub>)  $\delta$  11.77 (s, 1H), 8.06 (dd,  $J$  = 12.7, 2.5 Hz, 1H), 7.61 (dd,  $J$  = 12.9, 2.5 Hz, 1H), 7.55 (dd,  $J$  = 8.6, 2.7 Hz, 1H), 7.40 (d,  $J$  = 8.8 Hz, 1H), 7.22 (dd,  $J$  = 8.6, 4.8 Hz, 1H), 6.84 (dd,  $J$  = 8.8, 4.7 Hz, 1H), 2.03 (d,  $J$  = 5.3 Hz, 9H), 1.71 (s, 6H), 1.55 (s, 9H), 1.32 (s, 9H), 1.29 (s, 9H). <sup>13</sup>C NMR (101 MHz, CDCl<sub>3</sub>)  $\delta$  162.3, 162.3, 151.3, 150.0, 149.9, 148.2, 140.5, 140.4, 131.2, 131.2, 130.9, 130.8, 130.2, 130.2, 127.9, 127.8, 122.9, 122.8, 122.1, 121.3, 117.9, 117.9, 109.3, 108.3, 84.1, 39.2, 38.5, 36.4, 35.2, 34.7, 34.1, 31.5, 31.3, 27.7, 27.6. <sup>31</sup>P NMR (162 MHz, CDCl<sub>3</sub>)  $\delta$  49.4. HRMS (ESI-TOF)  $m/z$ : [M + H]<sup>+</sup> calcd. for C<sub>35</sub>H<sub>50</sub>O<sub>5</sub>P<sup>+</sup> 581.3390, found 581.3381. HPLC (Daicel CHIRALPAK<sup>®</sup> AD-H, isopropanol/n-hexane = 5/95, flow rate = 1.0 mL/min,  $\lambda$  = 220 nm) tR = 4.8 min (major), 5.4 min (minor).

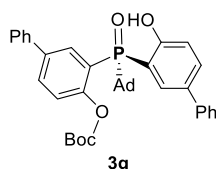

**3-((S)-(Adamantan-1-yl)(4-hydroxy-[1,1'-biphenyl]-3-yl)phosphoryl)-[1,1'-biphenyl]-4-yl tert-butyl carbonate (3g)**

Following the general procedure, **1g** (104.0 mg, 0.2 mmol) and **2** (70  $\mu$ L, 0.3 mmol) was reacted at -20 °C for 24 hours to give **3g** as a white solid, 52.1 mg, 42% yield, 80.5:19.5 er, mp: 177-179 °C, obtained by the purification with flash column chromatography on silica gel using petroleum ether/EtOAc (v/v) = 10/1 as eluent.

<sup>1</sup>H NMR (400 MHz, CDCl<sub>3</sub>)  $\delta$  11.90 (s, 1H), 8.40 (dd,  $J$  = 11.9, 2.3 Hz, 1H), 7.85 (dd,  $J$  = 12.7, 2.2 Hz, 1H), 7.77 (dd,  $J$  = 8.5, 2.4 Hz, 1H), 7.66 – 7.55 (m, 3H), 7.52 (d,  $J$  = 7.0 Hz, 2H), 7.48 – 7.34 (m, 6H), 7.29 (t,  $J$  = 7.4 Hz, 1H), 6.99 (dd,  $J$  = 8.6, 4.6 Hz, 1H), 2.10 (d,  $J$  = 25.0 Hz, 9H), 1.75 (s, 6H), 1.41 (s, 9H). <sup>13</sup>C NMR (101 MHz, CDCl<sub>3</sub>)  $\delta$  164.2, 164.2, 151.3, 151.3, 150.8, 140.4, 139.3, 138.5, 138.5, 133.0, 133.0, 132.8, 132.7, 131.8, 131.8, 131.4, 131.3, 129.6, 129.5, 128.9, 128.8, 127.8, 127.1, 126.7, 126.6, 123.6, 123.5, 122.9, 122.1, 119.0, 118.9, 110.6, 109.6, 84.4, 39.4, 38.7, 36.3, 35.1, 27.6,

27.5, 27.4.  $^{31}\text{P}$  NMR (162 MHz,  $\text{CDCl}_3$ )  $\delta$  47.9. HRMS (ESI-TOF)  $m/z$ :  $[\text{M} + \text{H}]^+$  calcd. for  $\text{C}_{39}\text{H}_{42}\text{O}_5\text{P}^+$  621.2764, found 621.2759. HPLC (Daicel CHIRALPAK<sup>®</sup> ID, isopropanol/n-hexane = 10/90, flow rate = 1.0 mL/min,  $\lambda$  = 220 nm)  $t_R$  = 11.9 min (major), 17.8 min (minor).

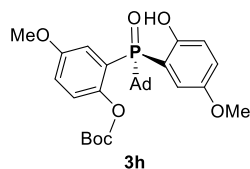

**2-((S)-(Adamantan-1-yl)(2-hydroxy-5-methoxyphenyl)phosphoryl)-4-methoxyphenyl tert-butyl carbonate (3h)**

Following the general procedure, **1h** (85.6 mg, 0.2 mmol) and **2** (70  $\mu\text{L}$ , 0.3 mmol) was reacted at  $-20\text{ }^\circ\text{C}$  for 24 hours to give **3h** as a white solid, 41.2 mg, 39% yield, 93:7 er, mp: 174-176  $^\circ\text{C}$ , obtained by the purification with flash column chromatography on silica gel using petroleum ether/EtOAc (v/v) = 5/1 as eluent.

$^1\text{H}$  NMR (400 MHz,  $\text{CDCl}_3$ )  $\delta$  7.64 (dd,  $J$  = 12.5, 3.1 Hz, 1H), 7.22 – 7.16 (m, 2H), 7.05 (dd,  $J$  = 9.0, 3.1 Hz, 1H), 6.97 (dd,  $J$  = 9.1, 3.0 Hz, 1H), 6.83 (dd,  $J$  = 9.0, 5.2 Hz, 1H), 3.84 (s, 3H), 3.76 (s, 3H), 2.03 (d,  $J$  = 5.2 Hz, 9H), 1.72 (s, 6H), 1.51 (s, 9H).  $^{13}\text{C}$  NMR (101 MHz,  $\text{CDCl}_3$ )  $\delta$  158.6, 156.6, 156.5, 151.2, 151.1, 151.0, 145.1, 145.1, 124.2, 124.1, 123.2, 122.4, 120.3, 120.3, 119.1, 119.1, 119.0, 118.9, 118.6, 118.6, 115.8, 115.7, 109.8, 108.9, 84.1, 55.8, 39.4, 38.7, 36.3, 34.9, 27.6, 27.5, 27.5.  $^{31}\text{P}$  NMR (162 MHz,  $\text{CDCl}_3$ )  $\delta$  47.2. HRMS (ESI-TOF)  $m/z$ :  $[\text{M} + \text{H}]^+$  calcd. for  $\text{C}_{29}\text{H}_{38}\text{O}_7\text{P}^+$  529.2350, found 529.2347. HPLC (Daicel CHIRALPAK<sup>®</sup> ID, isopropanol/n-hexane = 20/80, flow rate = 1.0 mL/min,  $\lambda$  = 220 nm)  $t_R$  = 11.2 min (major), 15.1 min (minor).

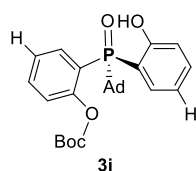

**2-((S)-(Adamantan-1-yl)(2-hydroxyphenyl)phosphoryl)phenyl tert-butyl carbonate (3i)**

Following the general procedure, **1i** (73.6 mg, 0.2 mmol) and **2** (70  $\mu\text{L}$ , 0.3 mmol) was reacted at  $-20\text{ }^\circ\text{C}$  for 24 hours to give **3i** as a white solid, 34.4 mg, 37% yield, 94.5:5.5 er, mp: 129-131  $^\circ\text{C}$ , obtained by the purification with flash column chromatography on silica gel using petroleum ether/EtOAc (v/v) = 10/1 as eluent.

$^1\text{H}$  NMR (400 MHz,  $\text{CDCl}_3$ )  $\delta$  11.85 (s, 1H), 8.13 – 8.04 (m, 1H), 7.59 – 7.52 (m, 2H), 7.38 – 7.29 (m, 3H), 6.88 (dd,  $J$  = 8.4, 4.4 Hz, 1H), 6.83 (td,  $J$  = 7.5, 3.1 Hz, 1H), 2.04 (d,  $J$  = 5.3 Hz, 9H), 1.72 (s, 6H), 1.52 (s, 9H).  $^{13}\text{C}$  NMR (101 MHz,  $\text{CDCl}_3$ )  $\delta$  164.8, 164.8, 152.1, 152.1, 150.5, 134.3, 134.2, 133.7, 133.7, 133.3, 133.3, 131.6, 131.5, 125.3, 125.2, 123.1, 123.1, 122.6, 121.7, 118.6, 118.5, 118.0, 117.9, 110.1, 109.2, 84.1, 39.3, 38.6, 36.3, 34.9, 27.6, 27.6, 27.5.  $^{31}\text{P}$  NMR (162 MHz,  $\text{CDCl}_3$ )  $\delta$  47.4. HRMS (ESI-TOF)  $m/z$ :  $[\text{M} + \text{H}]^+$  calcd. for  $\text{C}_{27}\text{H}_{34}\text{O}_5\text{P}^+$  469.2138, found 469.2132. HPLC (Daicel

CHIRALPAK<sup>®</sup> ID, isopropanol/n-hexane = 10/90, flow rate = 1.0 mL/min,  $\lambda$  = 220 nm)  
tR = 16.0 min (major), 18.3 min (minor).

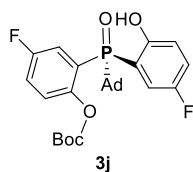

**2-((S)-(Adamantan-1-yl)(5-fluoro-2-hydroxyphenyl)phosphoryl)-4-fluorophenyl  
tert-butyl carbonate (3j)**

Following the general procedure, **1j** (80.8 mg, 0.2 mmol) and **2** (70  $\mu$ L, 0.3 mmol) was reacted at -20 °C for 24 hours to give **3j** as a yellow solid, 42.2 mg, 42% yield, 82.5:17.5 er, mp: 174-175 °C, obtained by the purification with flash column chromatography on silica gel using petroleum ether/EtOAc (v/v) = 10/1 as eluent.

<sup>1</sup>H NMR (400 MHz, CDCl<sub>3</sub>)  $\delta$  11.58 (s, 1H), 7.83 (ddd,  $J$  = 11.8, 8.5, 3.1 Hz, 1H), 7.47 – 7.33 (m, 2H), 7.26 (d,  $J$  = 3.9 Hz, 1H), 7.14 – 7.07 (m, 1H), 6.85 (dt,  $J$  = 9.3, 4.9 Hz, 1H), 2.07 – 1.98 (m, 9H), 1.72 (d,  $J$  = 14.5 Hz, 6H), 1.55 (s, 9H). <sup>13</sup>C NMR (101 MHz, CDCl<sub>3</sub>)  $\delta$  161.1, 150.3, 147.4, 147.4, 124.4, 124.3, 124.2, 123.1, 121.5, 121.5, 121.3, 121.3, 121.2, 121.0, 121.0, 120.5, 120.4, 120.2, 120.2, 119.9, 119.9, 119.9, 119.8, 117.4, 117.3, 117.2, 117.1, 108.5, 84.9, 39.6, 38.9, 36.2, 34.8, 27.5, 27.4. <sup>19</sup>F NMR (377 MHz, CDCl<sub>3</sub>)  $\delta$  -115.3 (d,  $J$  = 2.8 Hz), -124.3 (d,  $J$  = 5.3 Hz). <sup>31</sup>P NMR (162 MHz, CDCl<sub>3</sub>)  $\delta$  45.6 (dd,  $J$  = 5.3, 2.8 Hz). HRMS (ESI-TOF)  $m/z$ : [M + H]<sup>+</sup> calcd. for C<sub>27</sub>H<sub>32</sub>F<sub>2</sub>O<sub>5</sub>P<sup>+</sup> 505.1950, found 505.1951. HPLC (Daicel CHIRALPAK<sup>®</sup> ID, isopropanol/n-hexane = 10/90, flow rate = 1.0 mL/min,  $\lambda$  = 220 nm) tR = 7.7 min (major), 10.0 min (minor).

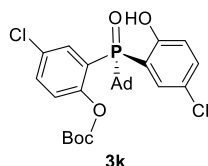

**2-((S)-(Adamantan-1-yl)(5-chloro-2-hydroxyphenyl)phosphoryl)-4-chlorophenyl  
tert-butyl carbonate (3k)**

Following the general procedure, **1k** (87.0 mg, 0.2 mmol) and **2** (70  $\mu$ L, 0.3 mmol) was reacted at -20 °C for 24 hours to give **3k** as a yellow solid, 41.8 mg, 39% yield, 77.5:22.5 er, mp: 165-166 °C, obtained by the purification with flash column chromatography on silica gel using petroleum ether/CH<sub>2</sub>Cl<sub>2</sub> (v/v) = 1/2 as eluent.

<sup>1</sup>H NMR (400 MHz, CDCl<sub>3</sub>)  $\delta$  11.83 (s, 1H), 8.10 (dd,  $J$  = 11.6, 2.7 Hz, 1H), 7.67 (dd,  $J$  = 12.2, 2.6 Hz, 1H), 7.52 (dd,  $J$  = 8.8, 2.7 Hz, 1H), 7.37 – 7.29 (m, 2H), 6.84 (dd,  $J$  = 8.9, 4.8 Hz, 1H), 2.07 – 1.98 (m, 9H), 1.74 (s, 6H), 1.57 (s, 9H). <sup>13</sup>C NMR (101 MHz, CDCl<sub>3</sub>)  $\delta$  163.5, 163.5, 150.1, 149.9, 149.9, 134.4, 134.3, 134.1, 134.1, 133.5, 133.5, 131.4, 131.3, 130.8, 130.7, 124.0, 124.0, 123.8, 123.1, 123.0, 122.9, 120.3, 120.3, 110.8, 109.9, 85.2, 39.7, 39.0, 36.2, 34.8, 27.7, 27.5, 27.4. <sup>31</sup>P NMR (162 MHz, CDCl<sub>3</sub>)  $\delta$  46.0. HRMS (ESI-TOF)  $m/z$ : [M + H]<sup>+</sup> calcd. for C<sub>27</sub>H<sub>32</sub>Cl<sub>2</sub>O<sub>5</sub>P<sup>+</sup> 537.1359, found 537.1368. HPLC (Daicel CHIRALPAK<sup>®</sup> ID, isopropanol/n-hexane = 10/90, flow rate = 1.0

mL/min,  $\lambda = 220$  nm) tR = 6.8 min (major), 8.4 min (minor).

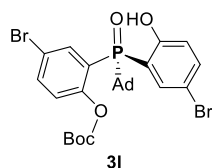

**2-((S)-(Adamantan-1-yl)(5-bromo-2-hydroxyphenyl)phosphoryl)-4-bromophenyl tert-butyl carbonate (3l)**

Following the general procedure, **1l** (104.8 mg, 0.2 mmol) and **2** (70  $\mu$ L, 0.3 mmol) was reacted at  $-20$   $^{\circ}$ C for 24 hours to give **3l** as a yellow solid, 47.8 mg, 38% yield, 81.5:18.5 er, mp: 171-173  $^{\circ}$ C, obtained by the purification with flash column chromatography on silica gel using petroleum ether/ $\text{CH}_2\text{Cl}_2$  (v/v) = 1/2 as eluent.

$^1\text{H}$  NMR (400 MHz,  $\text{CDCl}_3$ )  $\delta$  11.87 (s, 1H), 8.24 (dd,  $J = 11.5, 2.5$  Hz, 1H), 7.78 (dd,  $J = 12.0, 2.5$  Hz, 1H), 7.67 (dd,  $J = 8.8, 2.5$  Hz, 1H), 7.44 (dd,  $J = 9.3, 2.8$  Hz, 1H), 7.31 – 7.26 (m, 1H), 6.79 (dd,  $J = 8.9, 4.8$  Hz, 1H), 2.08 – 1.97 (m, 9H), 1.74 (s, 6H), 1.58 (s, 9H).  $^{13}\text{C}$  NMR (101 MHz,  $\text{CDCl}_3$ )  $\delta$  164.0, 163.9, 150.5, 150.5, 150.0, 137.2, 137.2, 136.9, 136.9, 136.5, 136.5, 133.6, 133.5, 124.4, 124.3, 124.2, 123.4, 120.8, 120.7, 119.0, 118.9, 111.5, 110.6, 110.2, 110.0, 85.3, 39.8, 39.1, 36.2, 34.9, 27.7, 27.5, 27.4.  $^{31}\text{P}$  NMR (162 MHz,  $\text{CDCl}_3$ )  $\delta$  45.9. HRMS (ESI-TOF)  $m/z$ :  $[\text{M} + \text{H}]^+$  calcd. for  $\text{C}_{27}\text{H}_{32}\text{Br}_2\text{O}_5\text{P}^+$  625.0349, found 625.0357. HPLC (Daicel CHIRALPAK<sup>®</sup> ID, isopropanol/n-hexane = 10/90, flow rate = 1.0 mL/min,  $\lambda = 220$  nm) tR = 6.8 min (major), 9.2 min (minor).

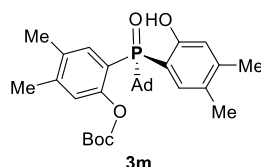

**2-((S)-(Adamantan-1-yl)(2-hydroxy-4,5-dimethylphenyl)phosphoryl)-4,5-dimethylphenyl tert-butyl carbonate (3m)**

Following the general procedure, **1m** (84.8 mg, 0.2 mmol) and **2** (70  $\mu$ L, 0.3 mmol) was reacted at  $-20$   $^{\circ}$ C for 24 hours to give **3m** as a yellow oil, 71.2 mg, 68% yield, 96:4 er, obtained by the purification with flash column chromatography on silica gel using petroleum ether/EtOAc (v/v) = 10/1 as eluent.

$^1\text{H}$  NMR (400 MHz,  $\text{CDCl}_3$ )  $\delta$  11.62 (s, 1H), 7.83 (d,  $J = 11.6$  Hz, 1H), 7.33 (d,  $J = 12.1$  Hz, 1H), 7.05 (d,  $J = 4.6$  Hz, 1H), 6.68 (d,  $J = 4.5$  Hz, 1H), 2.28 (s, 6H), 2.18 (d,  $J = 4.4$  Hz, 6H), 2.01 (d,  $J = 5.2$  Hz, 9H), 1.72 (s, 6H), 1.53 (s, 9H).  $^{13}\text{C}$  NMR (101 MHz,  $\text{CDCl}_3$ )  $\delta$  162.7, 162.7, 151.0, 149.6, 149.6, 143.0, 143.0, 142.6, 142.6, 135.0, 134.9, 134.0, 133.9, 131.8, 131.7, 126.1, 126.0, 123.9, 123.8, 119.5, 119.2, 119.1, 118.6, 107.2, 106.2, 83.8, 39.2, 38.5, 36.4, 34.9, 27.7, 27.6, 27.5, 20.0, 20.0, 19.3, 19.0.  $^{31}\text{P}$  NMR (162 MHz,  $\text{CDCl}_3$ )  $\delta$  47.5. HRMS (ESI-TOF)  $m/z$ :  $[\text{M} + \text{H}]^+$  calcd. for  $\text{C}_{31}\text{H}_{42}\text{O}_5\text{P}^+$  525.2764, found 525.2771. HPLC (Daicel CHIRALPAK<sup>®</sup> ID, isopropanol/n-hexane = 10/90, flow rate = 1.0 mL/min,  $\lambda = 220$  nm) tR = 13.4 min

(major), 15.3 min (minor).

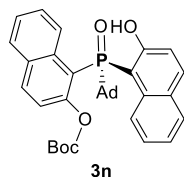

**1-((S)-(Adamantan-1-yl)(2-hydroxynaphthalen-1-yl)phosphoryl)naphthalen-2-yl tert-butyl carbonate (3n)**

Following the general procedure, **1n** (93.6 mg, 0.2 mmol) and **2** (70  $\mu$ L, 0.3 mmol) was reacted at -20  $^{\circ}$ C for 24 hours to give **3n** as a white solid, 18.2 mg, 16% yield, 99:1 er, mp: 107-108  $^{\circ}$ C, obtained by the purification with flash column chromatography on silica gel using petroleum ether/EtOAc (v/v) = 10/1 as eluent.

$^1\text{H}$  NMR (400 MHz,  $\text{CDCl}_3$ )  $\delta$  11.61 (s, 1H), 8.78 (d,  $J$  = 12.9 Hz, 1H), 8.21 (d,  $J$  = 14.2 Hz, 1H), 7.99 (d,  $J$  = 8.0 Hz, 1H), 7.83 (d,  $J$  = 8.0 Hz, 1H), 7.76 (dd,  $J$  = 11.8, 6.4 Hz, 2H), 7.66 (d,  $J$  = 8.3 Hz, 1H), 7.63 – 7.52 (m, 2H), 7.44 (t,  $J$  = 7.5 Hz, 1H), 7.28 (d,  $J$  = 8.0 Hz, 2H), 2.12 (d,  $J$  = 47.6 Hz, 9H), 1.75 (s, 6H), 1.51 (s, 9H).  $^{13}\text{C}$  NMR (101 MHz,  $\text{CDCl}_3$ )  $\delta$  159.9, 159.9, 150.7, 147.8, 147.7, 137.1, 137.0, 136.8, 136.8, 135.4, 135.4, 133.8, 133.7, 130.1, 130.0, 129.0, 128.9, 128.8, 128.1, 127.3, 126.7, 126.6, 126.2, 123.3, 121.7, 120.8, 120.3, 120.3, 114.0, 113.1, 112.0, 112.0, 84.3, 39.7, 39.0, 36.3, 35.2, 27.6, 27.6, 27.5.  $^{31}\text{P}$  NMR (162 MHz,  $\text{CDCl}_3$ )  $\delta$  47.0. HRMS (ESI-TOF)  $m/z$ : [ $\text{M} + \text{H}$ ] $^+$  calcd. for  $\text{C}_{35}\text{H}_{38}\text{O}_5\text{P}^+$  569.2451, found 569.2460. HPLC (Daicel CHIRALPAK<sup>®</sup> ID, isopropanol/n-hexane = 30/70, flow rate = 1.0 mL/min,  $\lambda$  = 220 nm) tR = 39.6 min (minor), 72.1 min (major).

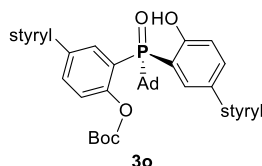

**2-((S)-(Adamantan-1-yl)(2-hydroxy-5-((E)-styryl)phenyl)phosphoryl)-4-((E)-styryl)phenyl tert-butyl carbonate (3o)**

Following the general procedure, **1o** (114.4 mg, 0.2 mmol) and **2** (70  $\mu$ L, 0.3 mmol) was reacted at -20  $^{\circ}$ C for 24 hours to give **3o** as a white solid, 57.8 mg, 43% yield, 88:12 er, mp: 142-144  $^{\circ}$ C, obtained by the purification with flash column chromatography on silica gel using petroleum ether/EtOAc (v/v) = 10/1 as eluent.

$^1\text{H}$  NMR (400 MHz,  $\text{CDCl}_3$ )  $\delta$  12.11 (s, 1H), 8.42 (dd,  $J$  = 12.2, 2.3 Hz, 1H), 7.87 – 7.76 (m, 3H), 7.62 (dd,  $J$  = 14.4, 7.2 Hz, 4H), 7.47 (q,  $J$  = 7.2 Hz, 5H), 7.43 – 7.34 (m, 4H), 7.19 – 7.06 (m, 2H), 7.06 – 7.03 (m, 1H), 2.21 (d,  $J$  = 5.6 Hz, 9H), 1.88 (s, 6H), 1.63 (s, 9H).  $^{13}\text{C}$  NMR (101 MHz,  $\text{CDCl}_3$ )  $\delta$  164.6, 164.5, 150.8, 150.6, 137.4, 136.7, 134.9, 134.8, 132.6, 132.6, 130.9, 130.7, 130.6, 130.2, 128.7, 128.6, 128.2, 128.0, 127.9, 127.8, 127.3, 126.8, 126.6, 126.3, 123.4, 123.3, 122.6, 119.2, 119.1, 84.6, 39.5, 38.8, 36.3, 35.0, 27.6, 27.5.  $^{31}\text{P}$  NMR (162 MHz,  $\text{CDCl}_3$ )  $\delta$  48.0. HRMS (ESI-TOF)  $m/z$ : [ $\text{M} + \text{H}$ ] $^+$  calcd. for  $\text{C}_{43}\text{H}_{46}\text{O}_5\text{P}^+$  673.3077, found 673.3095. HPLC (Daicel CHIRALPAK<sup>®</sup>

ID, isopropanol/n-hexane = 10/90, flow rate = 1.0 mL/min,  $\lambda$  = 220 nm) tR = 27.0 min (major), 32.8 min (minor).

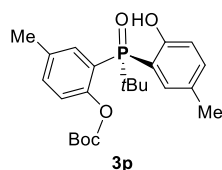

**(S)-tert-Butyl (2-(tert-butyl(2-hydroxy-5-methylphenyl)phosphoryl)-4-methylphenyl) carbonate (3p)**

Following the general procedure, **1p** (63.6 mg, 0.2 mmol) and **2** (70  $\mu$ L, 0.3 mmol) was reacted at -20 °C for 24 hours to give **3p** as a white solid, 36.1 mg, 43% yield, 91:9 er, mp: 150-151 °C, obtained by the purification with flash column chromatography on silica gel using petroleum ether/EtOAc (v/v) = 10/1 as eluent.

$^1\text{H}$  NMR (400 MHz,  $\text{CDCl}_3$ )  $\delta$  11.52 (s, 1H), 7.87 (dd,  $J$  = 11.8, 2.9 Hz, 1H), 7.35 (d,  $J$  = 9.1 Hz, 1H), 7.25 (d,  $J$  = 12.4 Hz, 1H), 7.17 (dd,  $J$  = 8.4, 4.8 Hz, 2H), 6.80 (dd,  $J$  = 8.5, 4.6 Hz, 1H), 2.40 (s, 3H), 2.25 (s, 3H), 1.50 (s, 9H), 1.34 (d,  $J$  = 15.9 Hz, 9H).  $^{13}\text{C}$  NMR (101 MHz,  $\text{CDCl}_3$ )  $\delta$  162.2, 162.2, 150.8, 149.9, 149.9, 135.2, 135.1, 134.7, 134.7, 134.2, 134.1, 134.0, 134.0, 131.2, 131.1, 127.1, 127.0, 123.2, 123.1, 122.8, 122.0, 118.2, 118.1, 110.6, 109.7, 84.0, 36.1, 35.4, 27.6, 25.1, 20.9, 20.6.  $^{31}\text{P}$  NMR (162 MHz,  $\text{CDCl}_3$ )  $\delta$  52.1. HRMS (ESI-TOF)  $m/z$ :  $[\text{M} + \text{H}]^+$  calcd. for  $\text{C}_{23}\text{H}_{32}\text{O}_5\text{P}^+$  419.1982, found 419.1978. HPLC (Daicel CHIRALPAK<sup>®</sup> IA, isopropanol/n-hexane = 10/90, flow rate = 1.0 mL/min,  $\lambda$  = 220 nm) tR = 5.1 min (minor), 5.8 min (major).

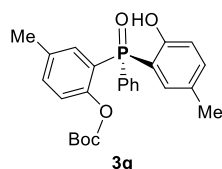

**(S)-tert-Butyl (2-((2-hydroxy-5-methylphenyl)(phenyl)phosphoryl)-4-methylphenyl) carbonate (3q)**

Following the general procedure, **1q** (67.6 mg, 0.2 mmol) and **2** (70  $\mu$ L, 0.3 mmol) was reacted at -20 °C for 24 hours to give **3q** as a yellow oil, 38.4 mg, 44% yield, 90:10 er, obtained by the purification with flash column chromatography on silica gel using petroleum ether/acetone (v/v) = 5/1 as eluent.

$^1\text{H}$  NMR (400 MHz,  $\text{CDCl}_3$ )  $\delta$  11.00 (s, 1H), 7.68 (dd,  $J$  = 13.0, 7.0 Hz, 2H), 7.61 – 7.53 (m, 2H), 7.51 – 7.44 (m, 2H), 7.41 (d,  $J$  = 8.4 Hz, 1H), 7.24 – 7.16 (m, 2H), 7.07 (d,  $J$  = 14.3 Hz, 1H), 6.87 (dd,  $J$  = 8.4, 5.1 Hz, 1H), 2.36 (s, 3H), 2.20 (s, 3H), 1.31 (s, 9H).  $^{13}\text{C}$  NMR (101 MHz,  $\text{CDCl}_3$ )  $\delta$  161.9, 161.9, 150.3, 150.0, 150.0, 135.7, 135.6, 135.3, 135.3, 134.7, 134.7, 134.4, 134.3, 132.4, 132.4, 132.3, 132.0, 131.9, 131.4, 131.3, 128.7, 128.6, 127.9, 127.8, 123.8, 123.0, 123.0, 122.8, 118.2, 118.2, 110.7, 109.7, 83.6, 27.4, 20.9, 20.5.  $^{31}\text{P}$  NMR (162 MHz,  $\text{CDCl}_3$ )  $\delta$  36.9. HRMS (ESI-TOF)  $m/z$ :  $[\text{M} + \text{H}]^+$  calcd. for  $\text{C}_{25}\text{H}_{28}\text{O}_5\text{P}^+$  439.1669, found 439.1664. HPLC (Daicel CHIRALPAK<sup>®</sup> IA, isopropanol/n-hexane = 20/80, flow rate = 1.0 mL/min,  $\lambda$  = 220 nm) tR = 6.7 min

(minor), 7.8 min (major).

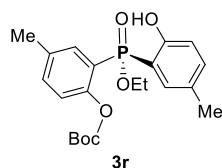

**(R)-tert-Butyl (2-(ethoxy(2-hydroxy-5-methylphenyl)phosphoryl)-4-methylphenyl) carbonate (3r)**

Following the general procedure, **1r** (61.2 mg, 0.2 mmol) and **2** (70  $\mu$ L, 0.3 mmol) was reacted at -20 °C for 24 hours to give **3r** as a white solid, 36.9 mg, 45% yield, 92:8 er, mp: 112-113 °C, obtained by the purification with flash column chromatography on silica gel using petroleum ether/acetone (v/v) = 5/1 as eluent.

$^1\text{H}$  NMR (400 MHz,  $\text{CDCl}_3$ )  $\delta$  10.59 (s, 1H), 7.75 (dd,  $J$  = 13.0, 2.2 Hz, 1H), 7.37 (dd,  $J$  = 8.4, 2.2 Hz, 1H), 7.19 (dd,  $J$  = 8.5, 2.2 Hz, 1H), 7.14 – 7.06 (m, 2H), 6.85 (dd,  $J$  = 8.5, 6.0 Hz, 1H), 4.29 – 4.16 (m, 1H), 4.12 – 3.99 (m, 1H), 2.40 (s, 3H), 2.20 (s, 3H), 1.52 (s, 9H), 1.38 (t,  $J$  = 7.1 Hz, 3H).  $^{13}\text{C}$  NMR (101 MHz,  $\text{CDCl}_3$ )  $\delta$  160.8, 160.7, 151.1, 150.3, 150.3, 135.8, 135.8, 135.7, 135.6, 134.7, 134.7, 133.4, 133.3, 131.3, 131.2, 128.3, 128.2, 124.0, 123.3, 123.2, 122.6, 117.6, 117.5, 111.6, 110.3, 83.7, 61.6, 61.6, 27.6, 20.8, 20.3, 16.4, 16.3.  $^{31}\text{P}$  NMR (162 MHz,  $\text{CDCl}_3$ )  $\delta$  35.7. HRMS (ESI-TOF)  $m/z$ :  $[\text{M} + \text{H}]^+$  calcd. for  $\text{C}_{21}\text{H}_{28}\text{O}_6\text{P}^+$  407.1618, found 407.1620. HPLC (Daicel CHIRALPAK<sup>®</sup> ID, isopropanol/n-hexane = 20/80, flow rate = 1.0 mL/min,  $\lambda$  = 220 nm) tR = 8.0 min (major), 8.7 min (minor).

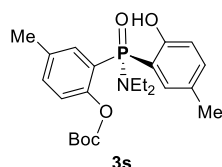

**(S)-tert-Butyl (2-((diethylamino)(2-hydroxy-5-methylphenyl)phosphoryl)-4-methylphenyl) carbonate (3s)**

Following the general procedure, **1s** (66.6 mg, 0.2 mmol) and **2** (70  $\mu$ L, 0.3 mmol) was reacted at -20 °C for 24 hours to give **3s** as a white solid, 61.9 mg, 71% yield, 91.5:8.5 er, mp: 105-107 °C, obtained by the purification with flash column chromatography on silica gel using petroleum ether/EtOAc (v/v) = 10/1 as eluent.

$^1\text{H}$  NMR (400 MHz,  $\text{CDCl}_3$ )  $\delta$  11.39 (br, 1H), 7.98 – 7.86 (m, 1H), 7.55 (d,  $J$  = 14.2 Hz, 1H), 7.34 (d,  $J$  = 8.3 Hz, 1H), 7.15 (dd,  $J$  = 8.4, 5.3 Hz, 2H), 6.78 (dd,  $J$  = 8.7, 5.6 Hz, 1H), 3.11 (ddt,  $J$  = 27.5, 14.1, 7.2 Hz, 4H), 2.38 (s, 3H), 2.27 (s, 3H), 1.58 (s, 9H), 1.14 (t,  $J$  = 7.0 Hz, 6H).  $^{13}\text{C}$  NMR (101 MHz,  $\text{CDCl}_3$ )  $\delta$  161.7, 161.6, 150.9, 149.1, 135.9, 135.8, 135.7, 135.6, 135.3, 135.2, 134.2, 134.2, 132.7, 132.6, 127.5, 127.3, 123.1, 122.6, 122.5, 121.8, 117.6, 117.5, 111.4, 110.1, 83.7, 38.9, 38.8, 27.7, 20.8, 20.4, 13.7, 13.7.  $^{31}\text{P}$  NMR (162 MHz,  $\text{CDCl}_3$ )  $\delta$  36.7. HRMS (ESI-TOF)  $m/z$ :  $[\text{M} + \text{H}]^+$  calcd. for  $\text{C}_{23}\text{H}_{33}\text{NO}_5\text{P}^+$  434.2091, found 434.2097. HPLC (Daicel CHIRALPAK<sup>®</sup> ID, isopropanol/n-hexane = 10/90, flow rate = 1.0 mL/min,  $\lambda$  = 220 nm) tR = 12.7 min

(major), 13.8 min (minor).

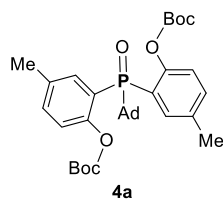

**(Adamantan-1-yl)phosphoryl bis(4-methyl-2,1-phenylene) di-tert-butyl bis(carbonate) (4a)**

Following the above procedure, racemic **3a** (99.2 mg, 0.2 mmol) and **2** (23  $\mu$ L, 0.1 mmol) was reacted at -20  $^{\circ}$ C for 24 hours to give **4a** as a white solid, 56.9 mg, 48% yield, mp: 182-184  $^{\circ}$ C, obtained by the purification with flash column chromatography on silica gel using petroleum ether/EtOAc (v/v) = 10/1 as eluent.

$^1\text{H}$  NMR (400 MHz,  $\text{CDCl}_3$ )  $\delta$  7.71 (d,  $J$  = 11.9 Hz, 2H), 7.29 (d,  $J$  = 8.2 Hz, 2H), 7.14 (dd,  $J$  = 8.3, 4.5 Hz, 2H), 2.34 (s, 6H), 2.07 (d,  $J$  = 51.0 Hz, 9H), 1.76 (q,  $J$  = 11.7 Hz, 6H), 1.42 (s, 18H).  $^{13}\text{C}$  NMR (101 MHz,  $\text{CDCl}_3$ )  $\delta$  150.8, 149.6, 134.8, 134.7, 134.2, 134.1, 133.0, 133.0, 124.4, 123.5, 122.5, 122.4, 83.0, 38.7, 37.9, 36.5, 35.8, 28.2, 28.1, 27.6, 20.9.  $^{31}\text{P}$  NMR (162 MHz,  $\text{CDCl}_3$ )  $\delta$  38.9. HRMS (ESI-TOF)  $m/z$ :  $[\text{M} + \text{H}]^+$  calcd. for  $\text{C}_{34}\text{H}_{46}\text{O}_7\text{P}^+$  597.2976, found 597.2978.

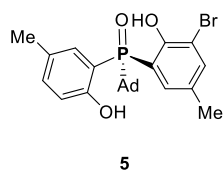

**(R)-(Adamantan-1-yl)(3-bromo-2-hydroxy-5-methylphenyl)(2-hydroxy-5-methylphenyl)phosphine oxide (5)<sup>1a,b</sup>**

Following the above procedure, **SI** (56.0 mg, 0.097 mmol) and trifluoroacetic acid (97  $\mu$ L, 1.26 mmol) was reacted at 25  $^{\circ}$ C for 12 hours to give **5** as a white solid, 33.1 mg, 72% yield, 97.5:2.5 er, mp: 187-189  $^{\circ}$ C, obtained by the purification with flash column chromatography on silica gel using petroleum ether/EtOAc (v/v) = 10/1 as eluent.

$^1\text{H}$  NMR (400 MHz,  $\text{CDCl}_3$ )  $\delta$  11.79 (s, 1H), 7.53 (d,  $J$  = 1.9 Hz, 1H), 7.24 (dd,  $J$  = 8.5, 2.0 Hz, 1H), 7.16 (td,  $J$  = 11.5, 2.1 Hz, 2H), 6.85 (dd,  $J$  = 8.5, 4.7 Hz, 1H), 2.31 (s, 3H), 2.30 (s, 3H), 2.08 – 1.97 (m, 9H), 1.78 – 1.68 (m, 6H).  $^{13}\text{C}$  NMR (101 MHz,  $\text{CDCl}_3$ )  $\delta$  158.4, 158.4, 150.6, 149.6, 149.6, 137.7, 137.7, 135.3, 135.2, 134.5, 134.5, 134.1, 134.1, 130.8, 130.7, 128.2, 128.1, 122.9, 122.8, 121.6, 120.8, 111.9, 111.8, 111.4, 110.5, 84.2, 39.4, 38.7, 36.2, 34.9, 27.6, 27.5, 27.4, 20.9, 20.4.  $^{31}\text{P}$  NMR (162 MHz,  $\text{CDCl}_3$ )  $\delta$  47.8. HPLC (Daicel CHIRALPAK<sup>®</sup> ID, isopropanol/n-hexane = 10/90, flow rate = 1.0 mL/min,  $\lambda$  = 220 nm) tR = 11.0 min (minor), 14.7 min (major).

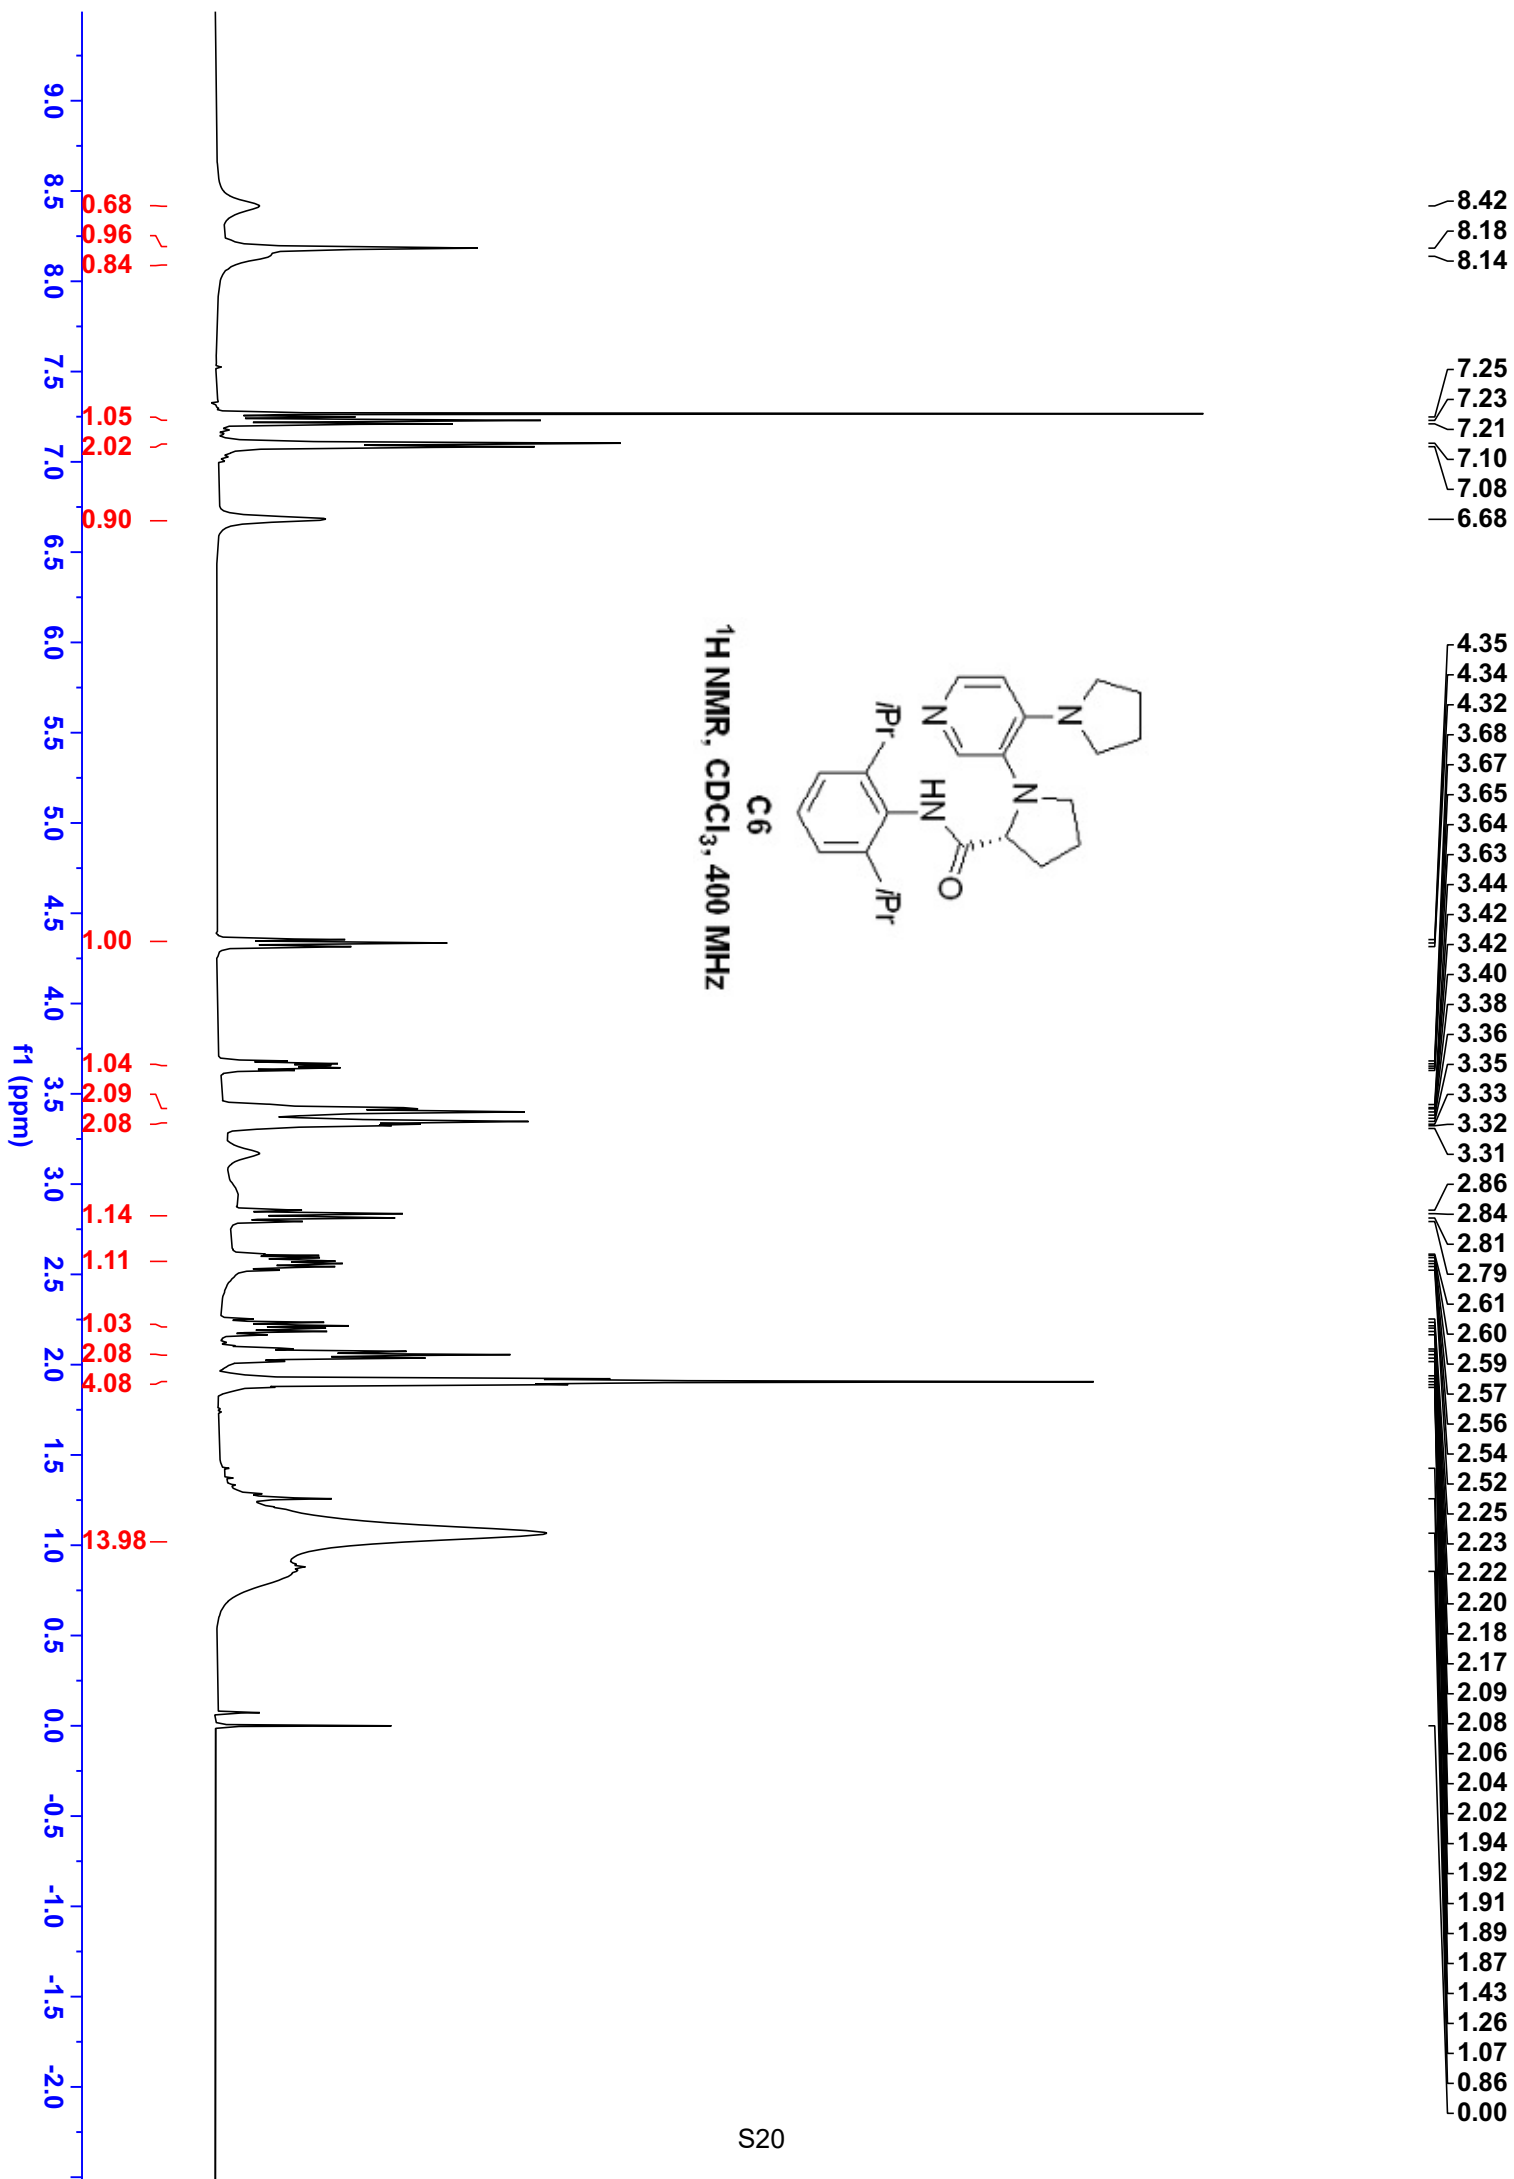

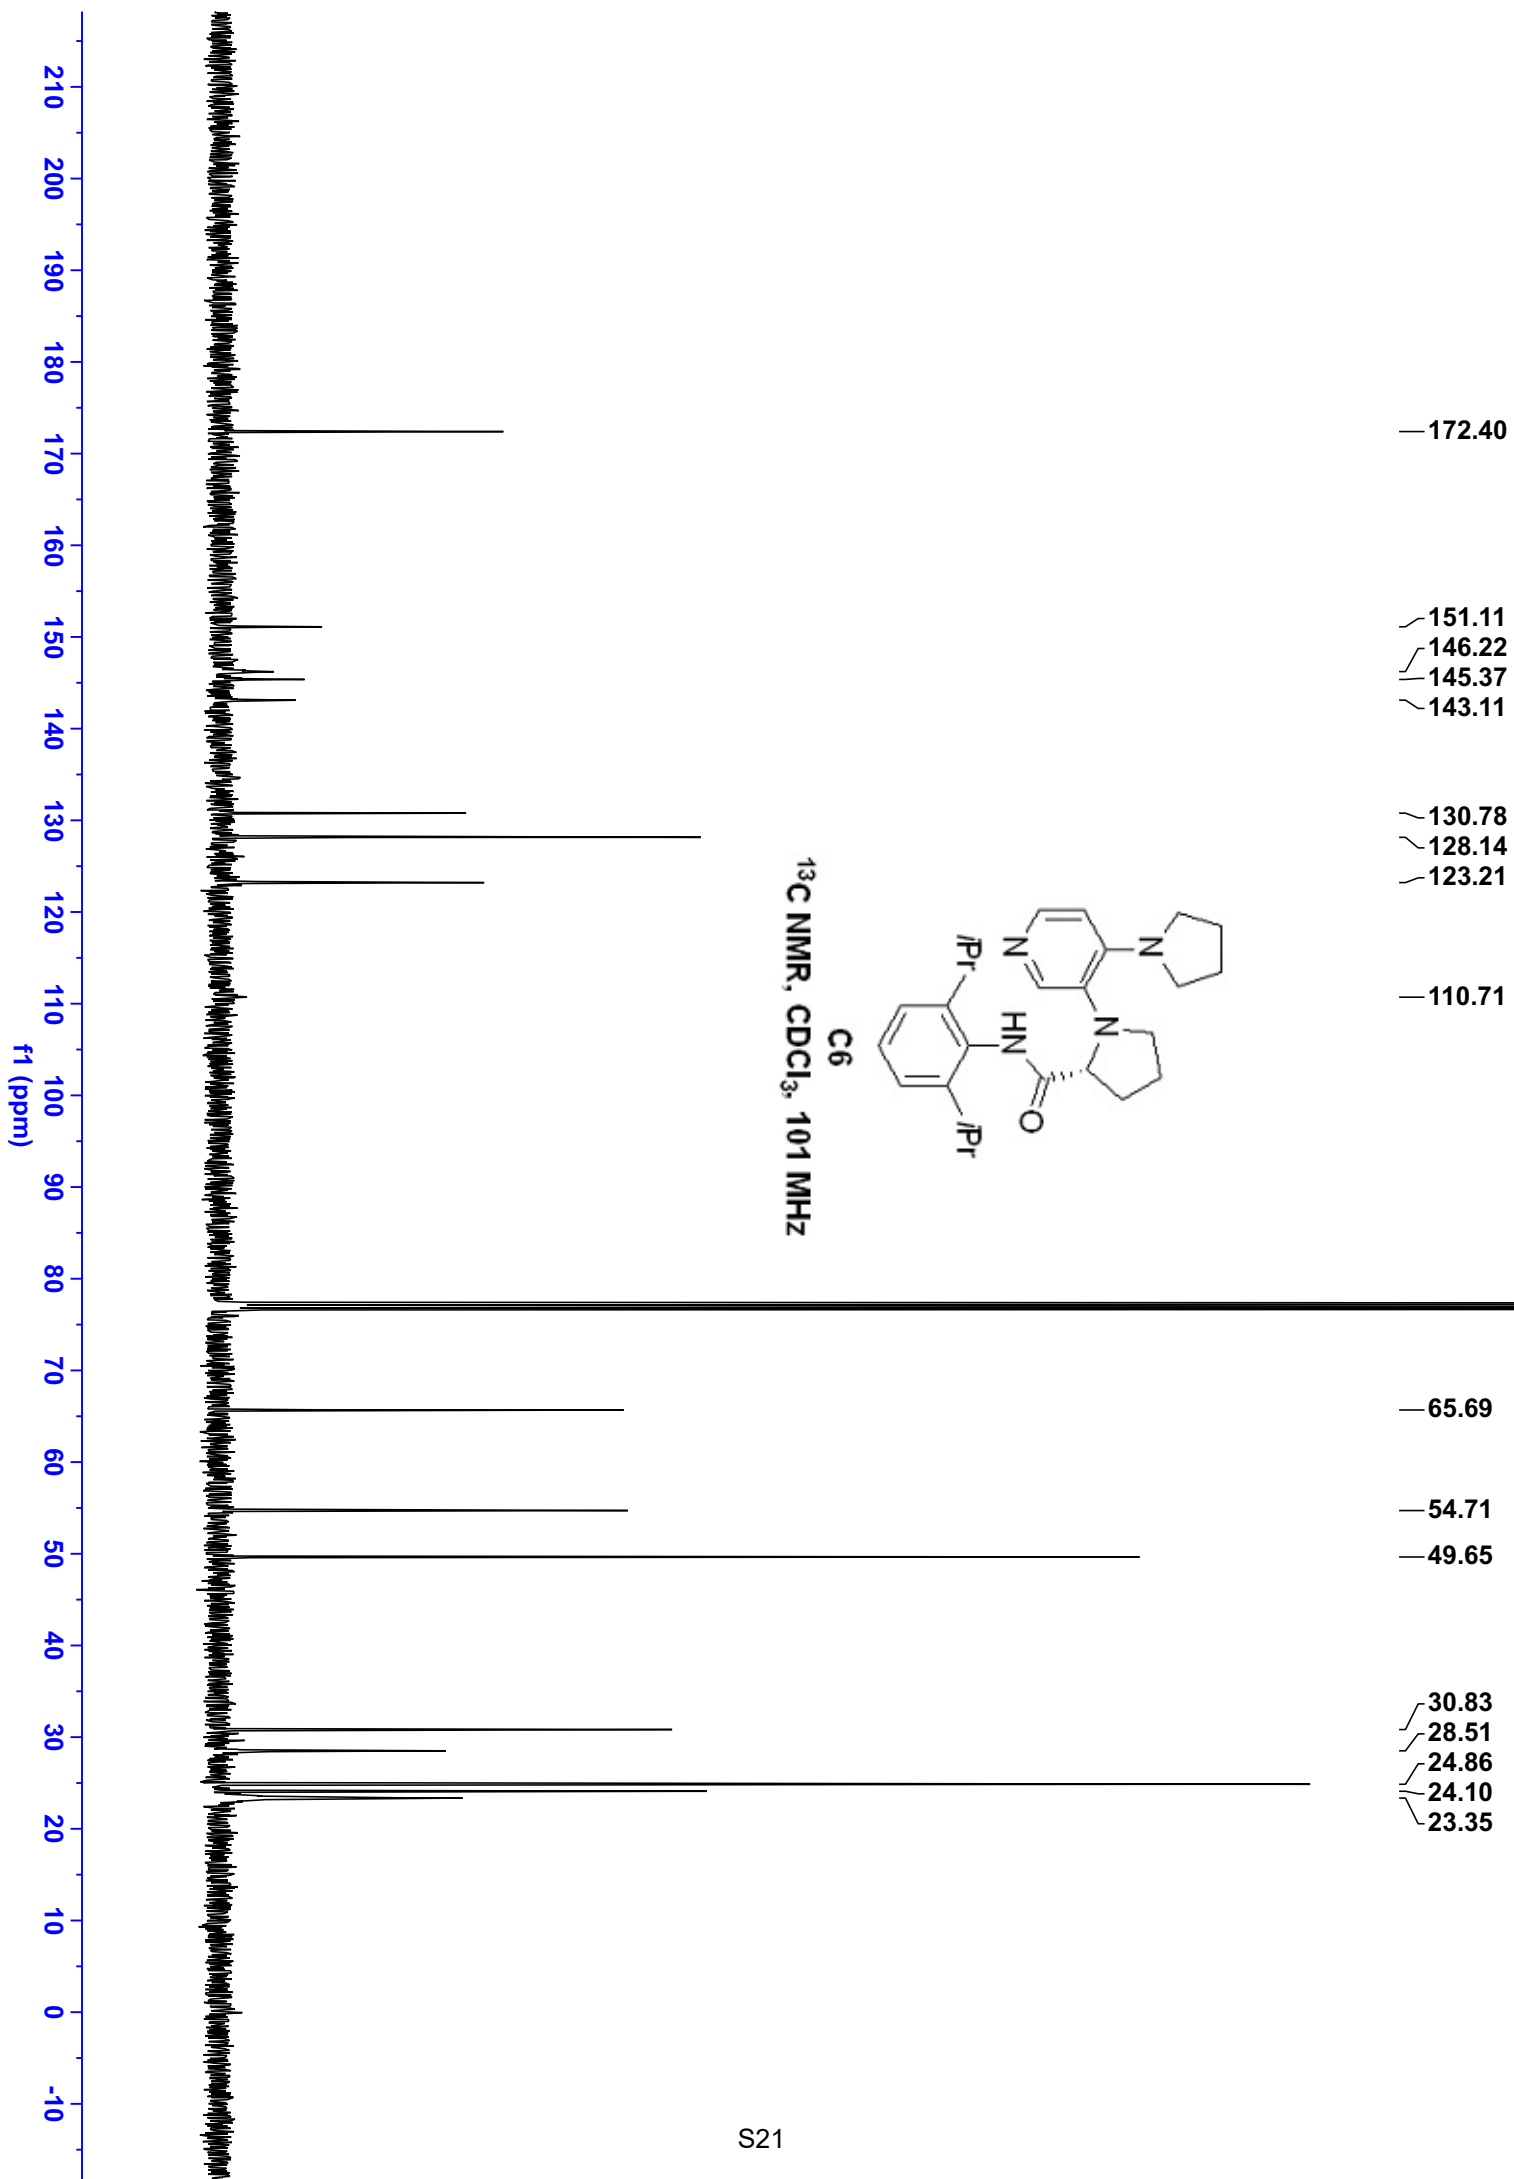

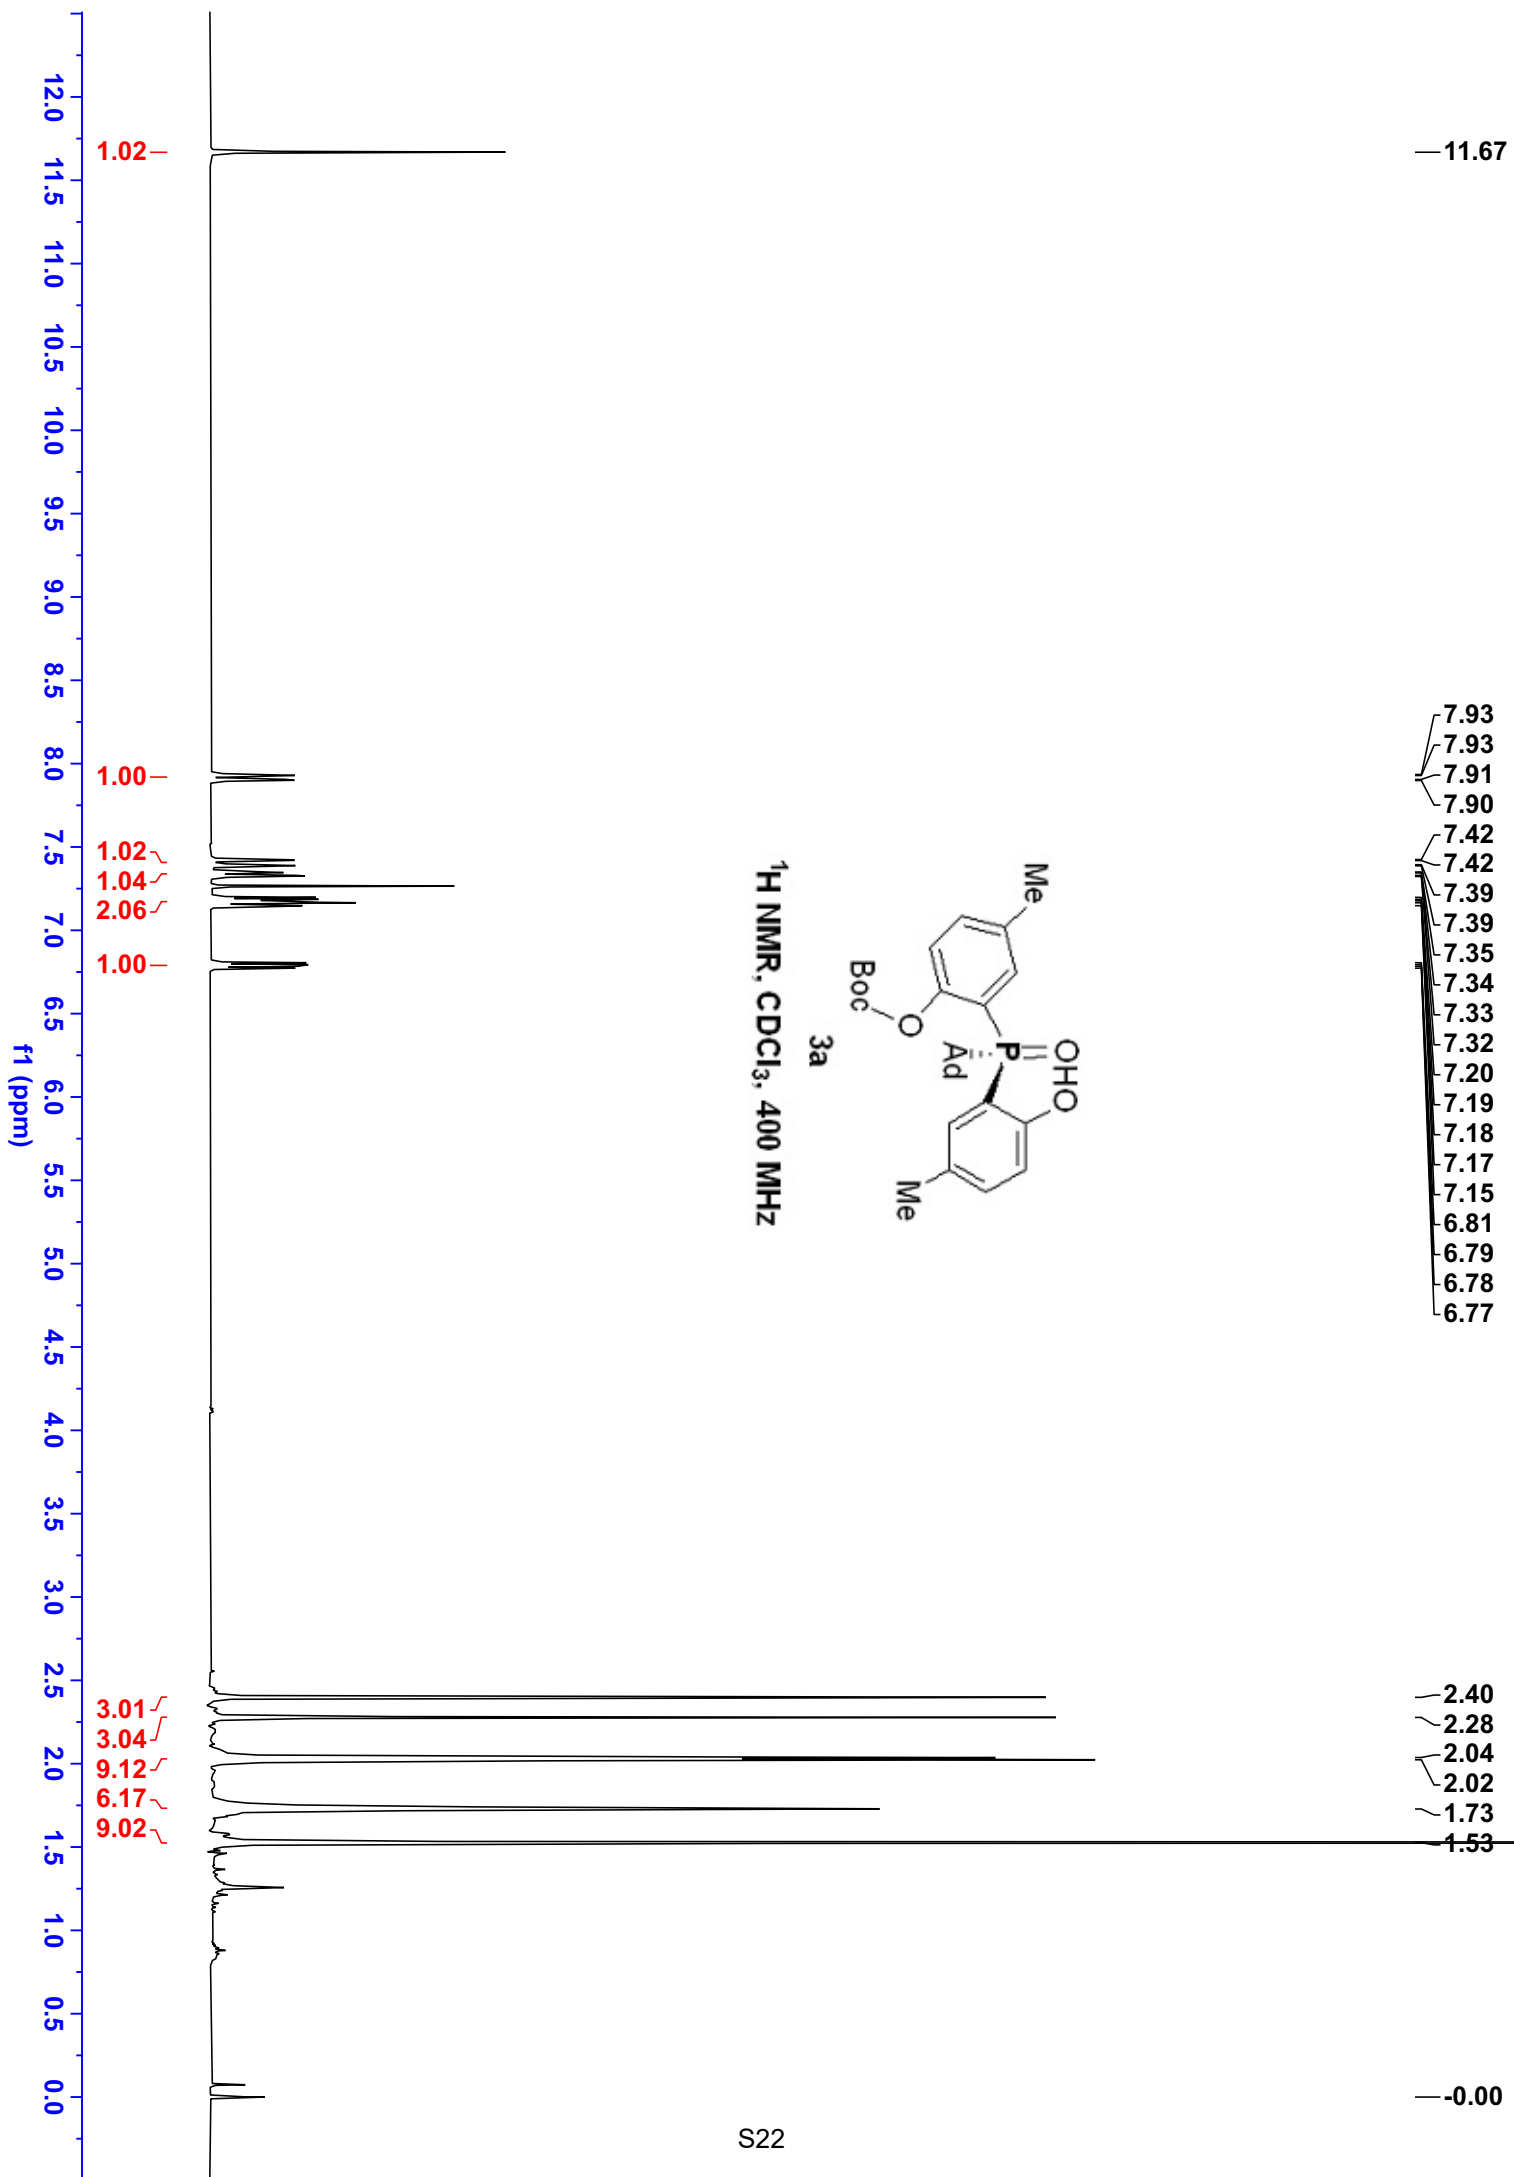

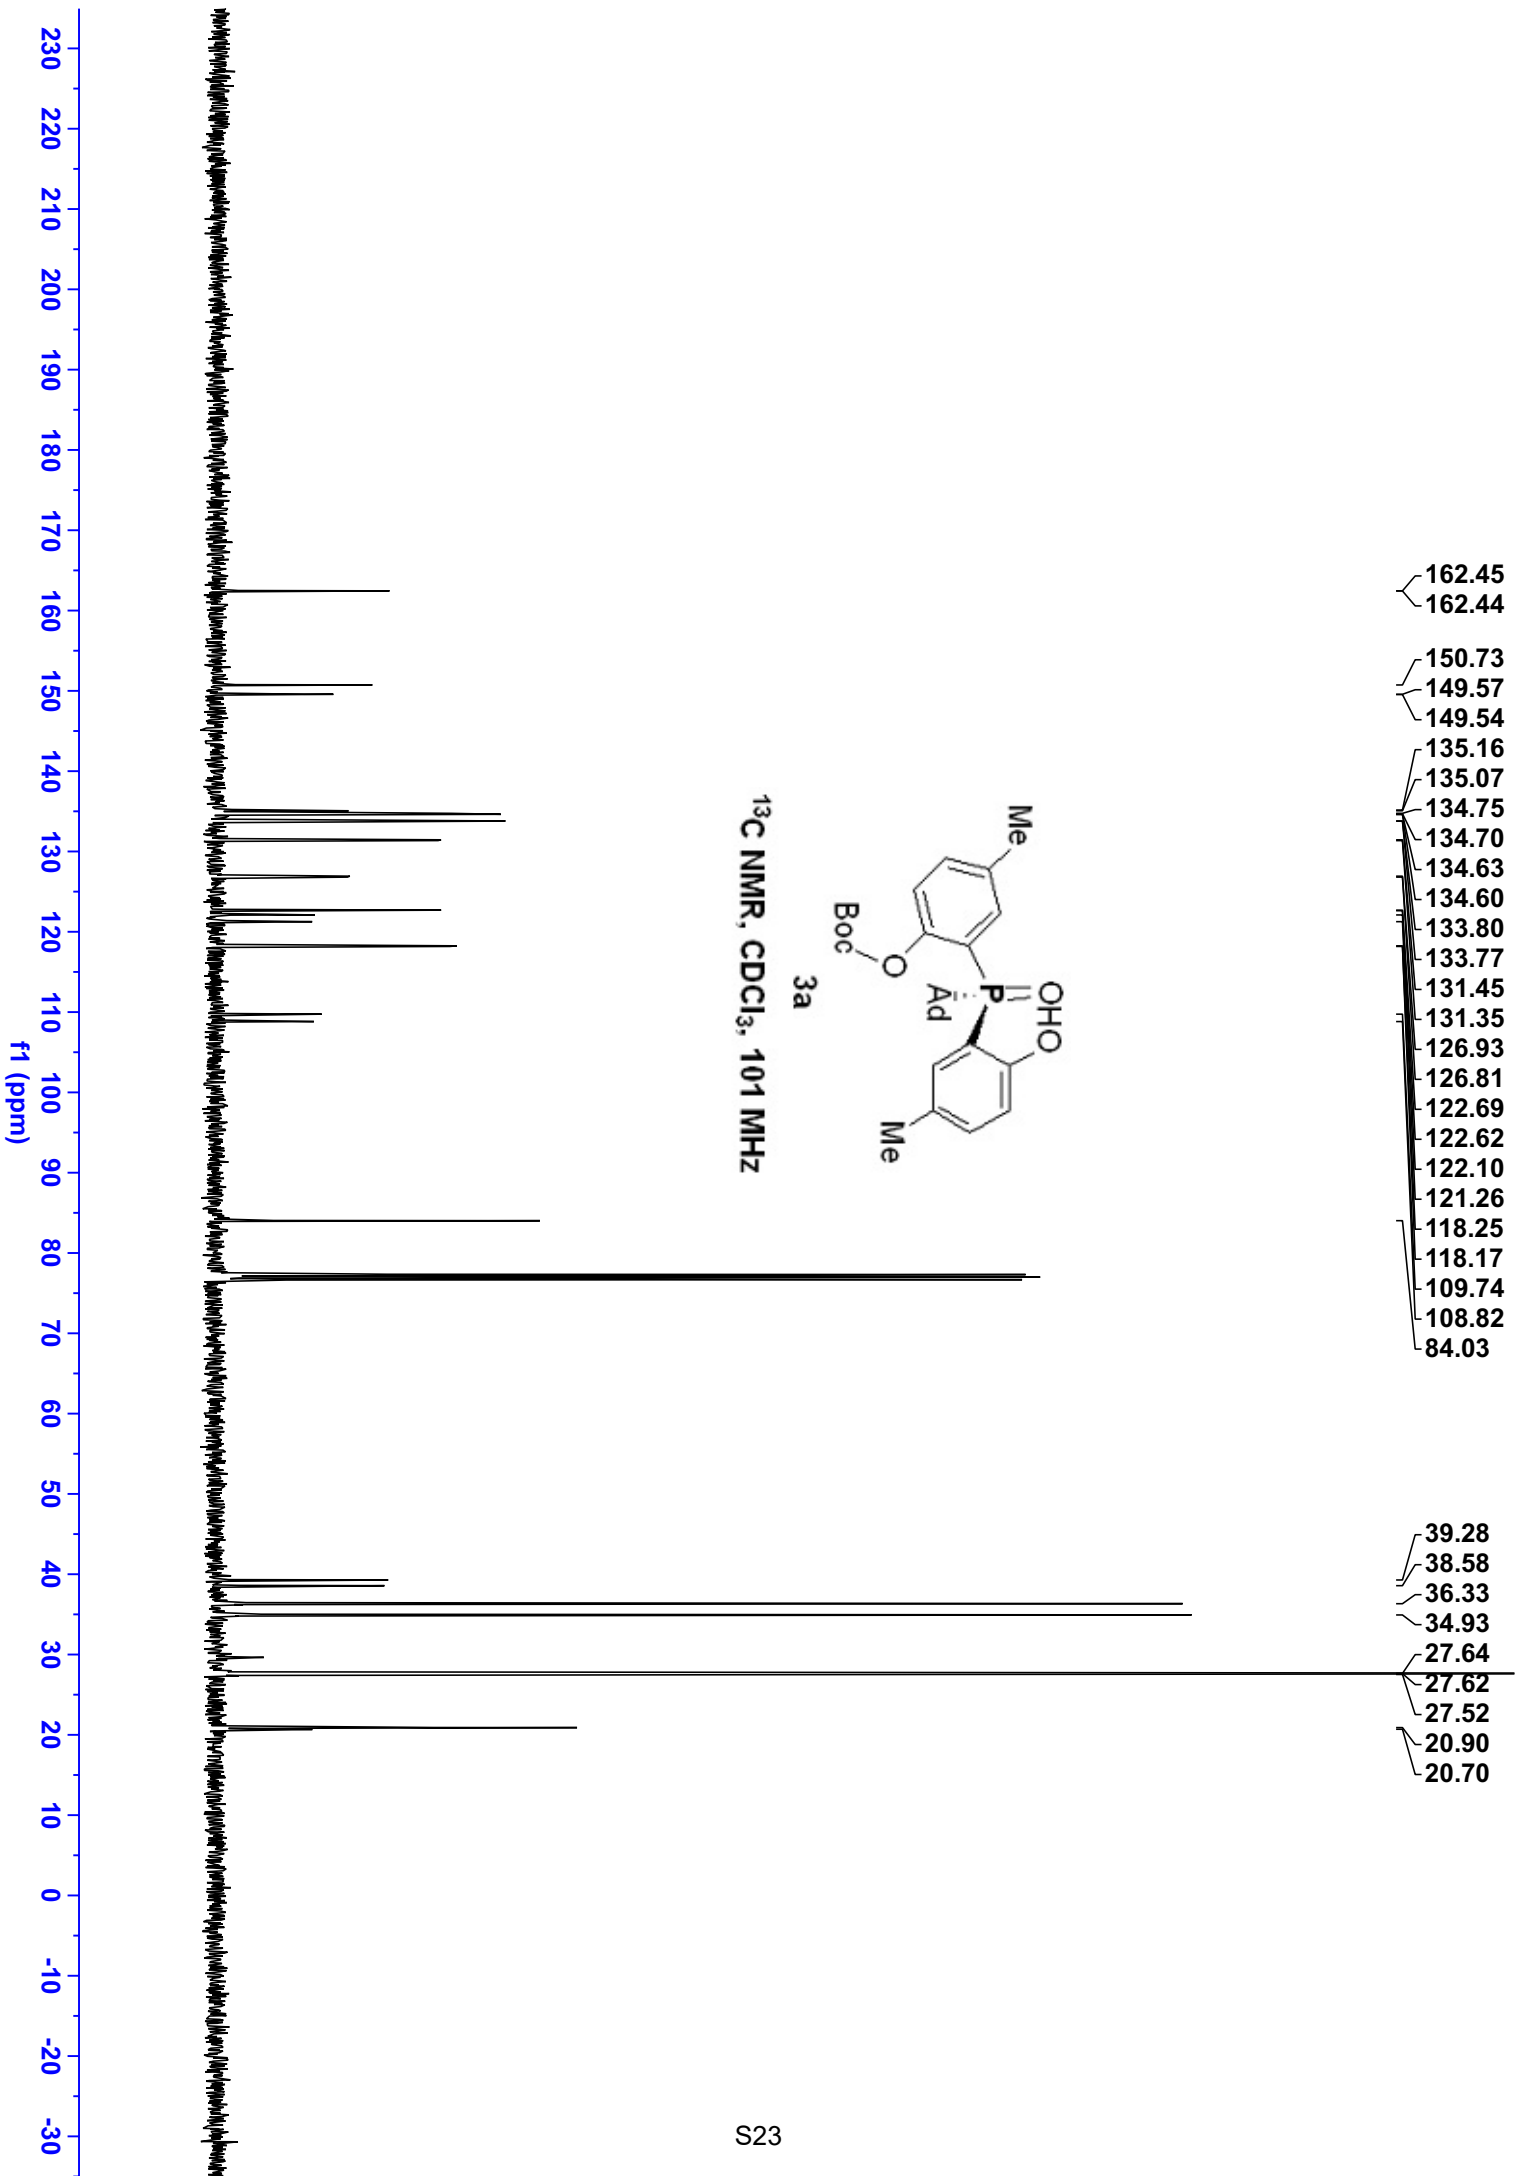

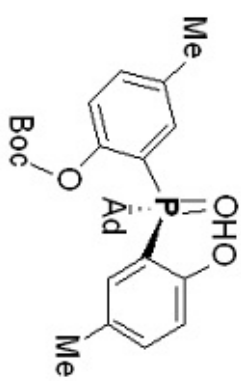

**<sup>31</sup>P NMR, CDCl<sub>3</sub>, 162 MHz**

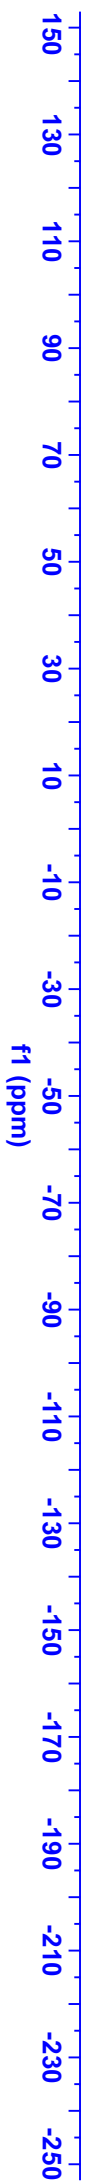

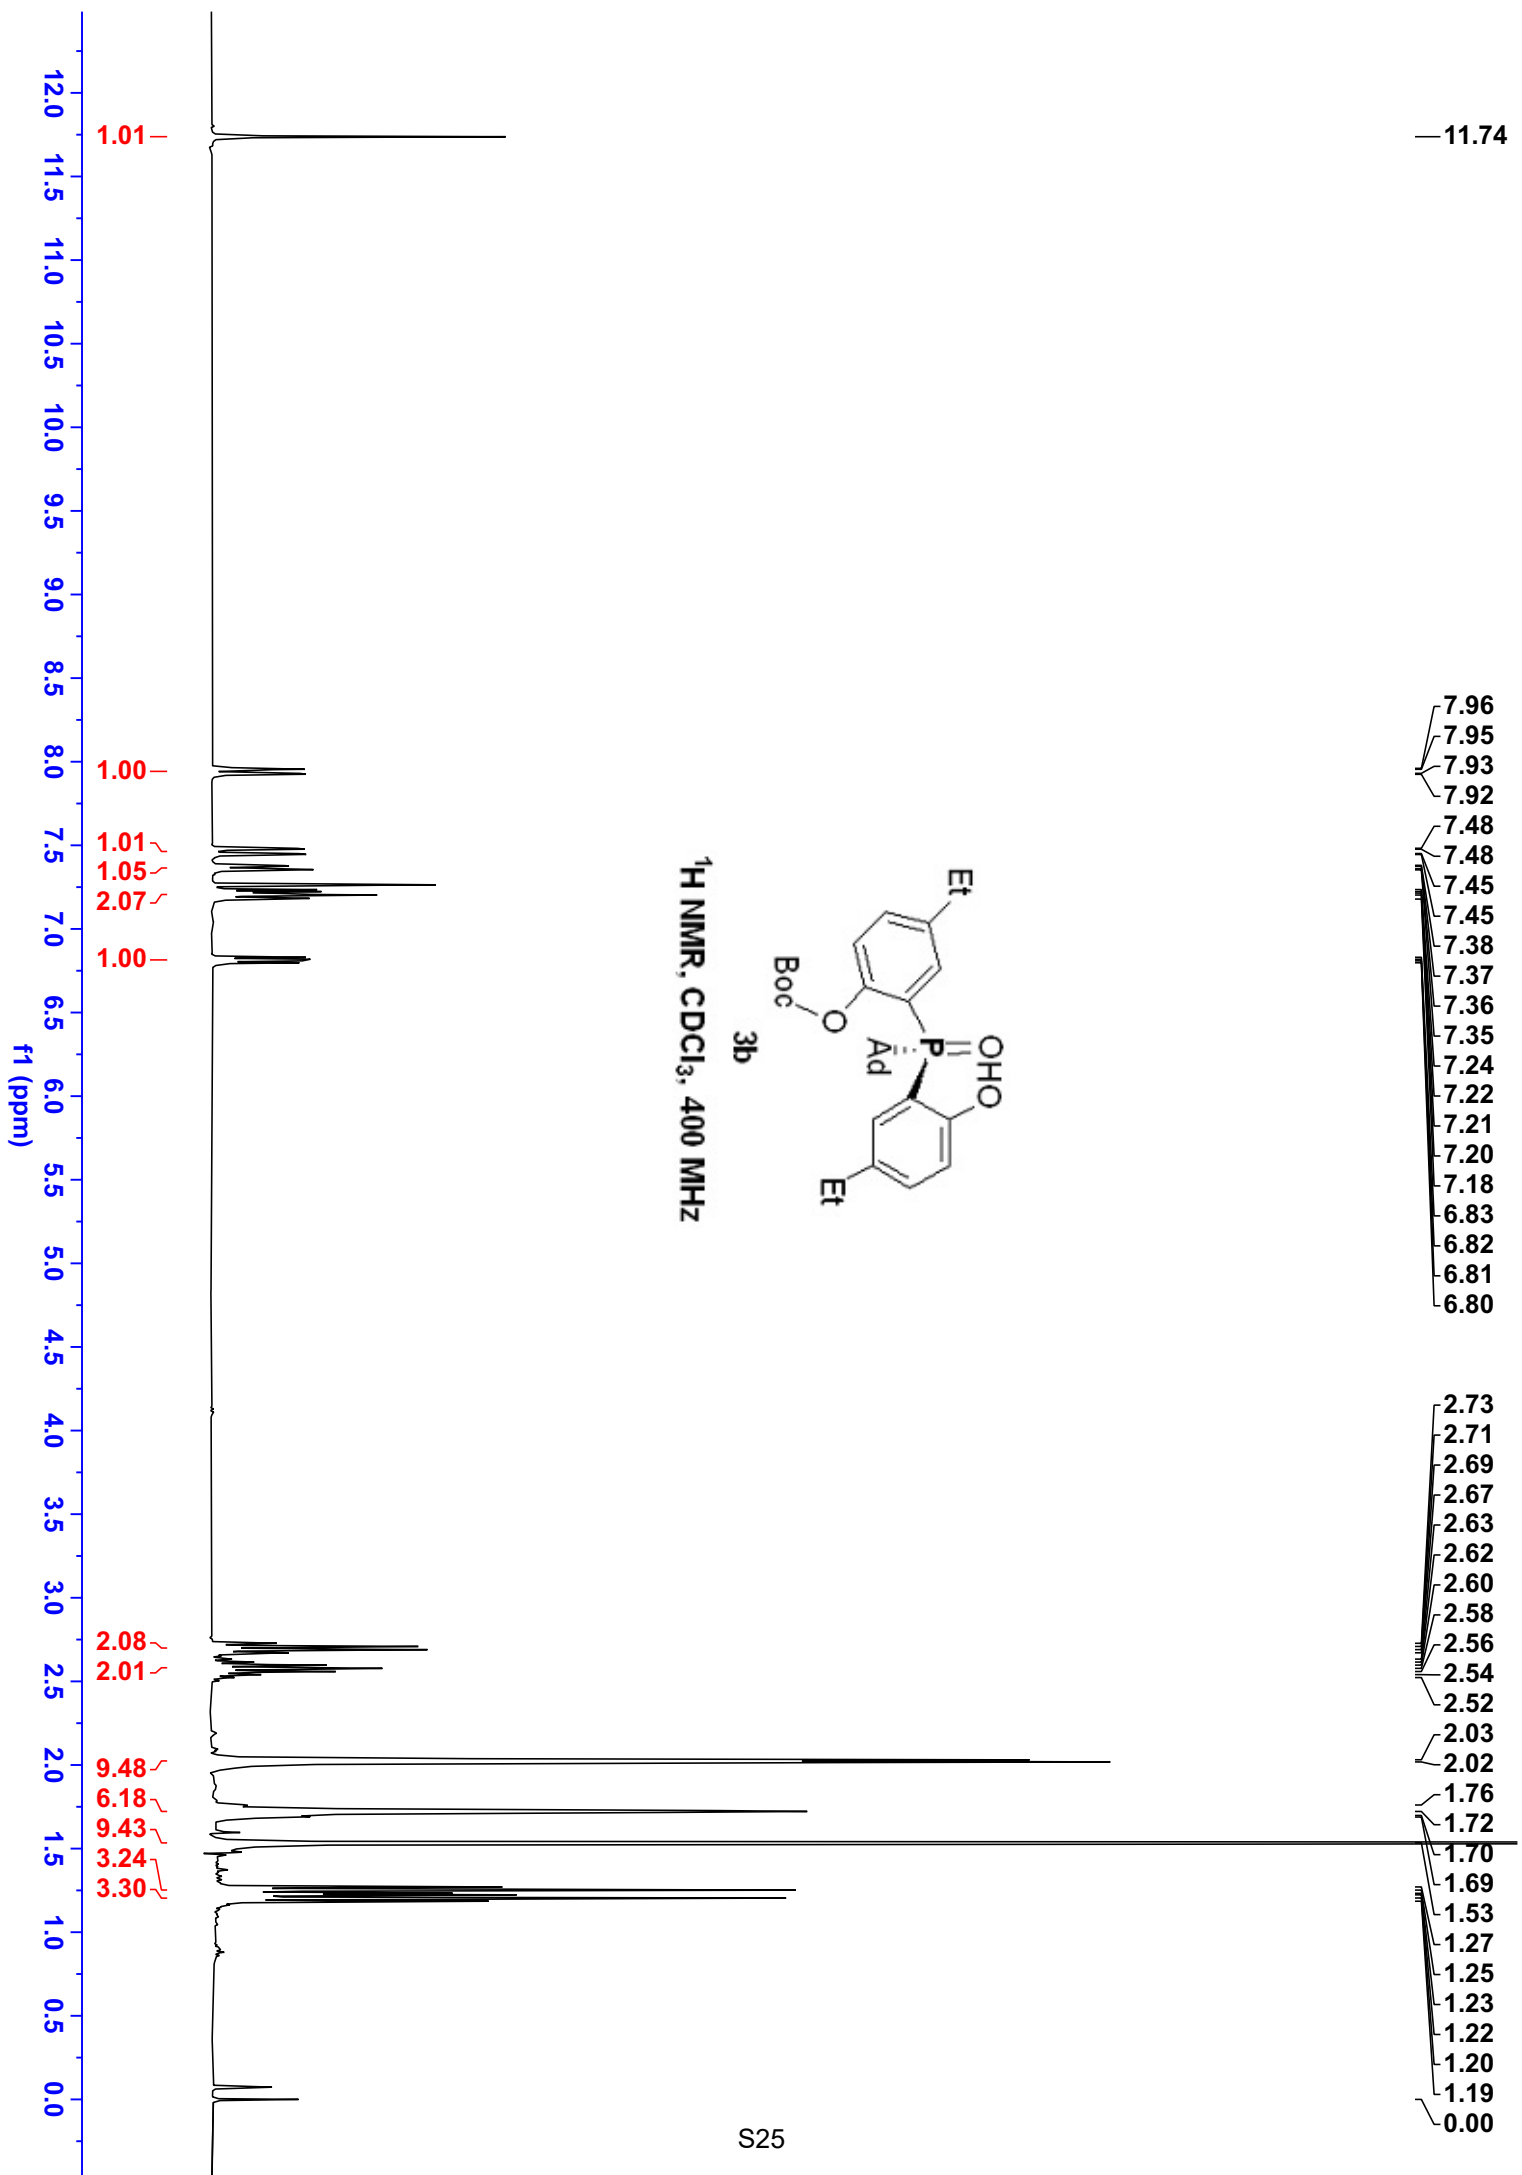

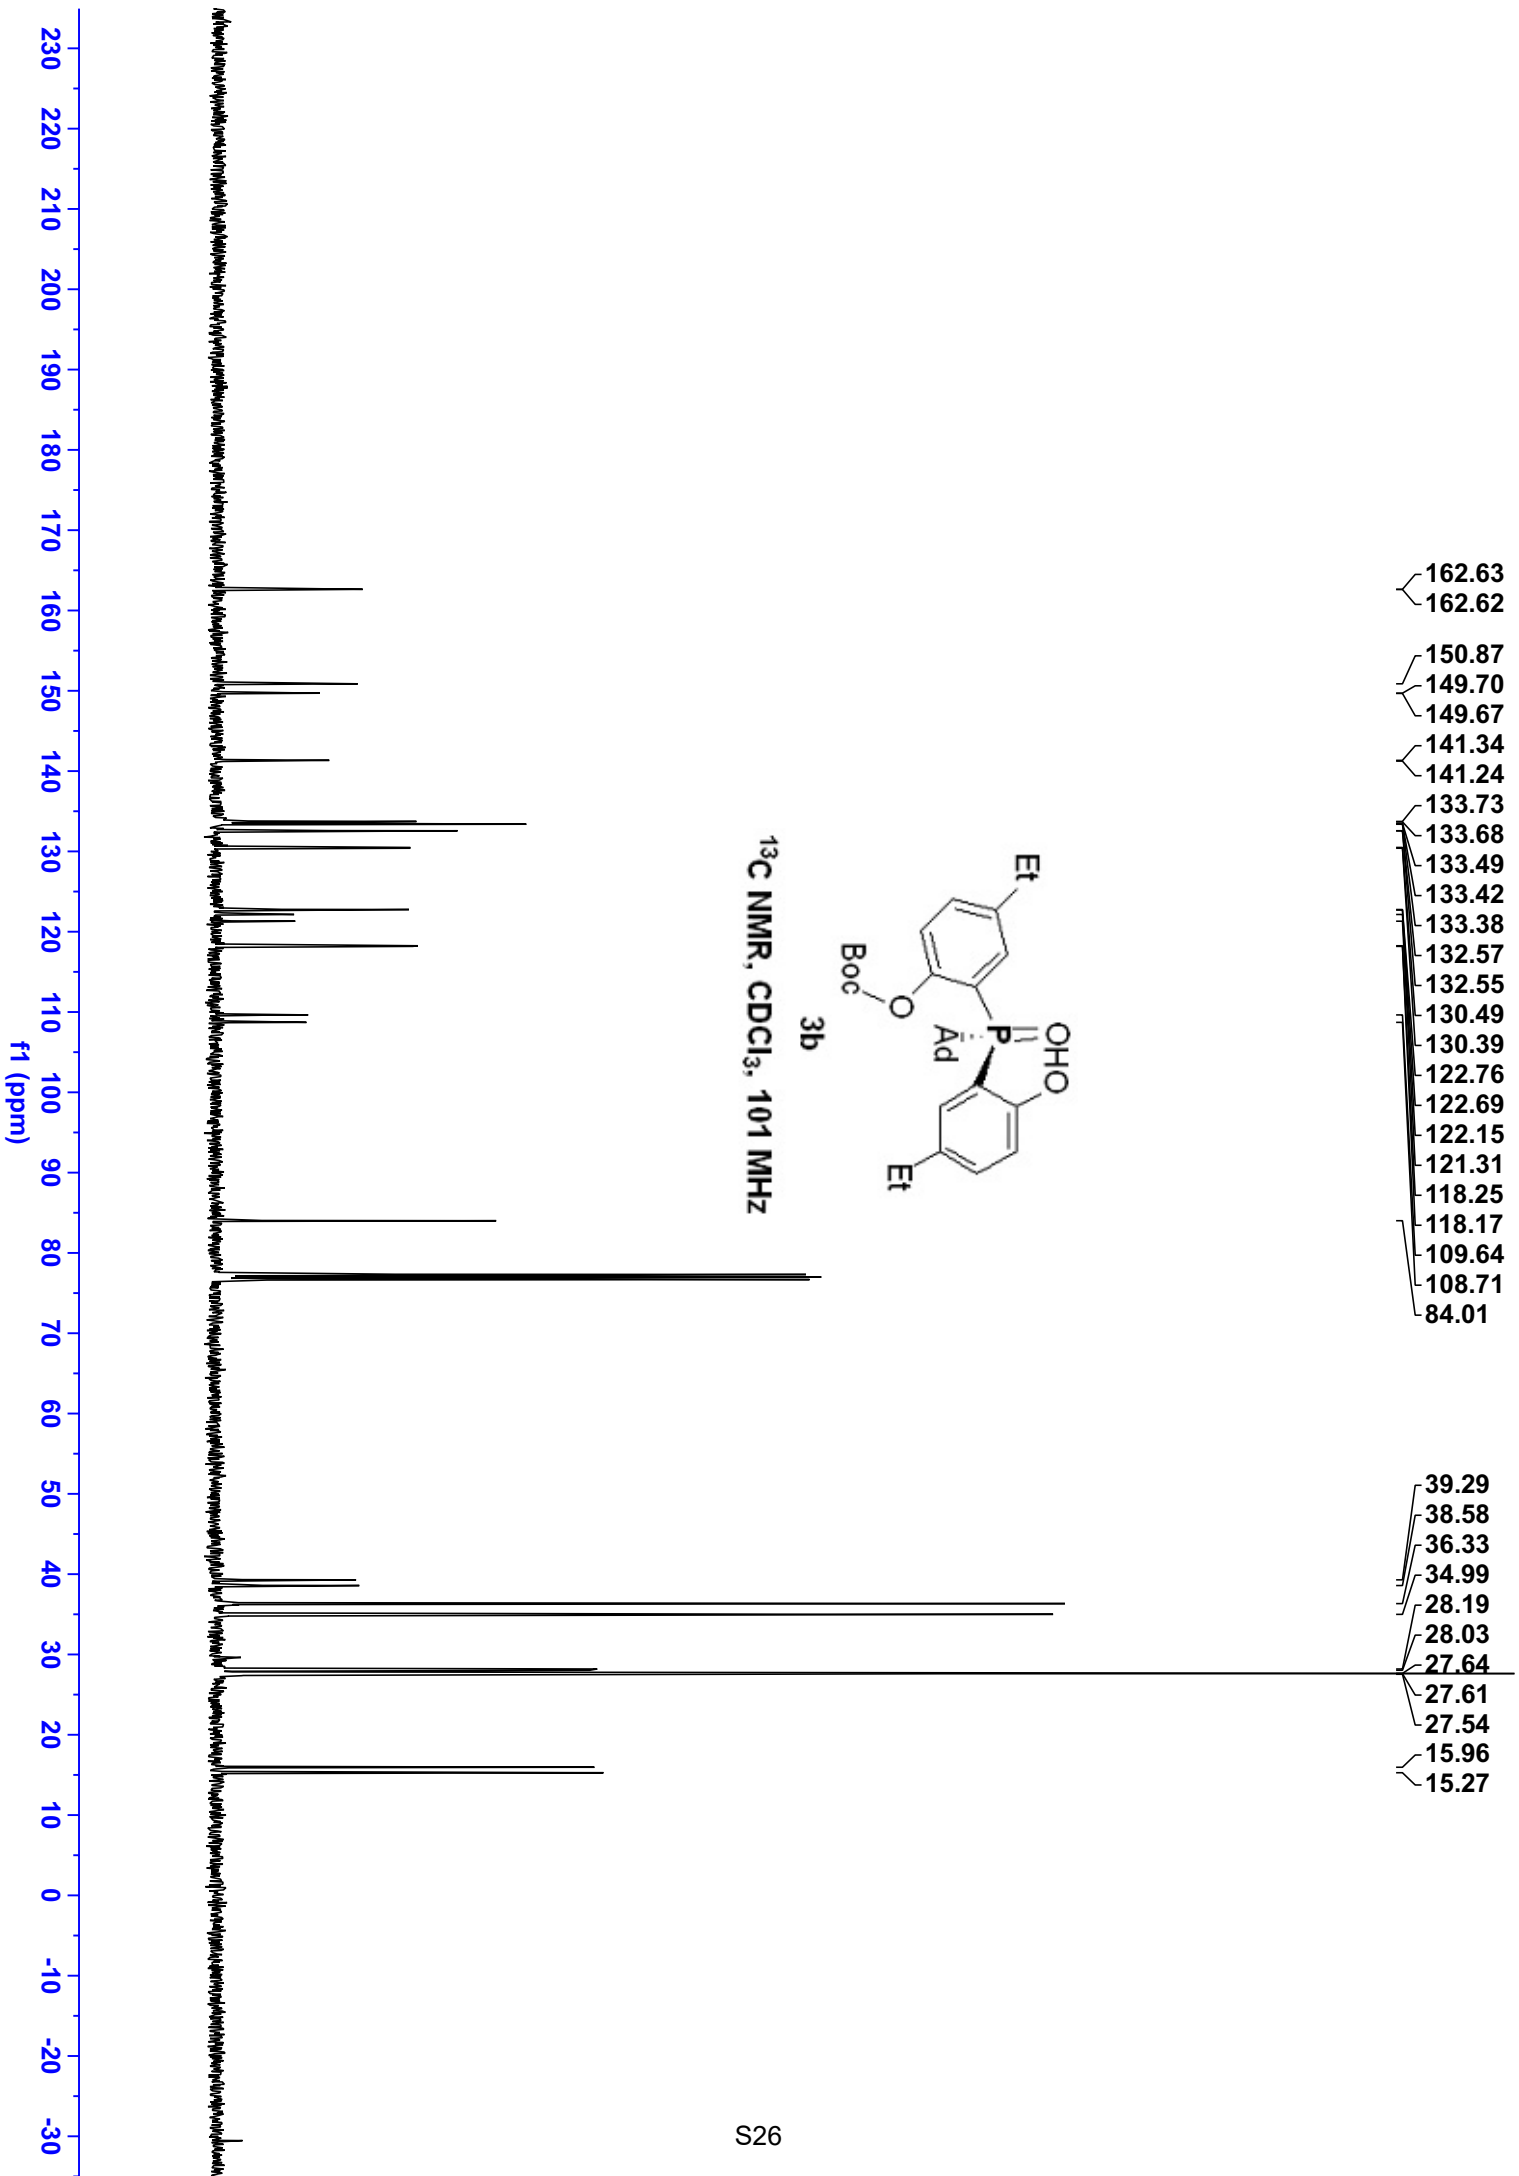

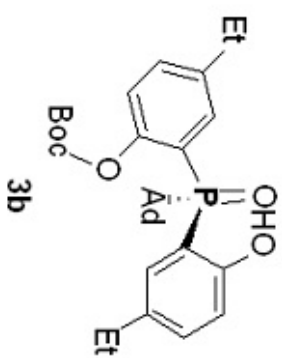

$^{31}\text{P}$  NMR,  $\text{CDCl}_3$ , 162 MHz



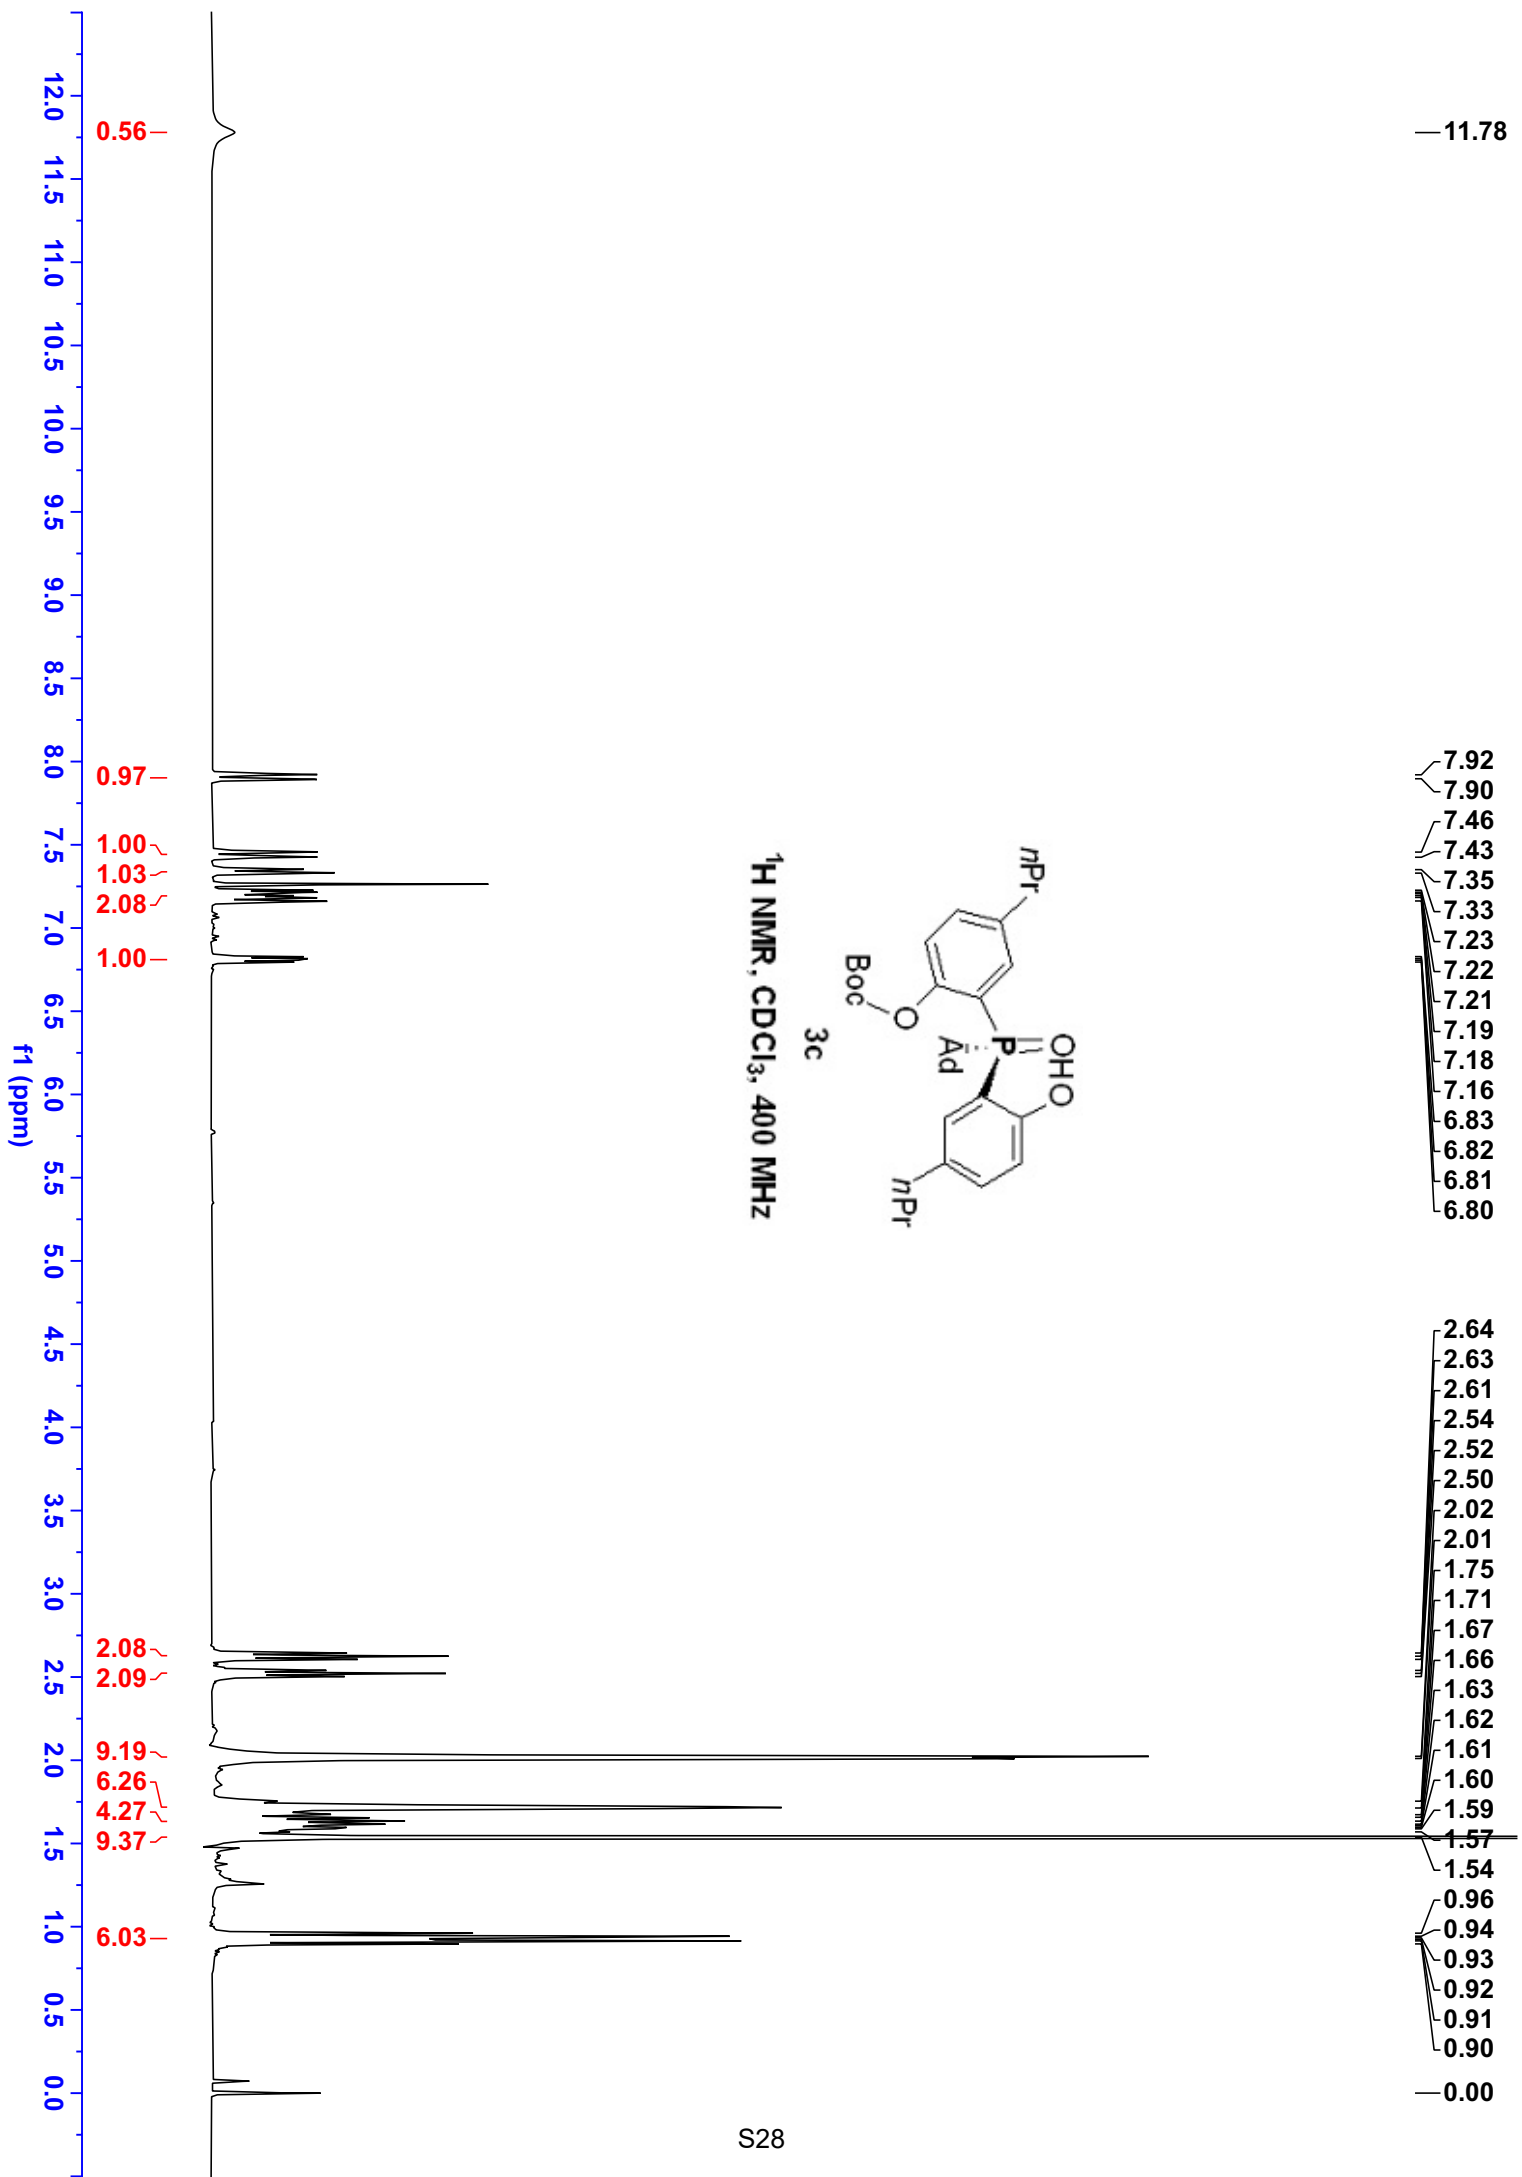

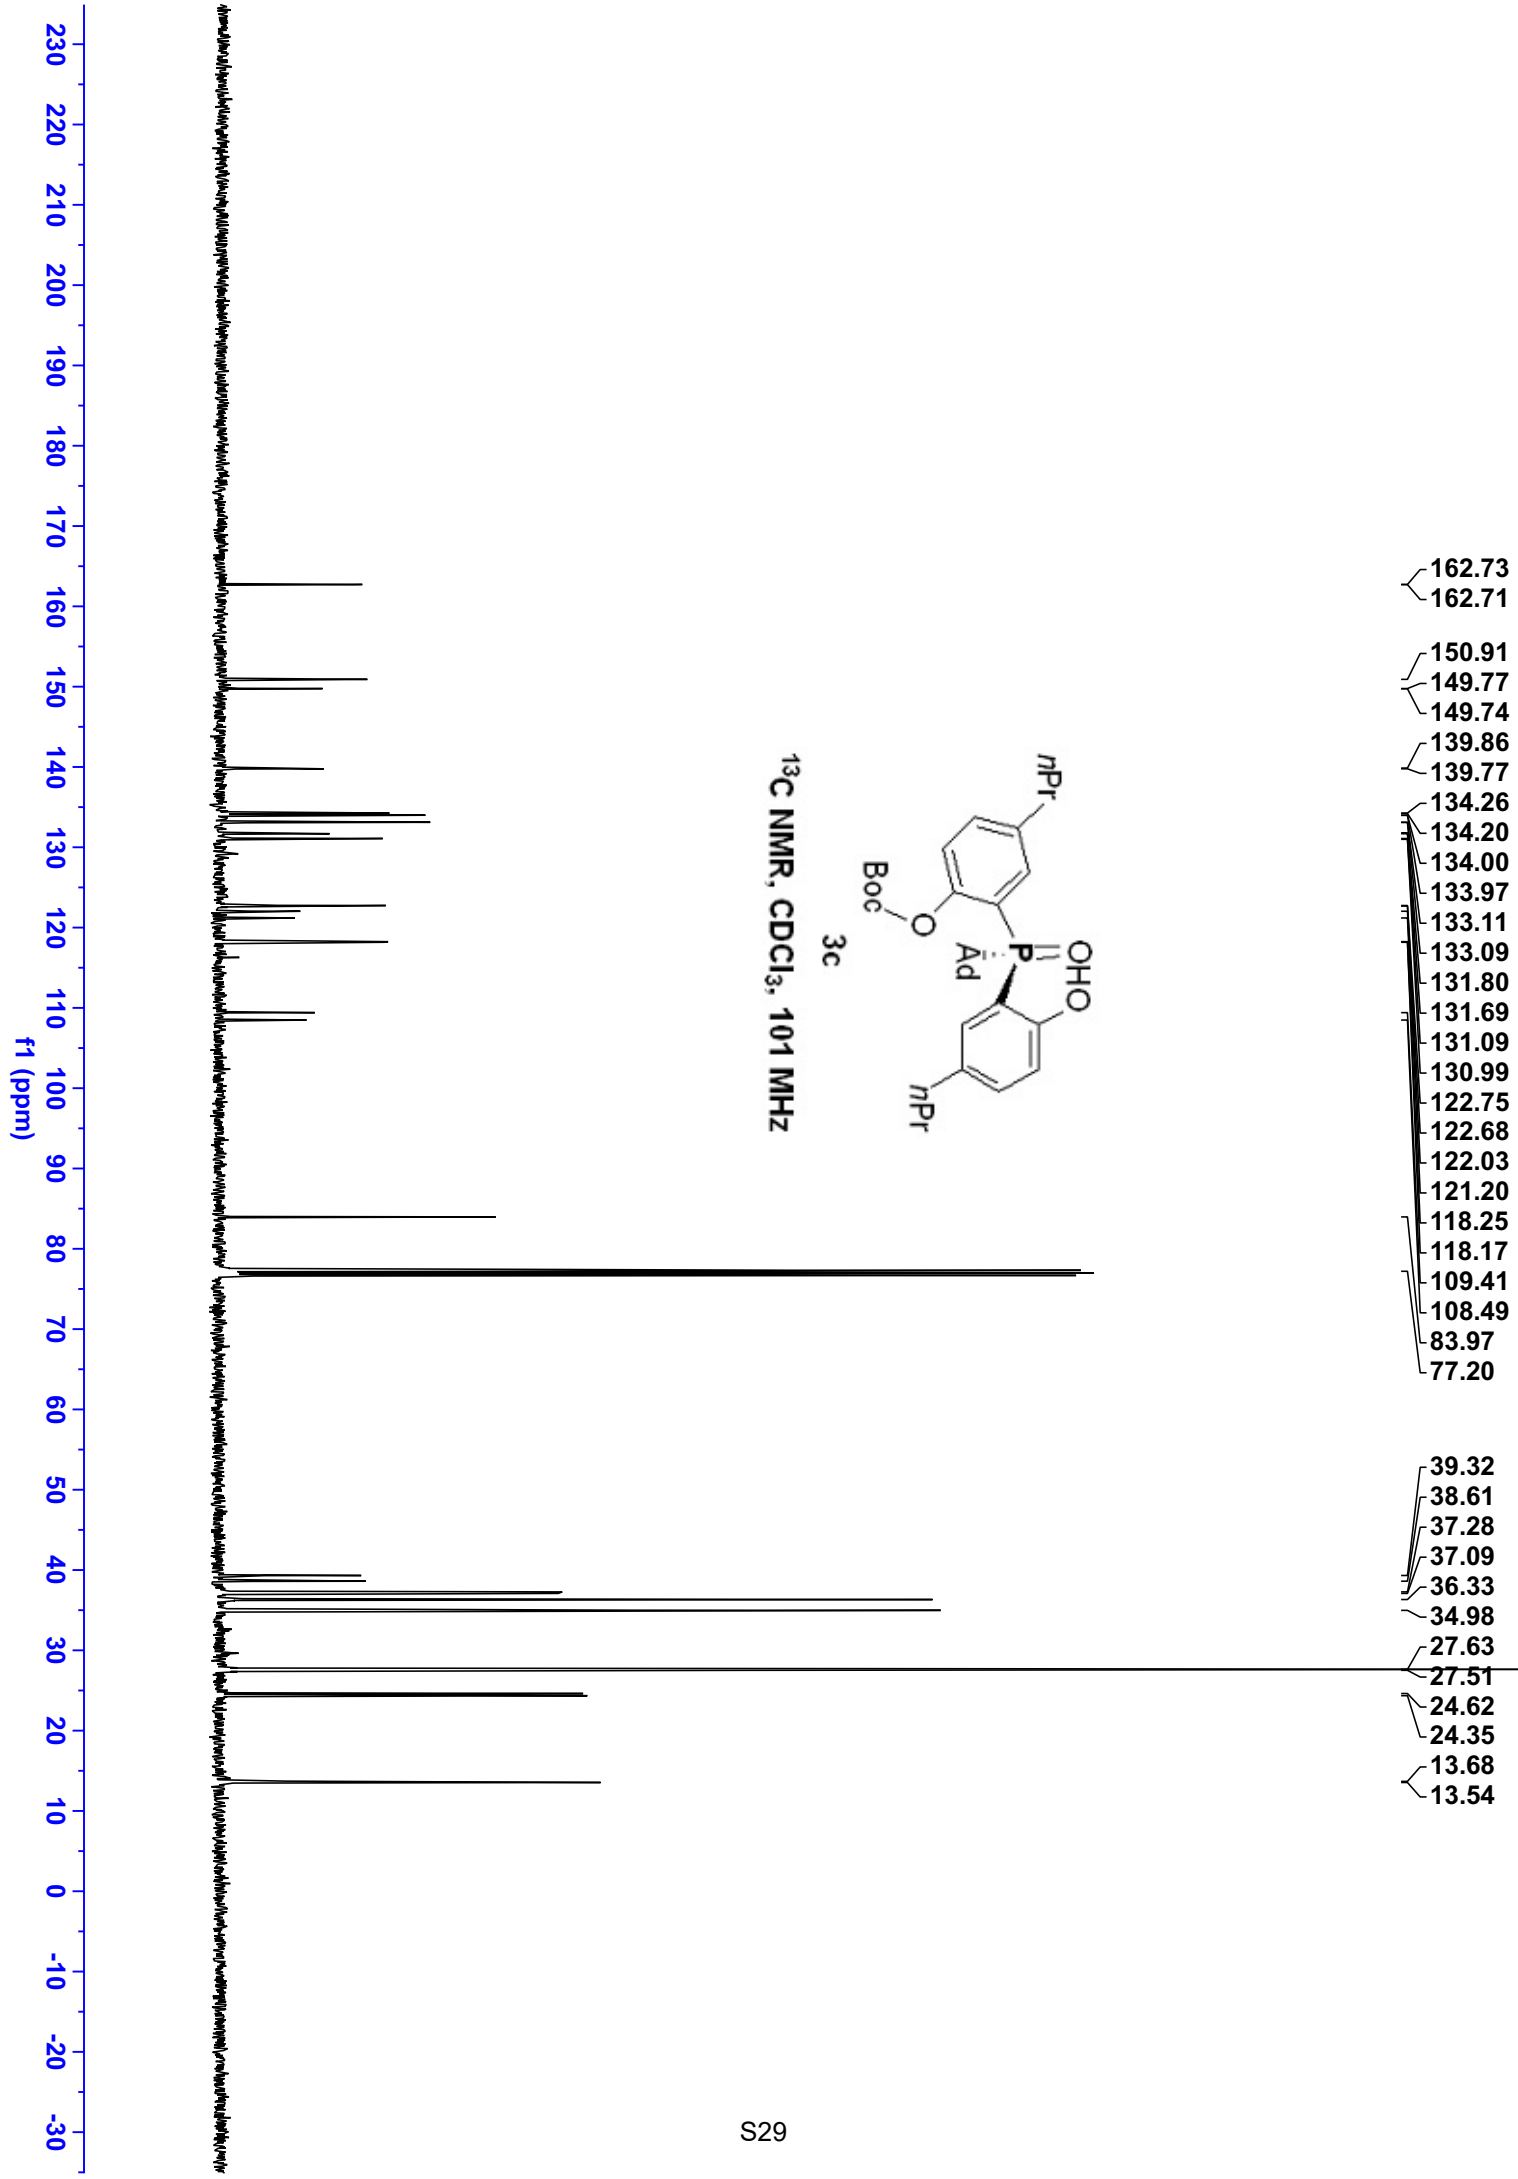

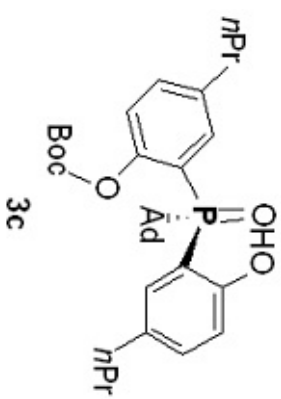

$^{31}\text{P}$  NMR,  $\text{CDCl}_3$ , 162 MHz

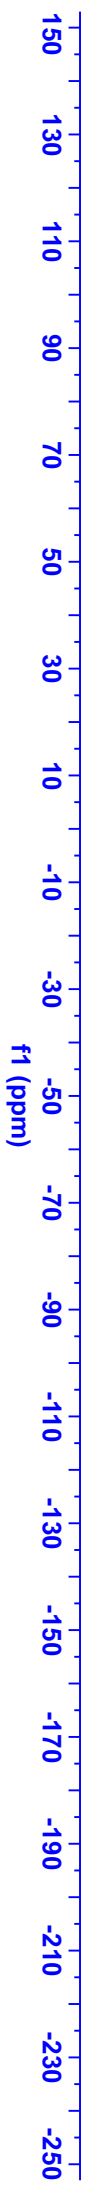

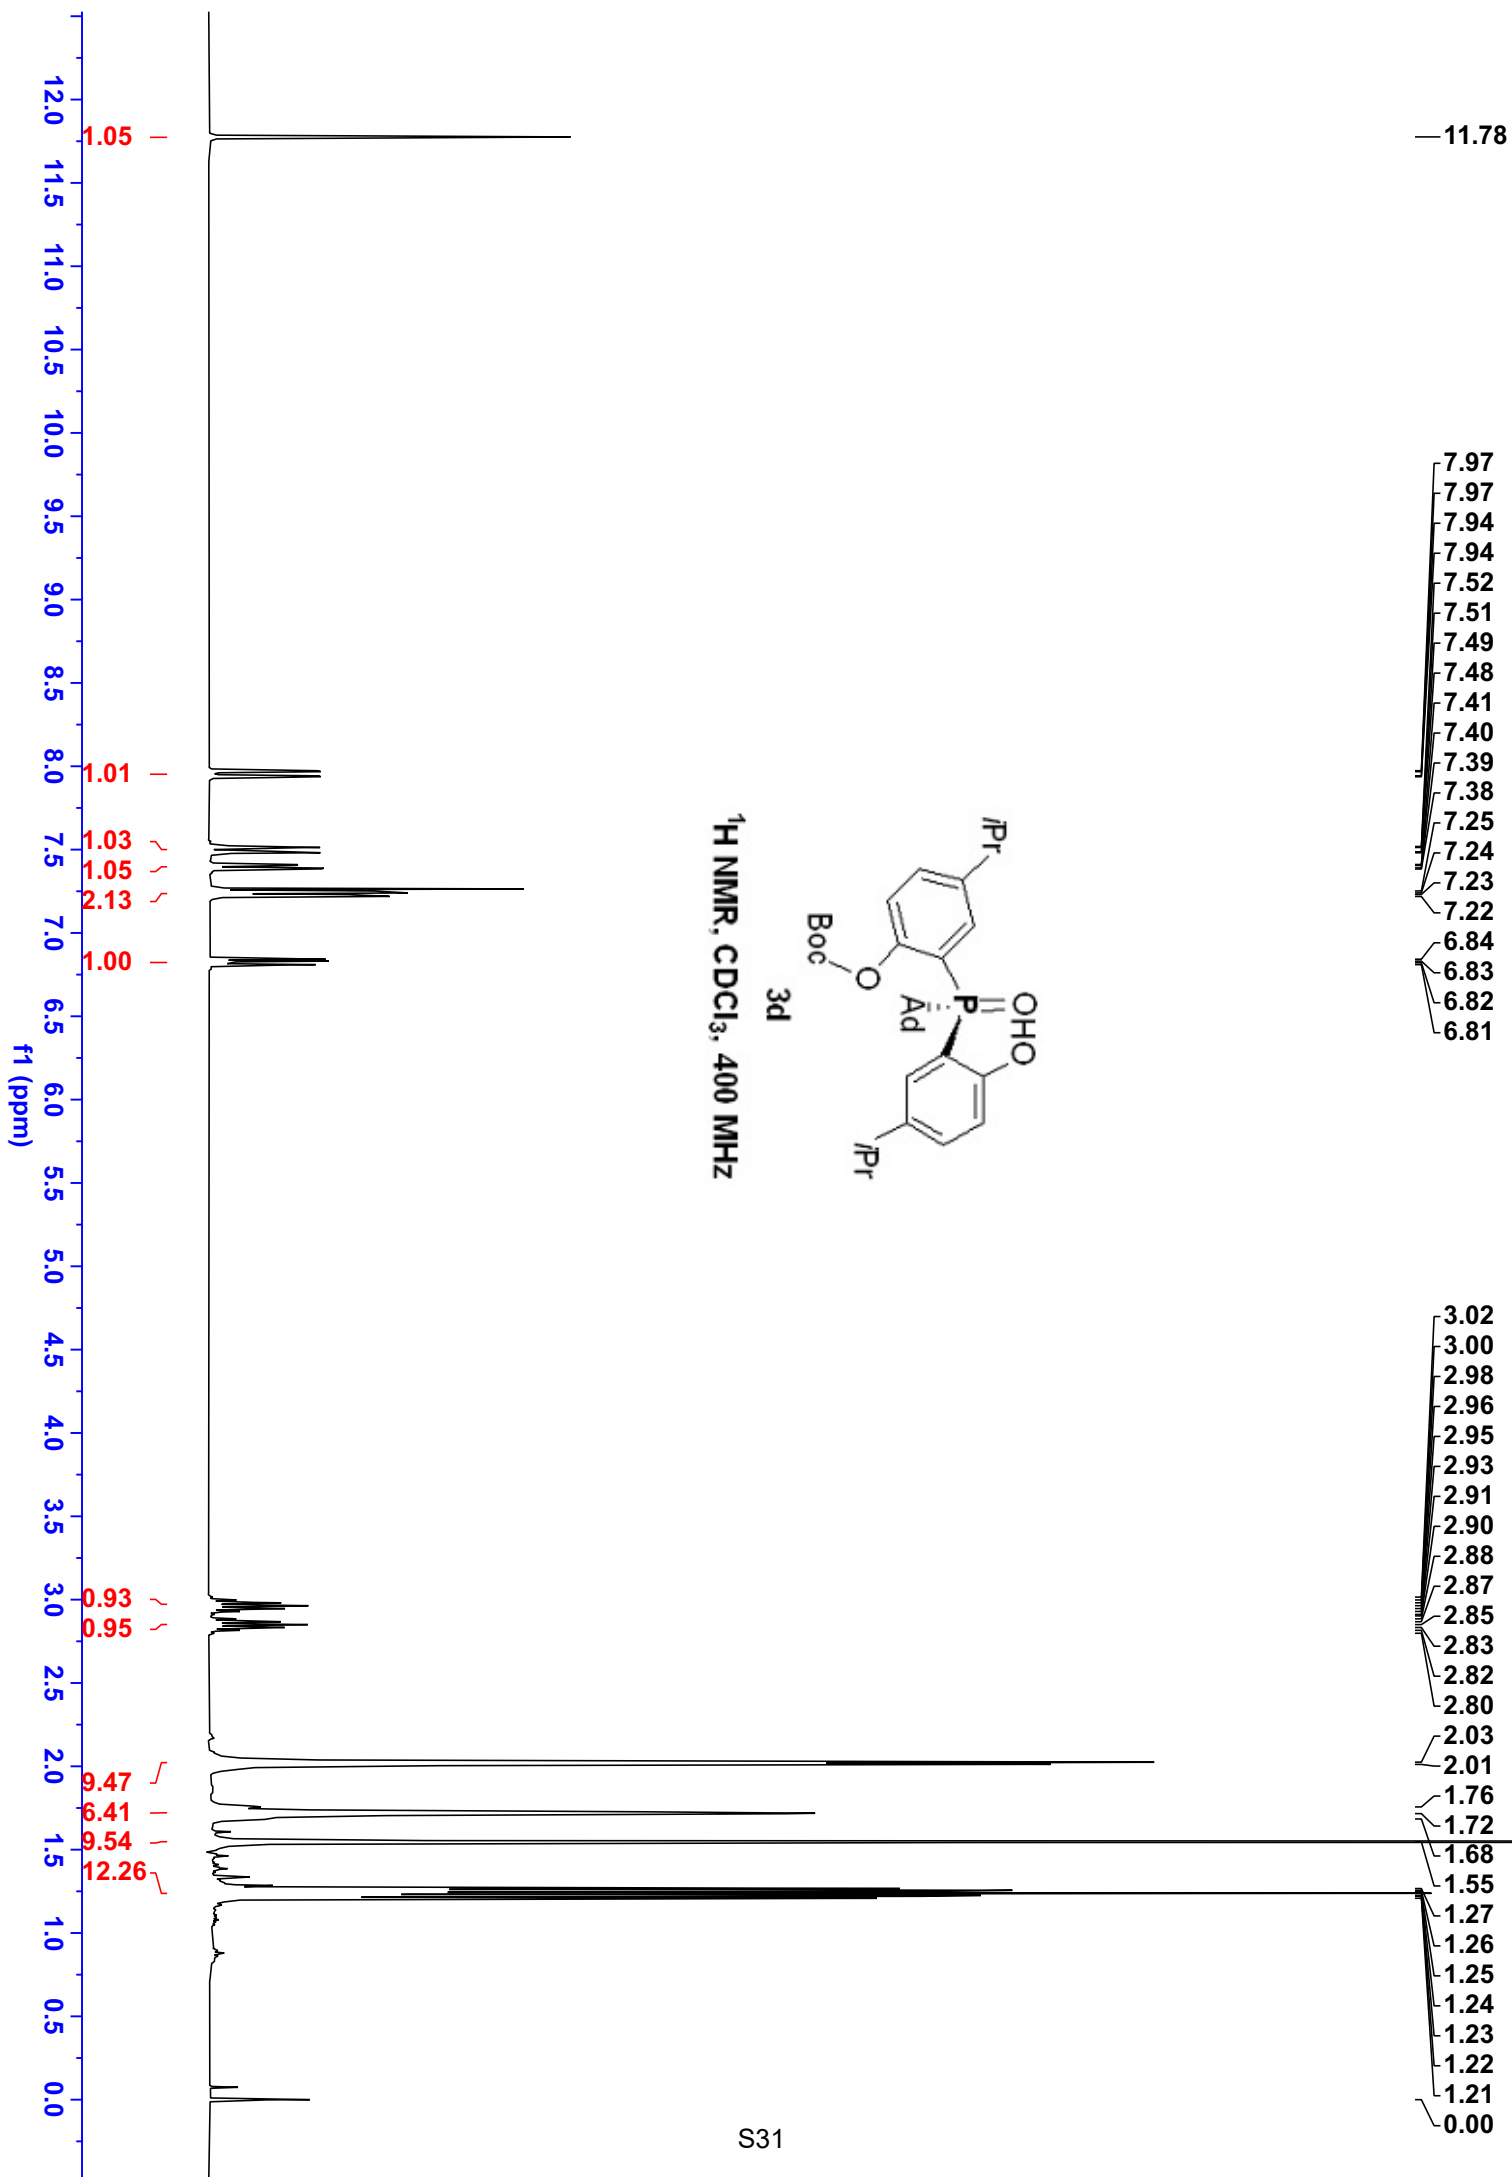

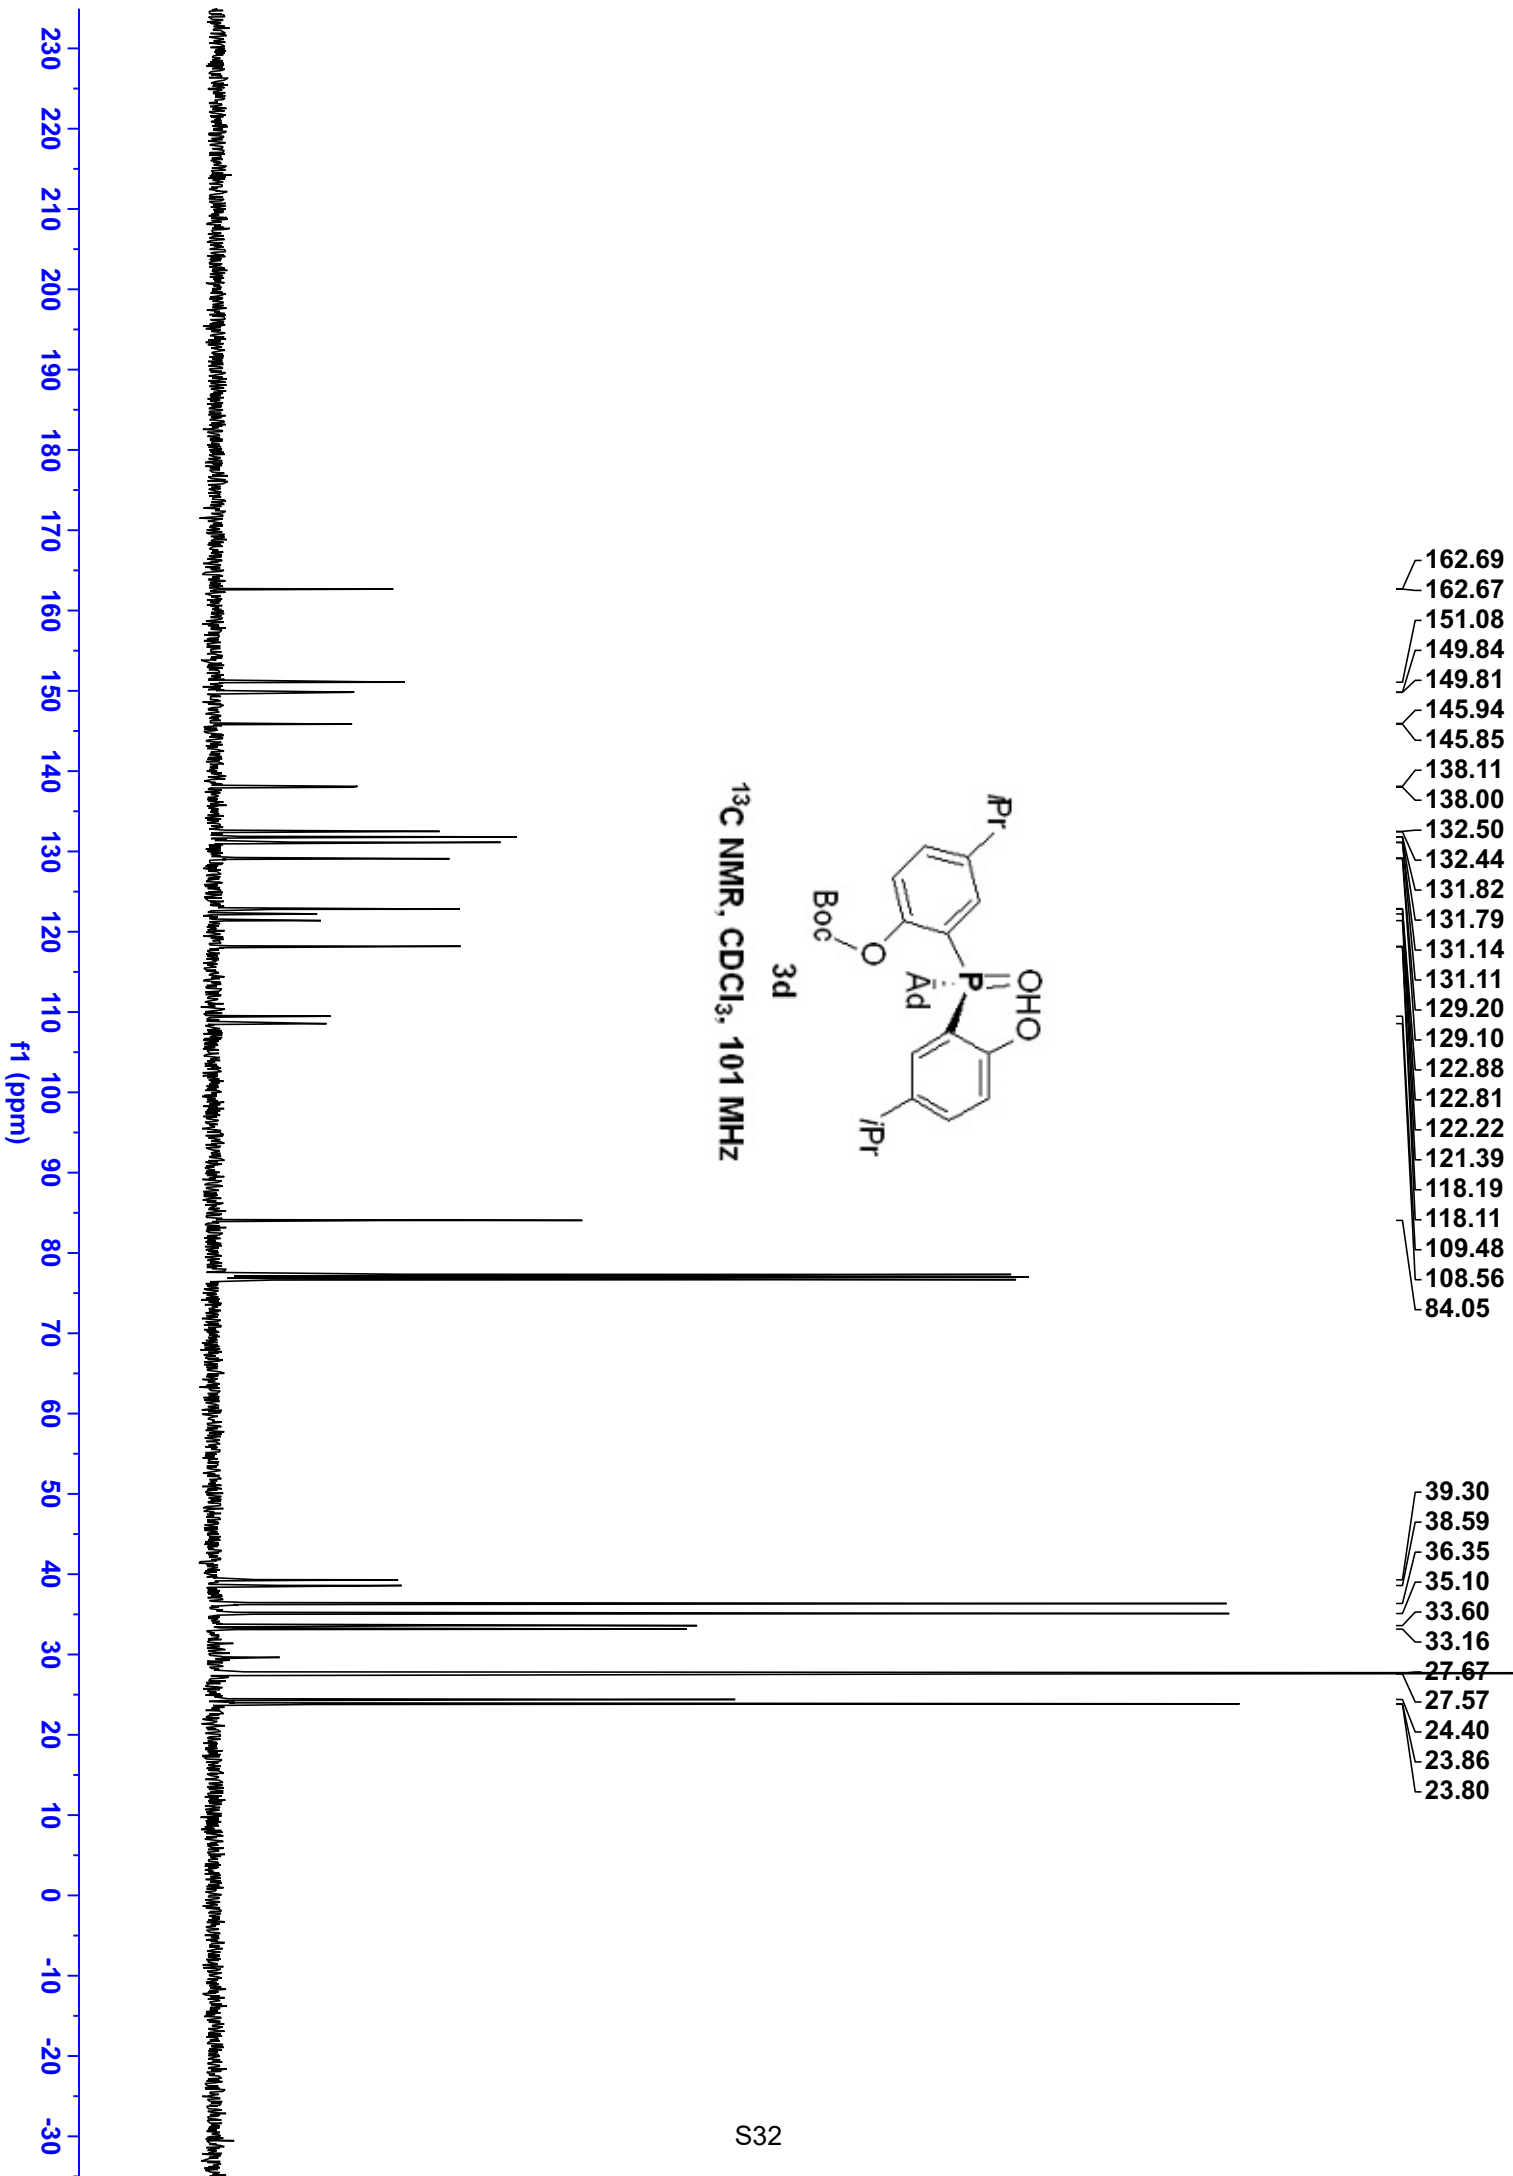

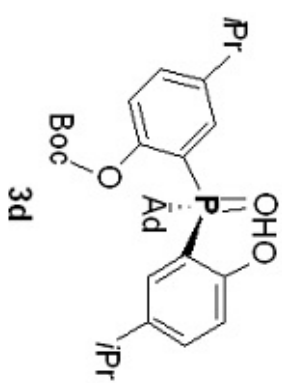

**<sup>31</sup>P NMR, CDCl<sub>3</sub>, 162 MHz**



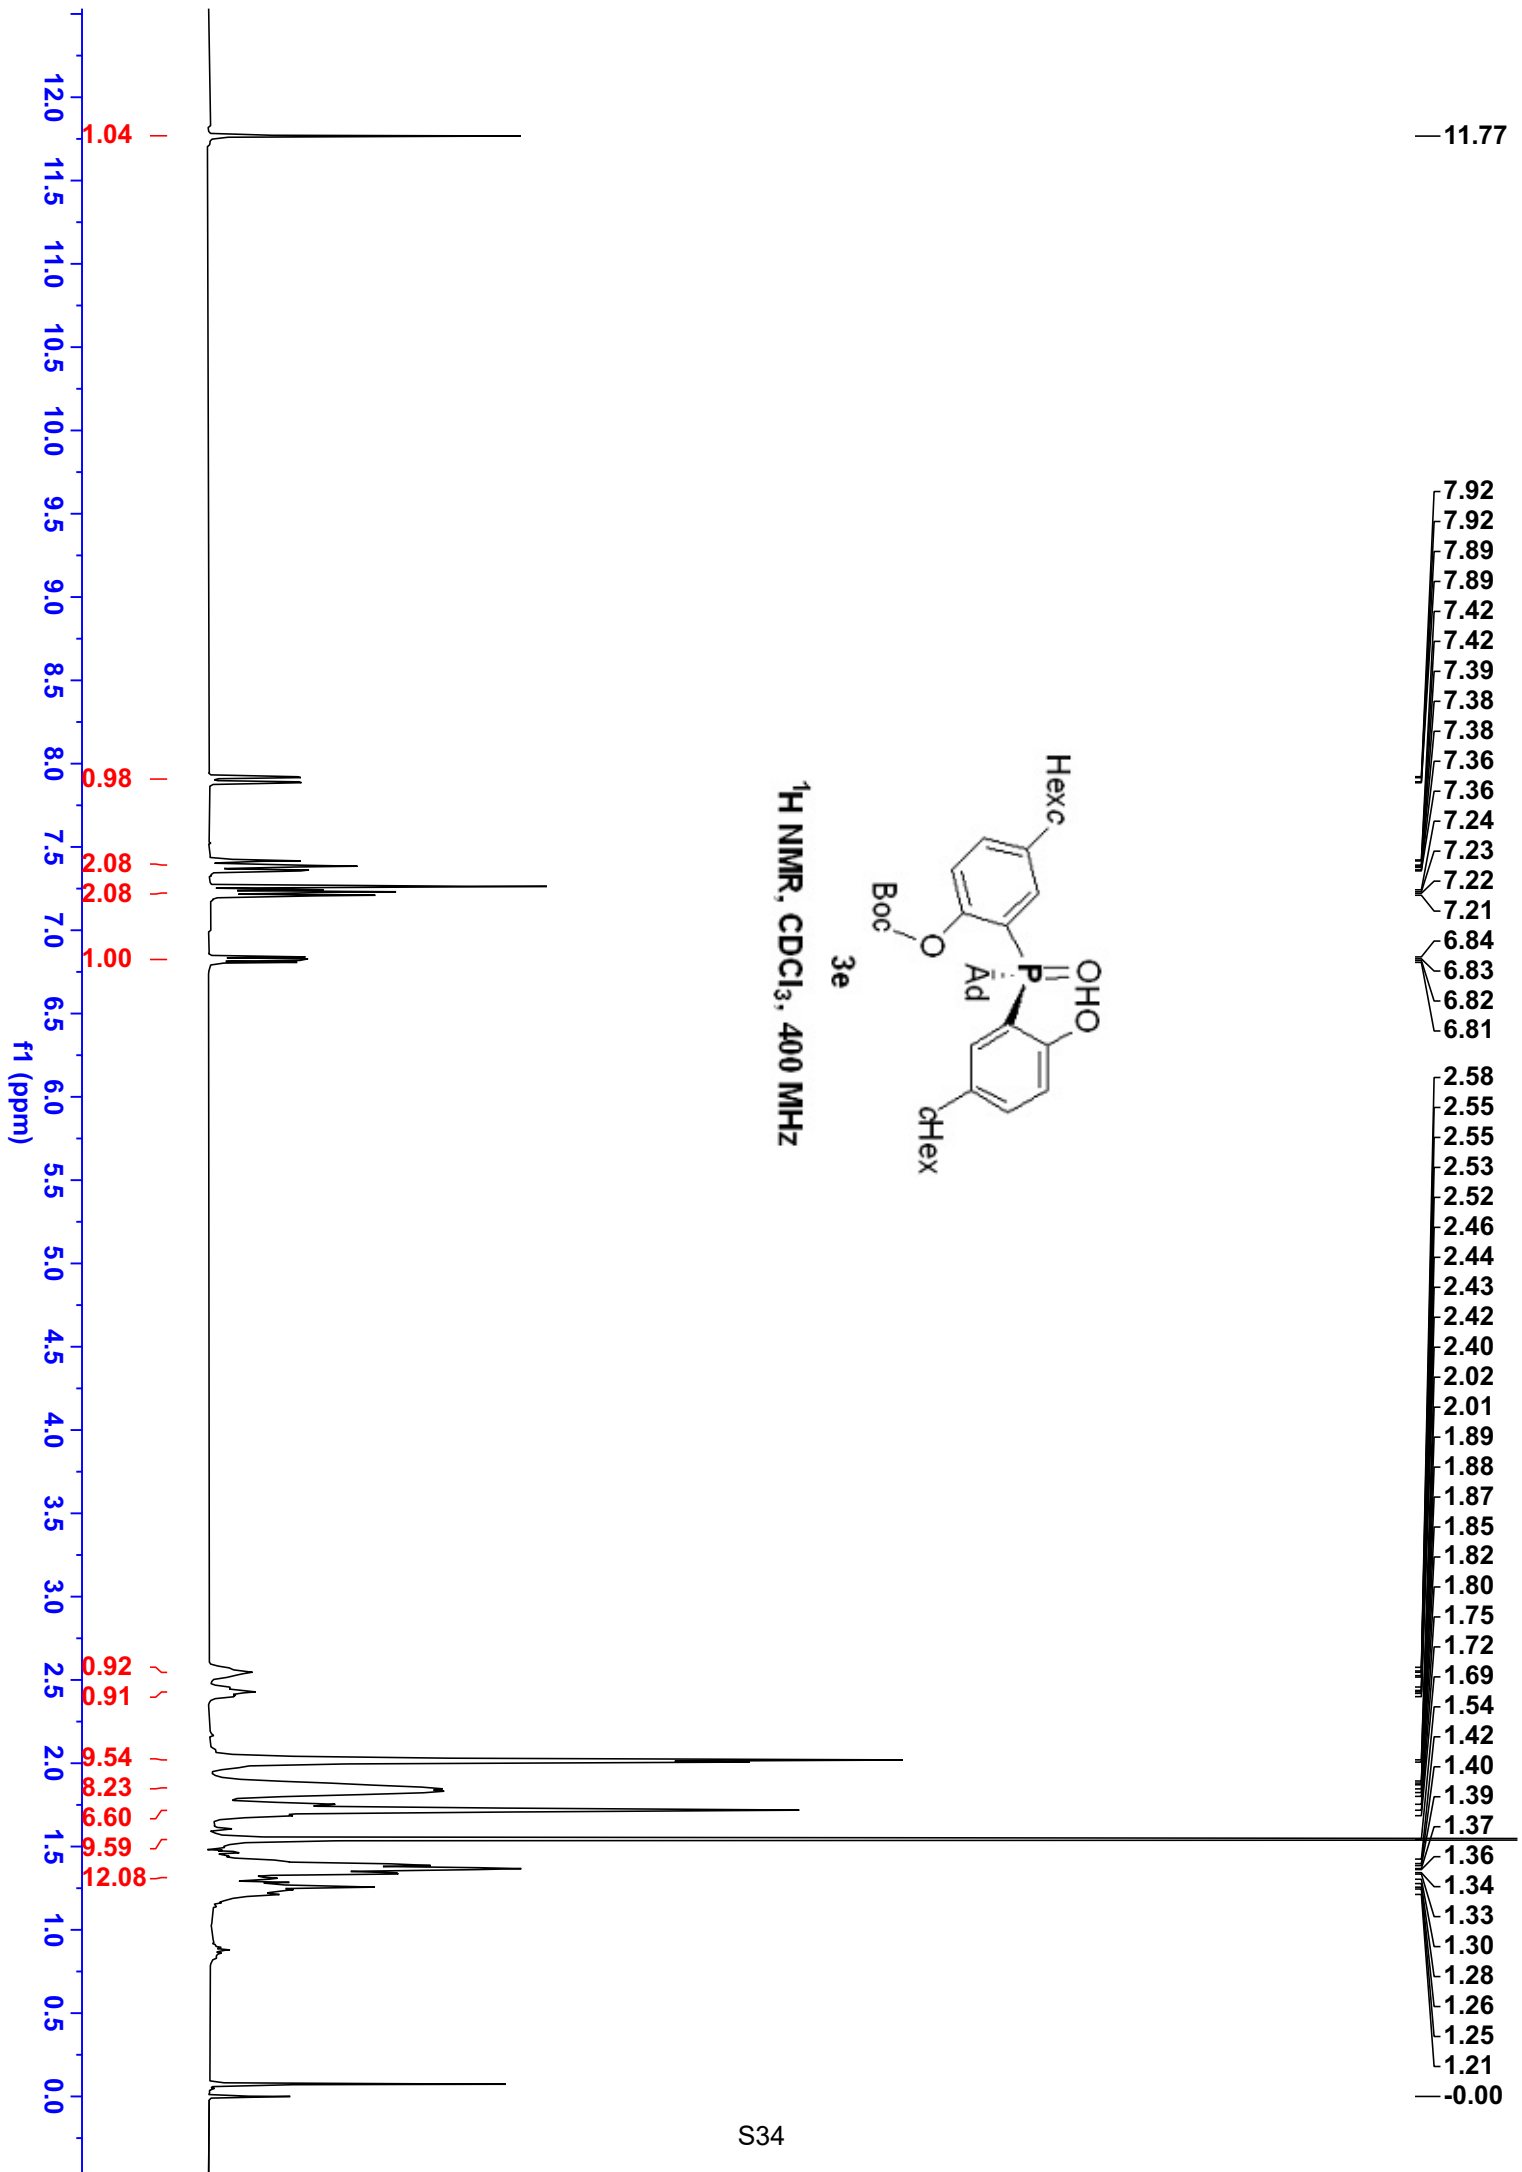

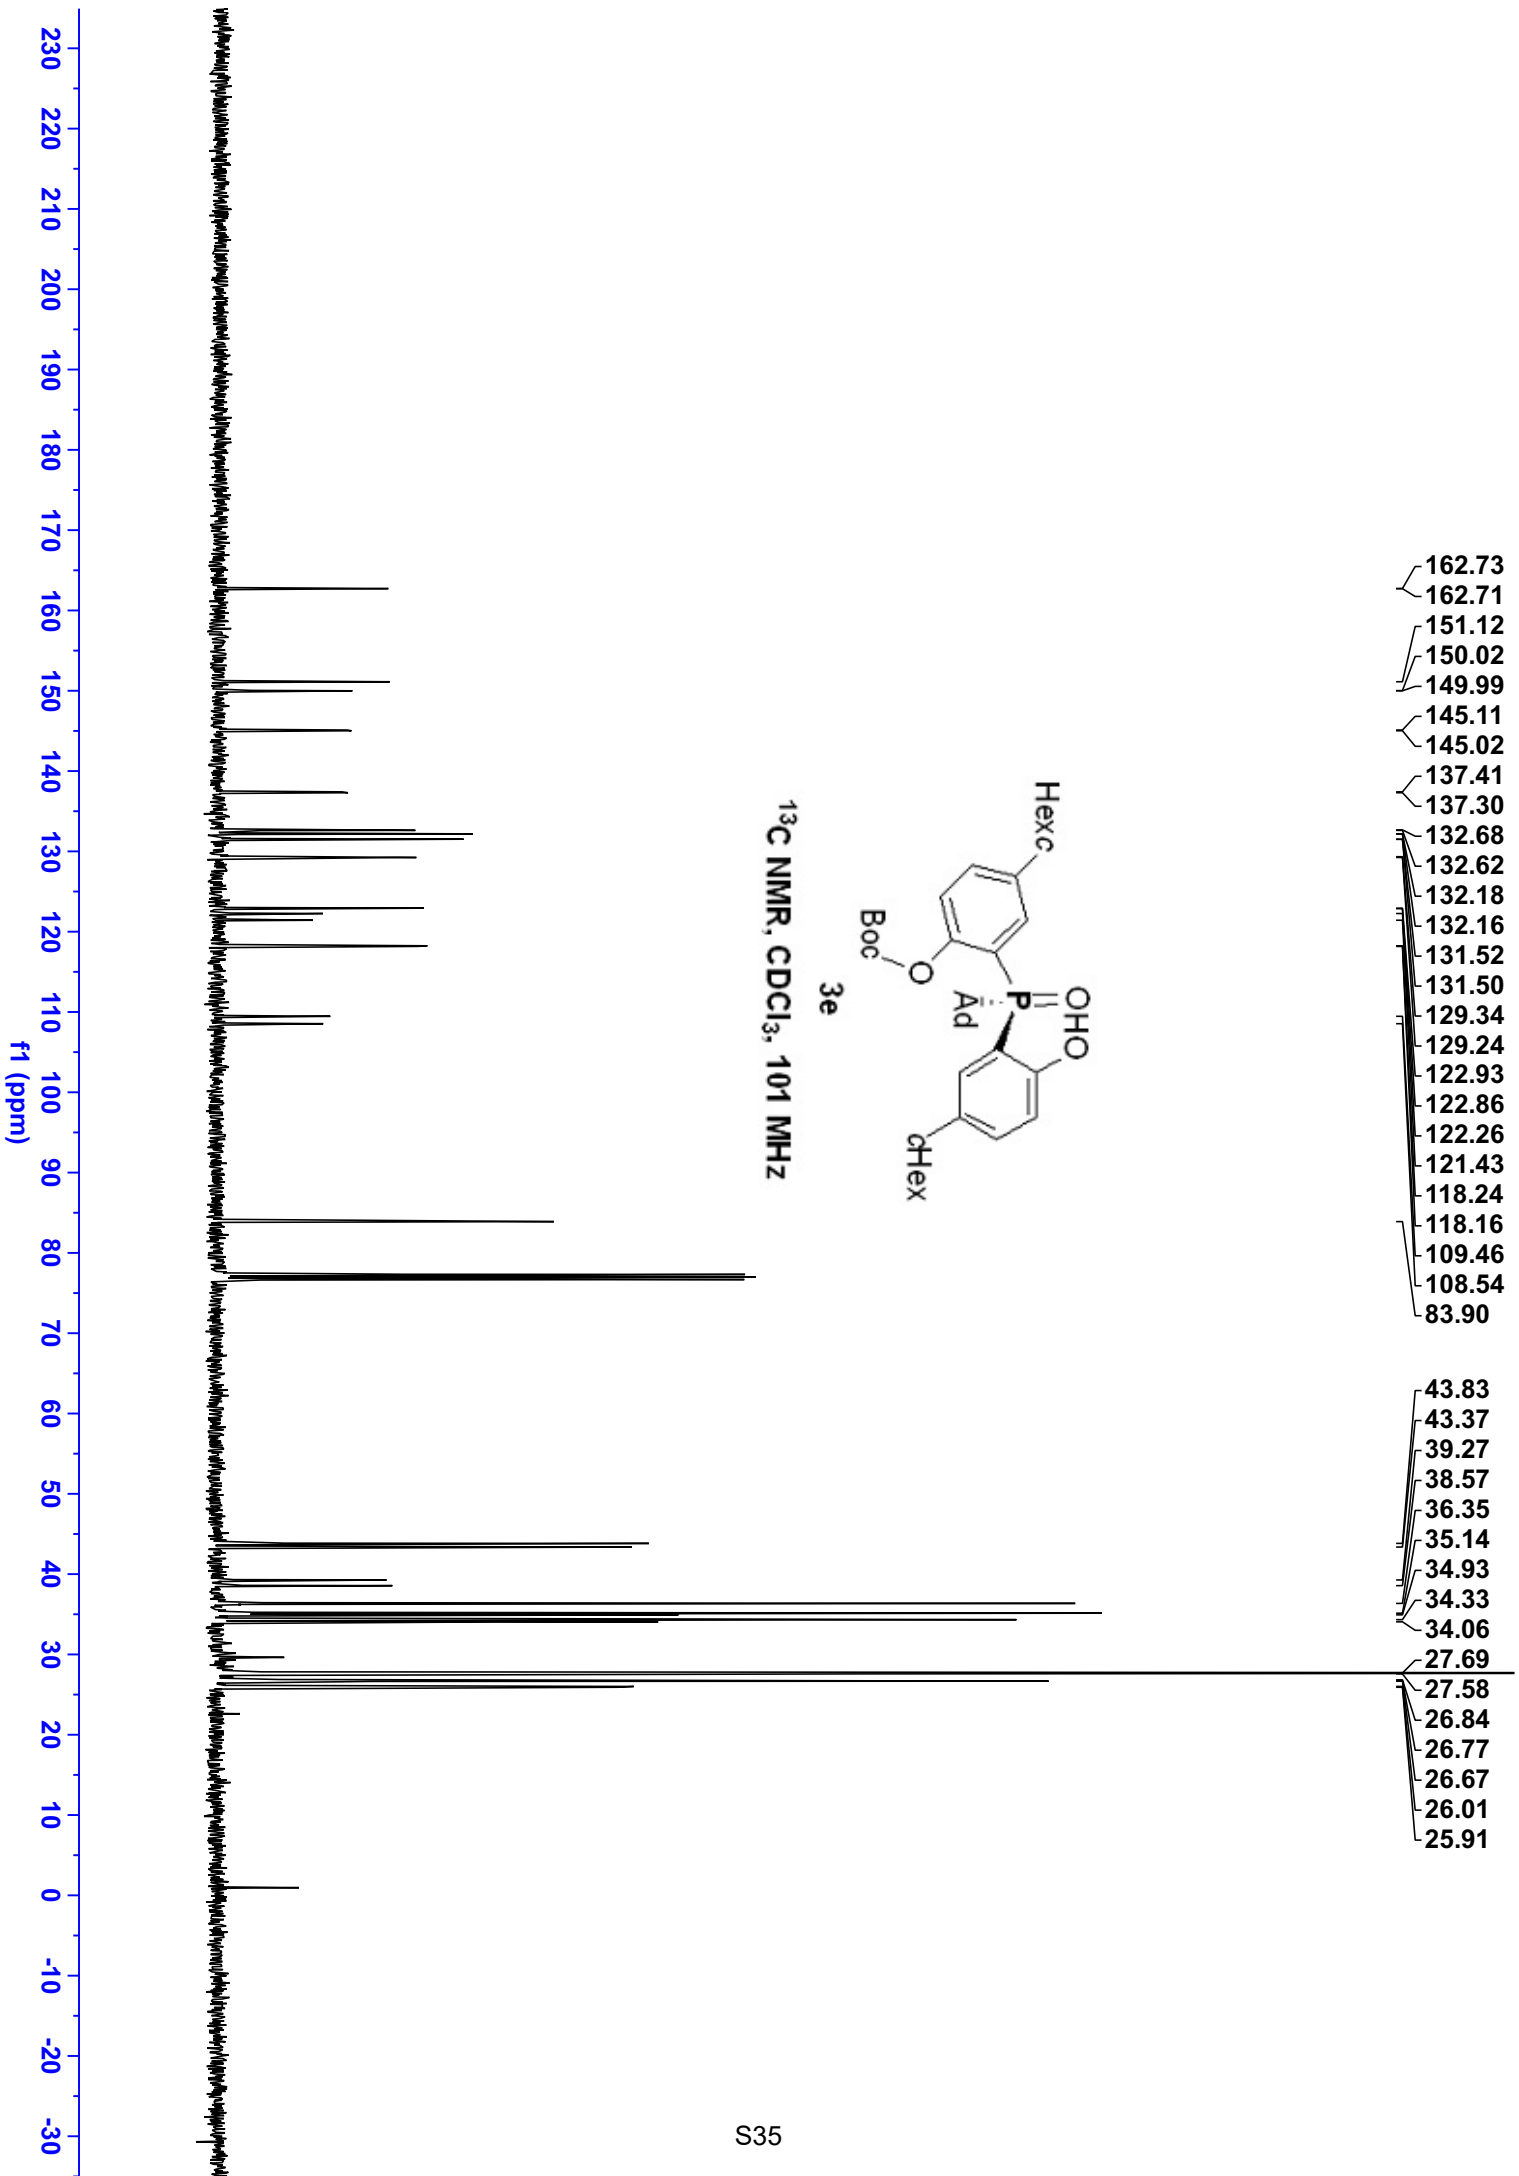

— 49.07

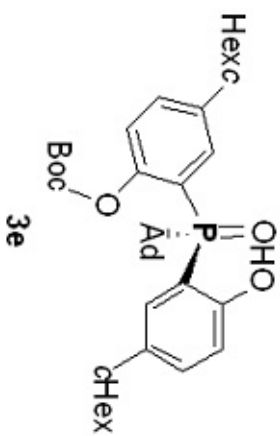

$^{31}\text{P}$  NMR,  $\text{CDCl}_3$ , 162 MHz

3e



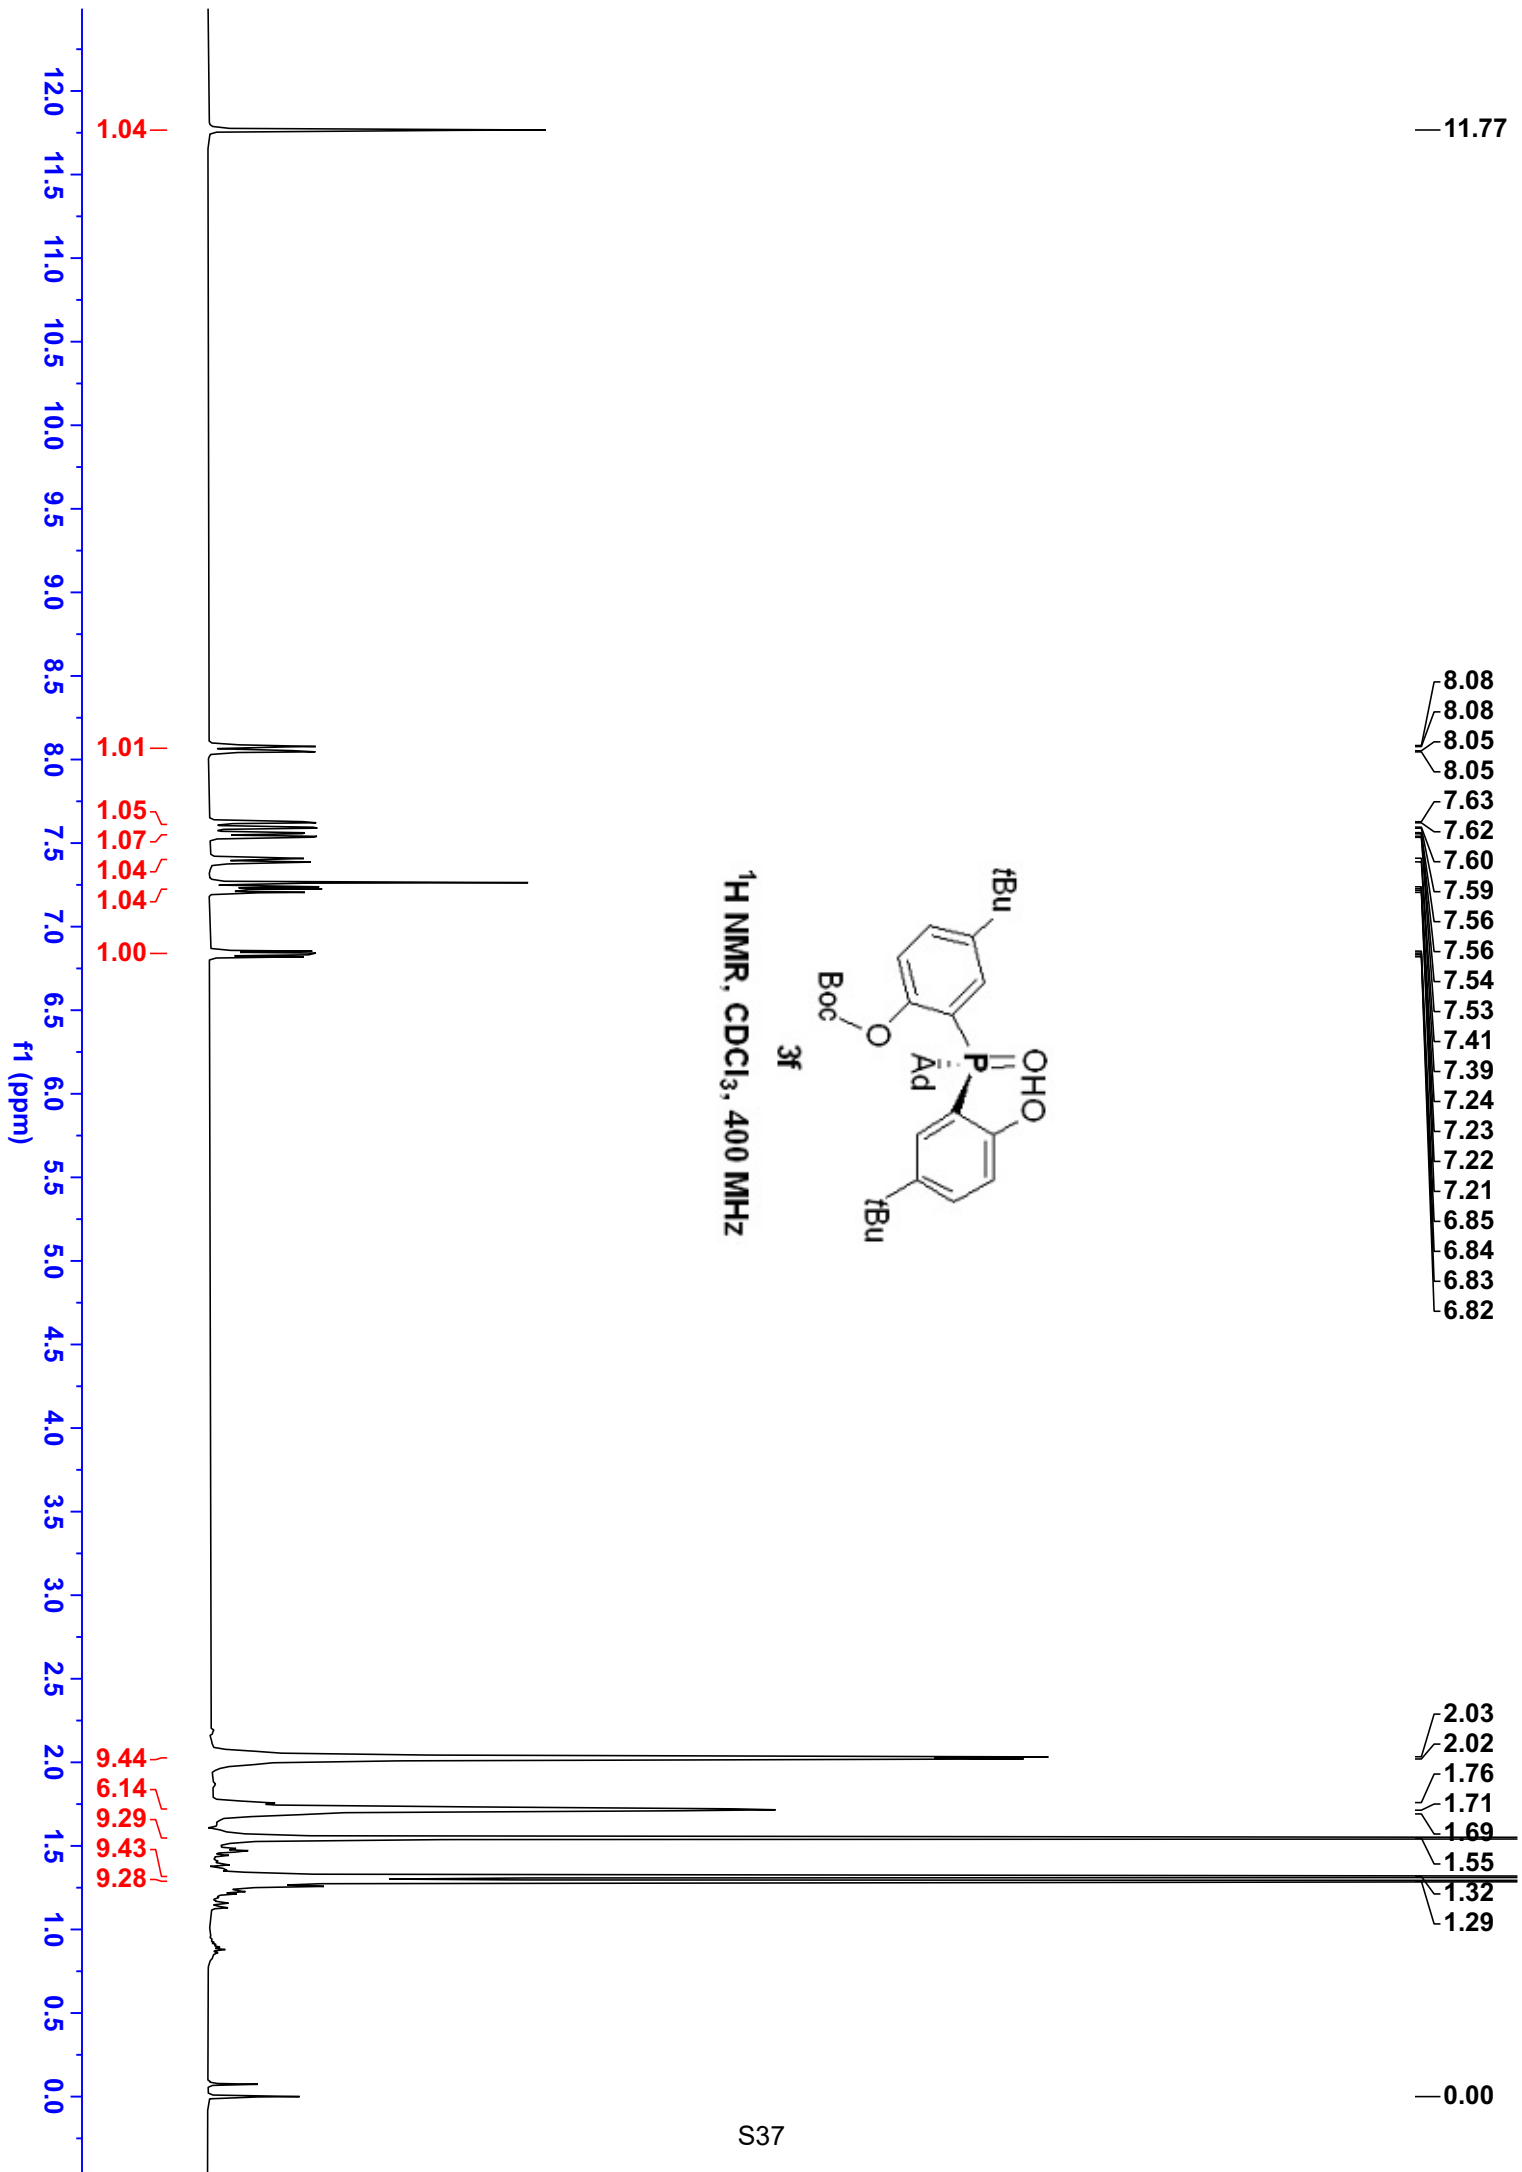

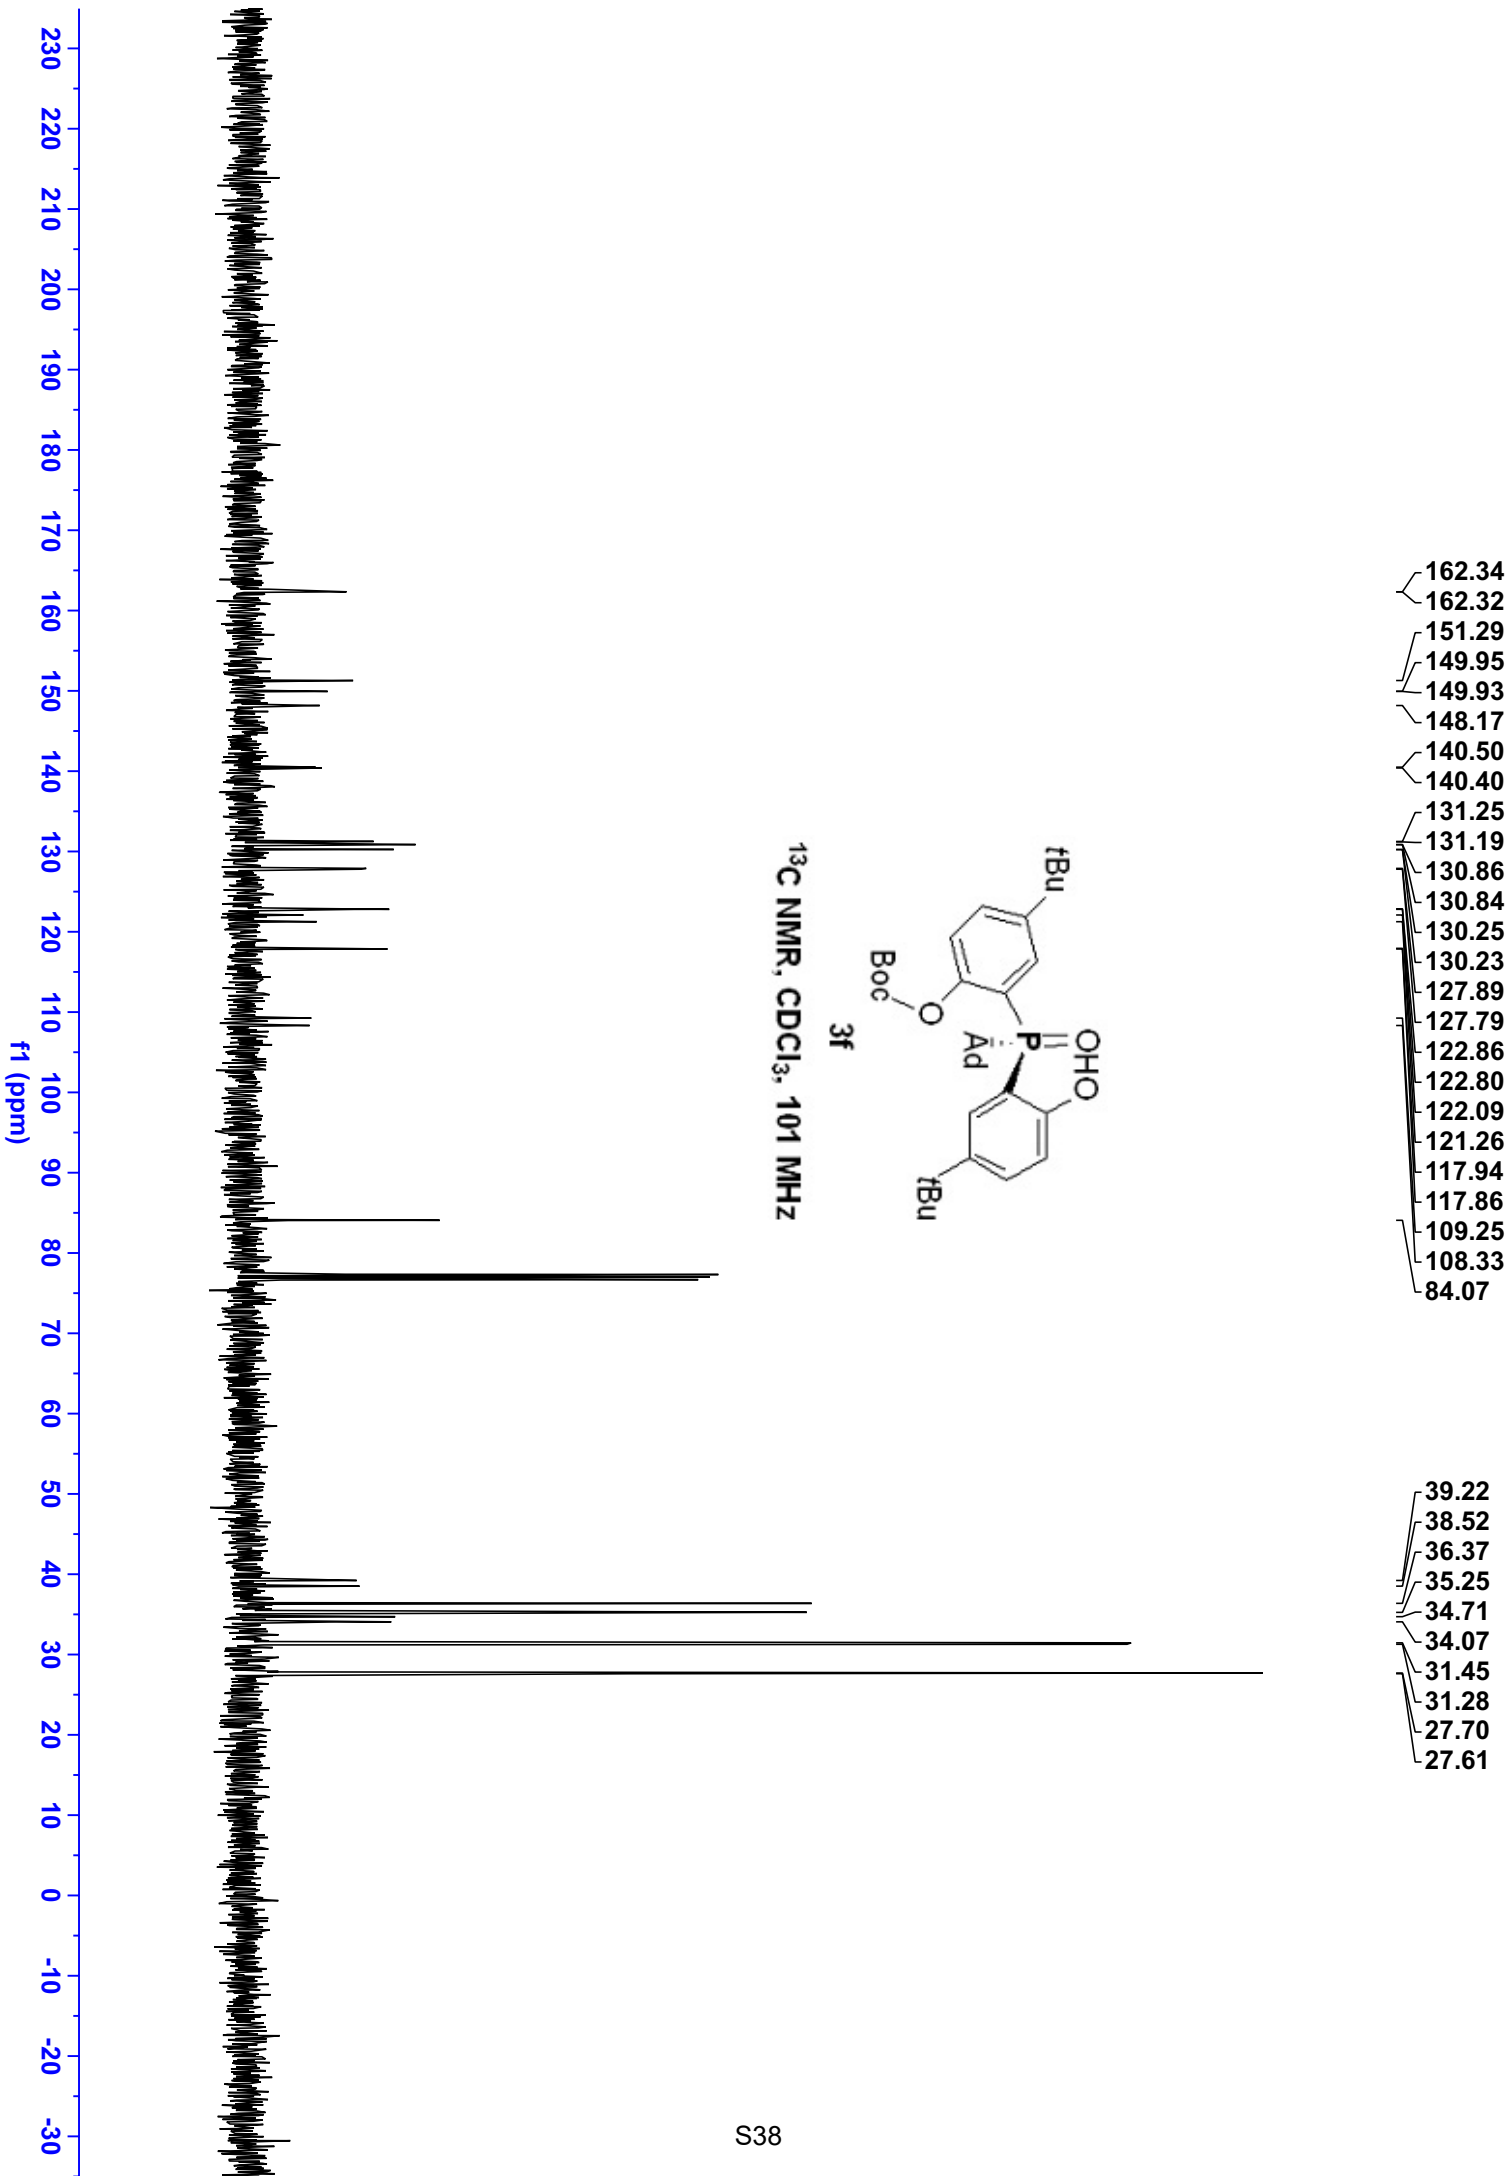

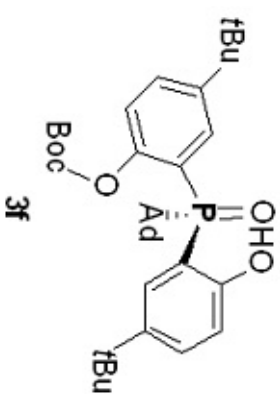

**<sup>31</sup>P NMR, CDCl<sub>3</sub>, 162 MHz**



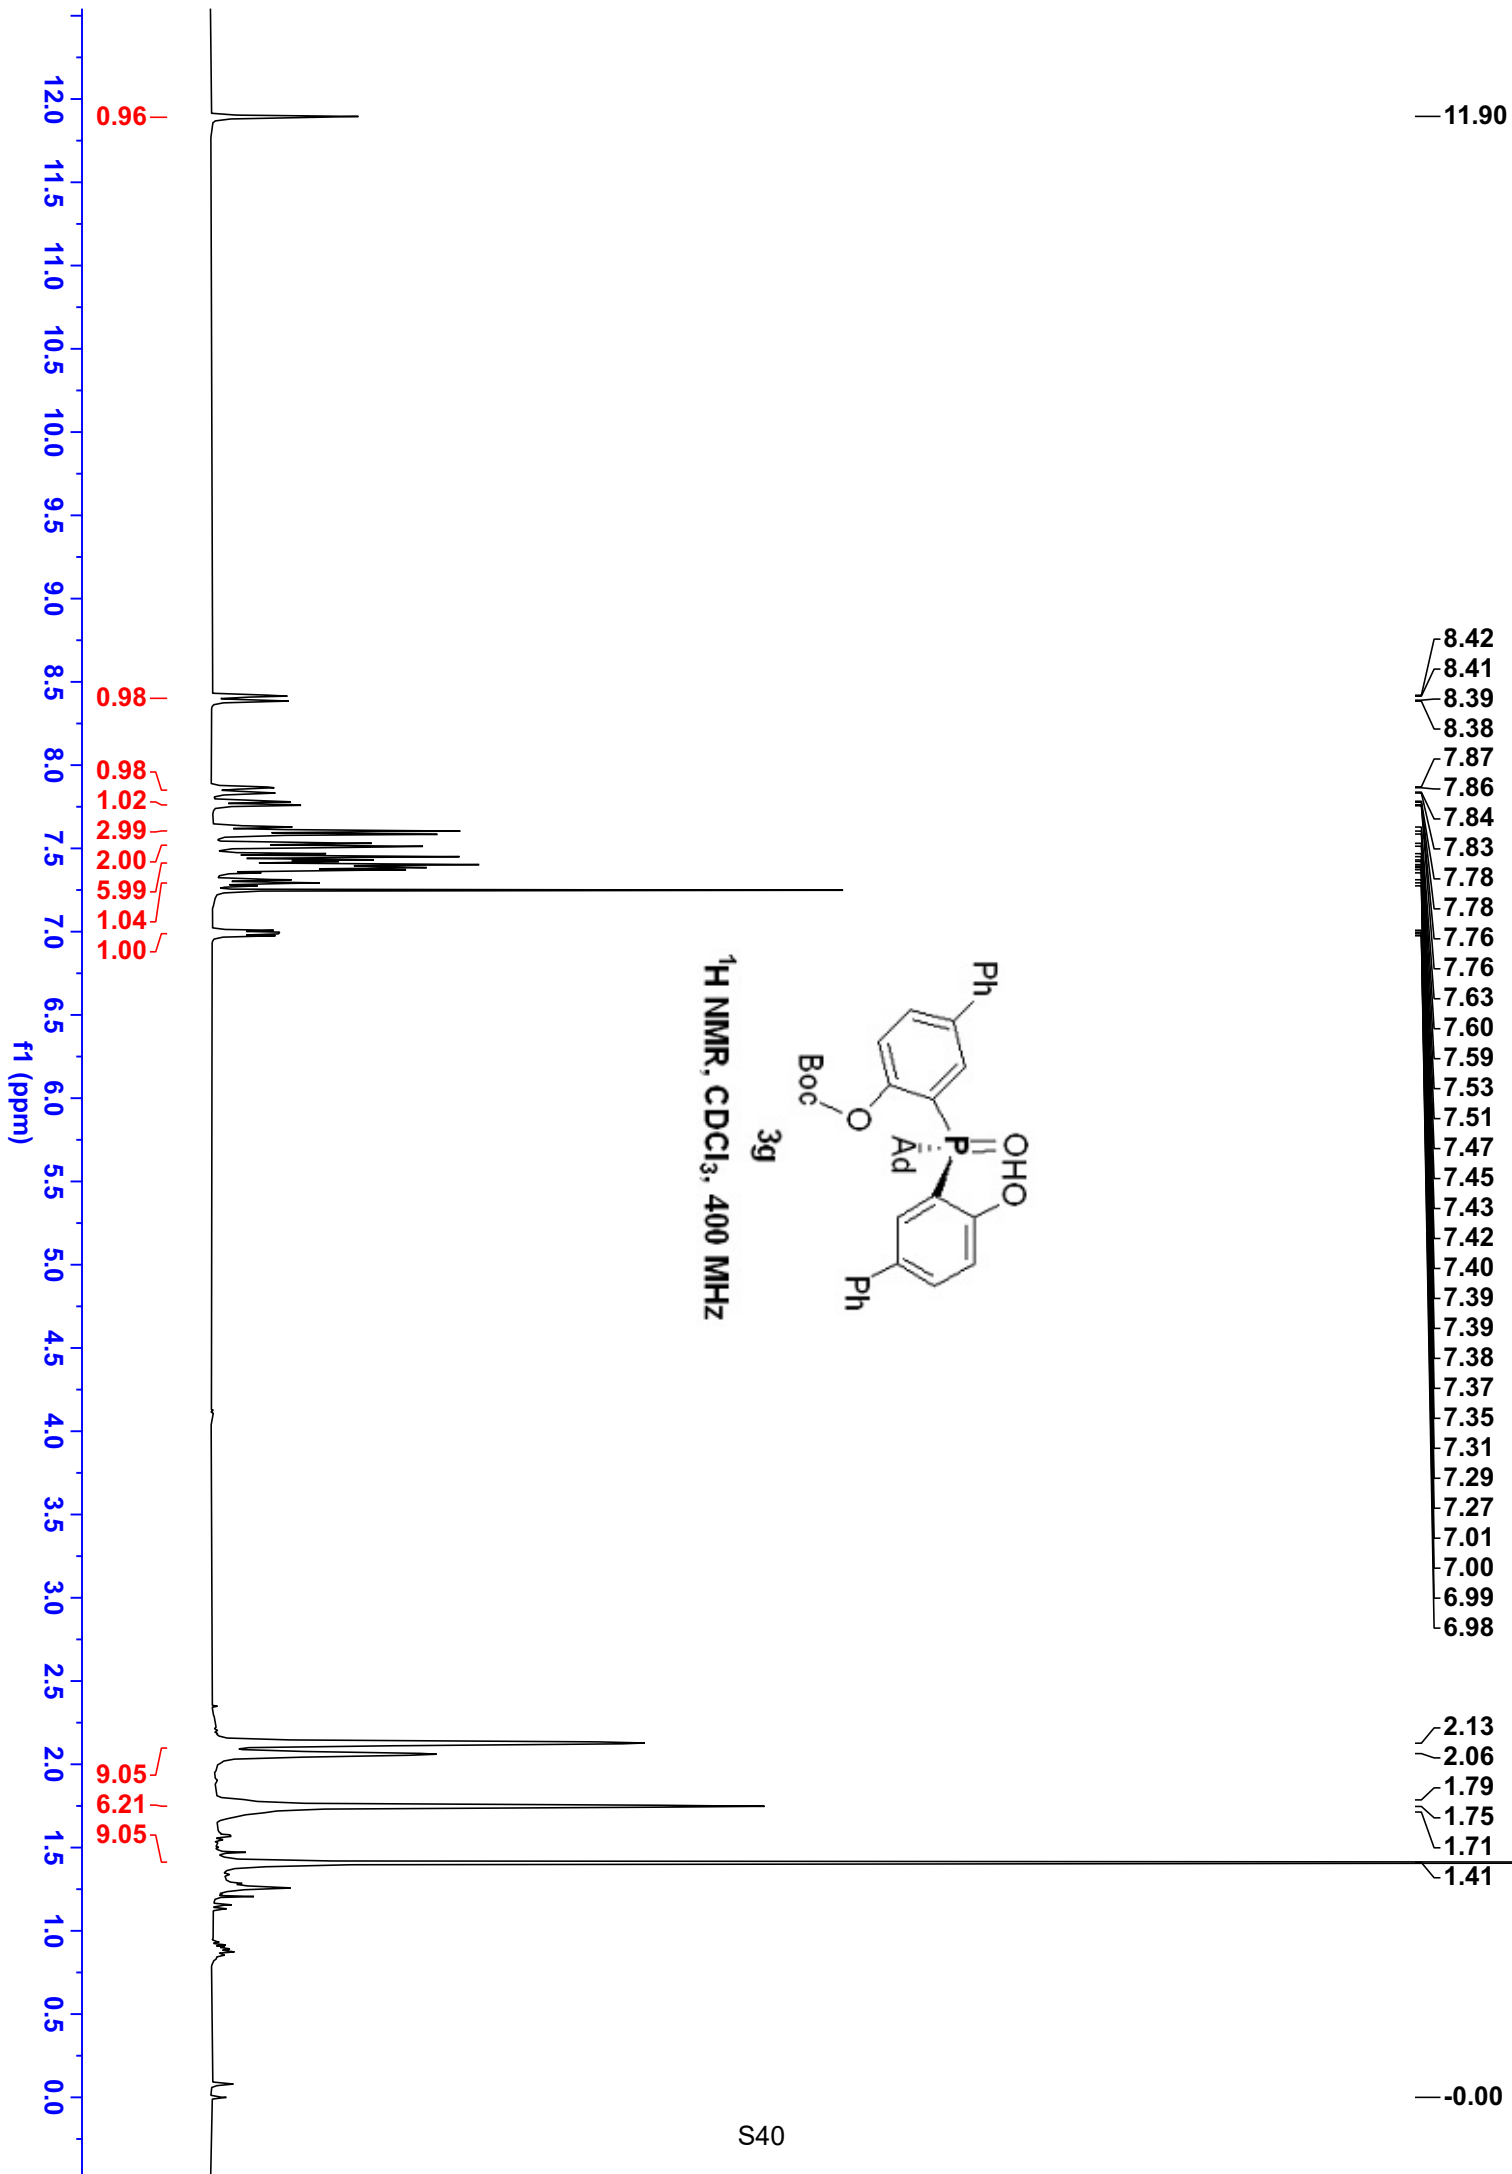



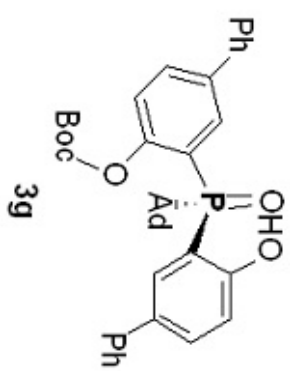

$^{31}\text{P}$  NMR,  $\text{CDCl}_3$ , 162 MHz



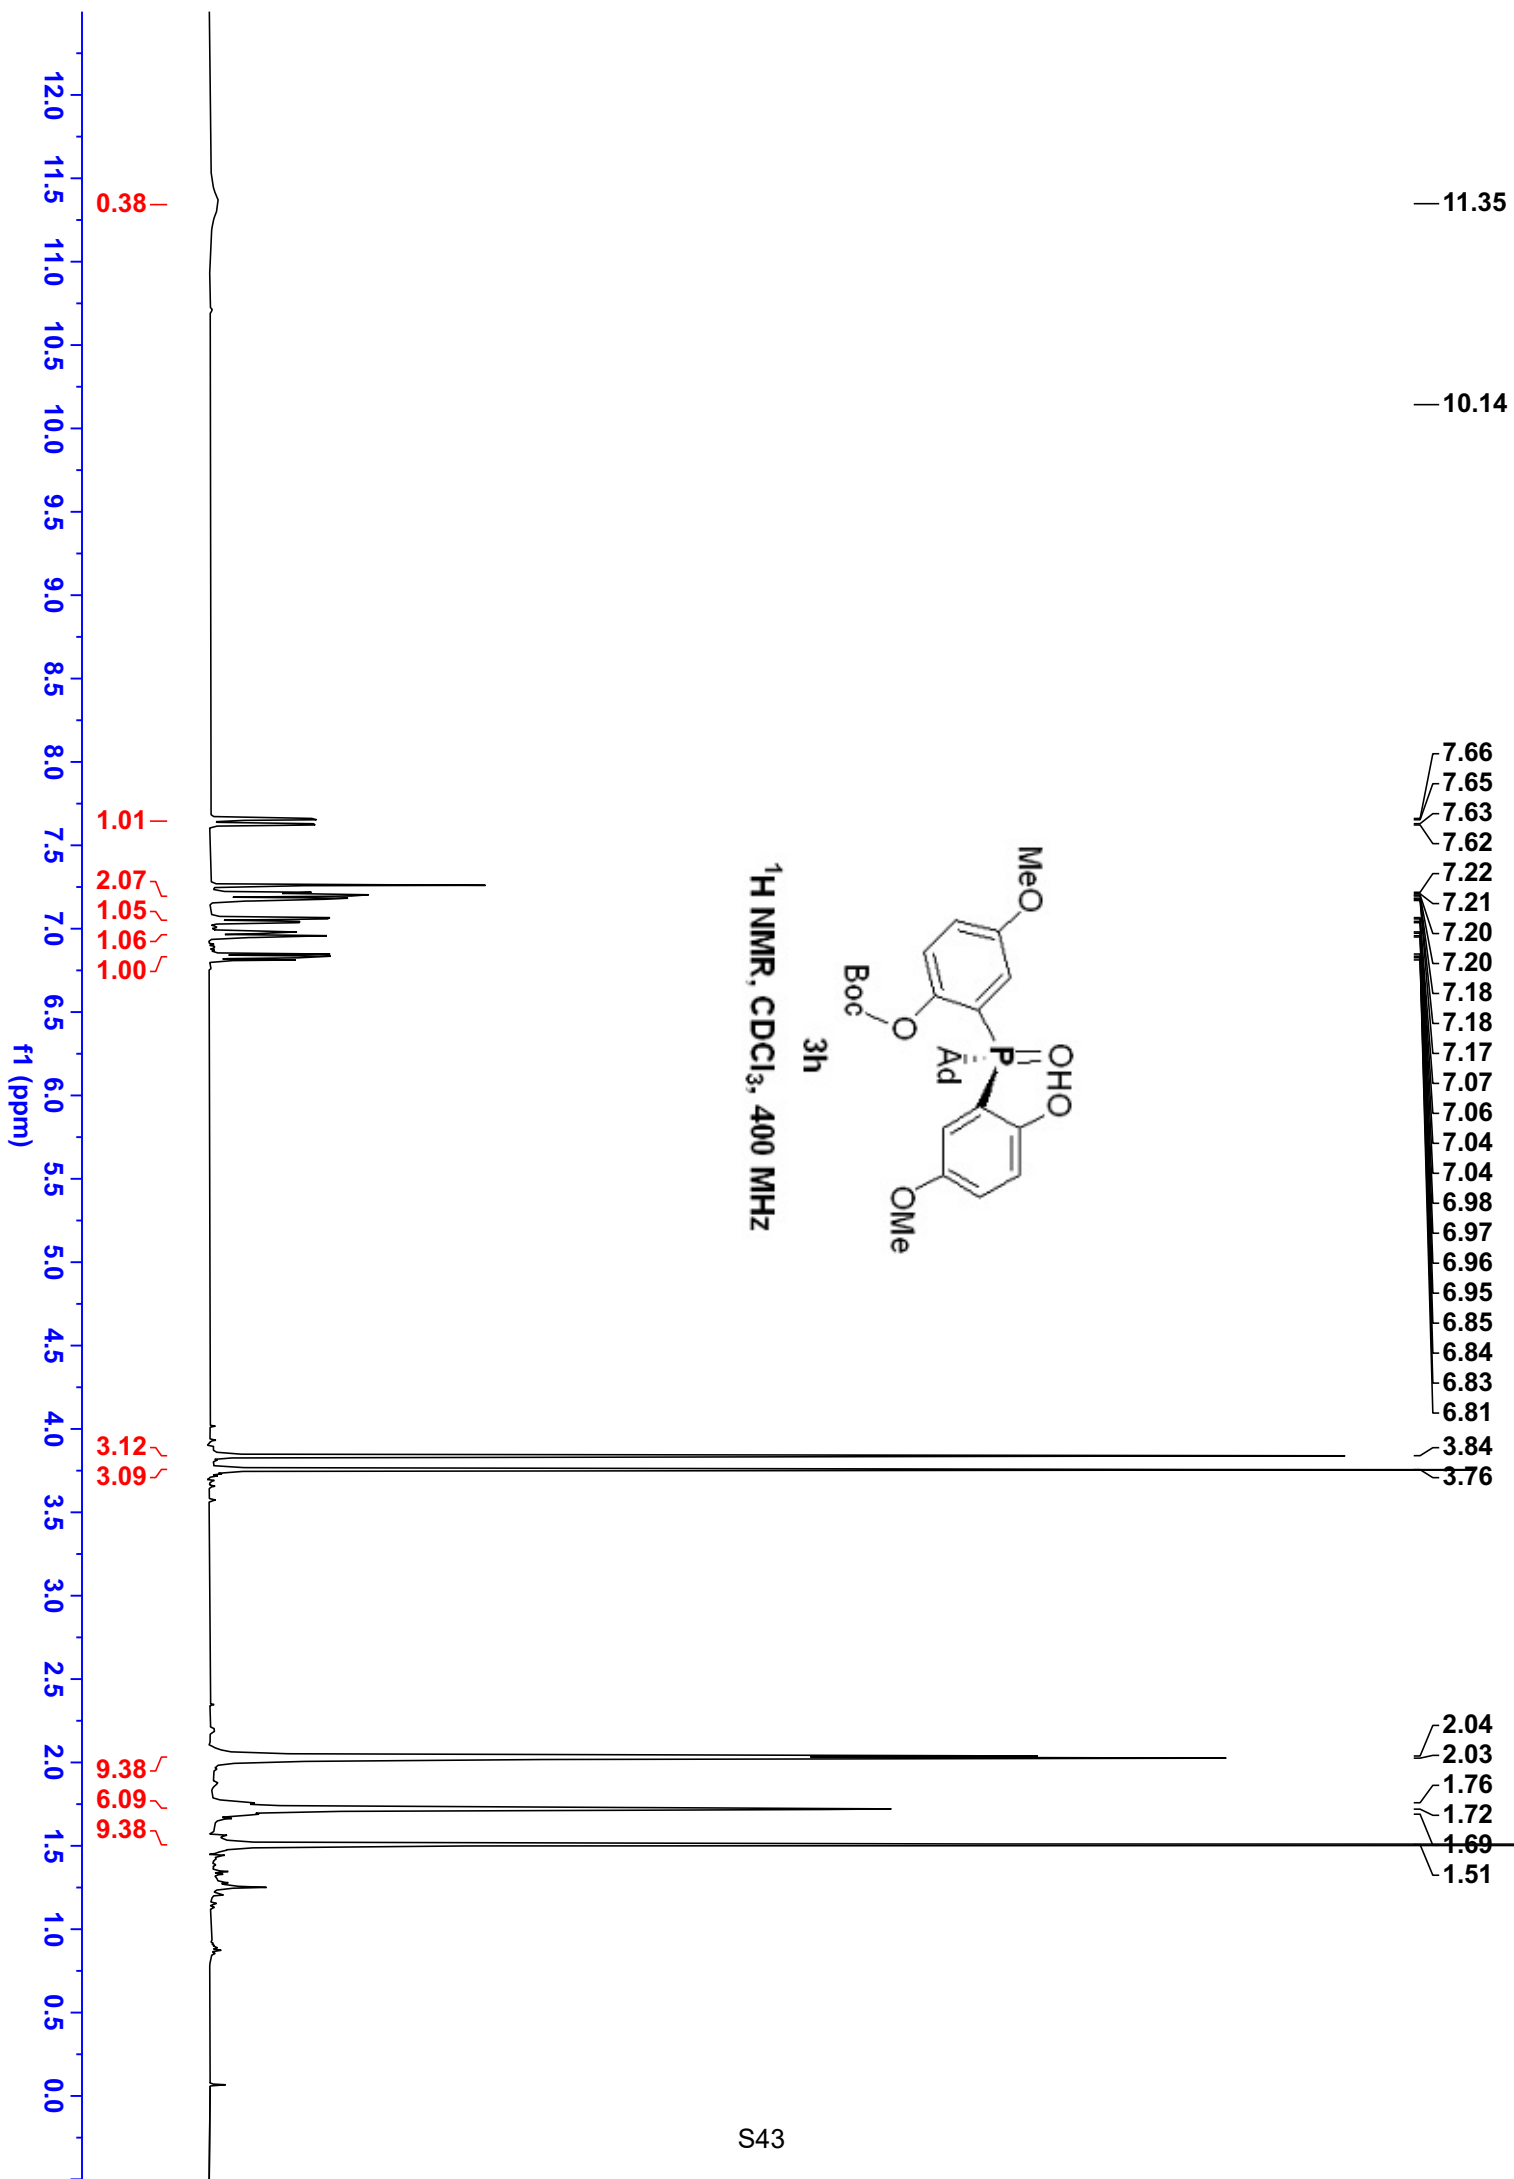

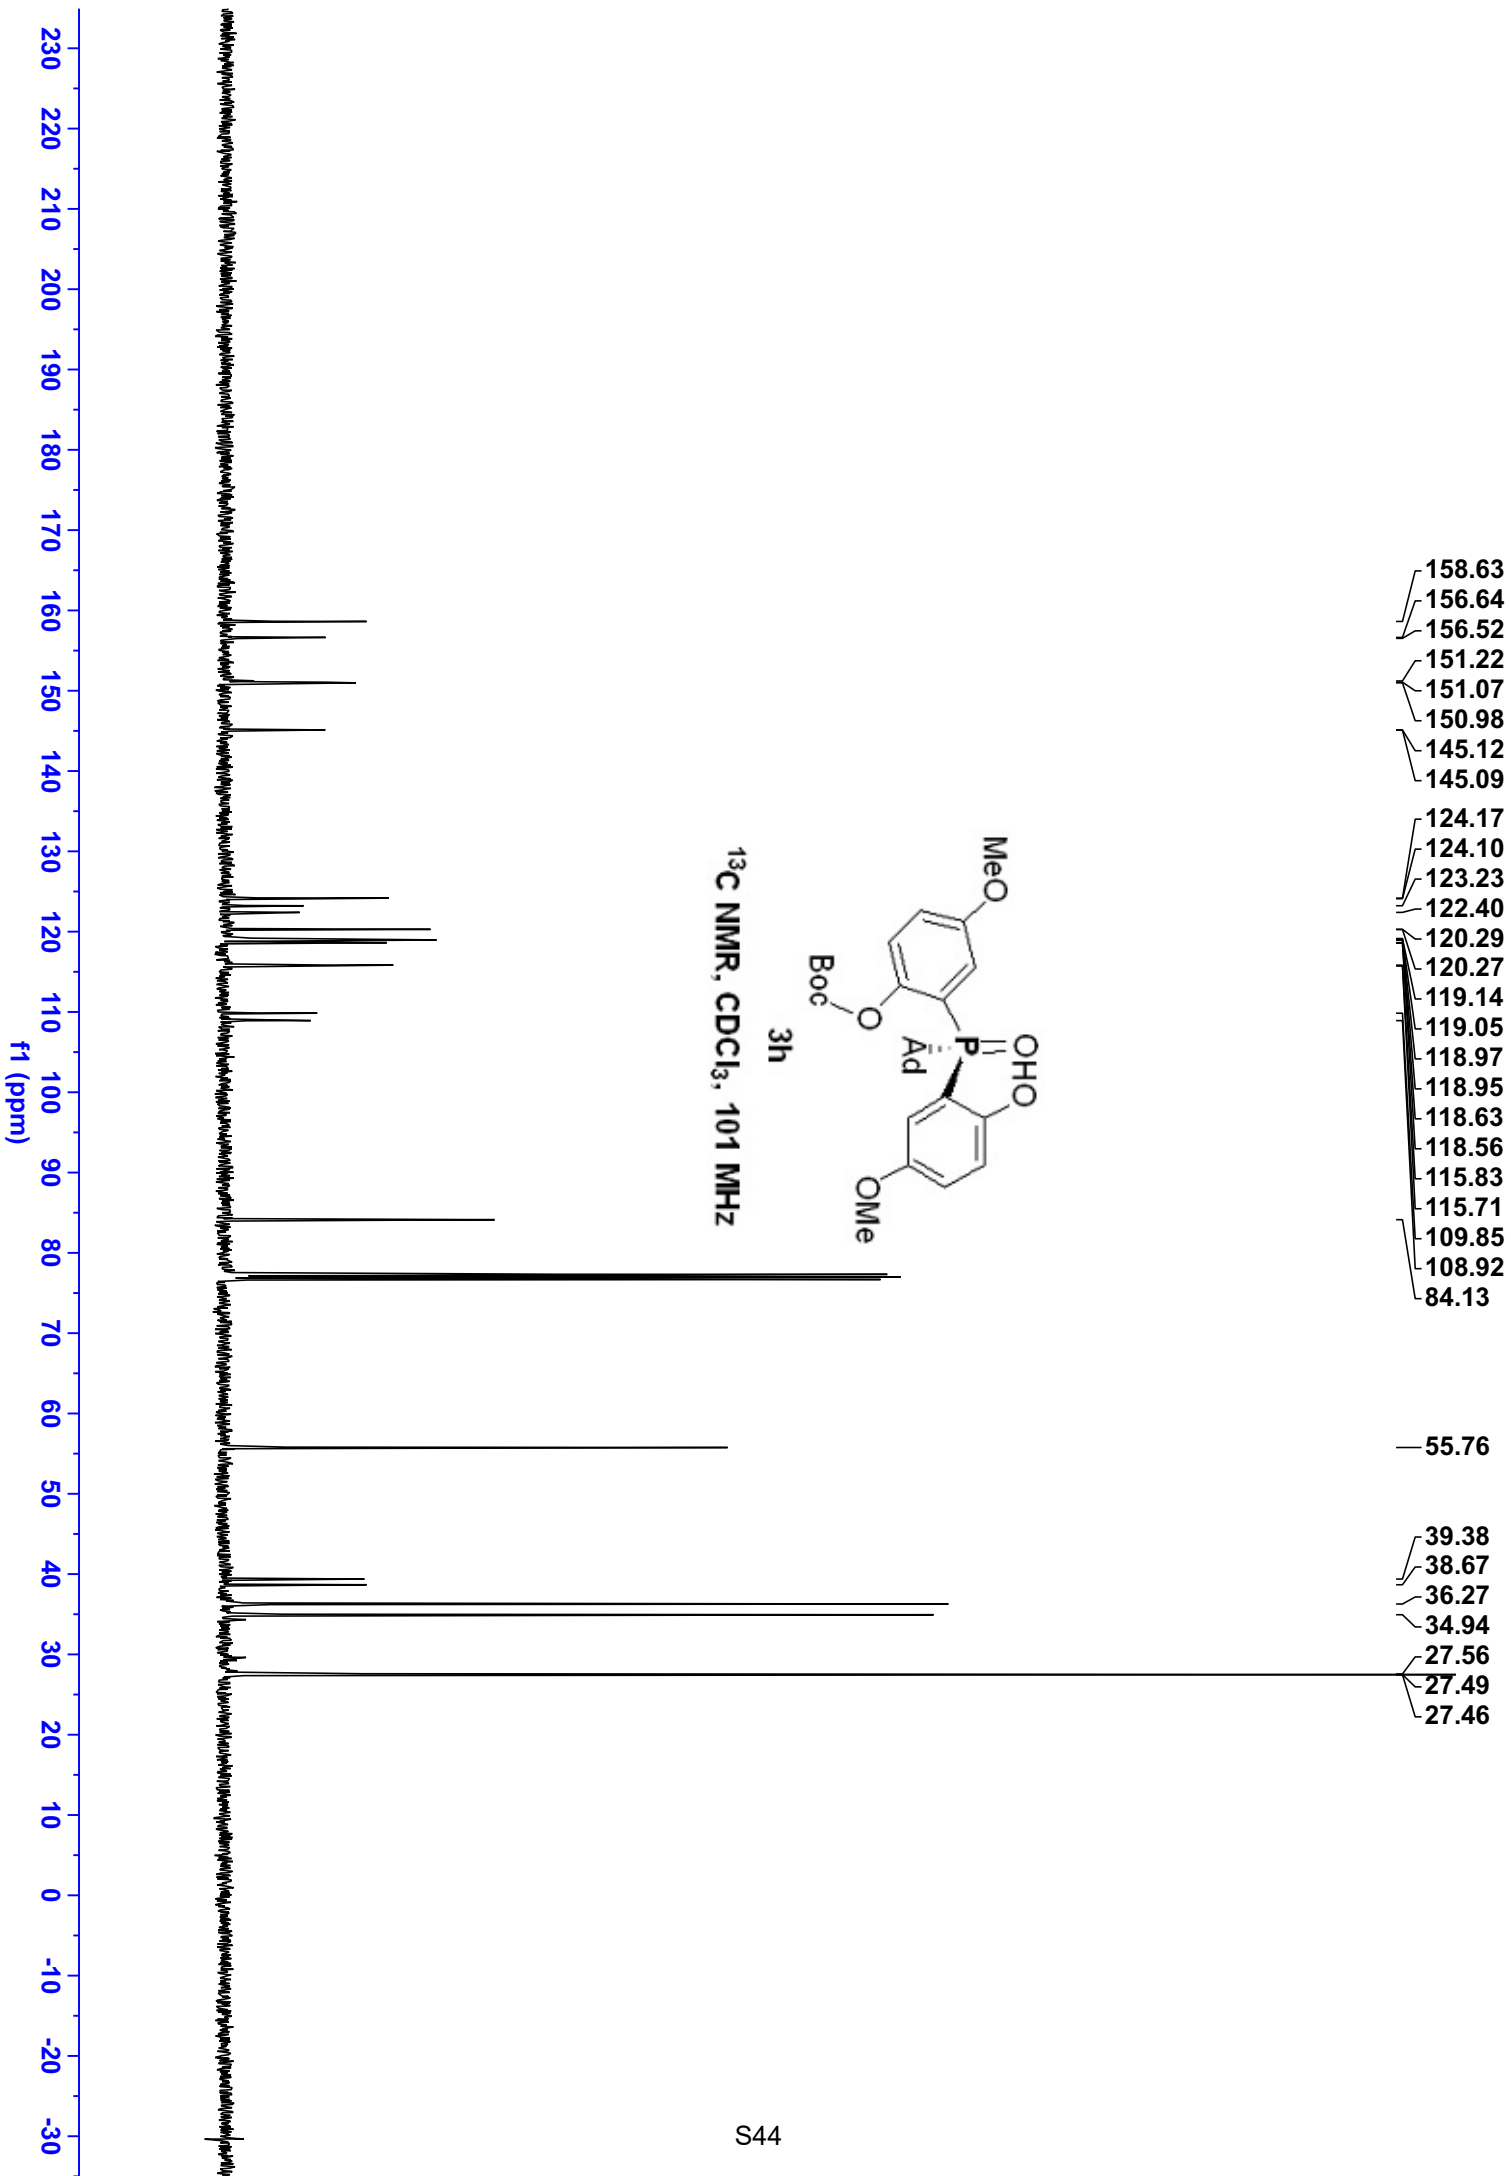

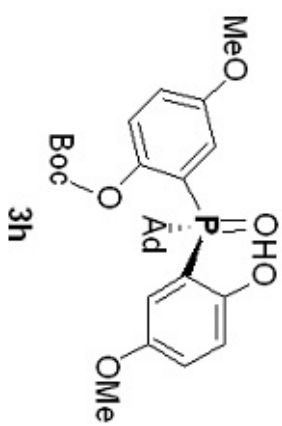

$^{31}\text{P}$  NMR,  $\text{CDCl}_3$ , 162 MHz



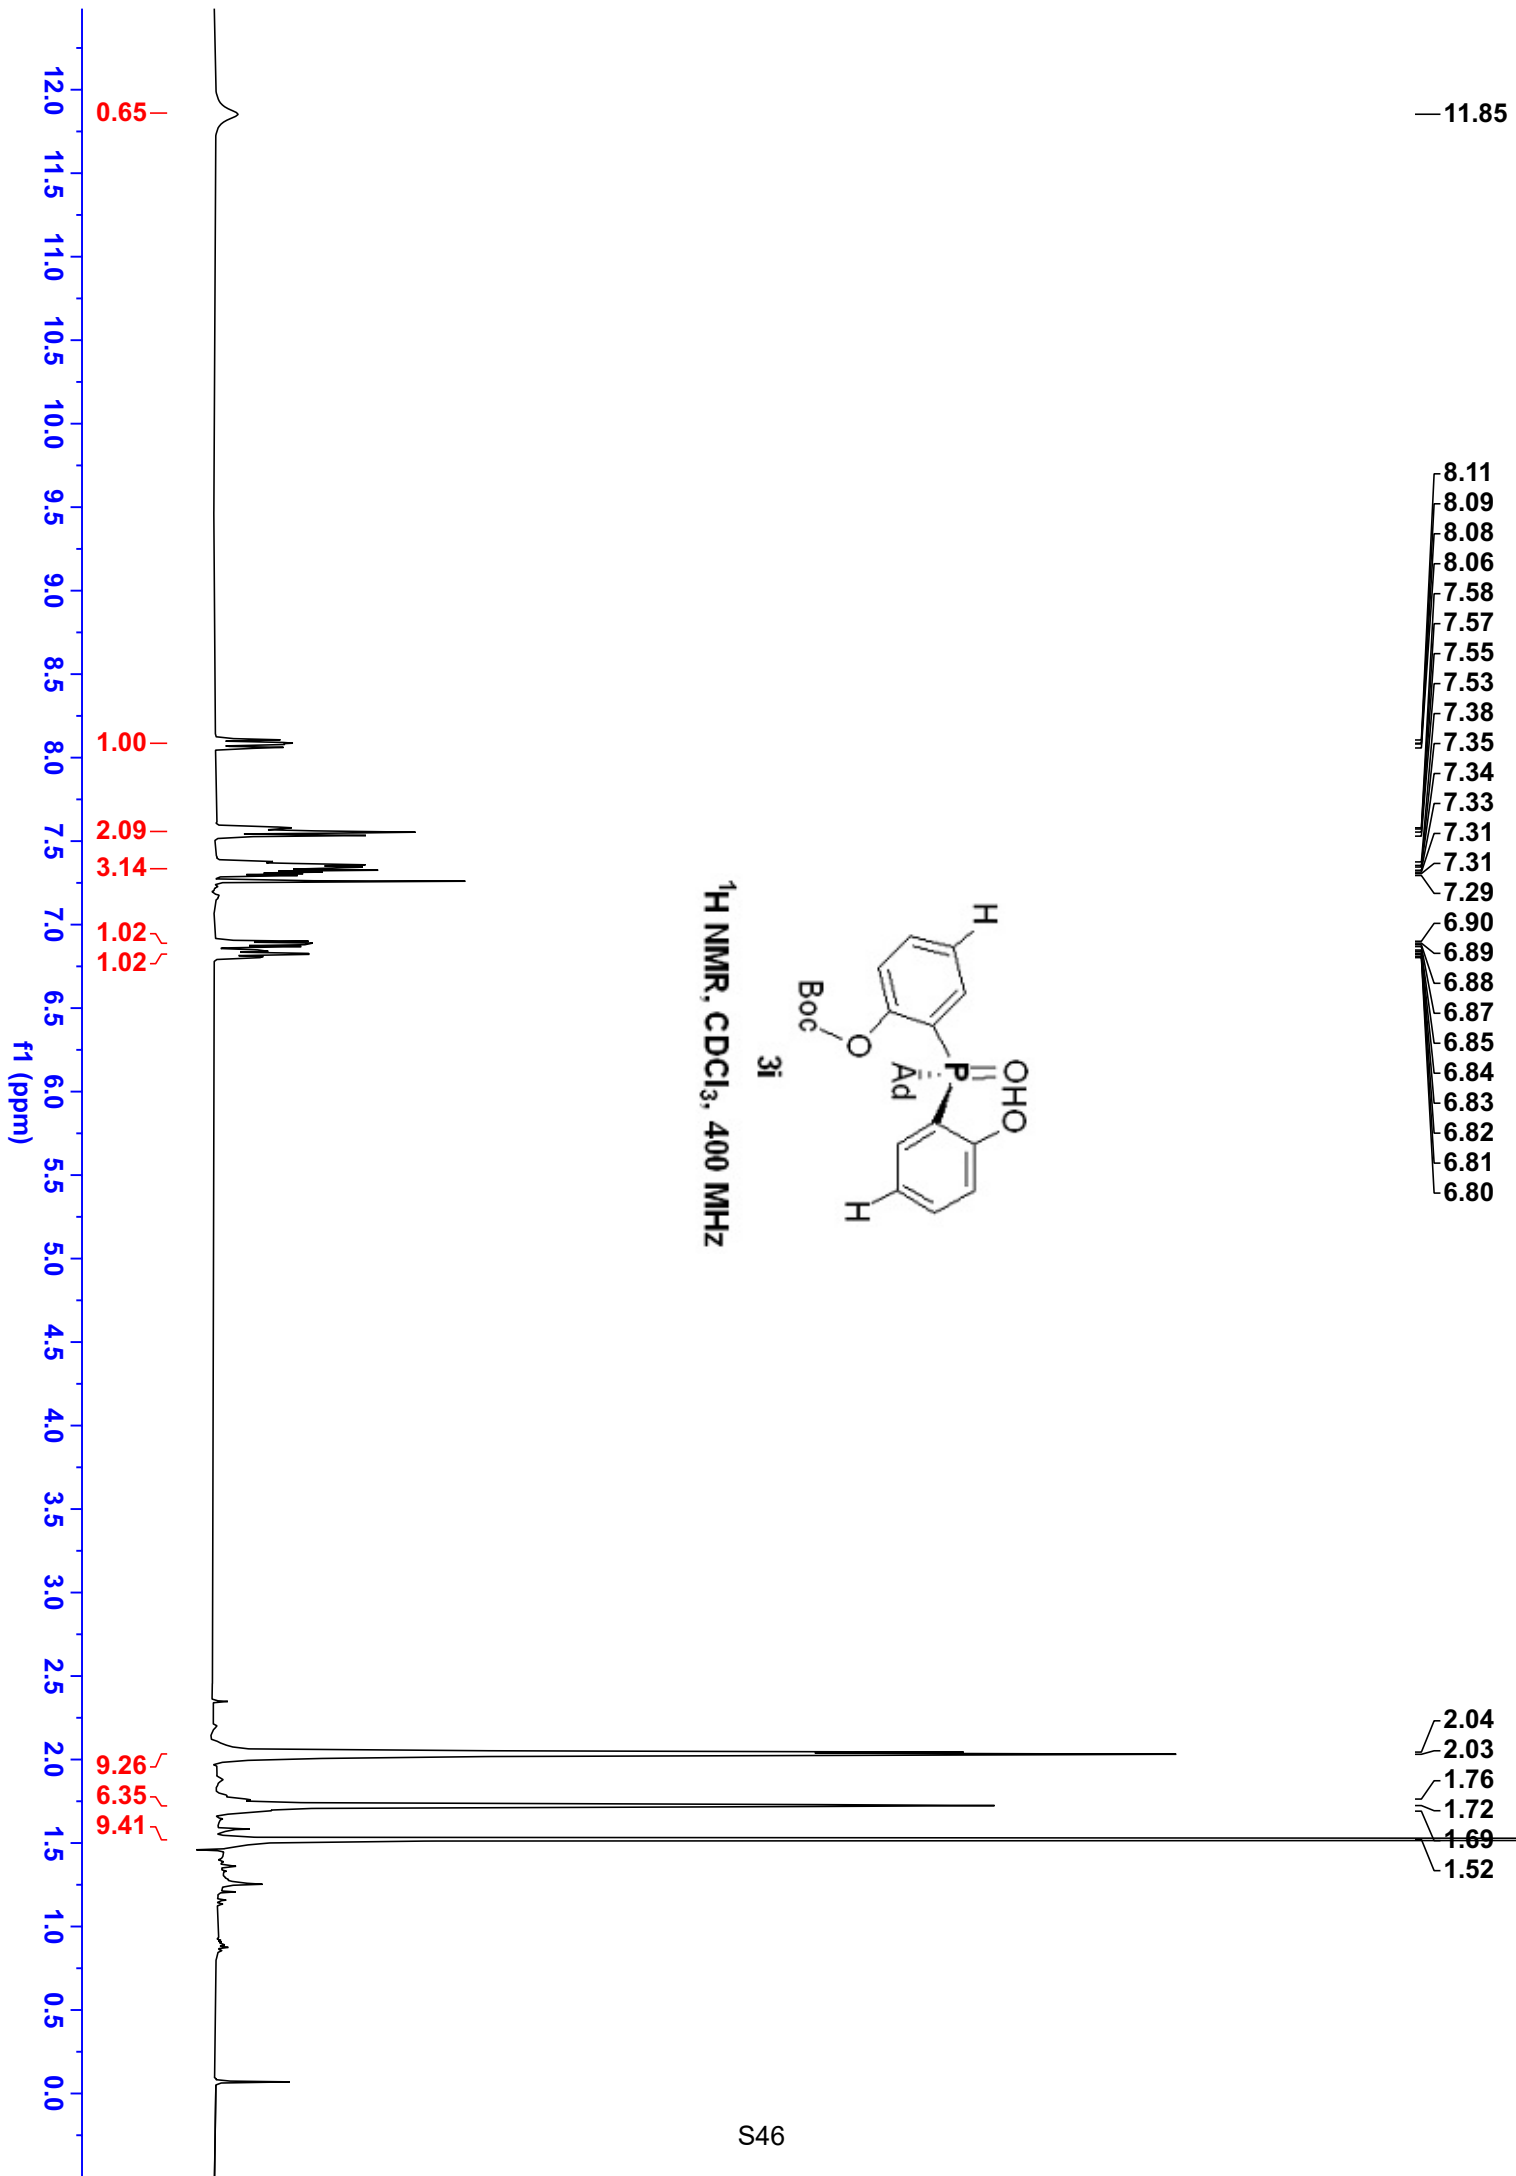

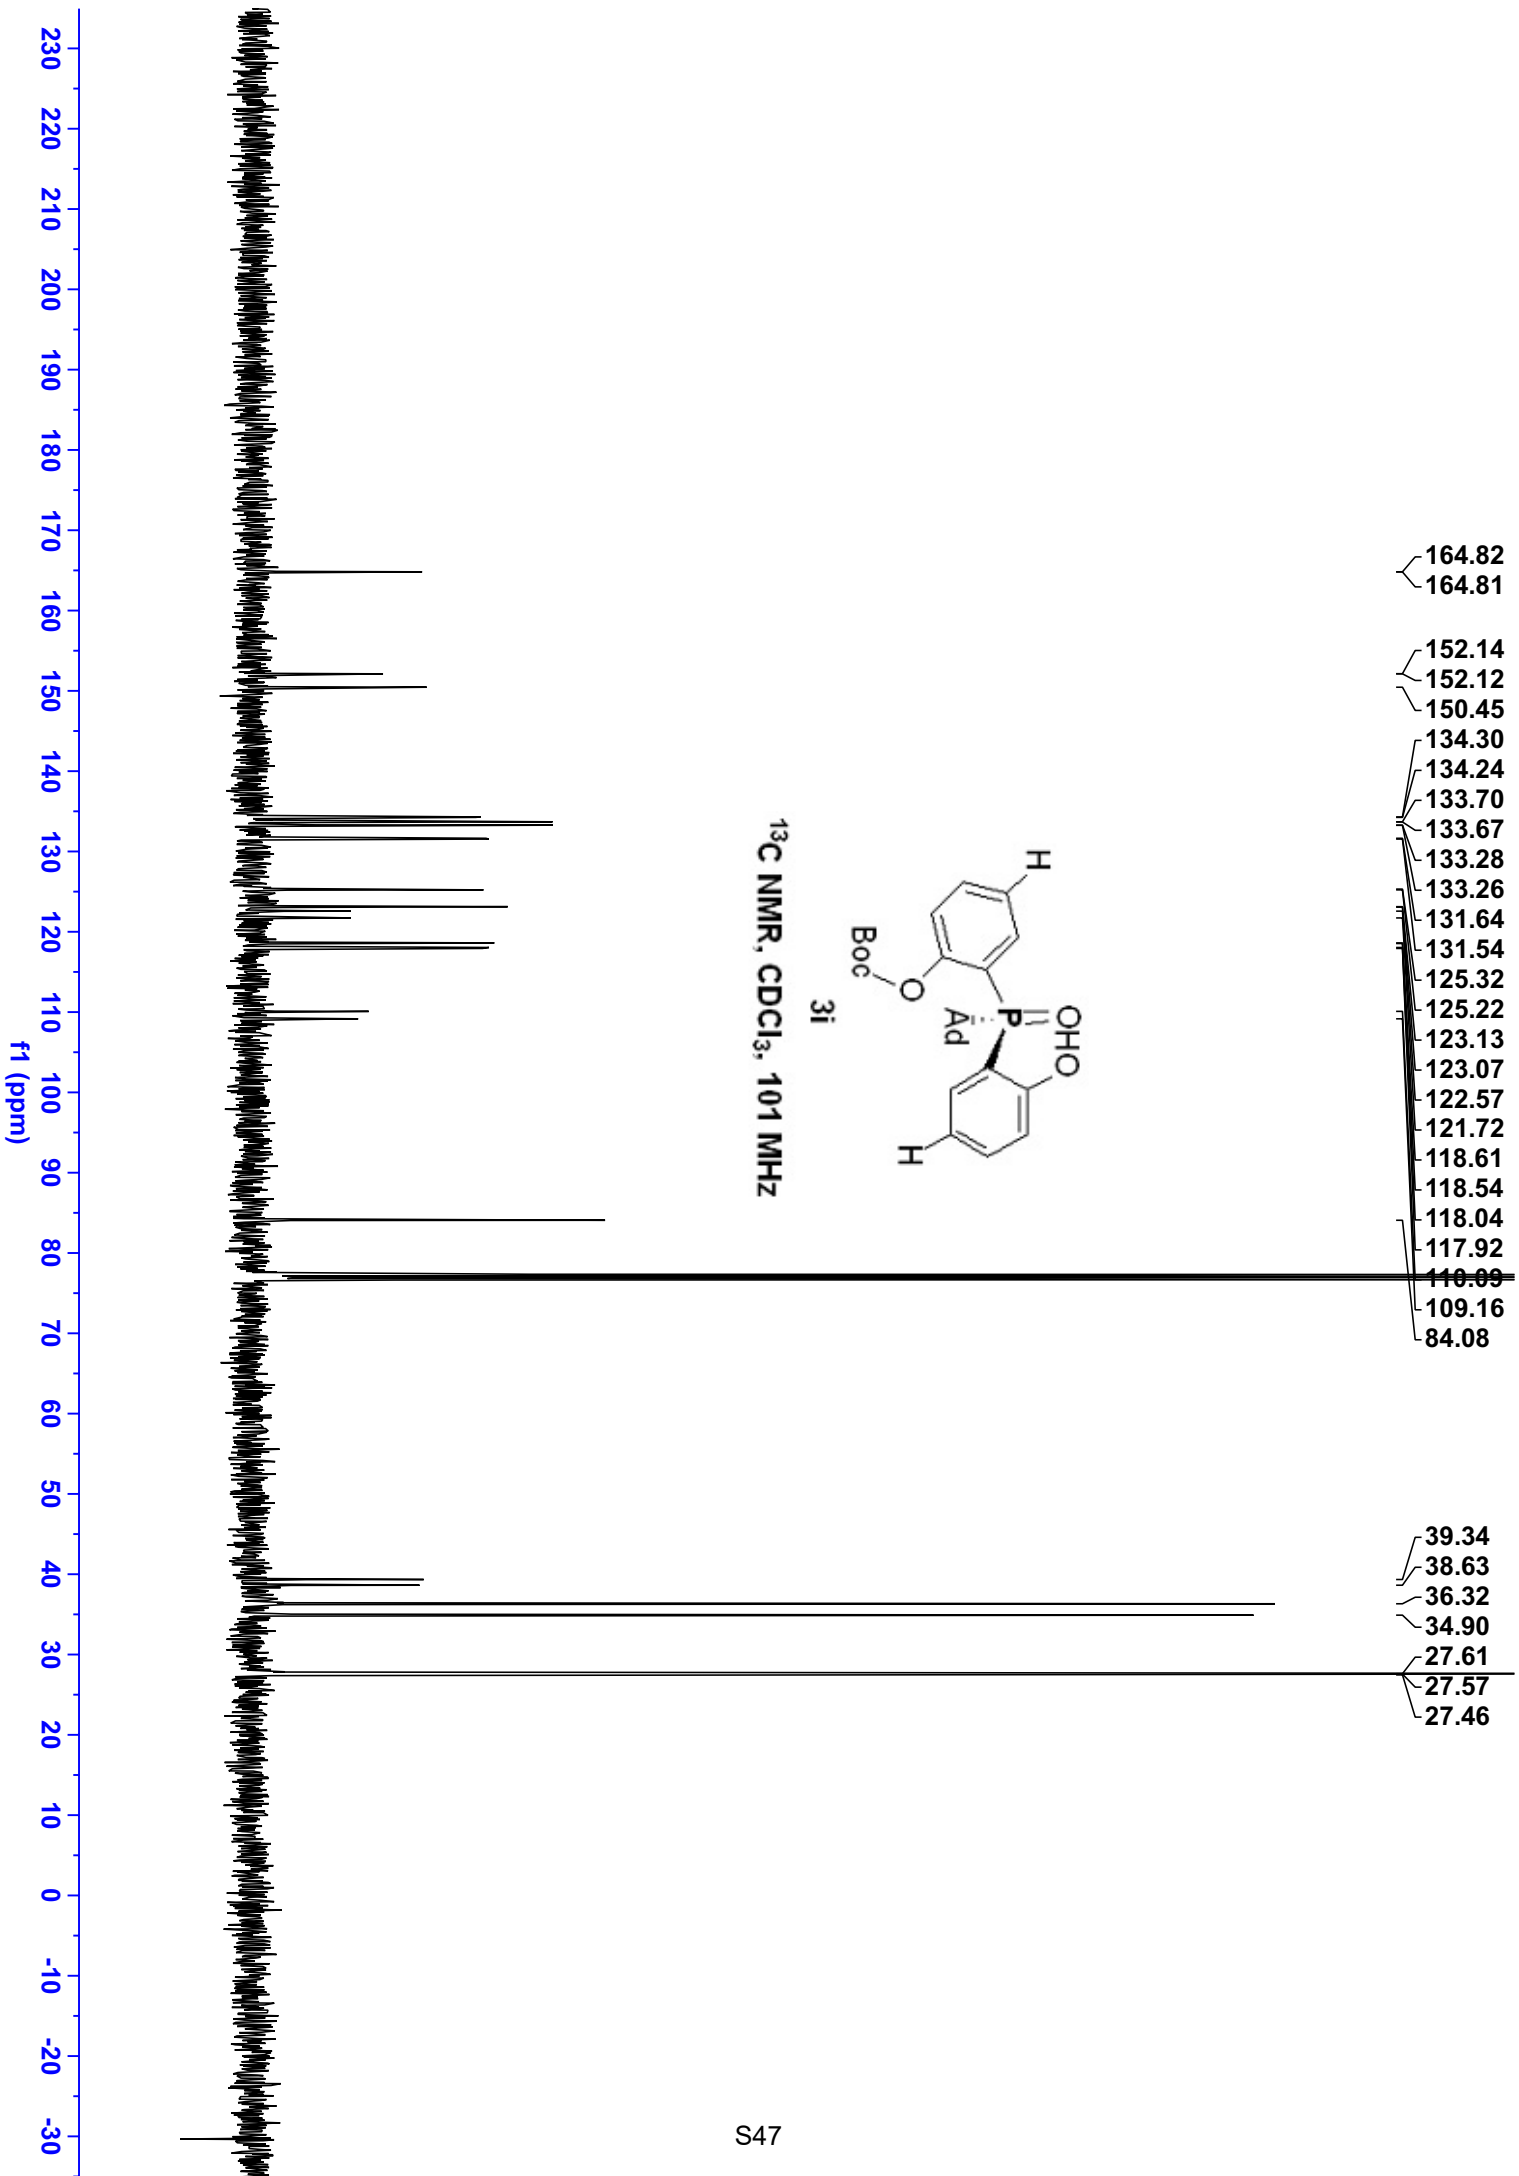

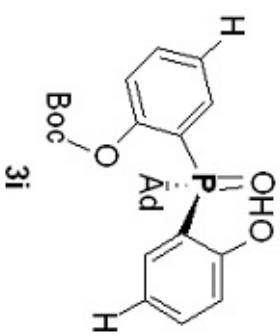

$^{31}\text{P}$  NMR,  $\text{CDCl}_3$ , 162 MHz



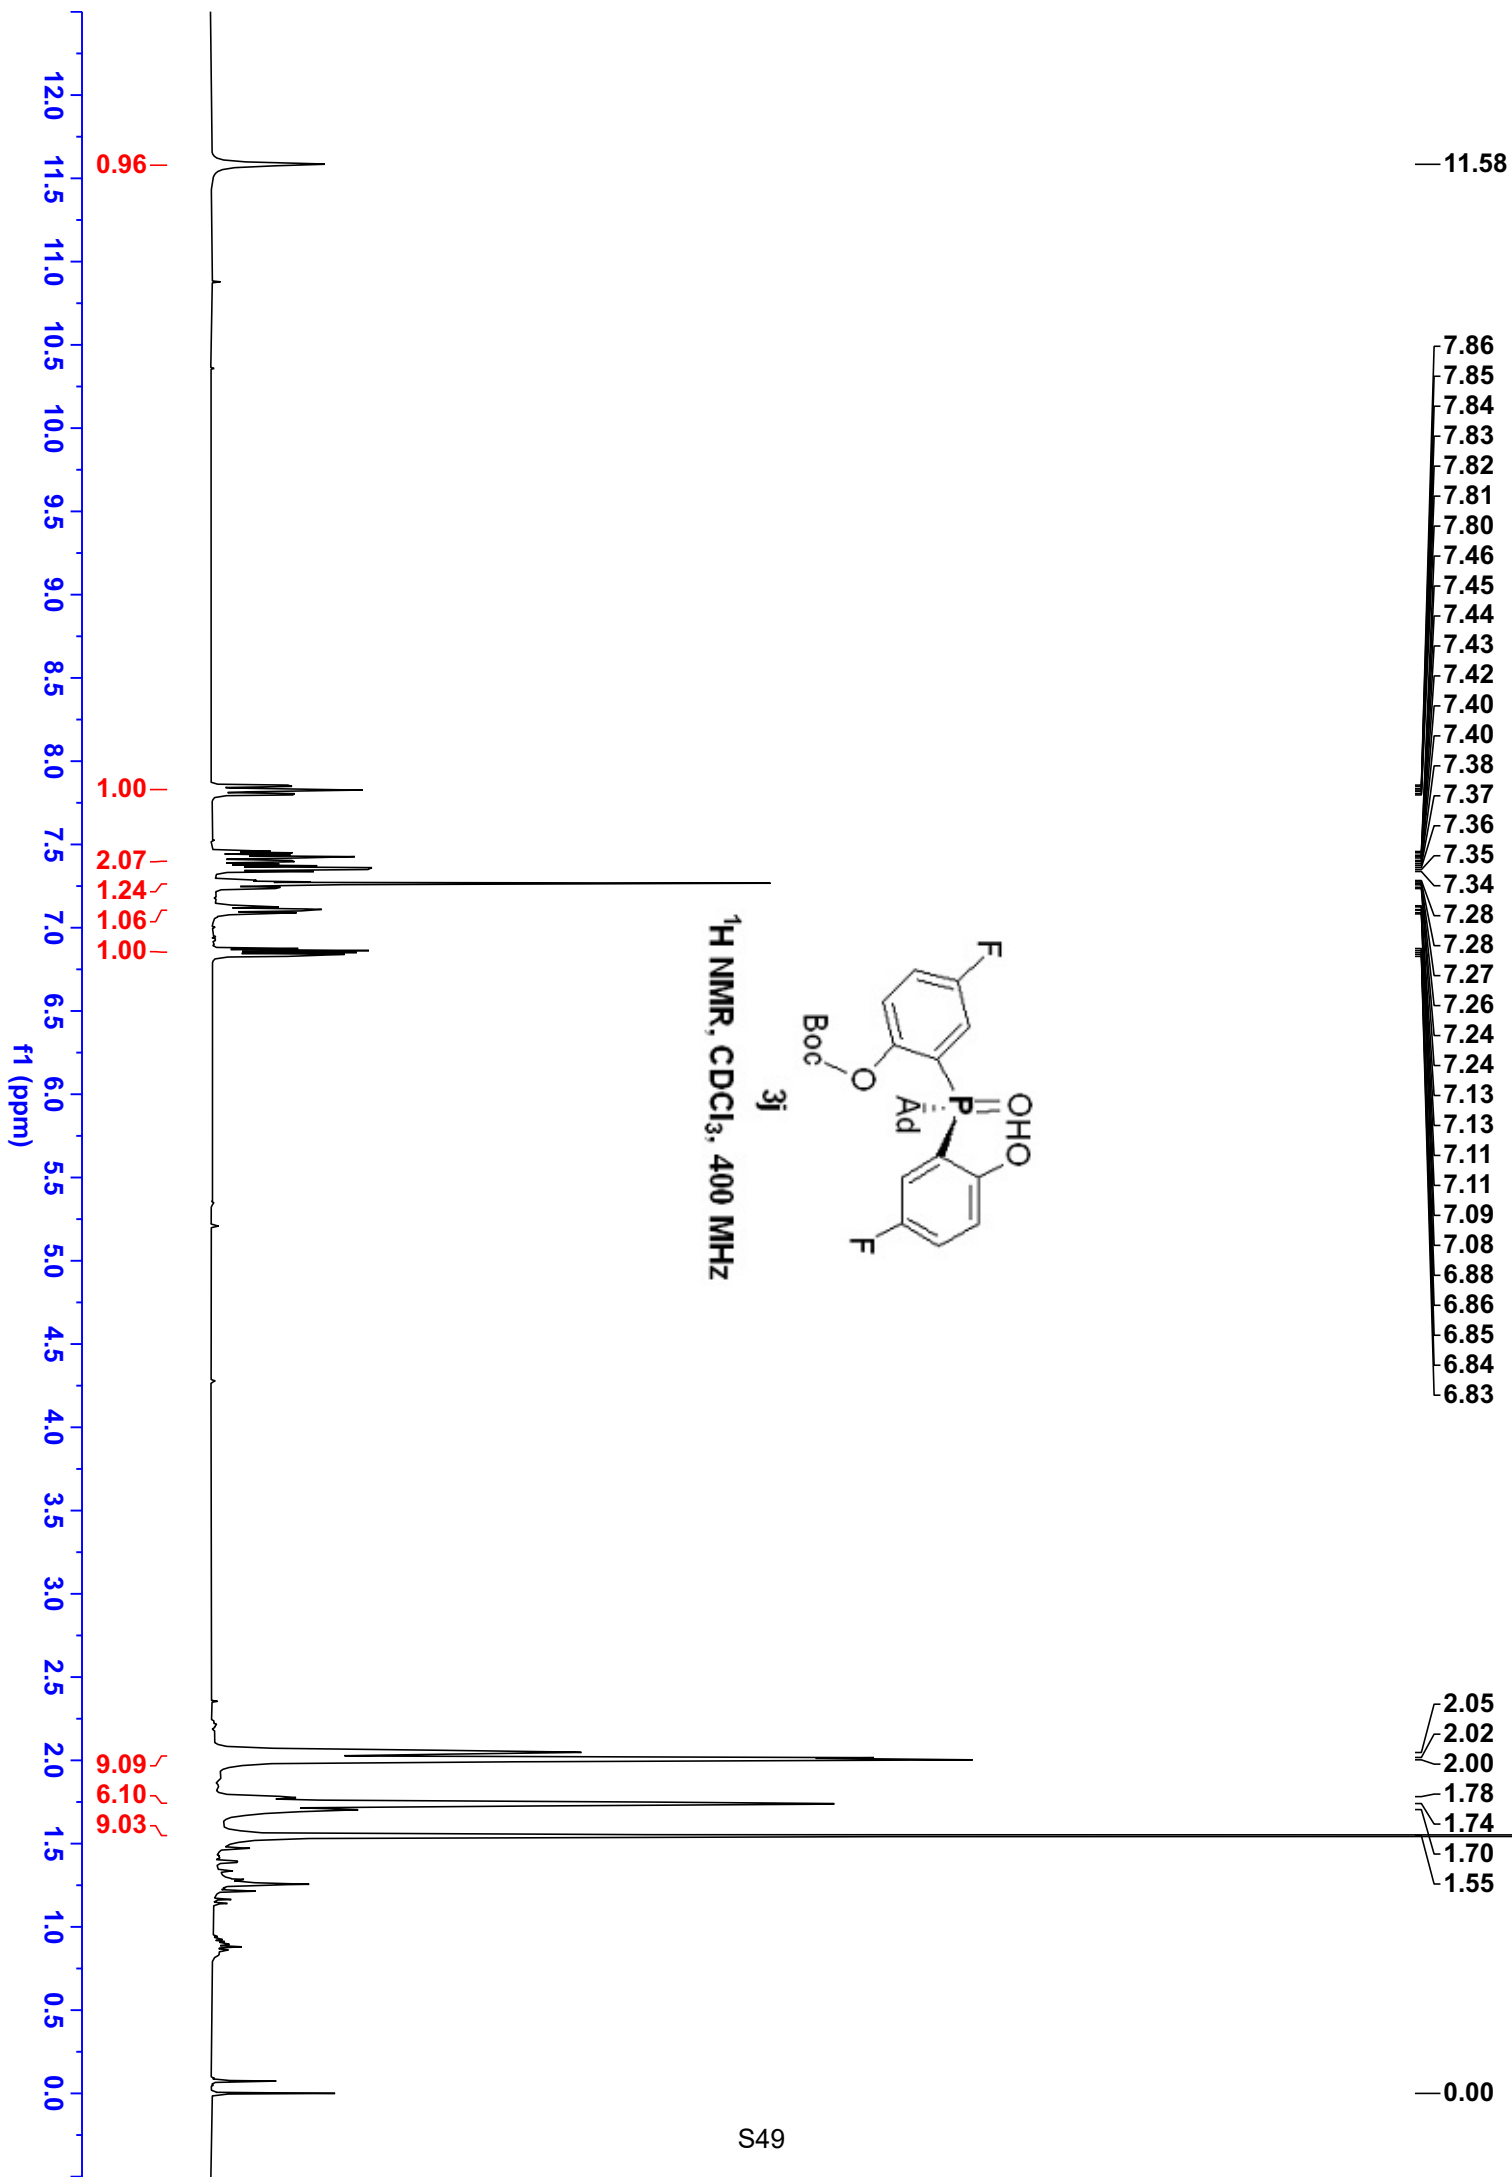

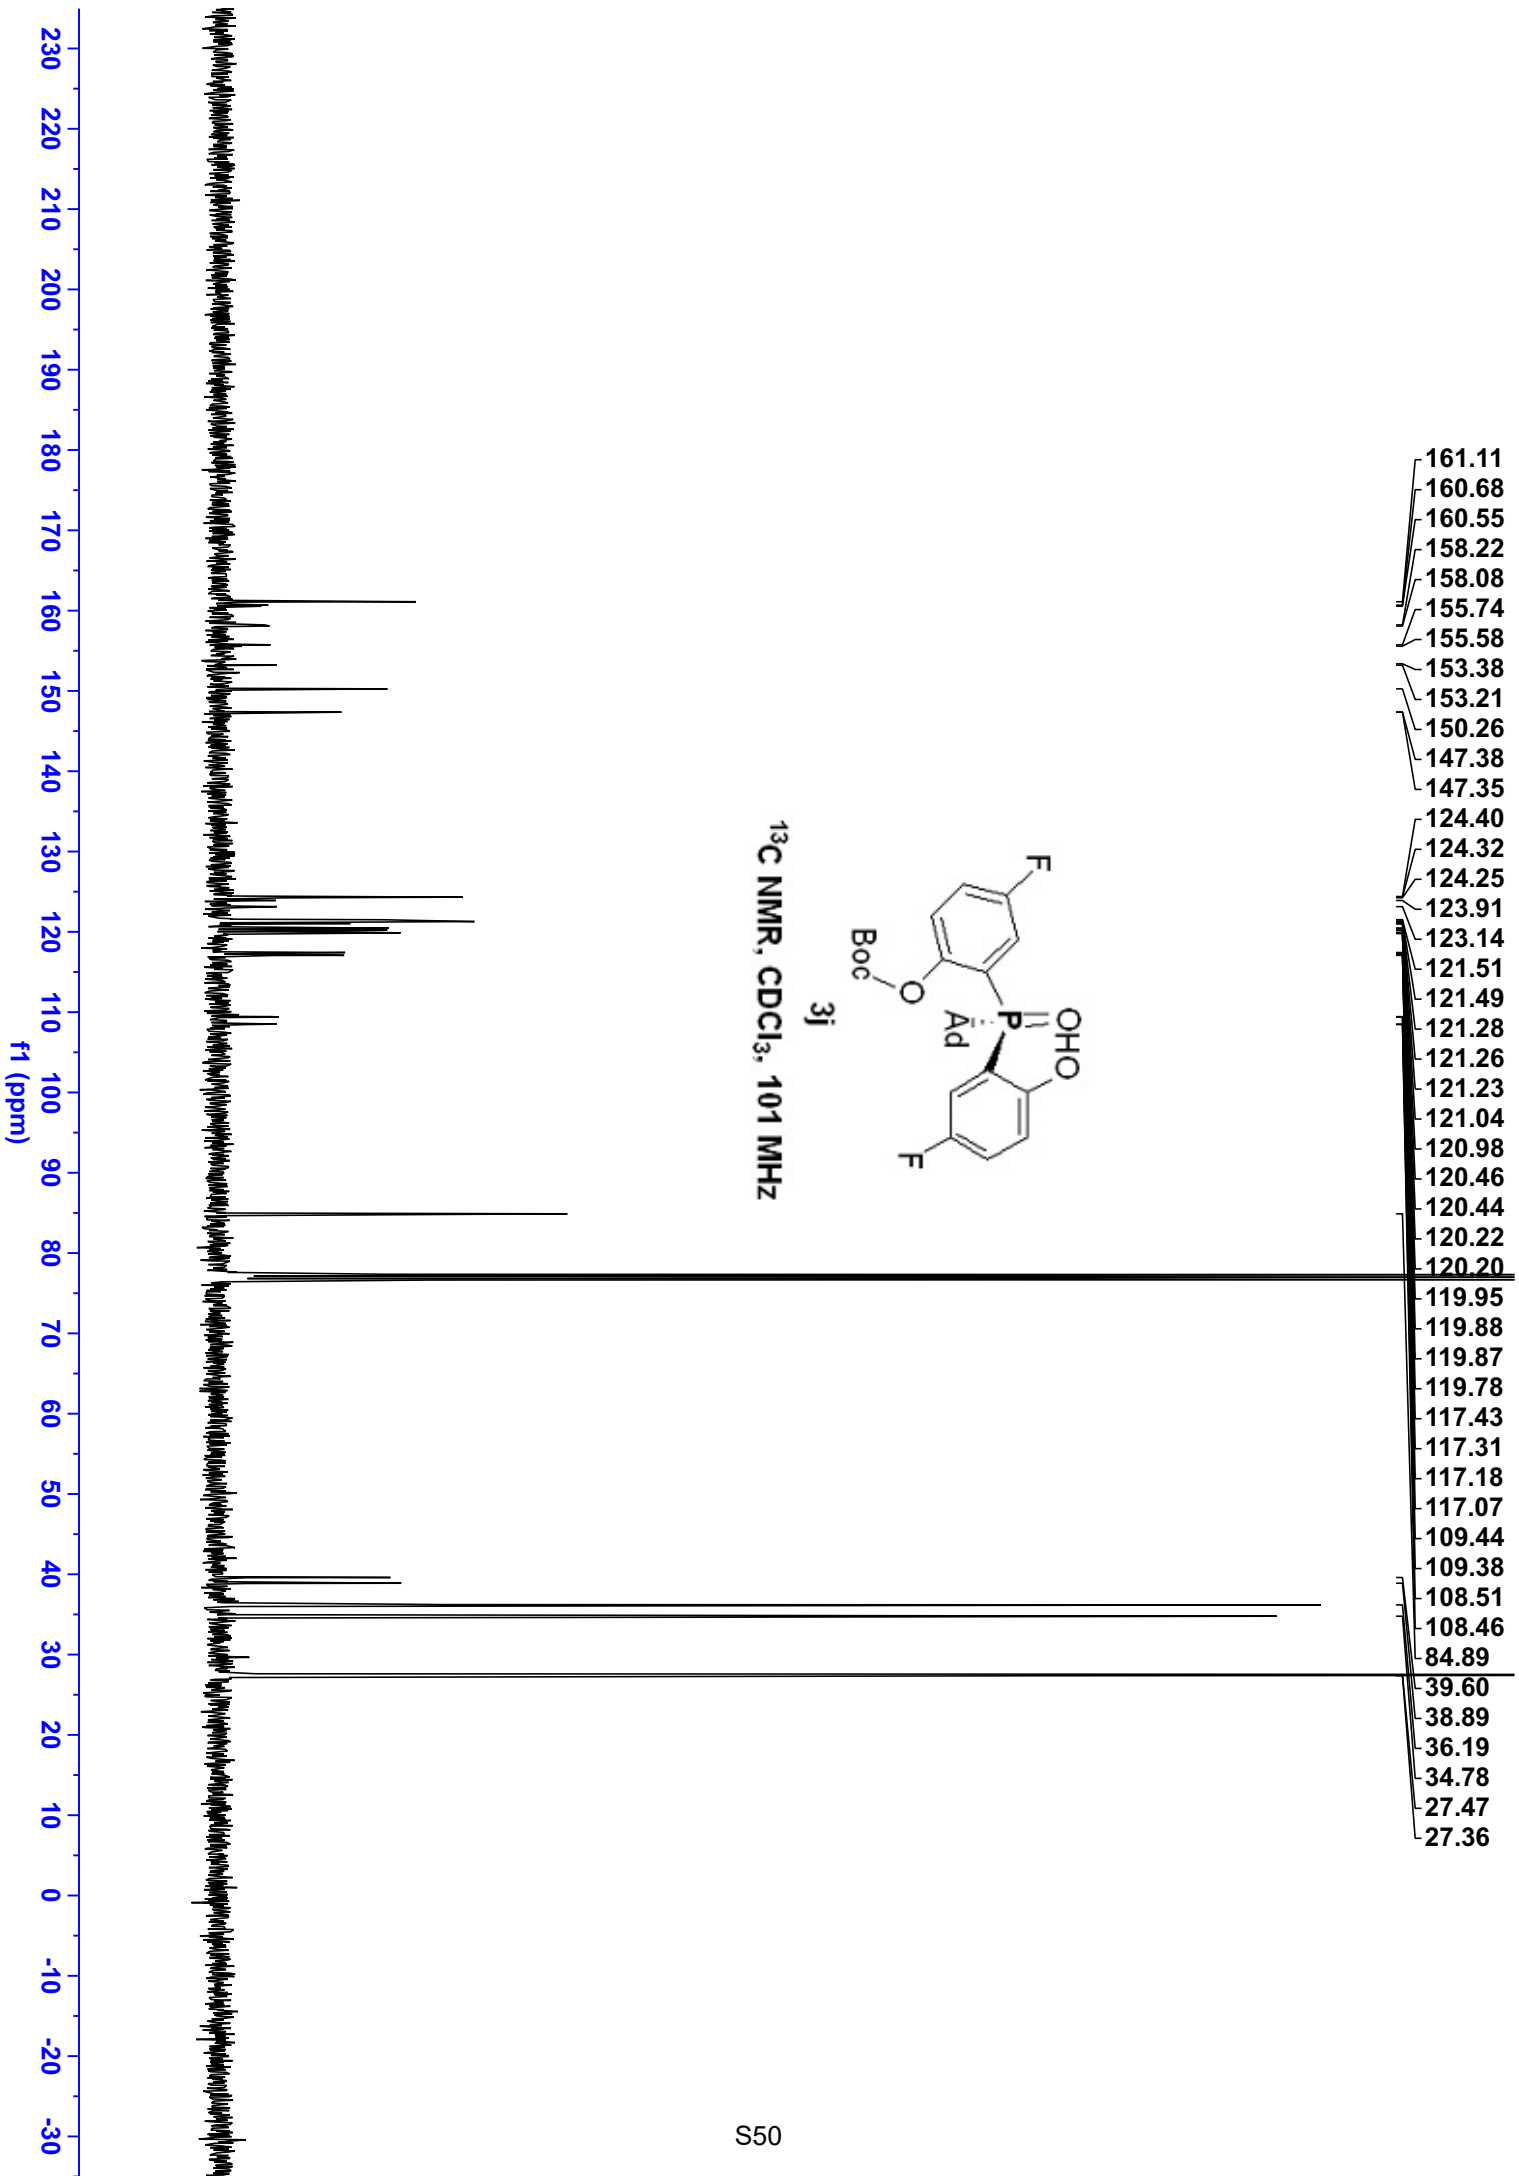

-115.30  
-115.31  
-124.27  
-124.29

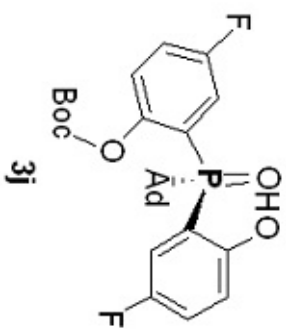

<sup>19</sup>F NMR, CDCl<sub>3</sub>, 377 MHz

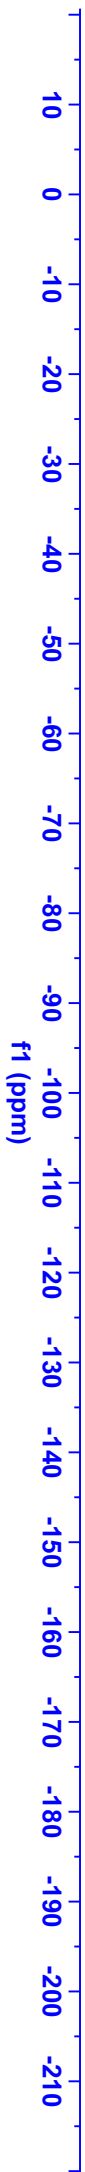

45.59  
45.57  
45.56  
45.54

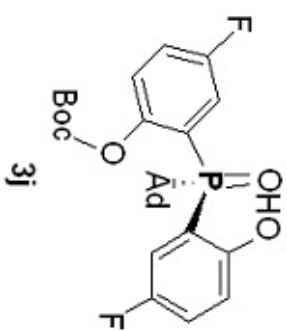

$^{31}\text{P}$  NMR,  $\text{CDCl}_3$ , 162 MHz



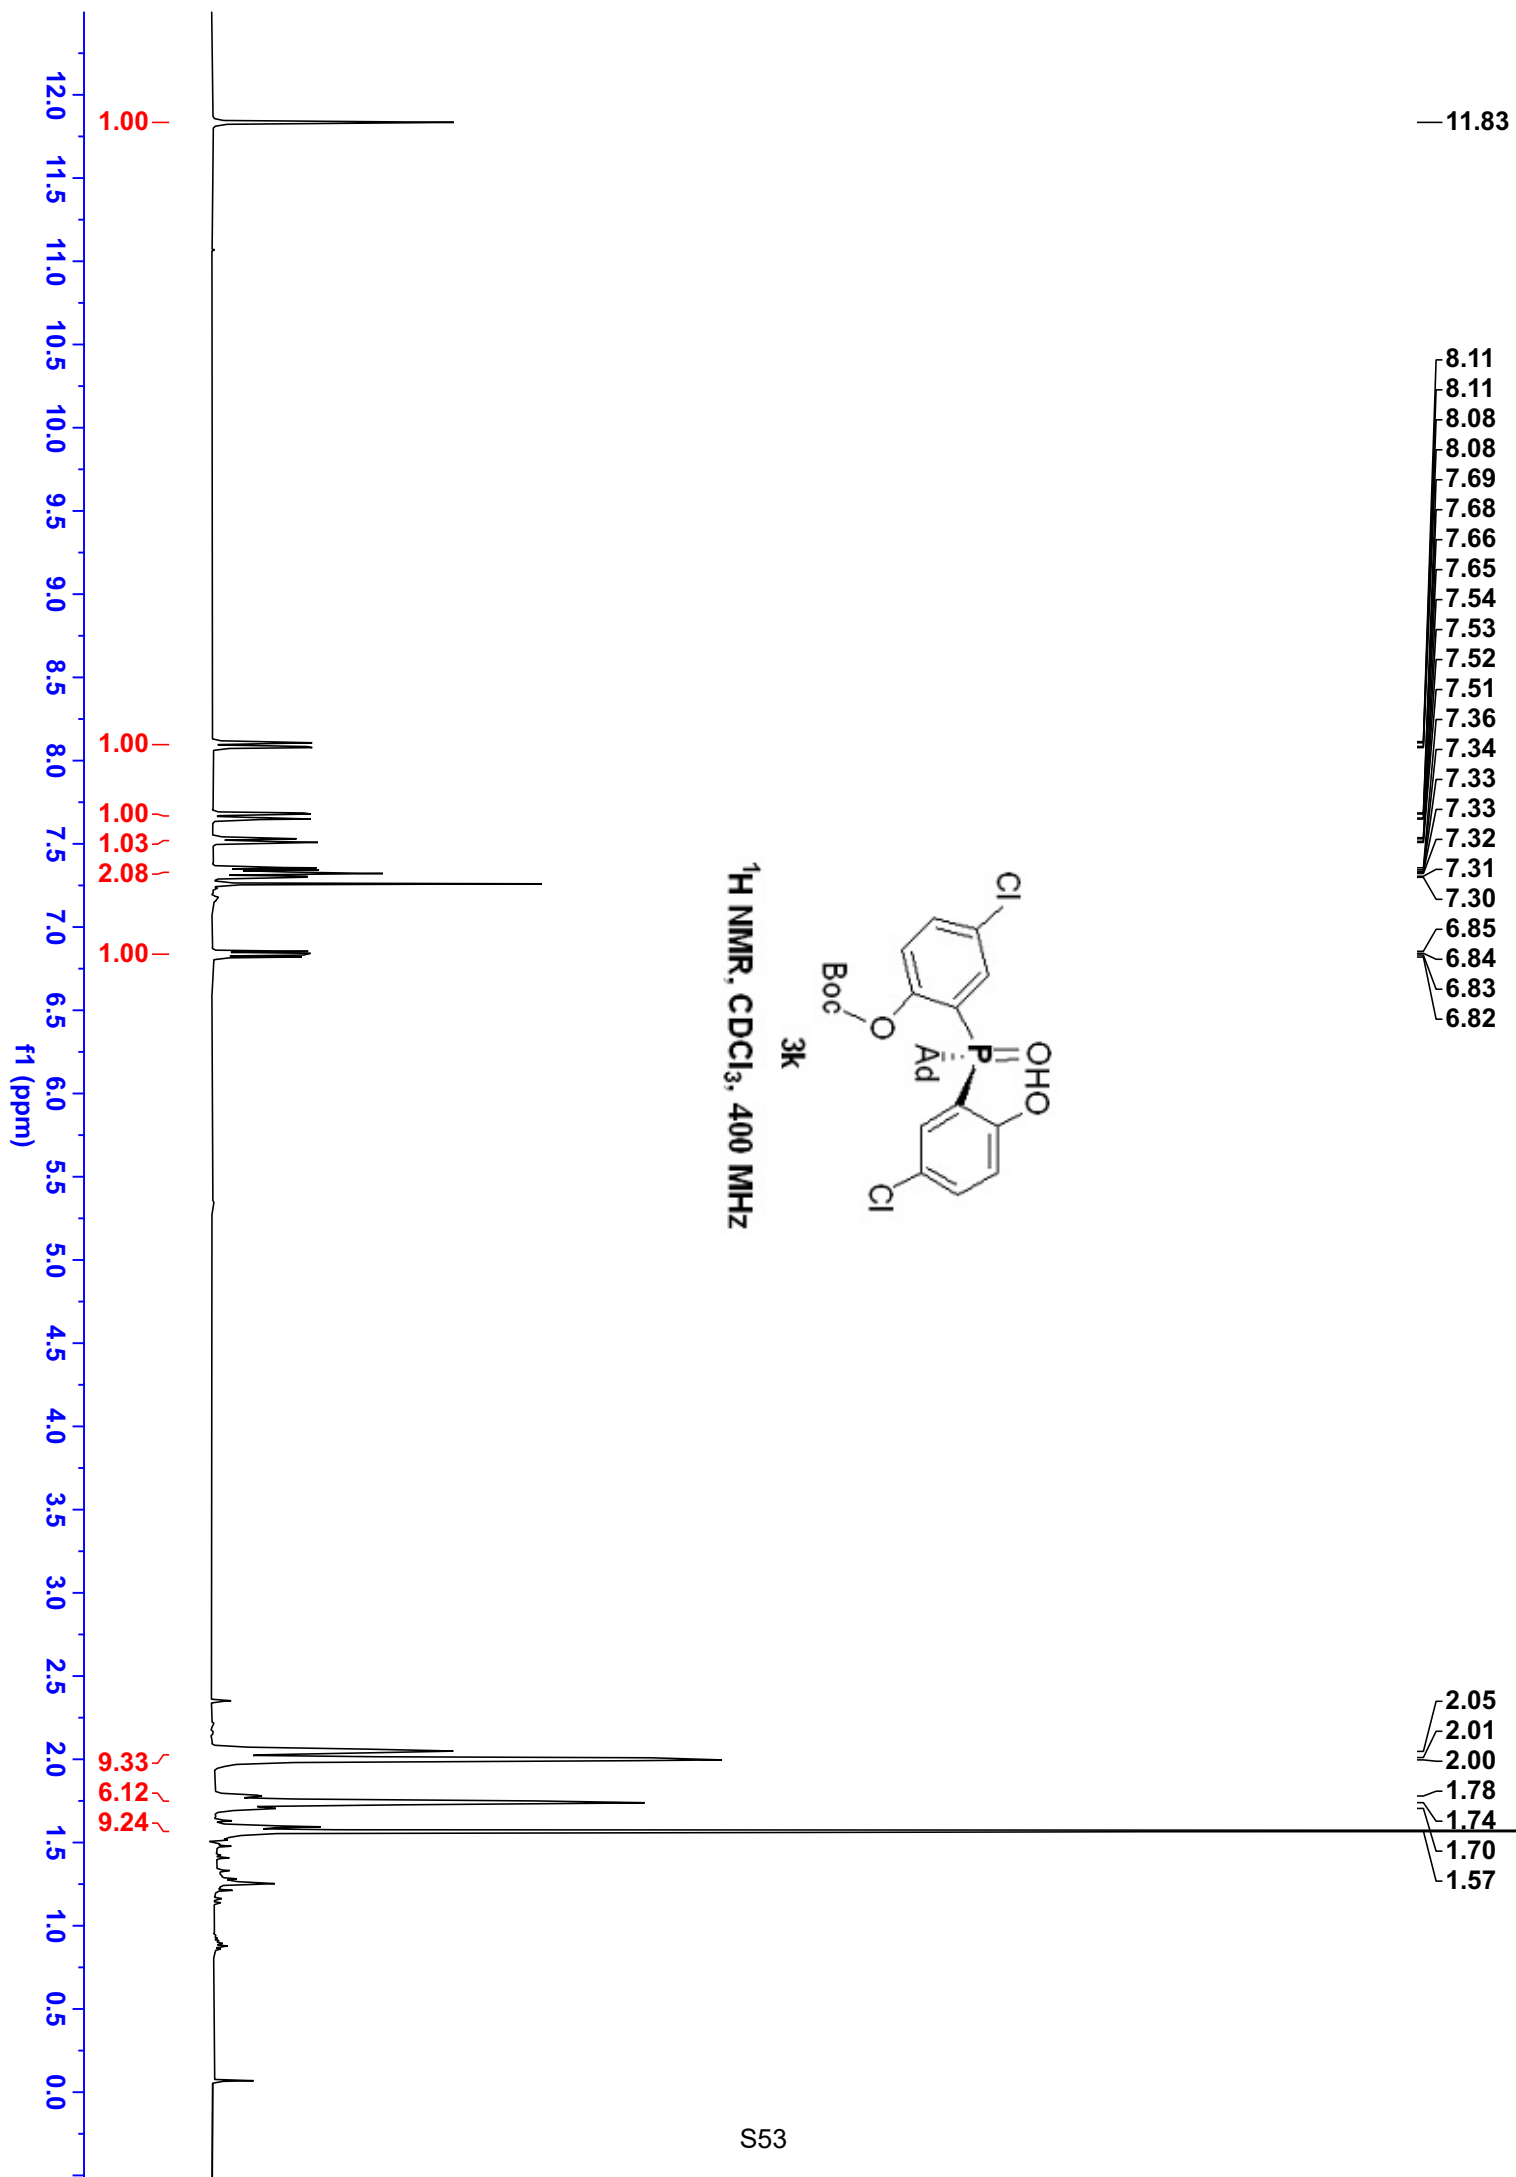

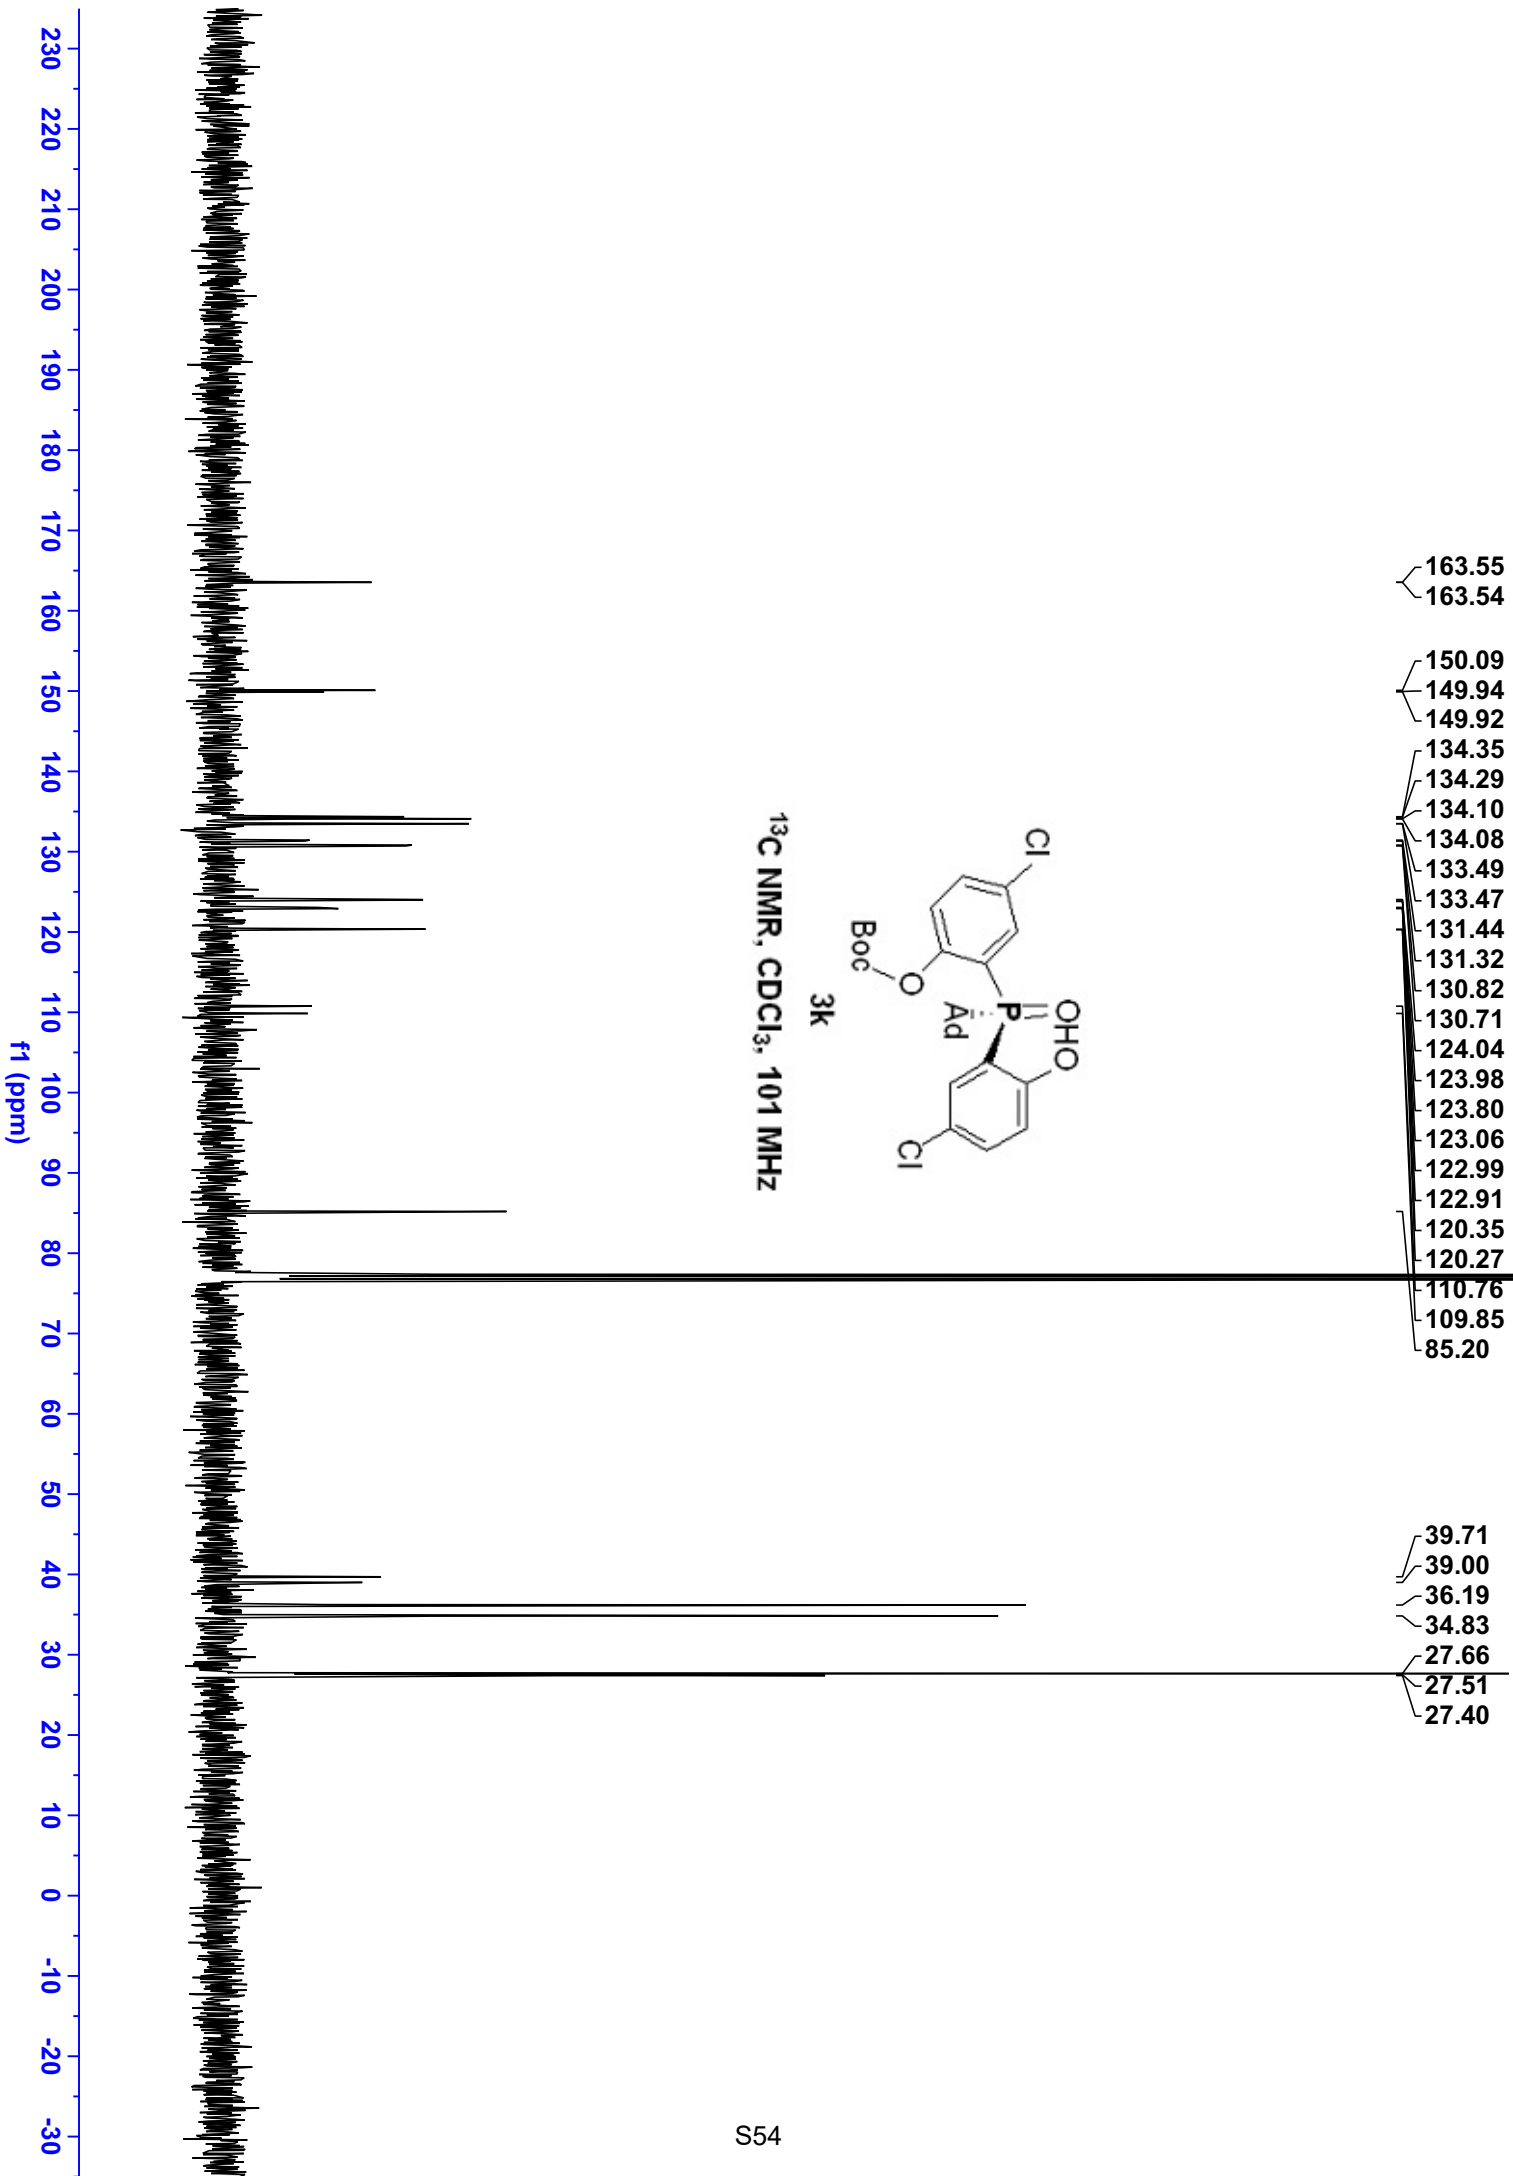

— 46.05

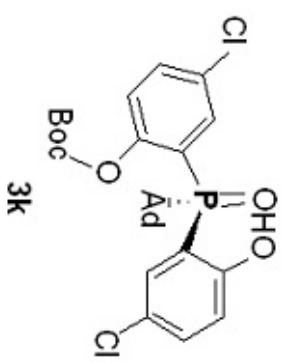

$^{31}\text{P}$  NMR,  $\text{CDCl}_3$ , 162 MHz



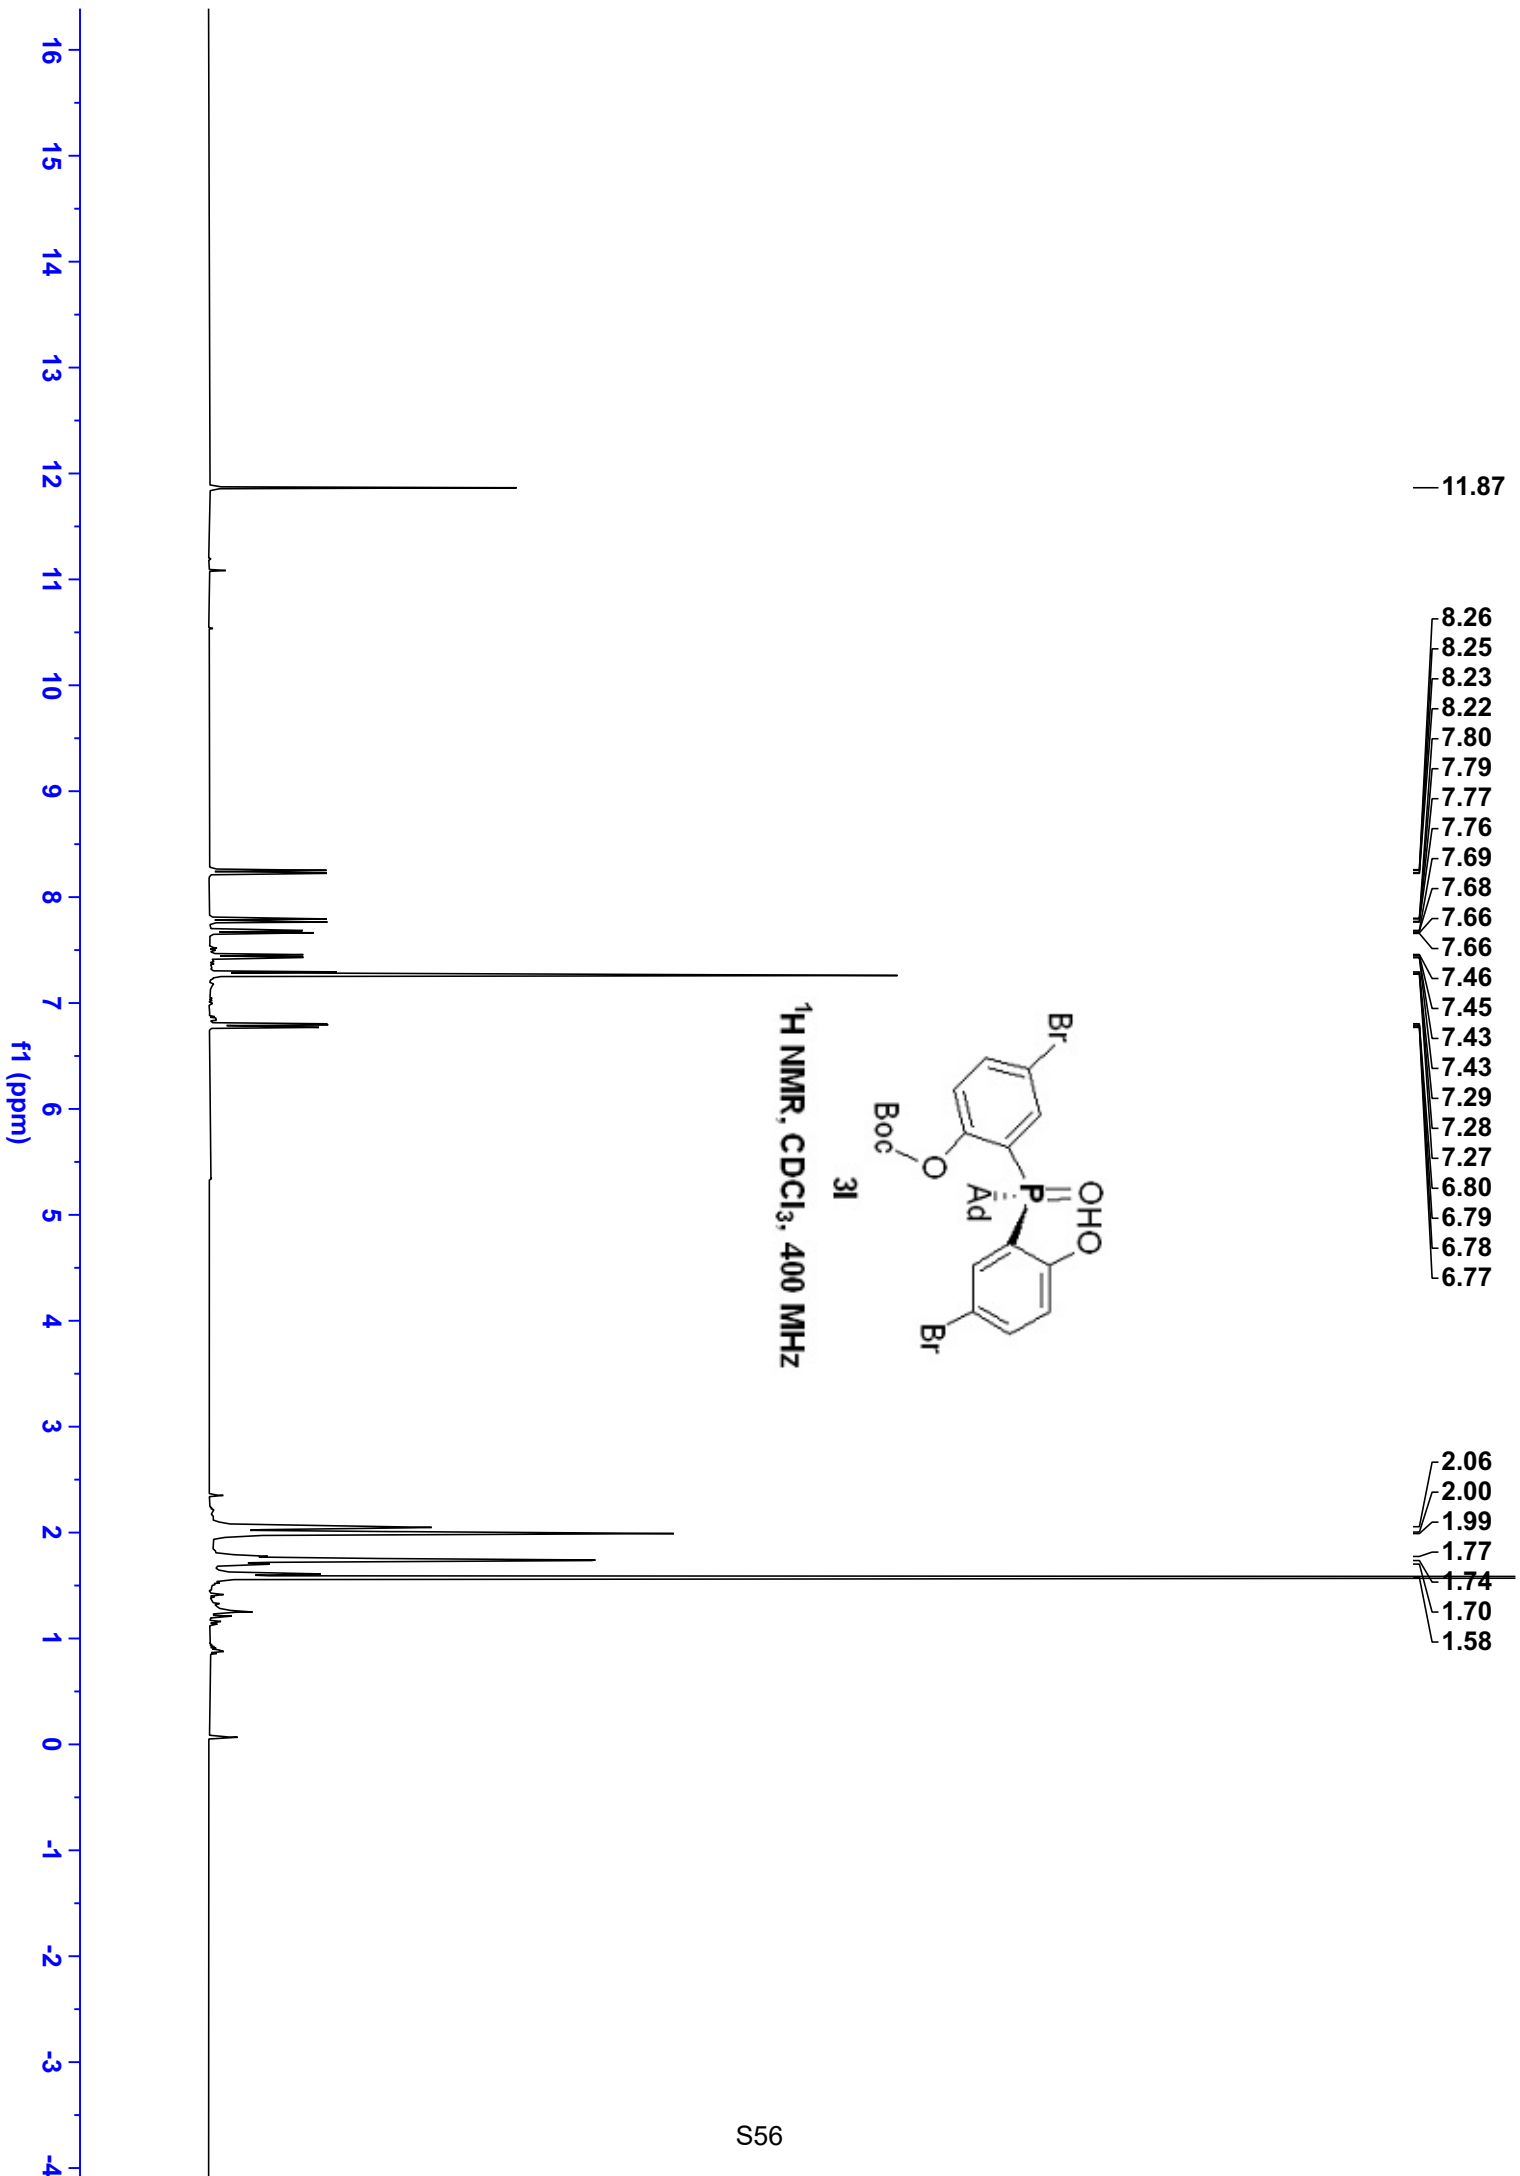

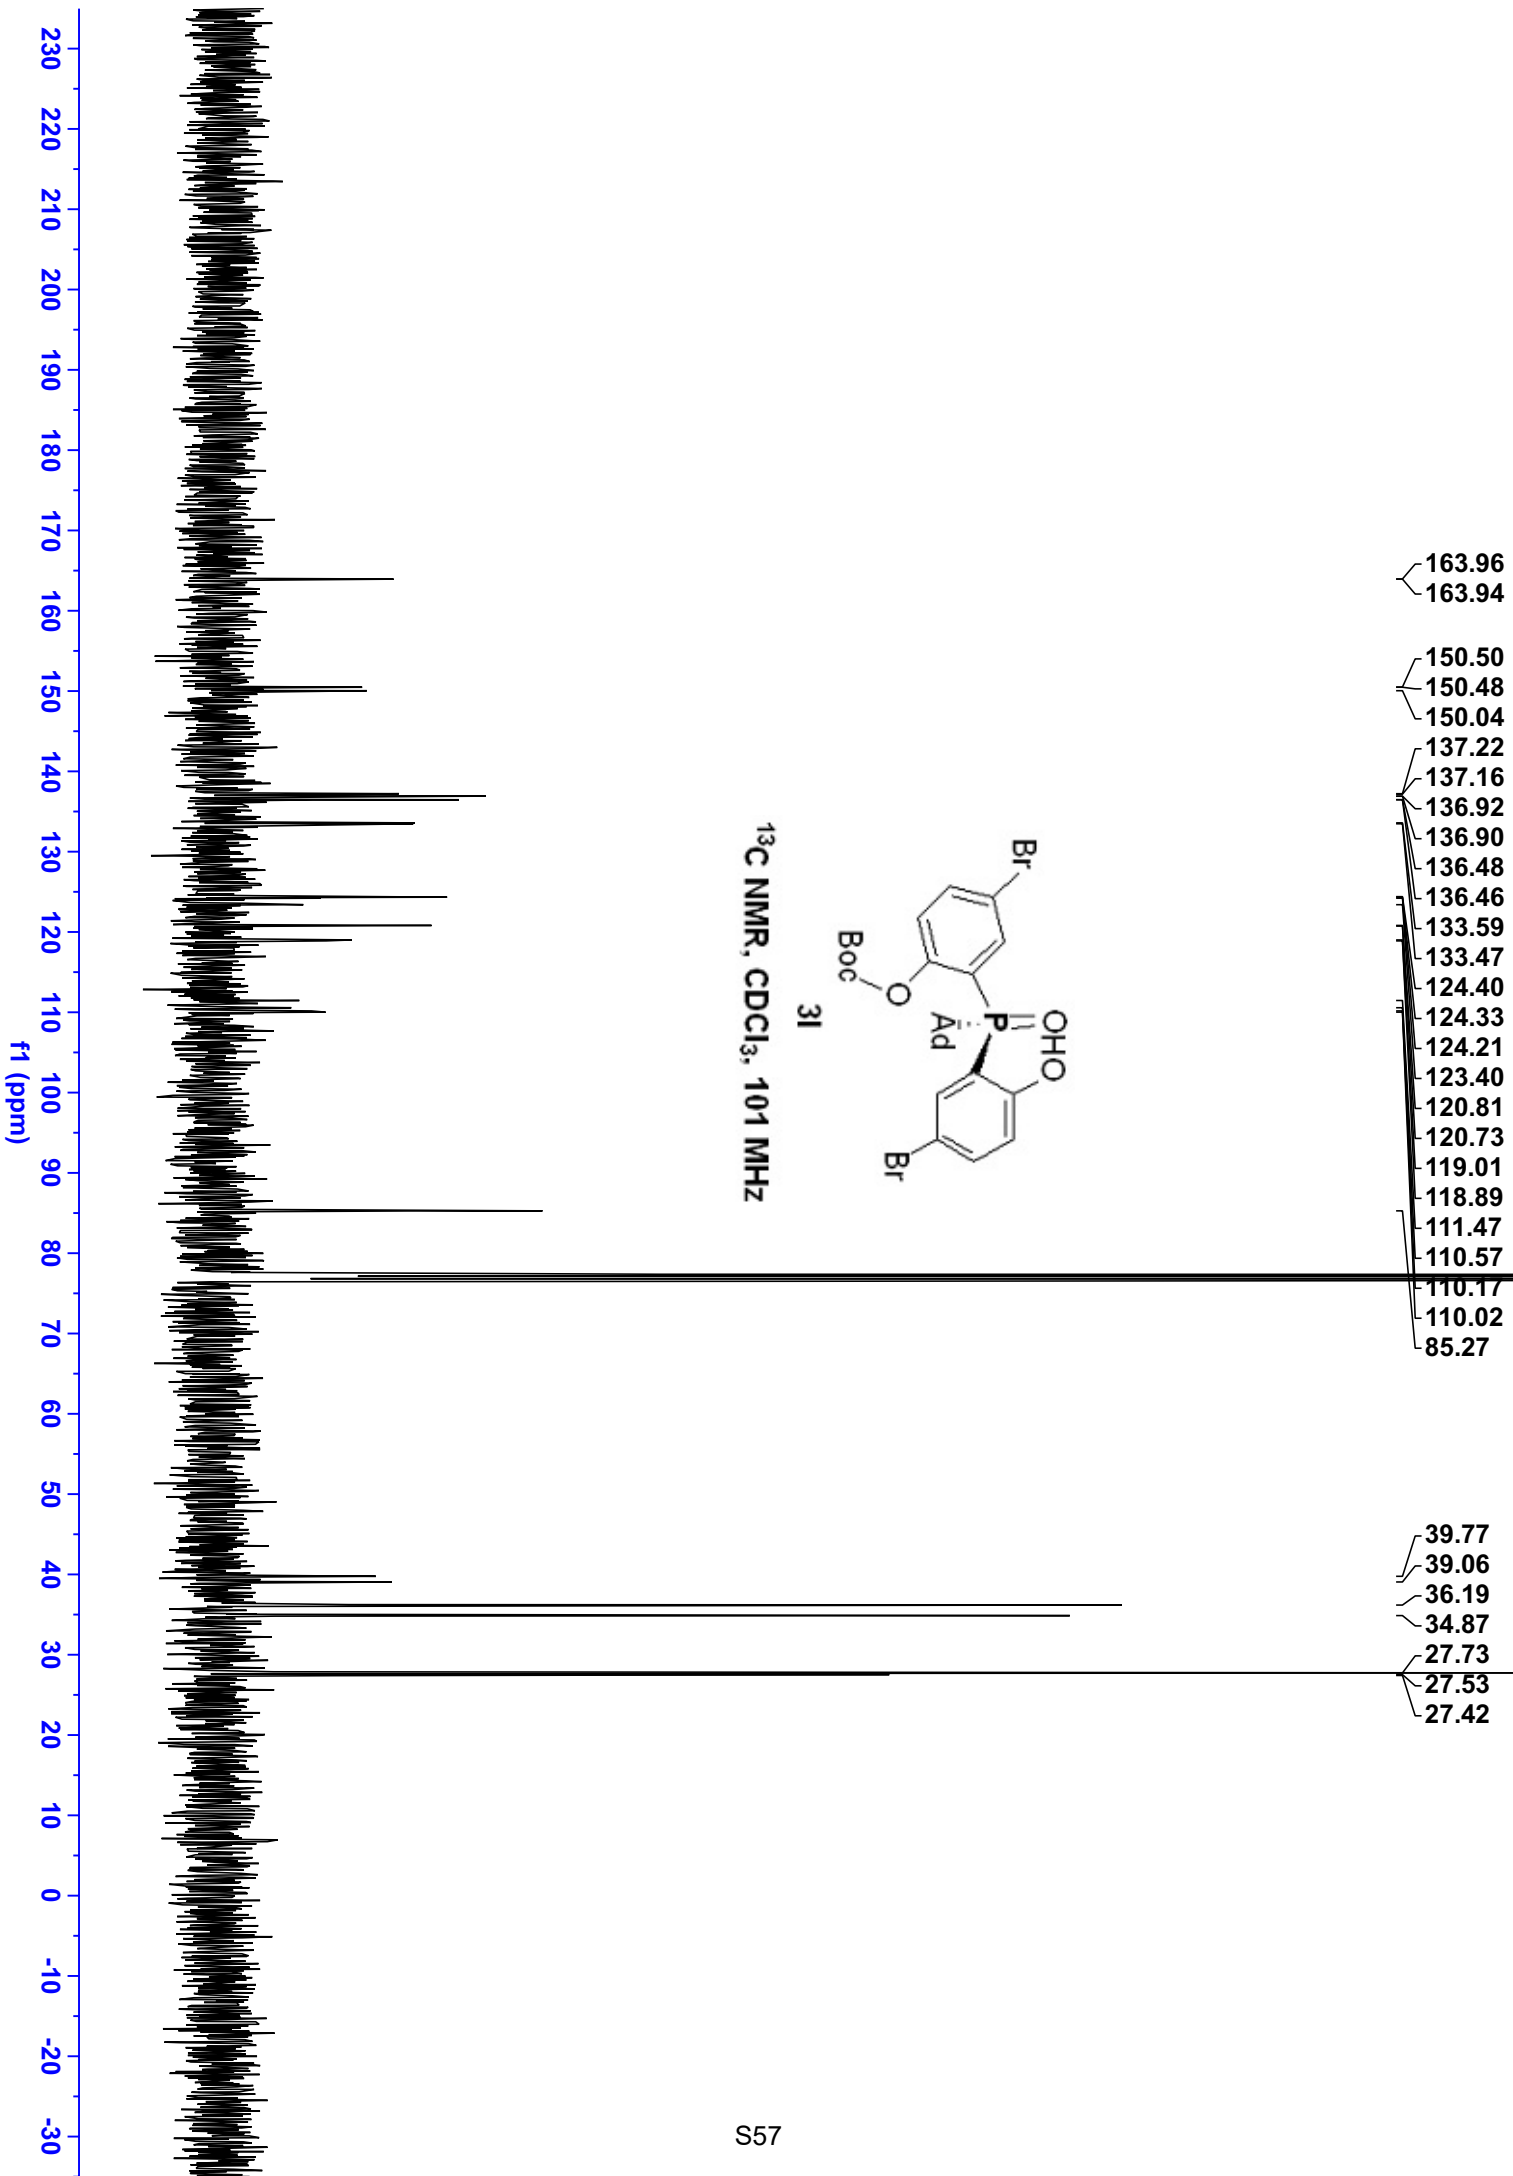

— 45.95

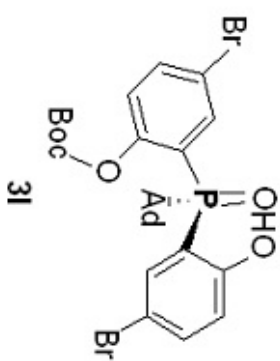

<sup>31</sup>P NMR, CDCl<sub>3</sub>, 162 MHz



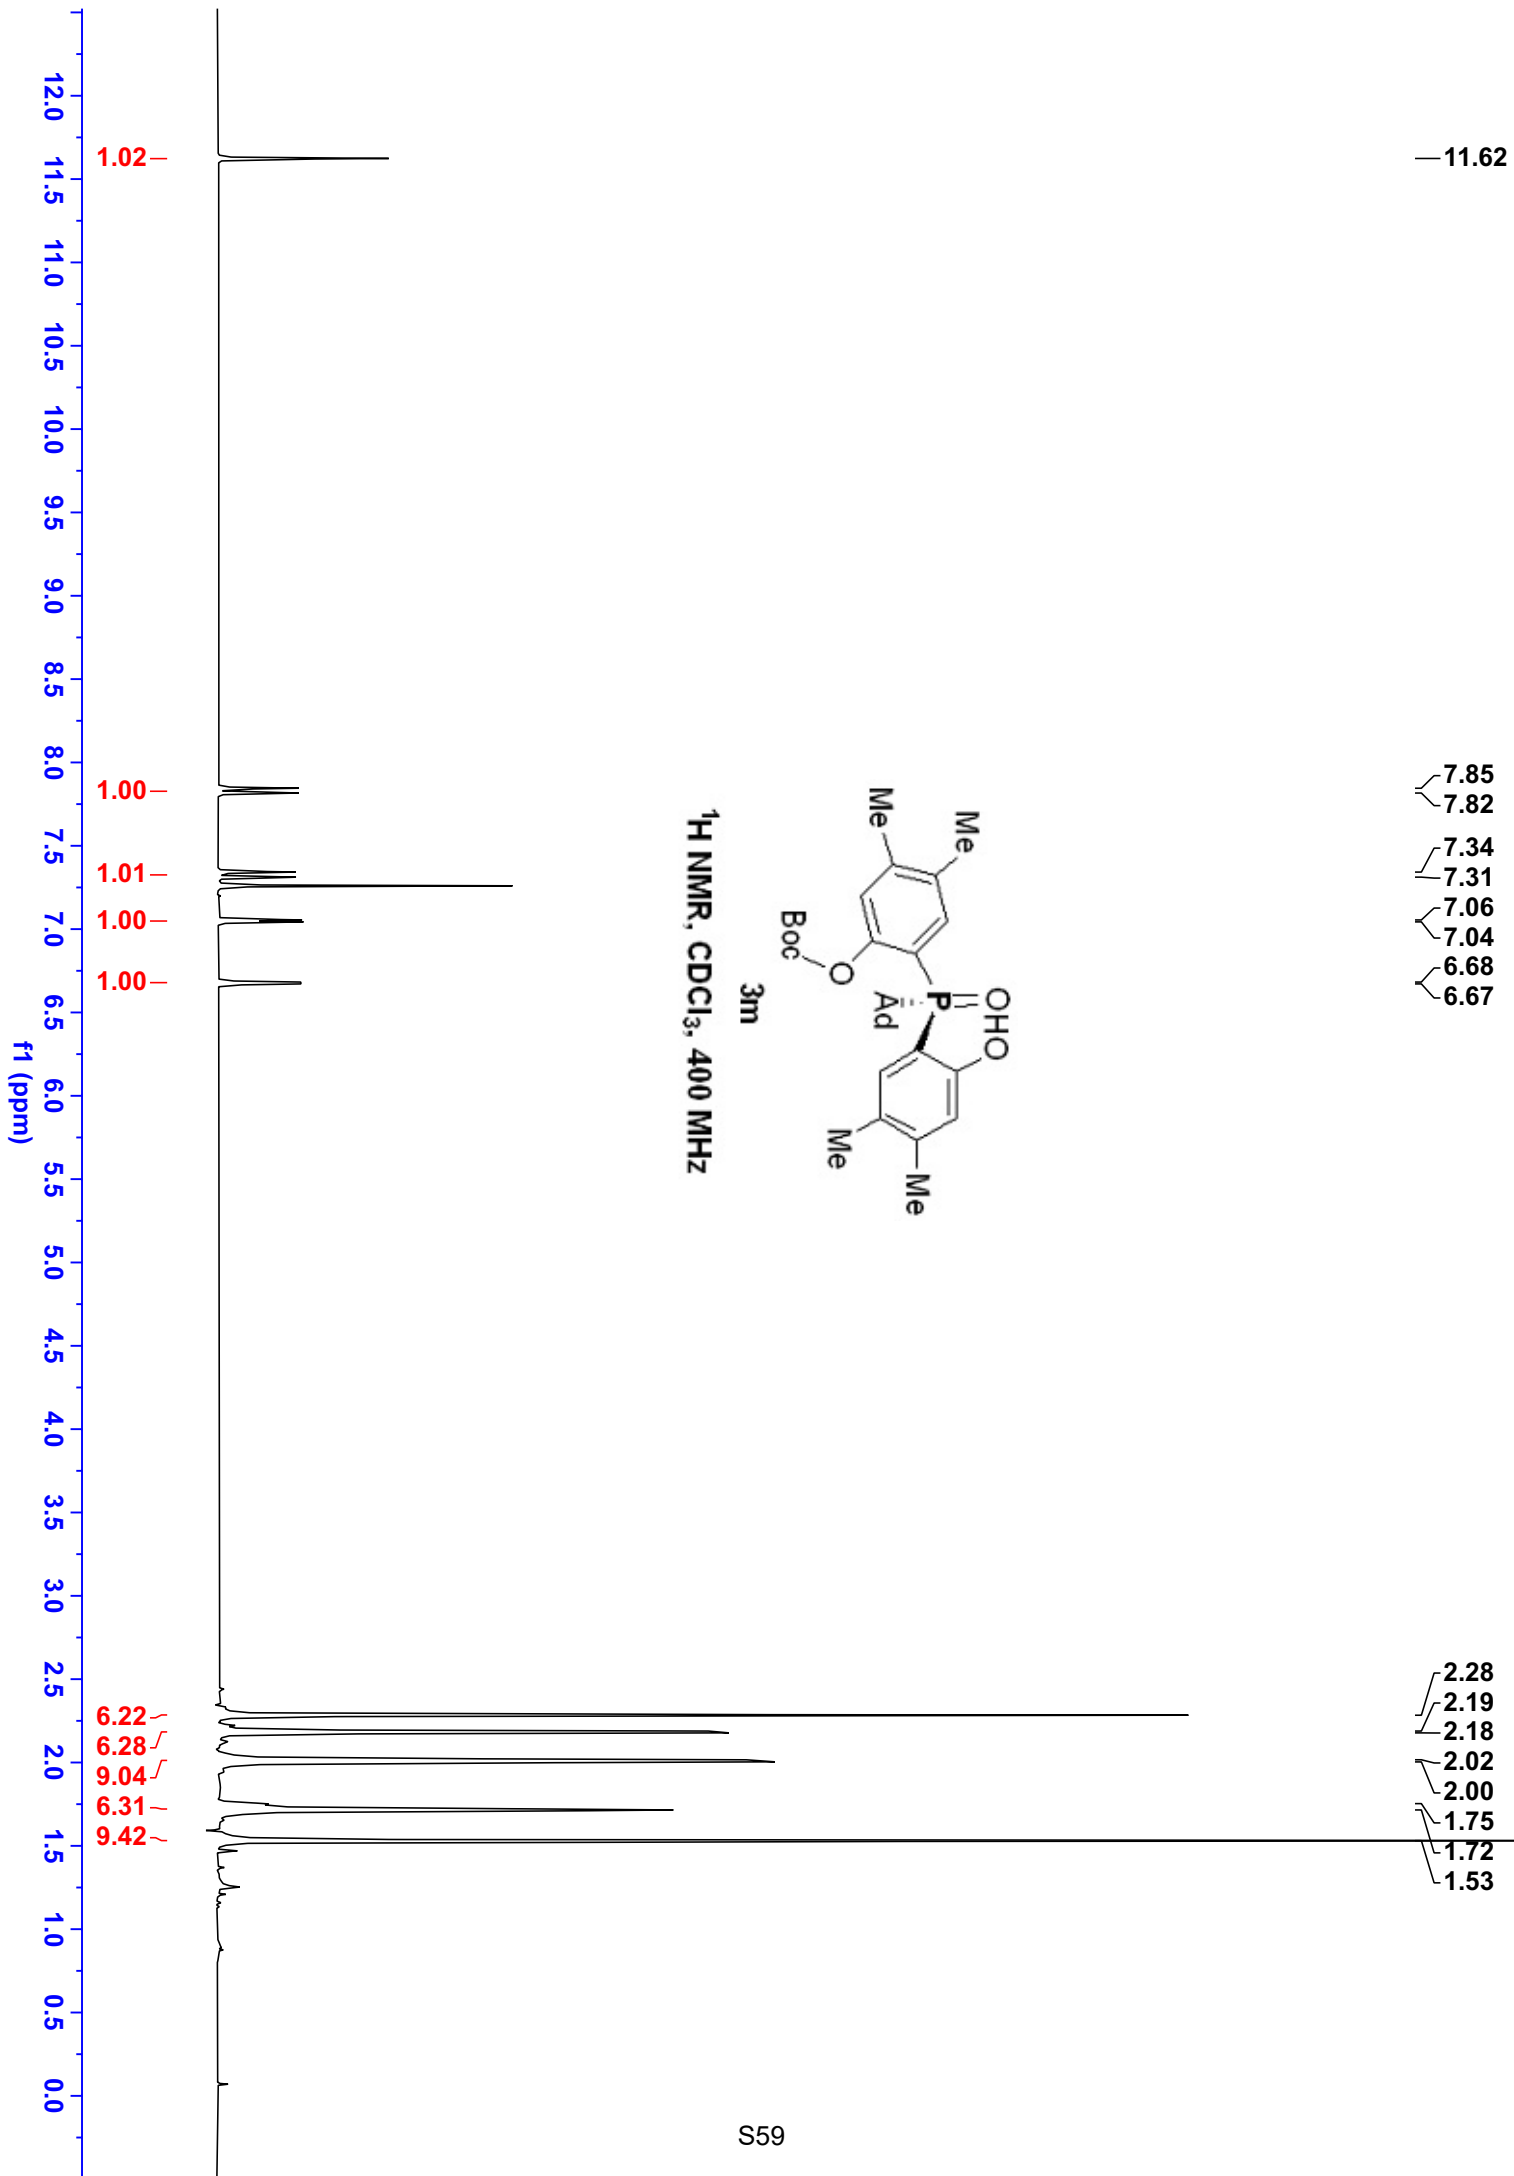

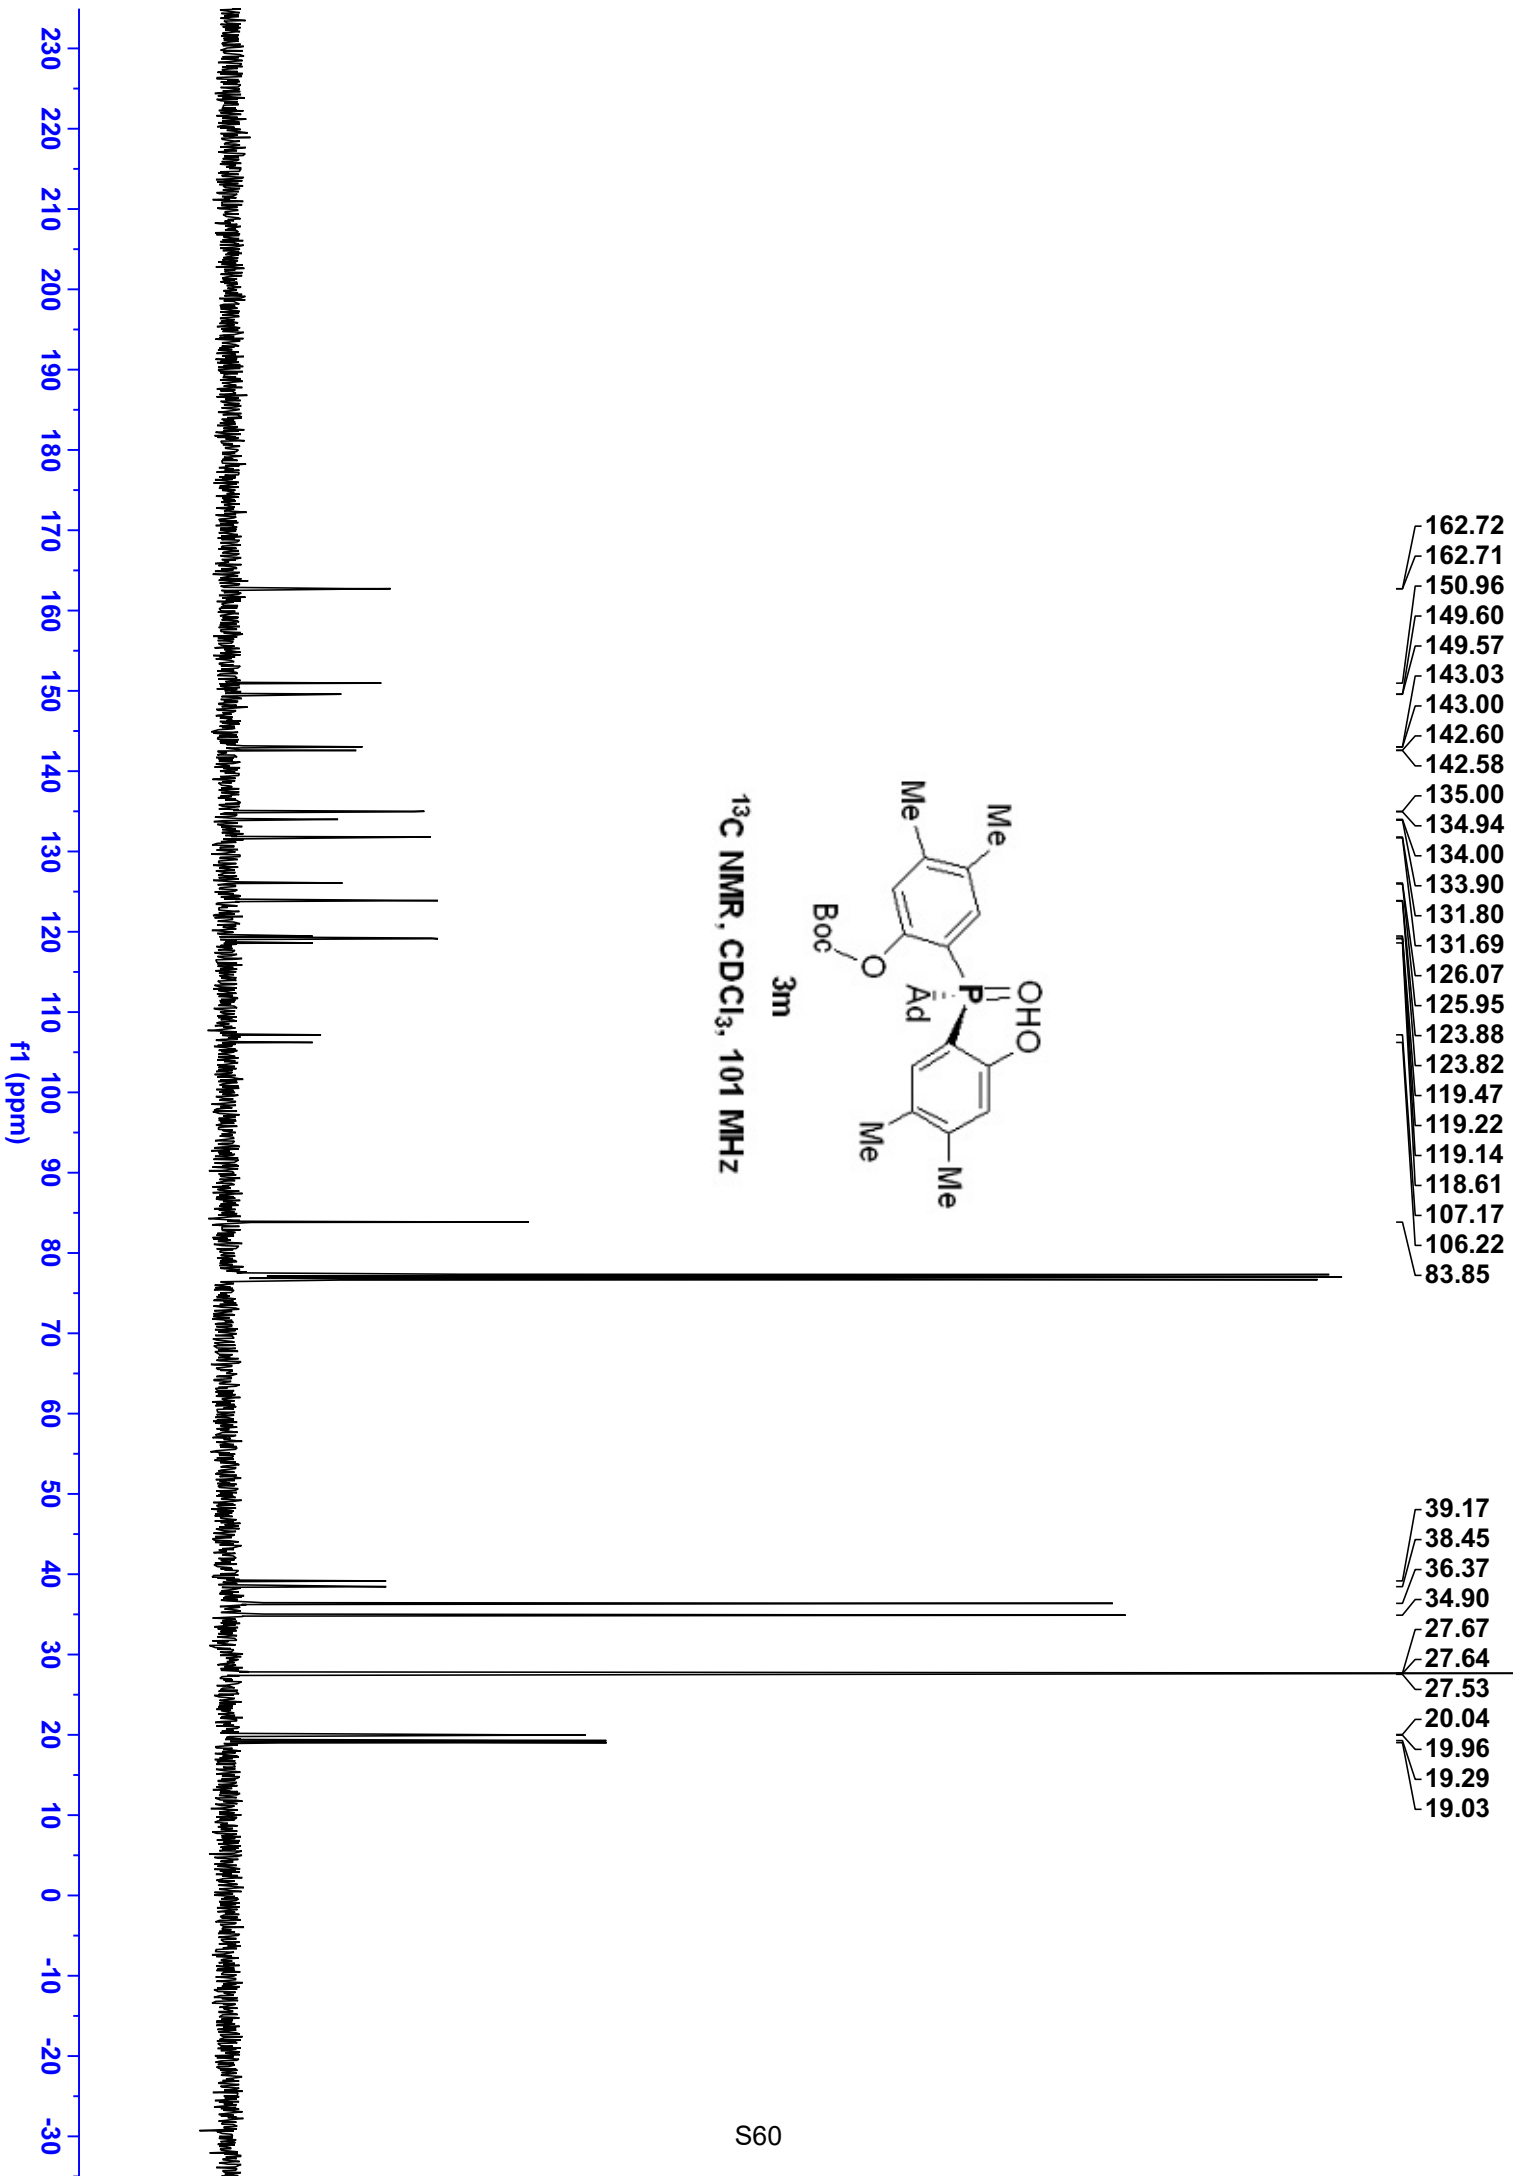

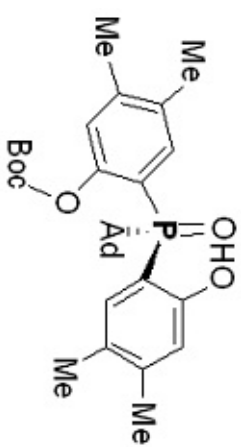

3m

 $^{31}\text{P}$  NMR,  $\text{CDCl}_3$ , 162 MHz

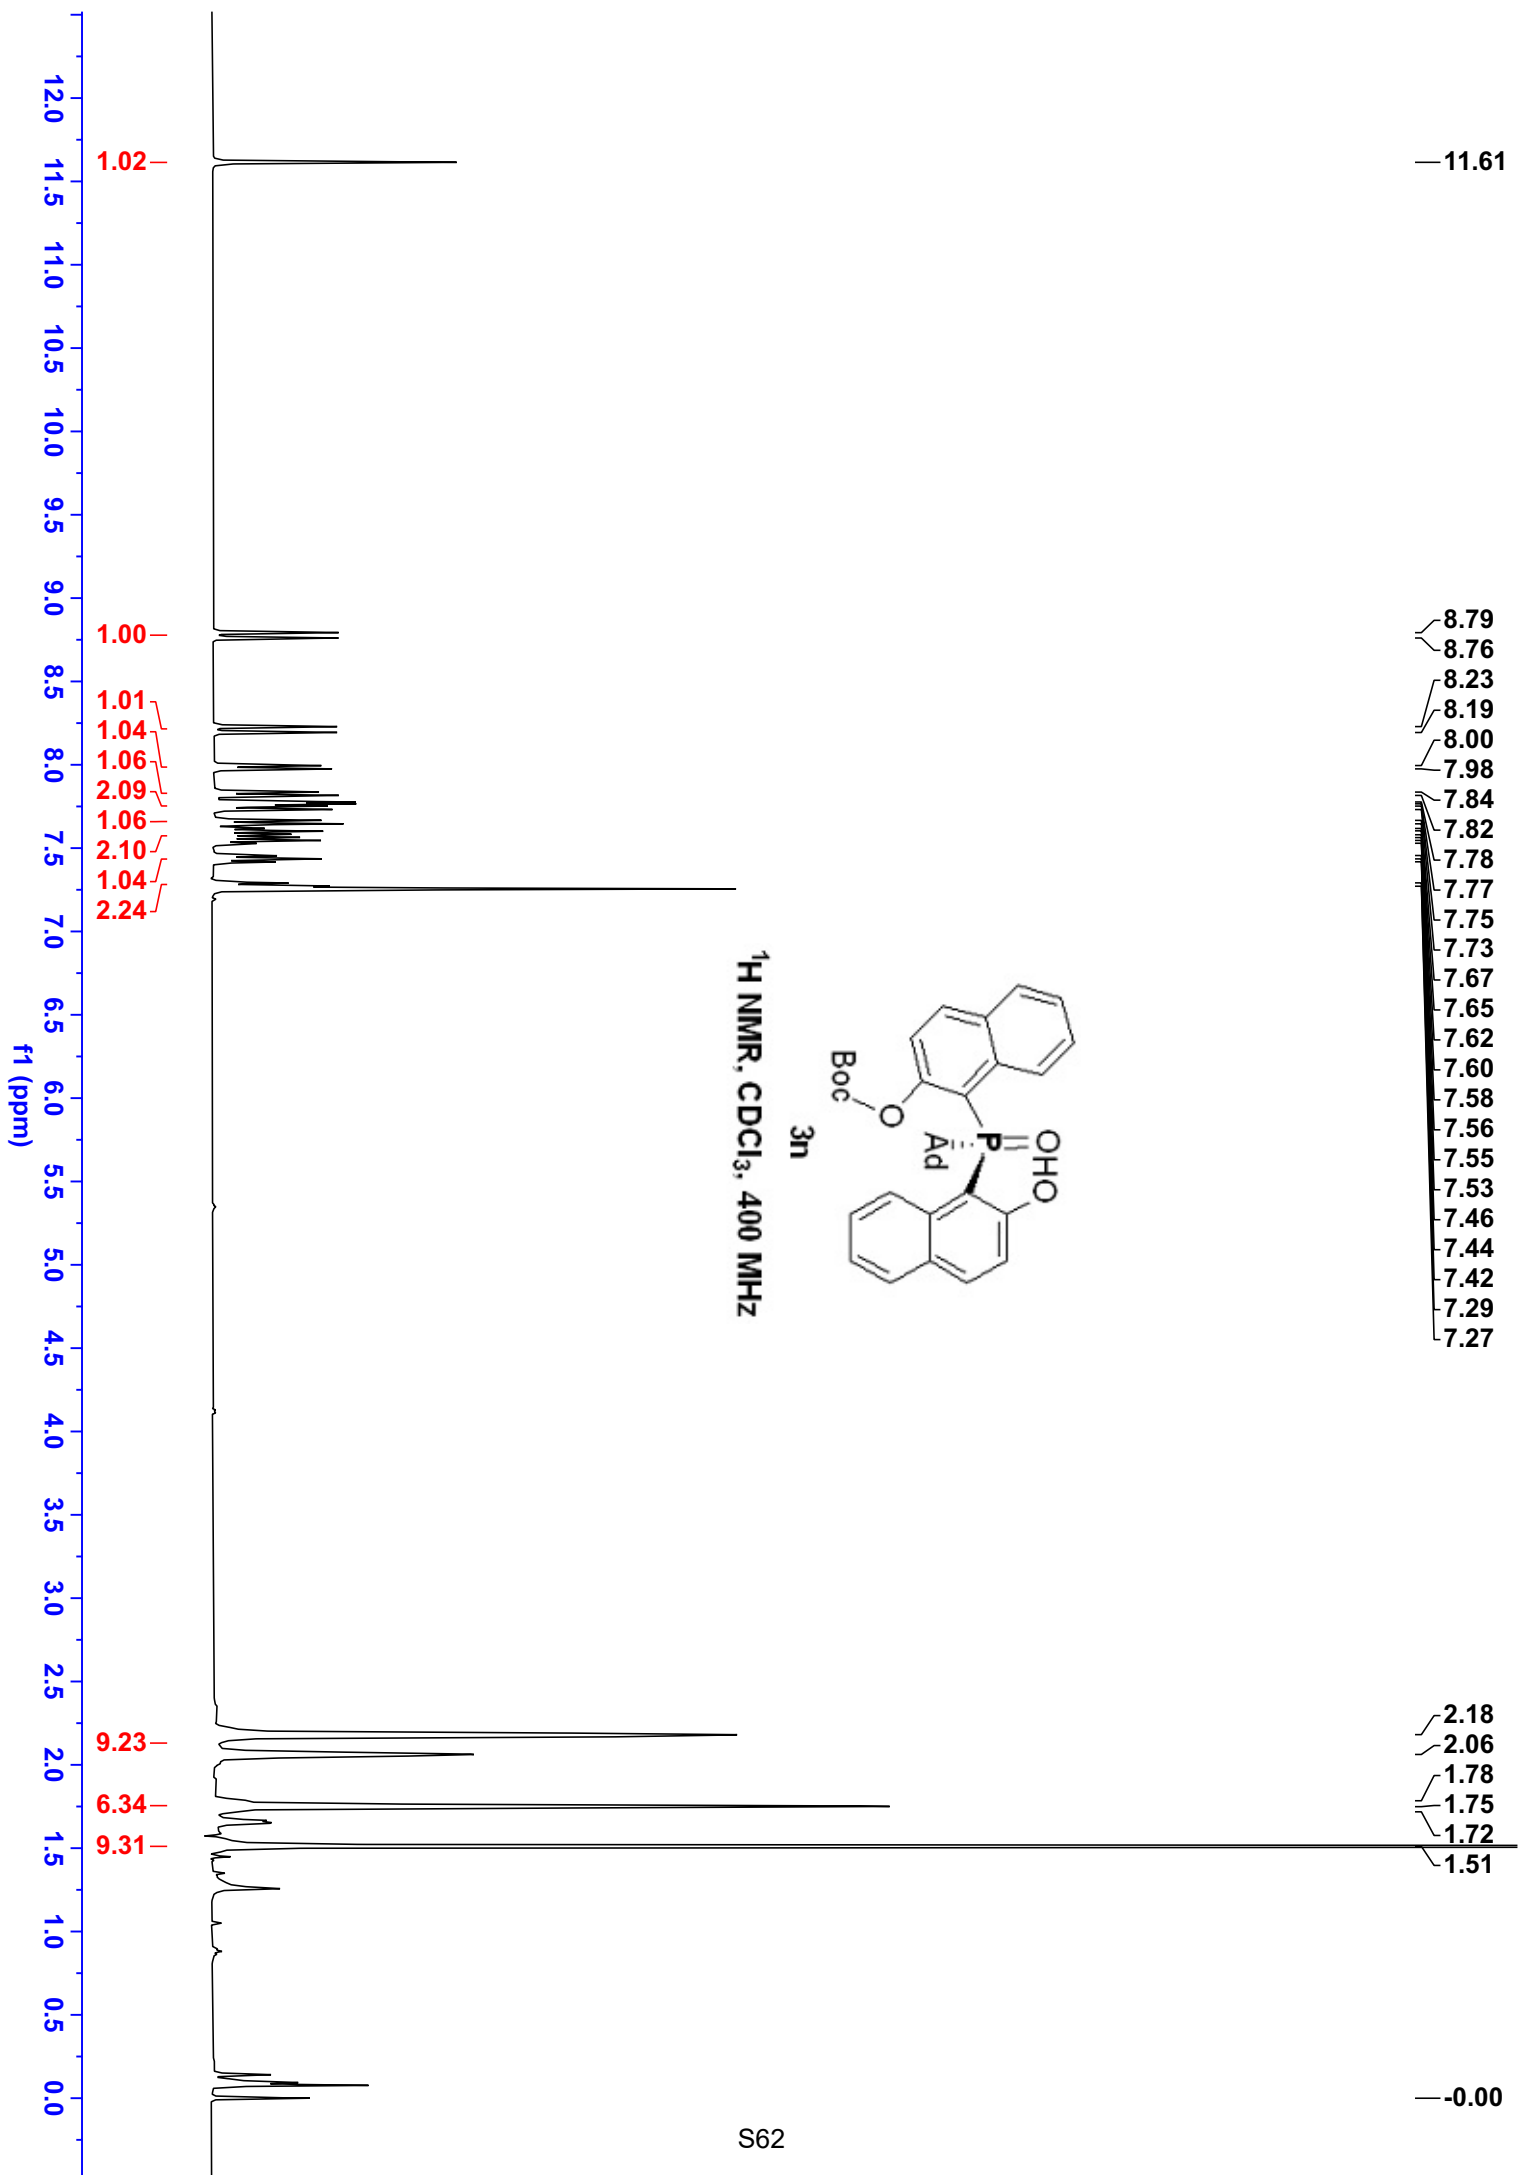

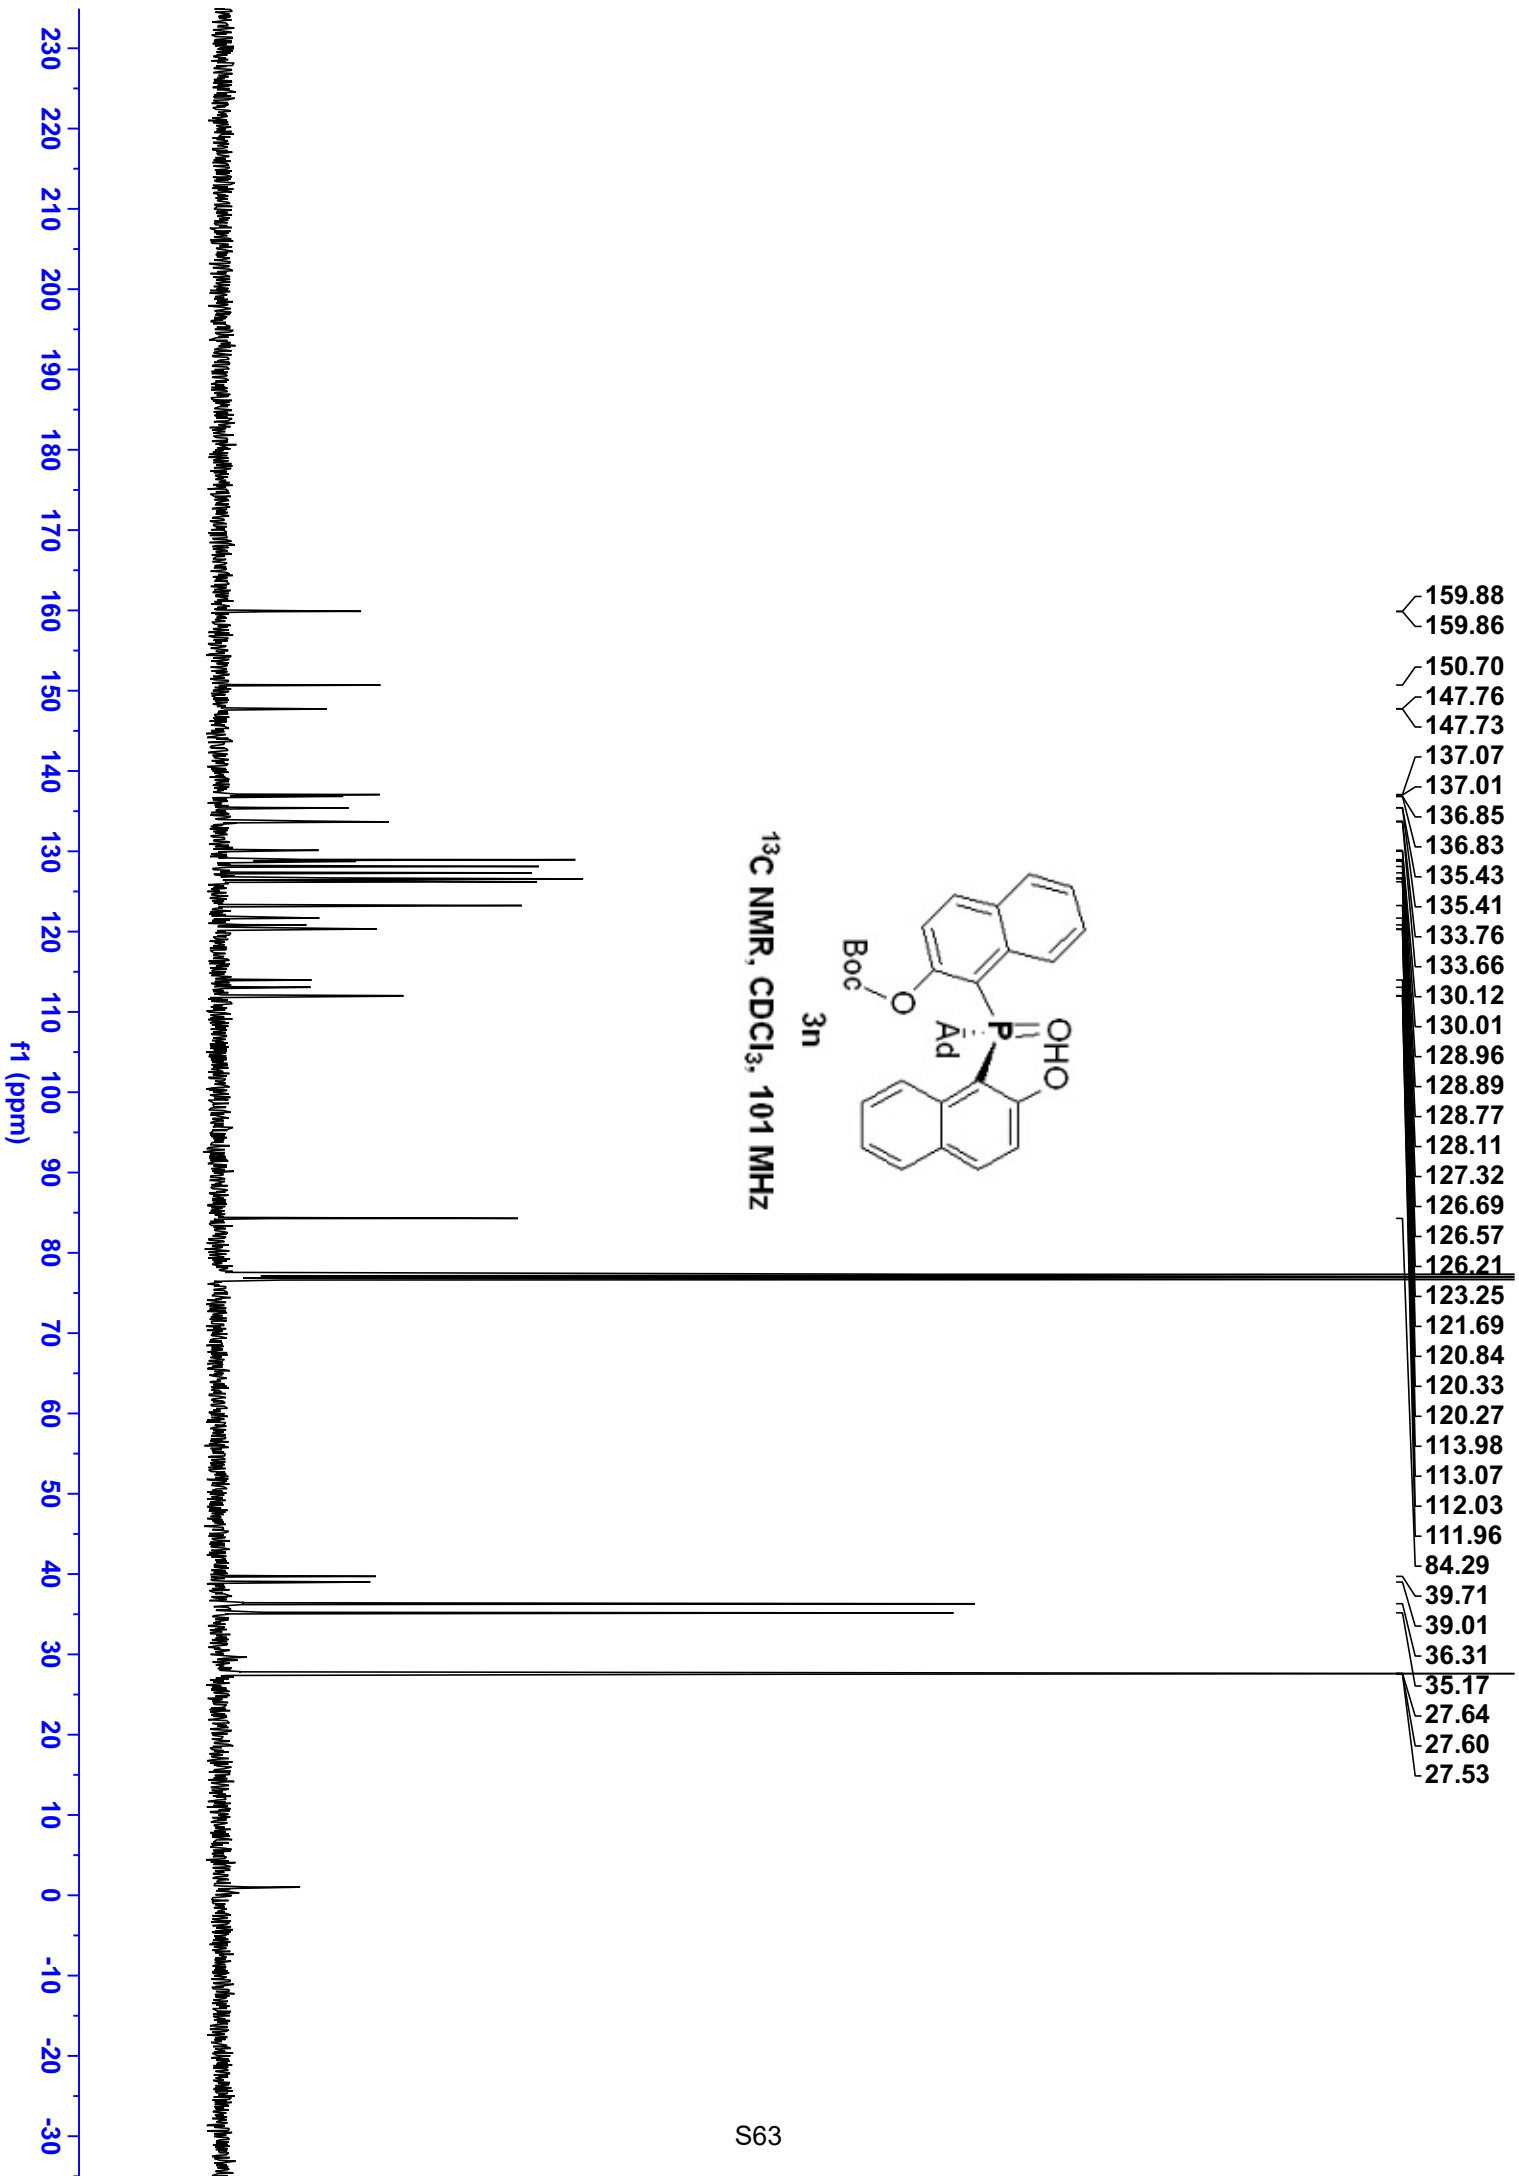

— 47.02

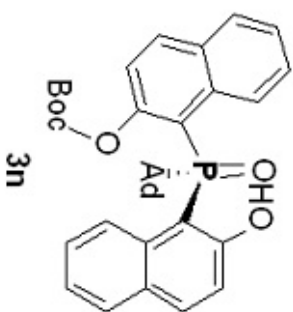

$^{31}\text{P}$  NMR,  $\text{CDCl}_3$ , 162 MHz



- 8.44
- 8.43
- 8.41
- 8.40
- 7.87
- 7.87
- 7.84
- 7.84
- 7.83
- 7.82
- 7.81
- 7.80
- 7.78
- 7.76
- 7.65
- 7.63
- 7.61
- 7.59
- 7.50
- 7.48
- 7.46
- 7.44
- 7.43
- 7.42
- 7.40
- 7.38
- 7.36
- 7.34
- 7.19
- 7.15
- 7.10
- 7.07
- 7.06
- 7.04
- 7.03
- 2.22
- 2.21
- 1.88
- 1.63

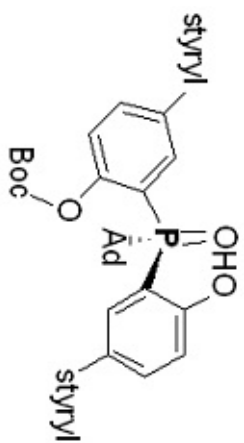

<sup>1</sup>H NMR, CDCl<sub>3</sub>, 400 MHz

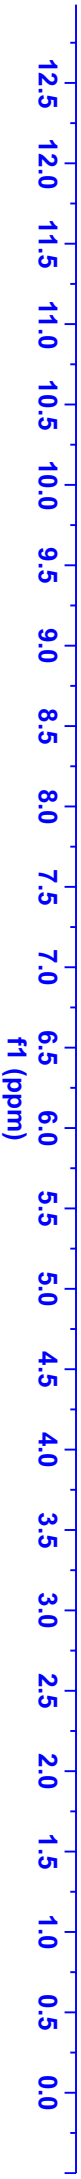

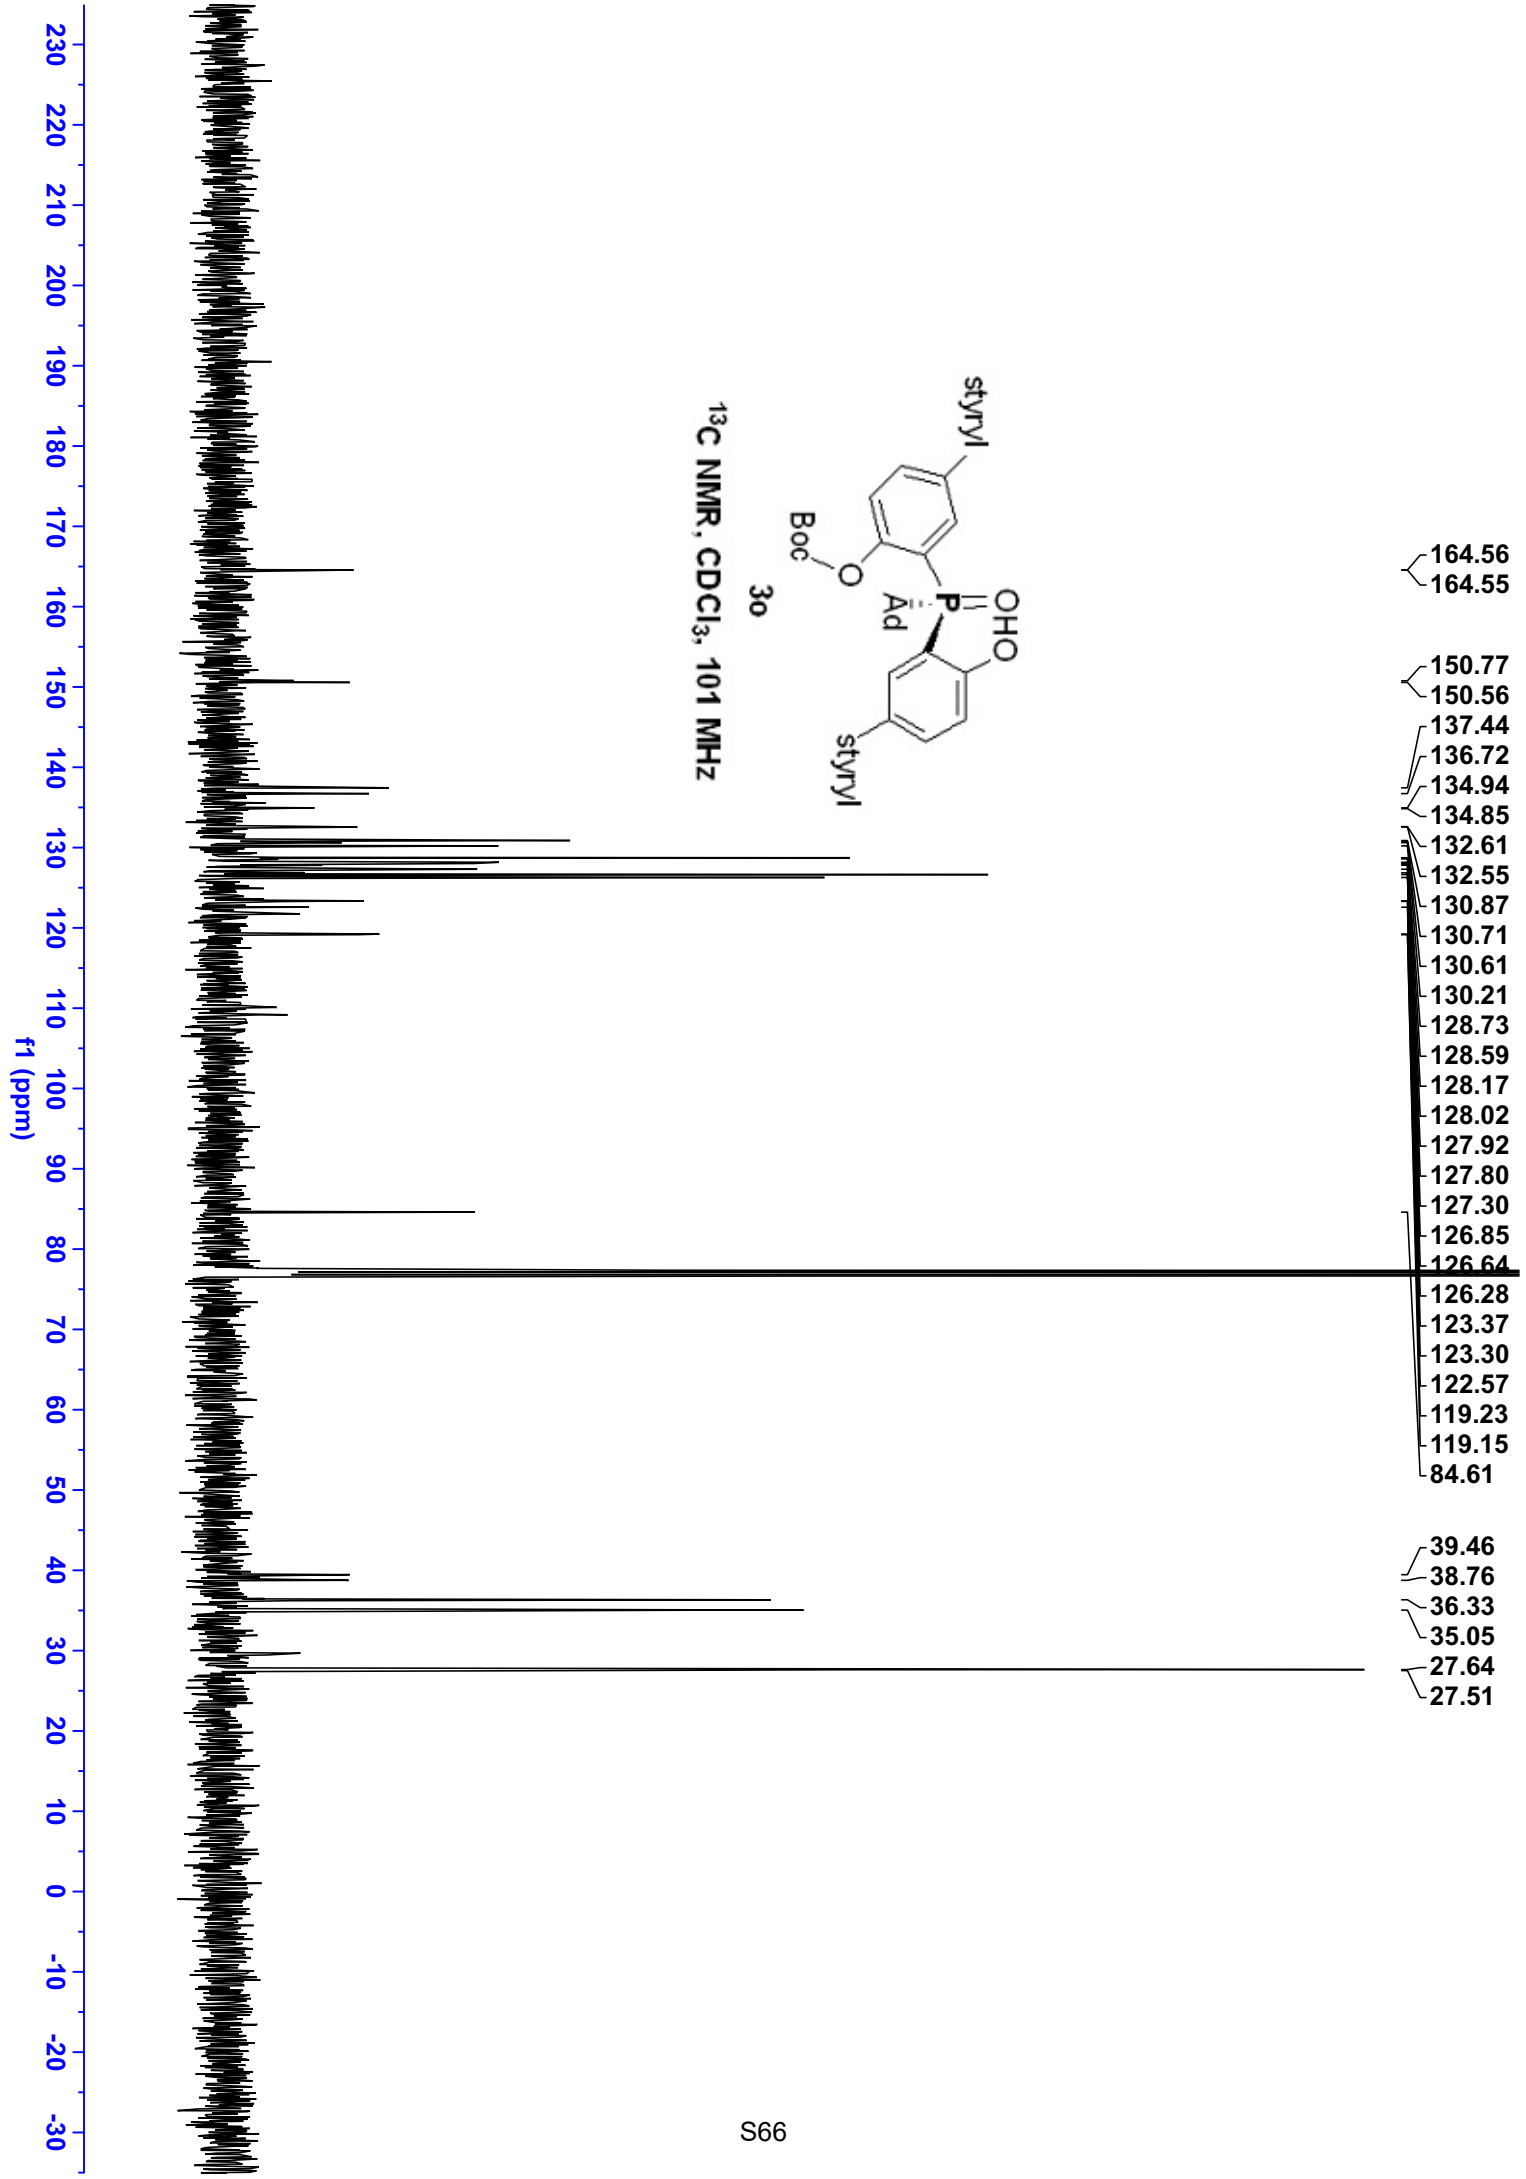

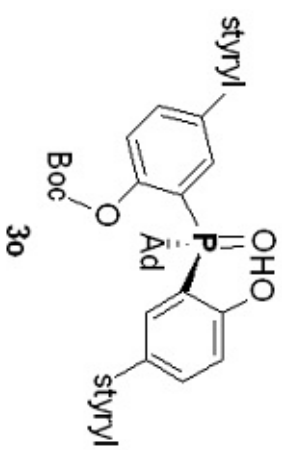

$^{31}\text{P}$  NMR,  $\text{CDCl}_3$ , 162 MHz



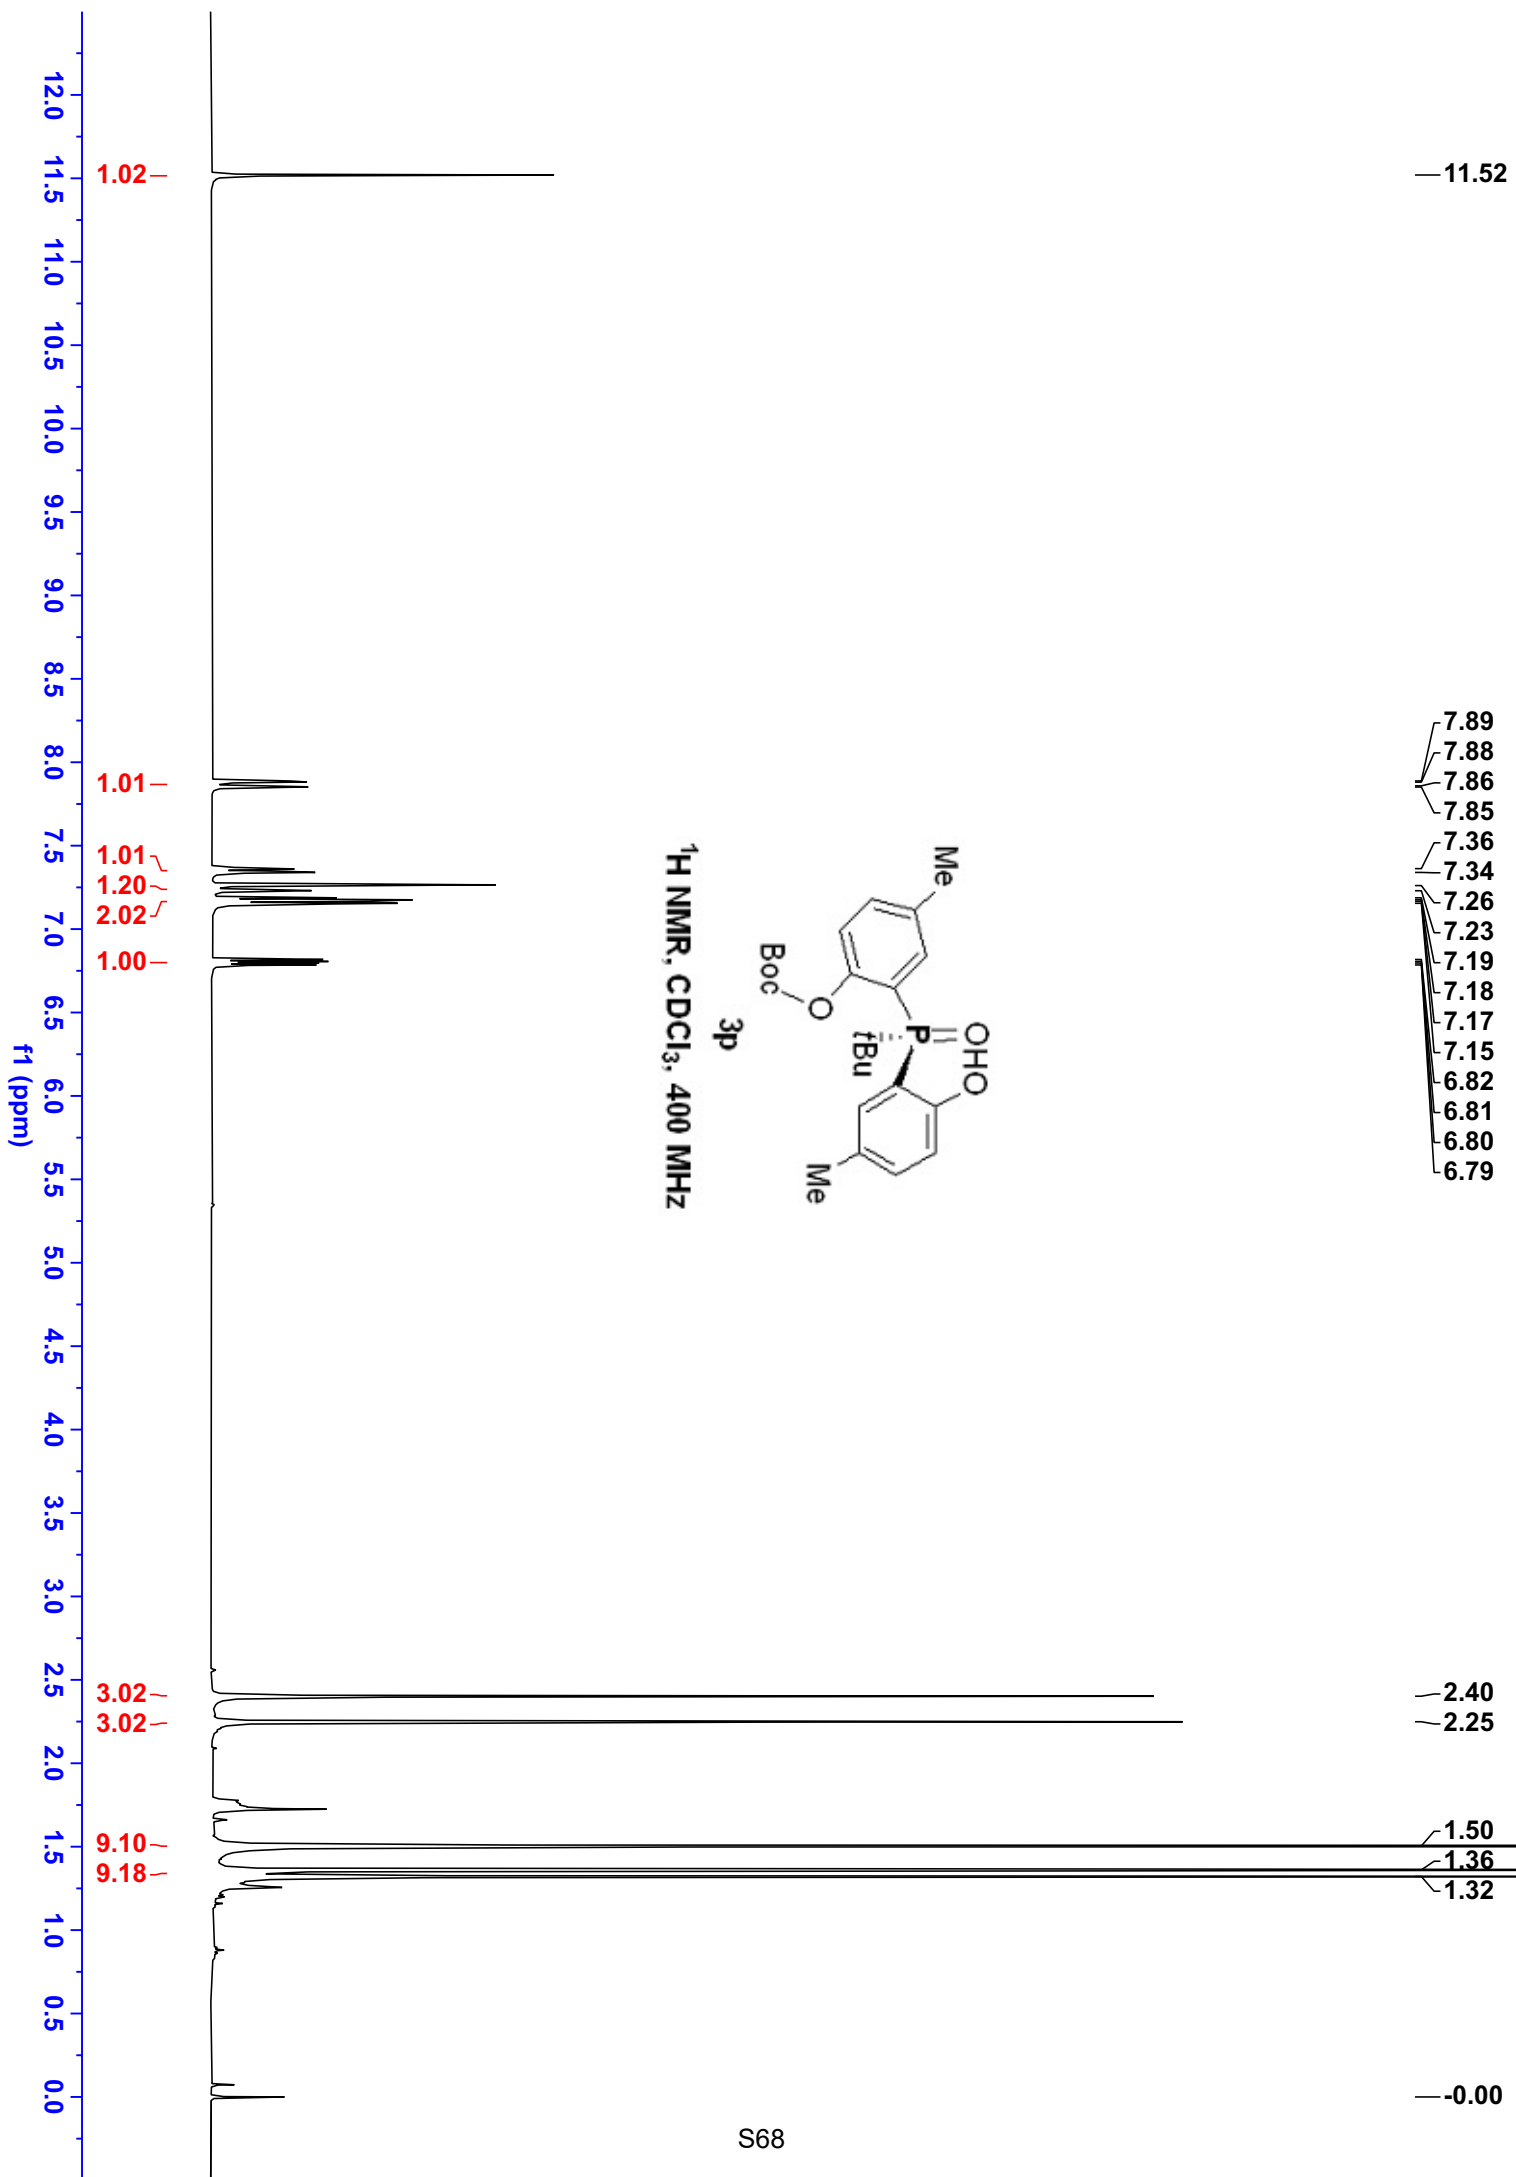

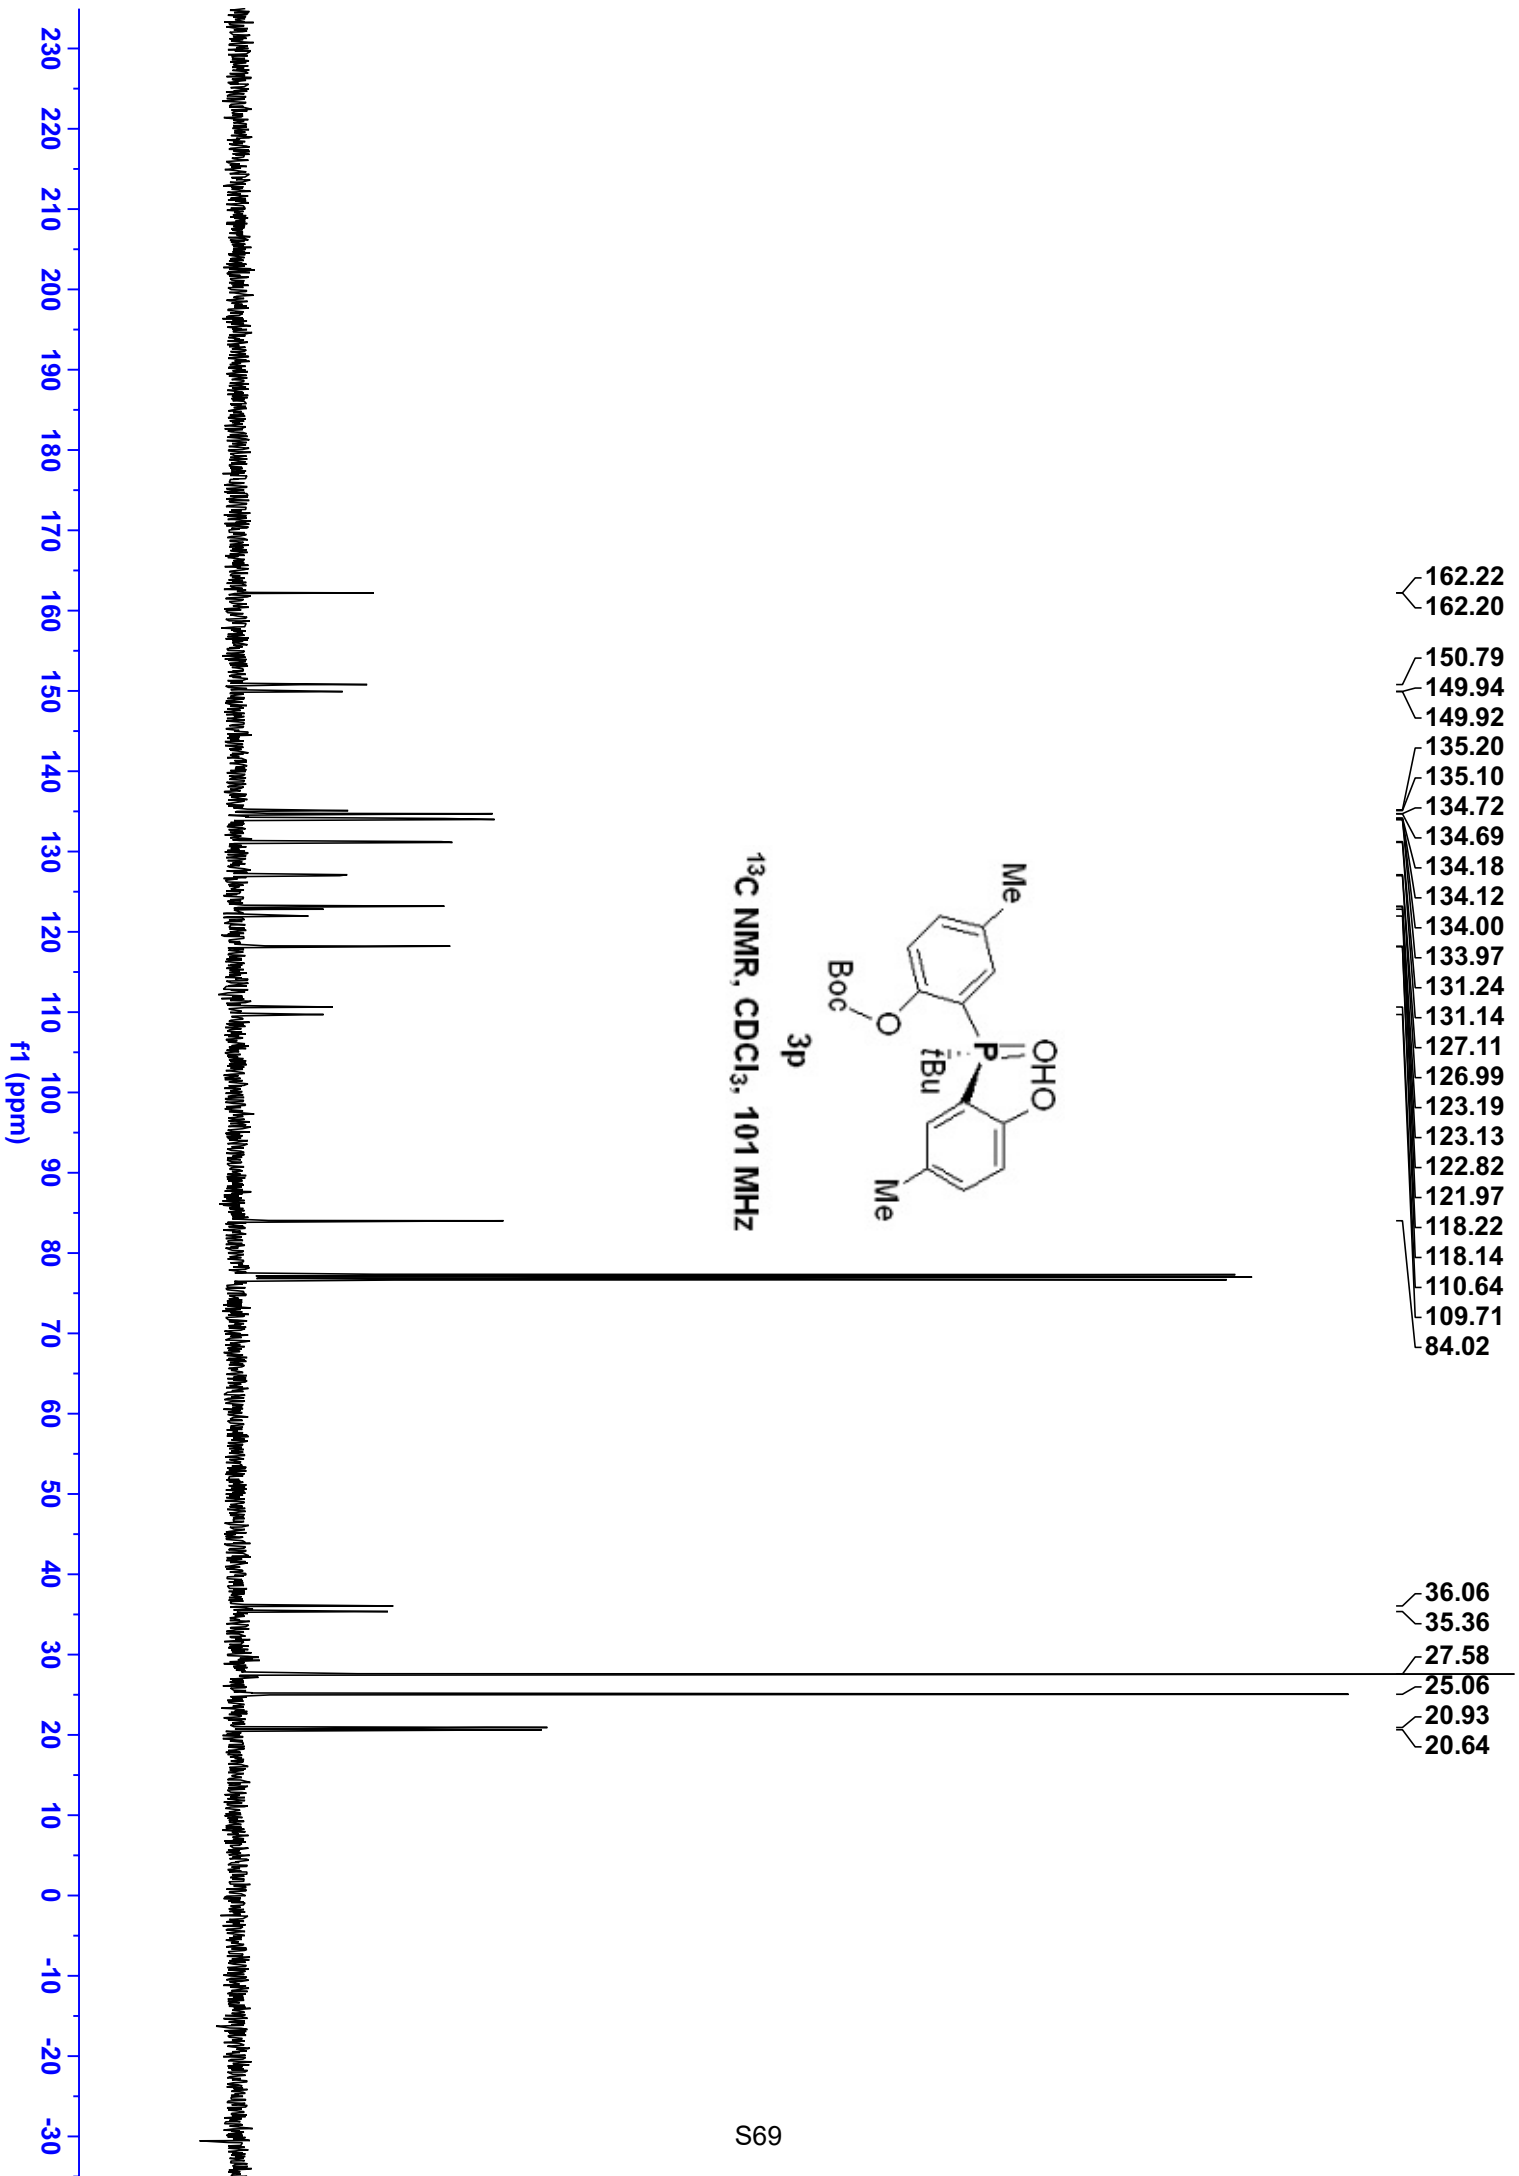

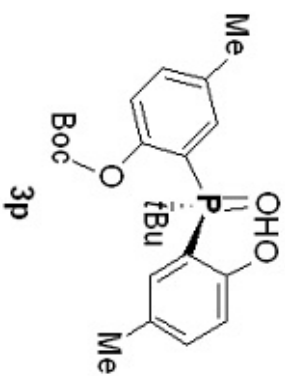

**<sup>31</sup>P NMR, CDCl<sub>3</sub>, 162 MHz**

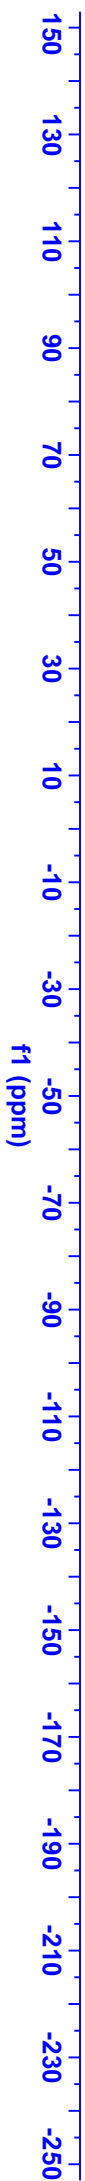

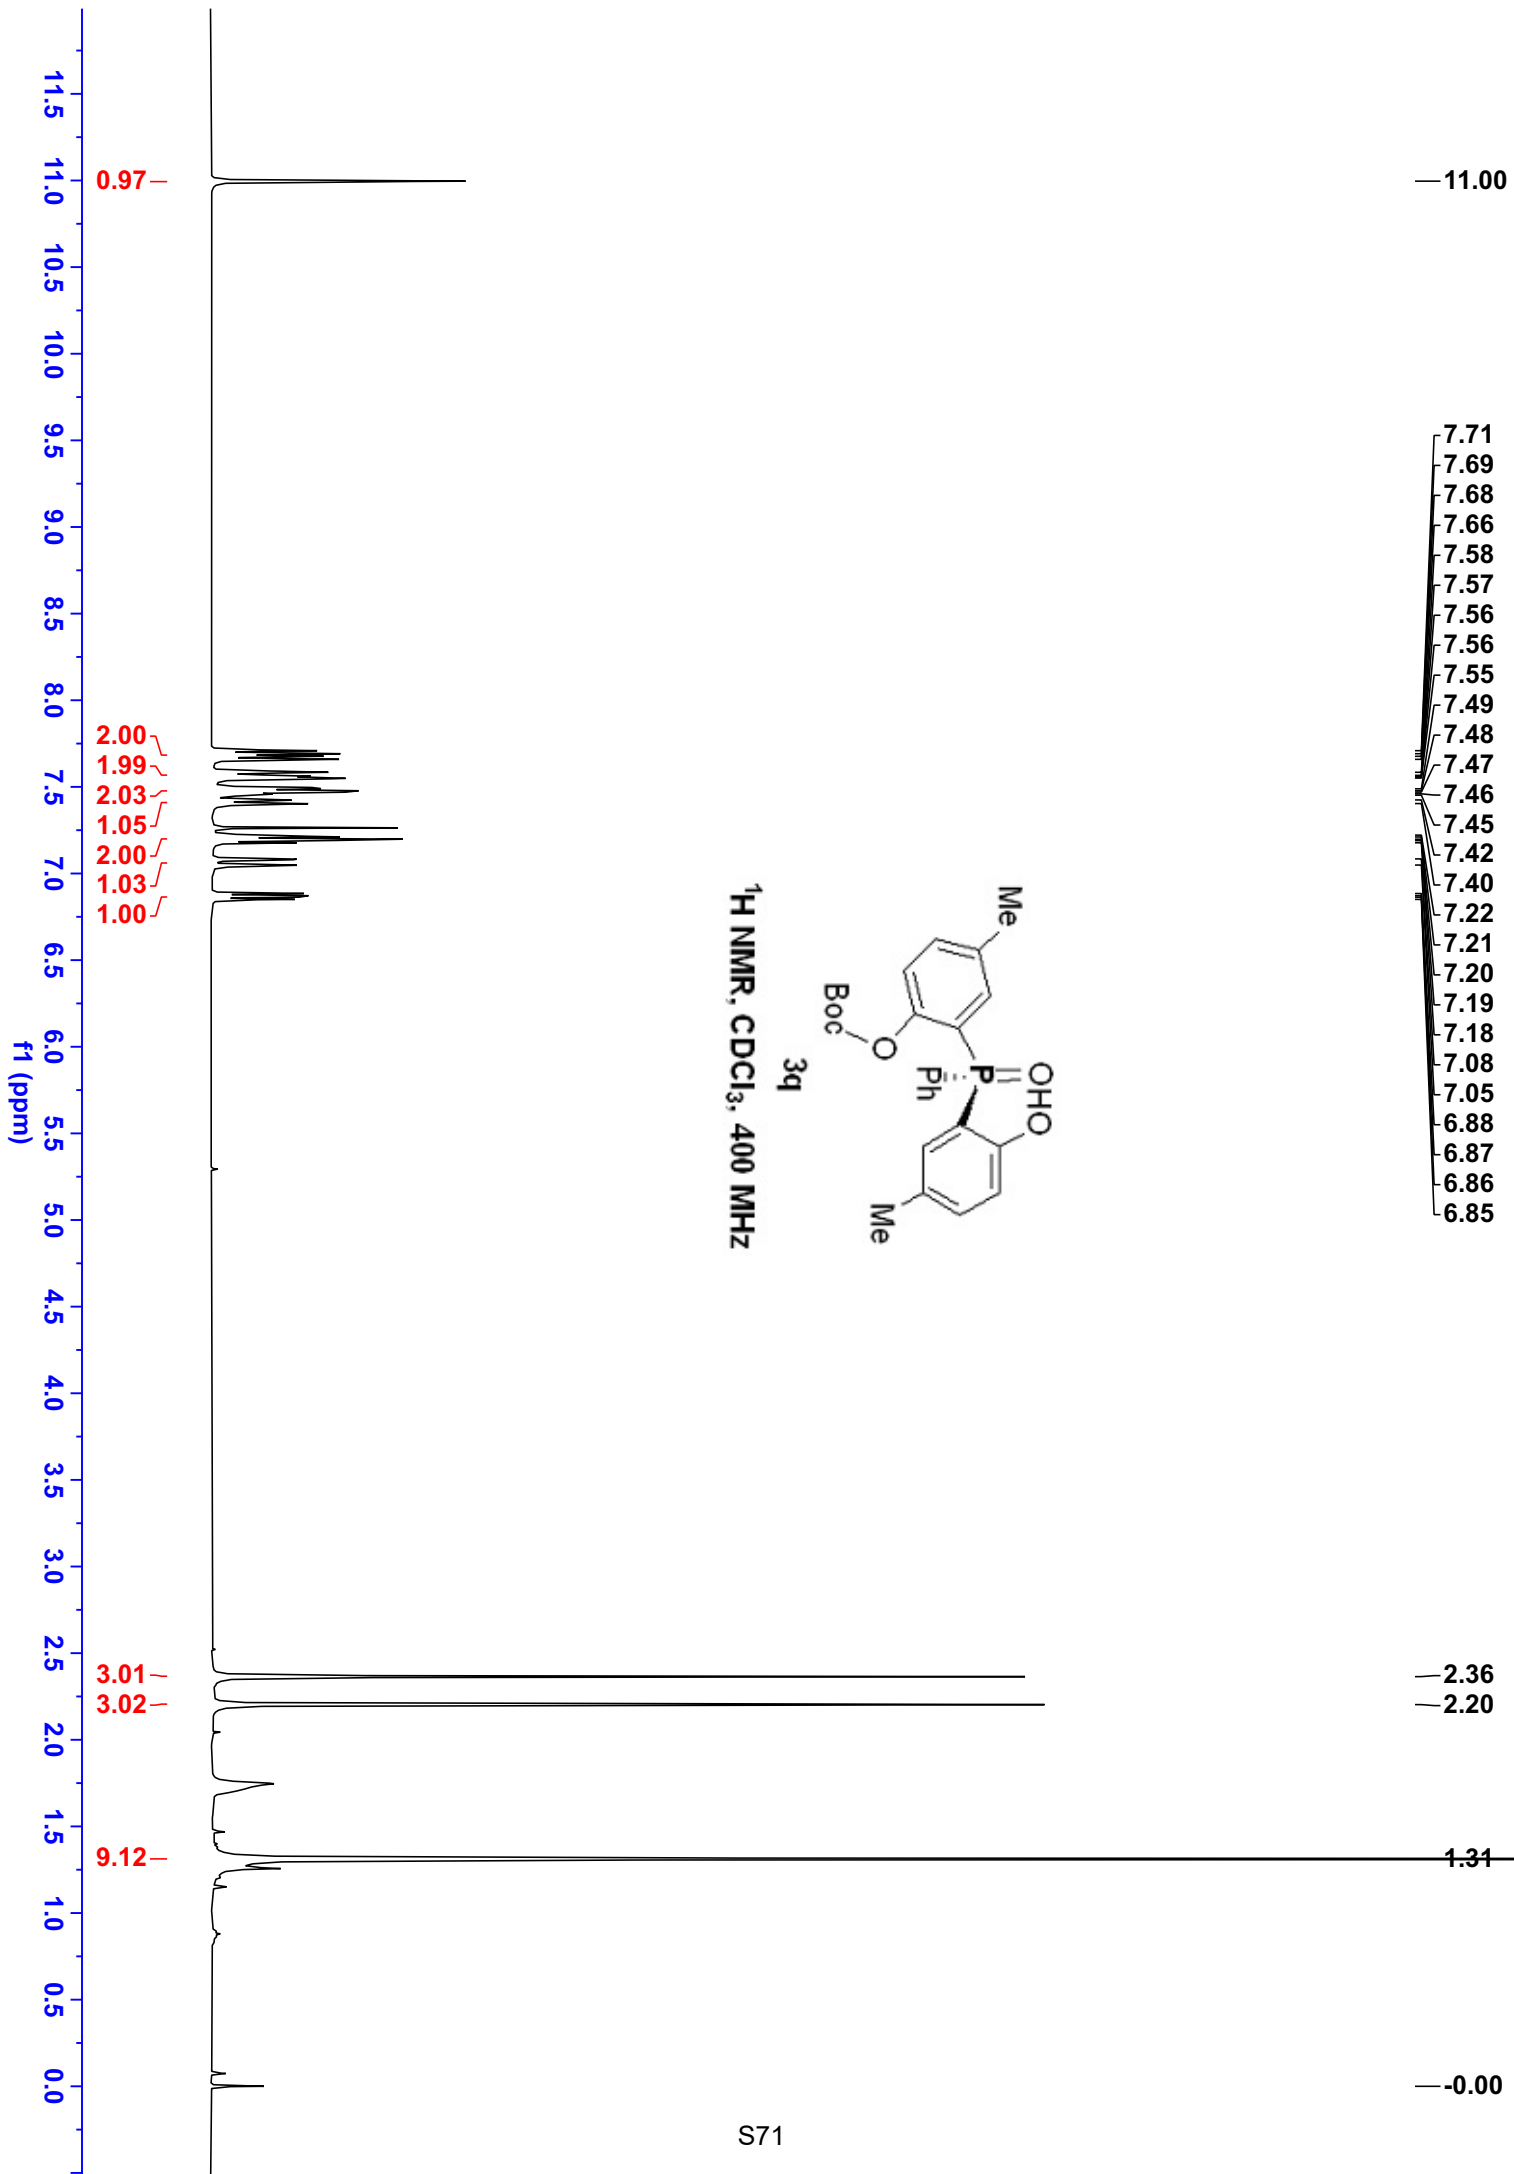

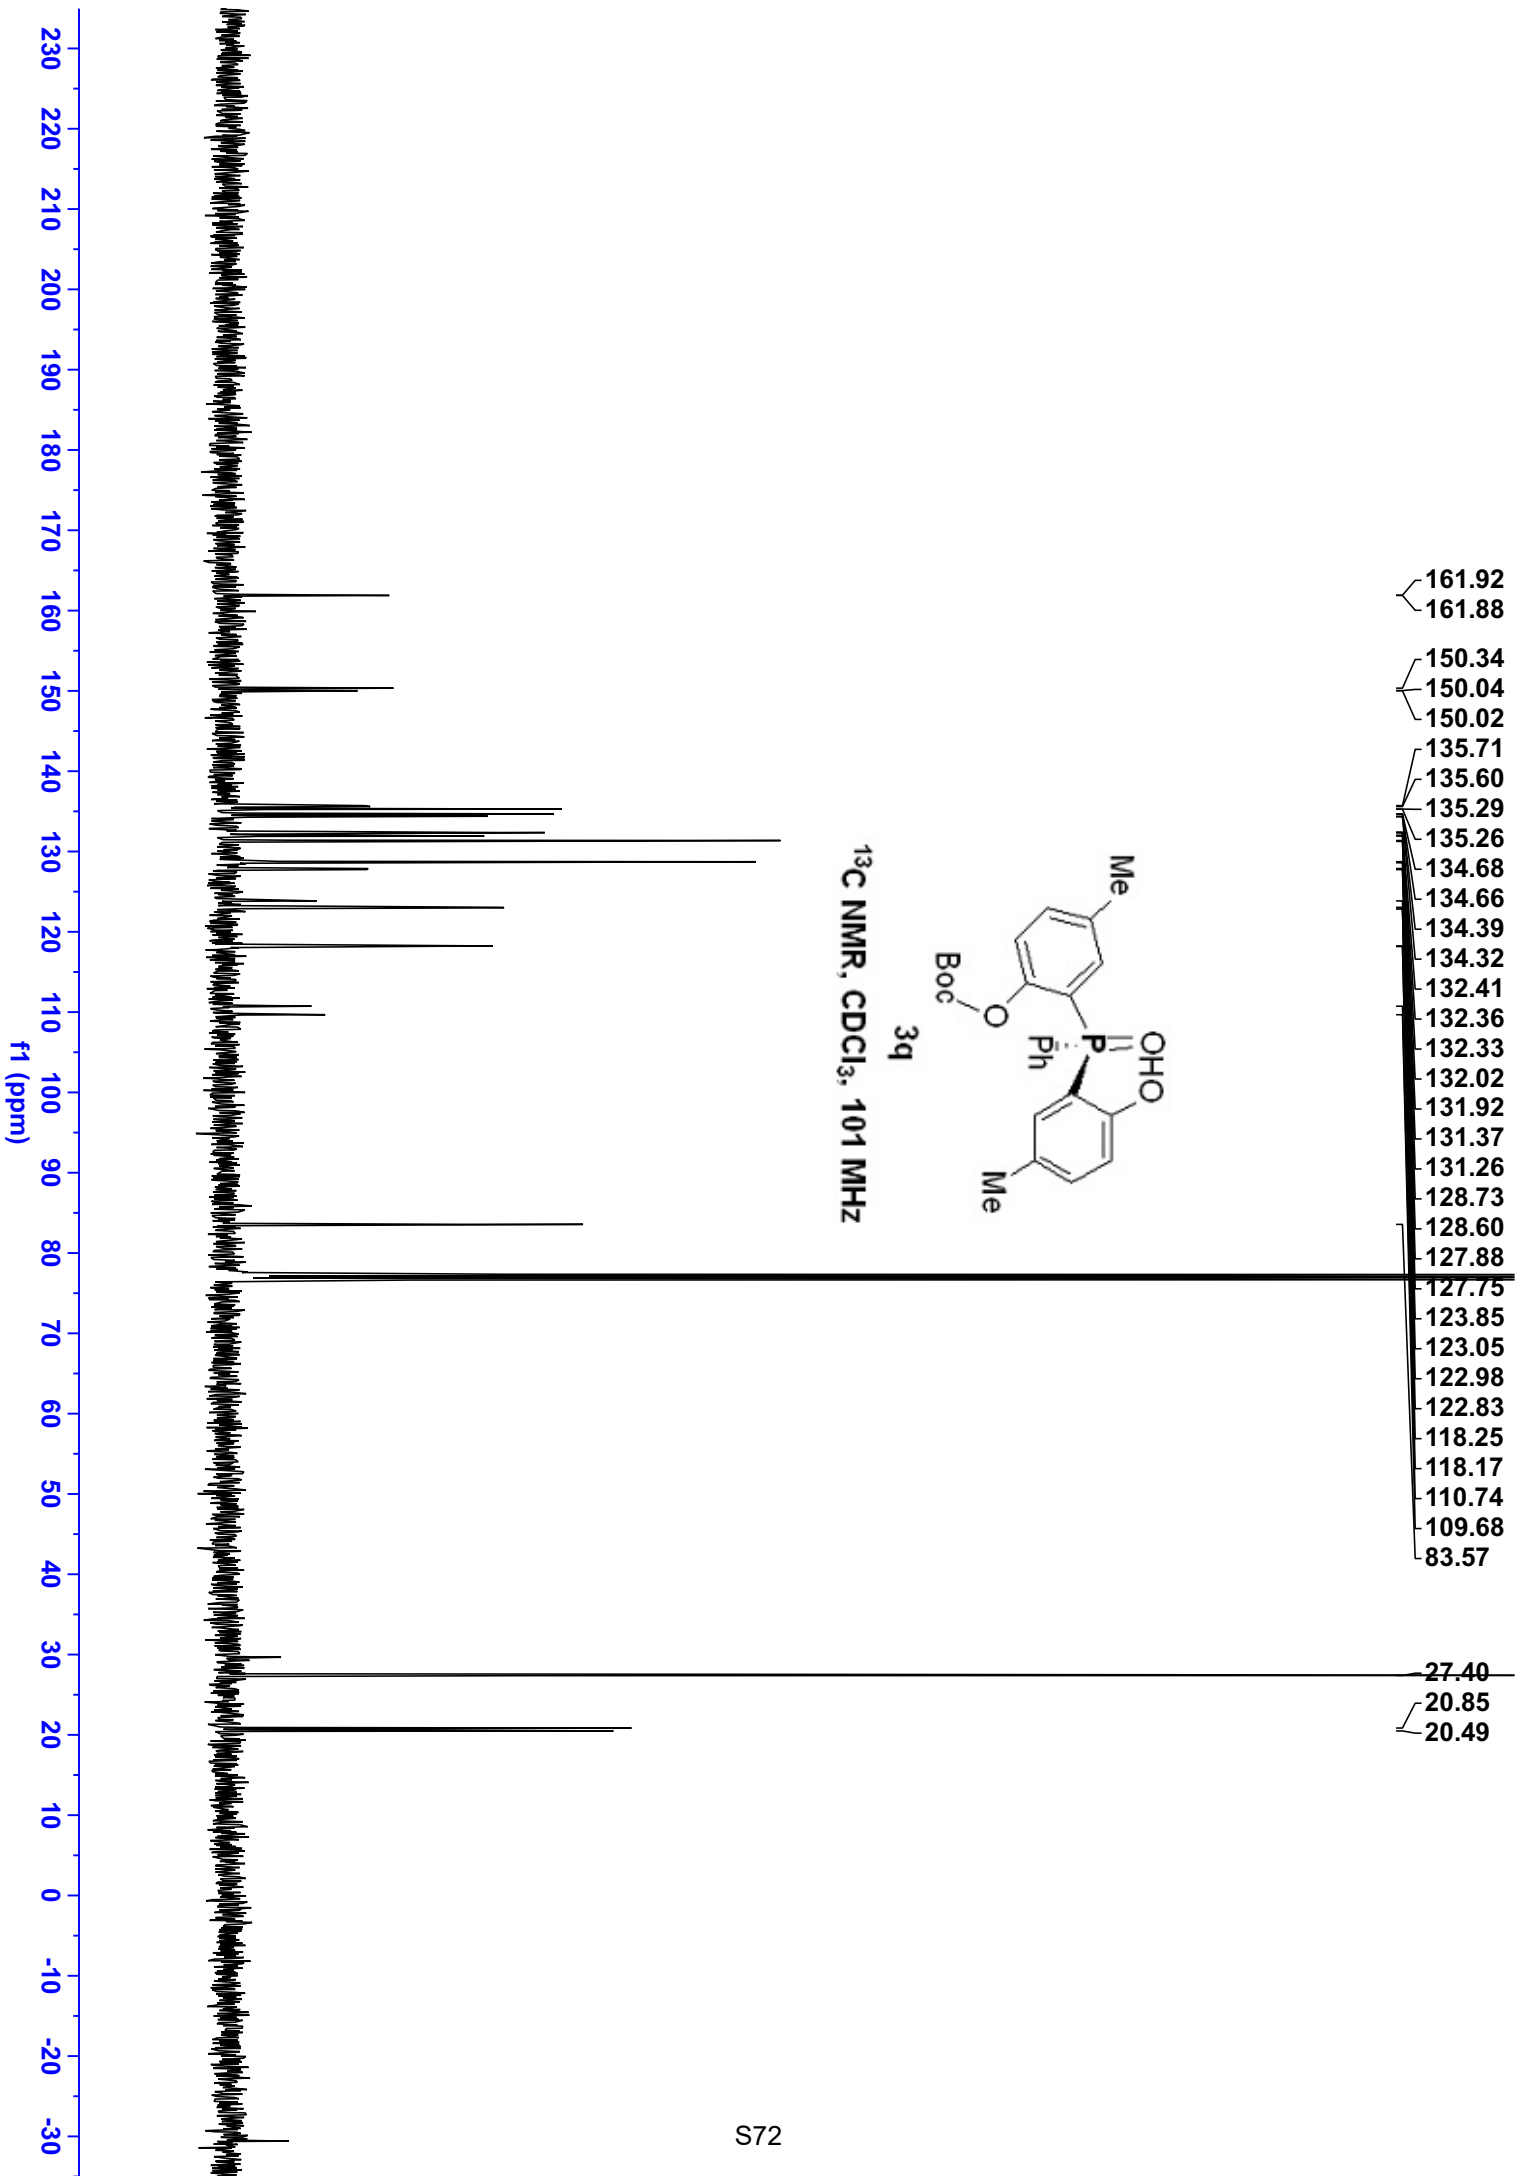

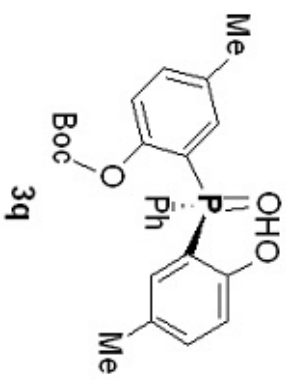

<sup>31</sup>P NMR, CDCl<sub>3</sub>, 162 MHz

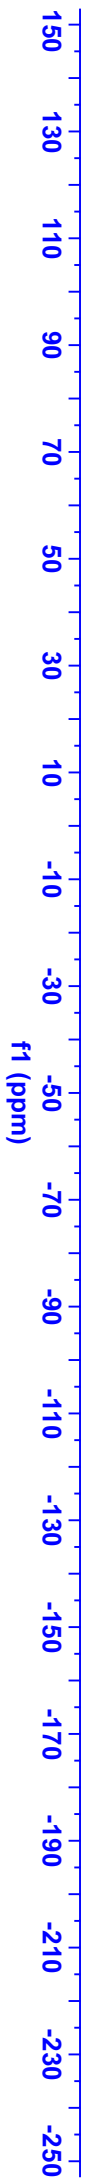

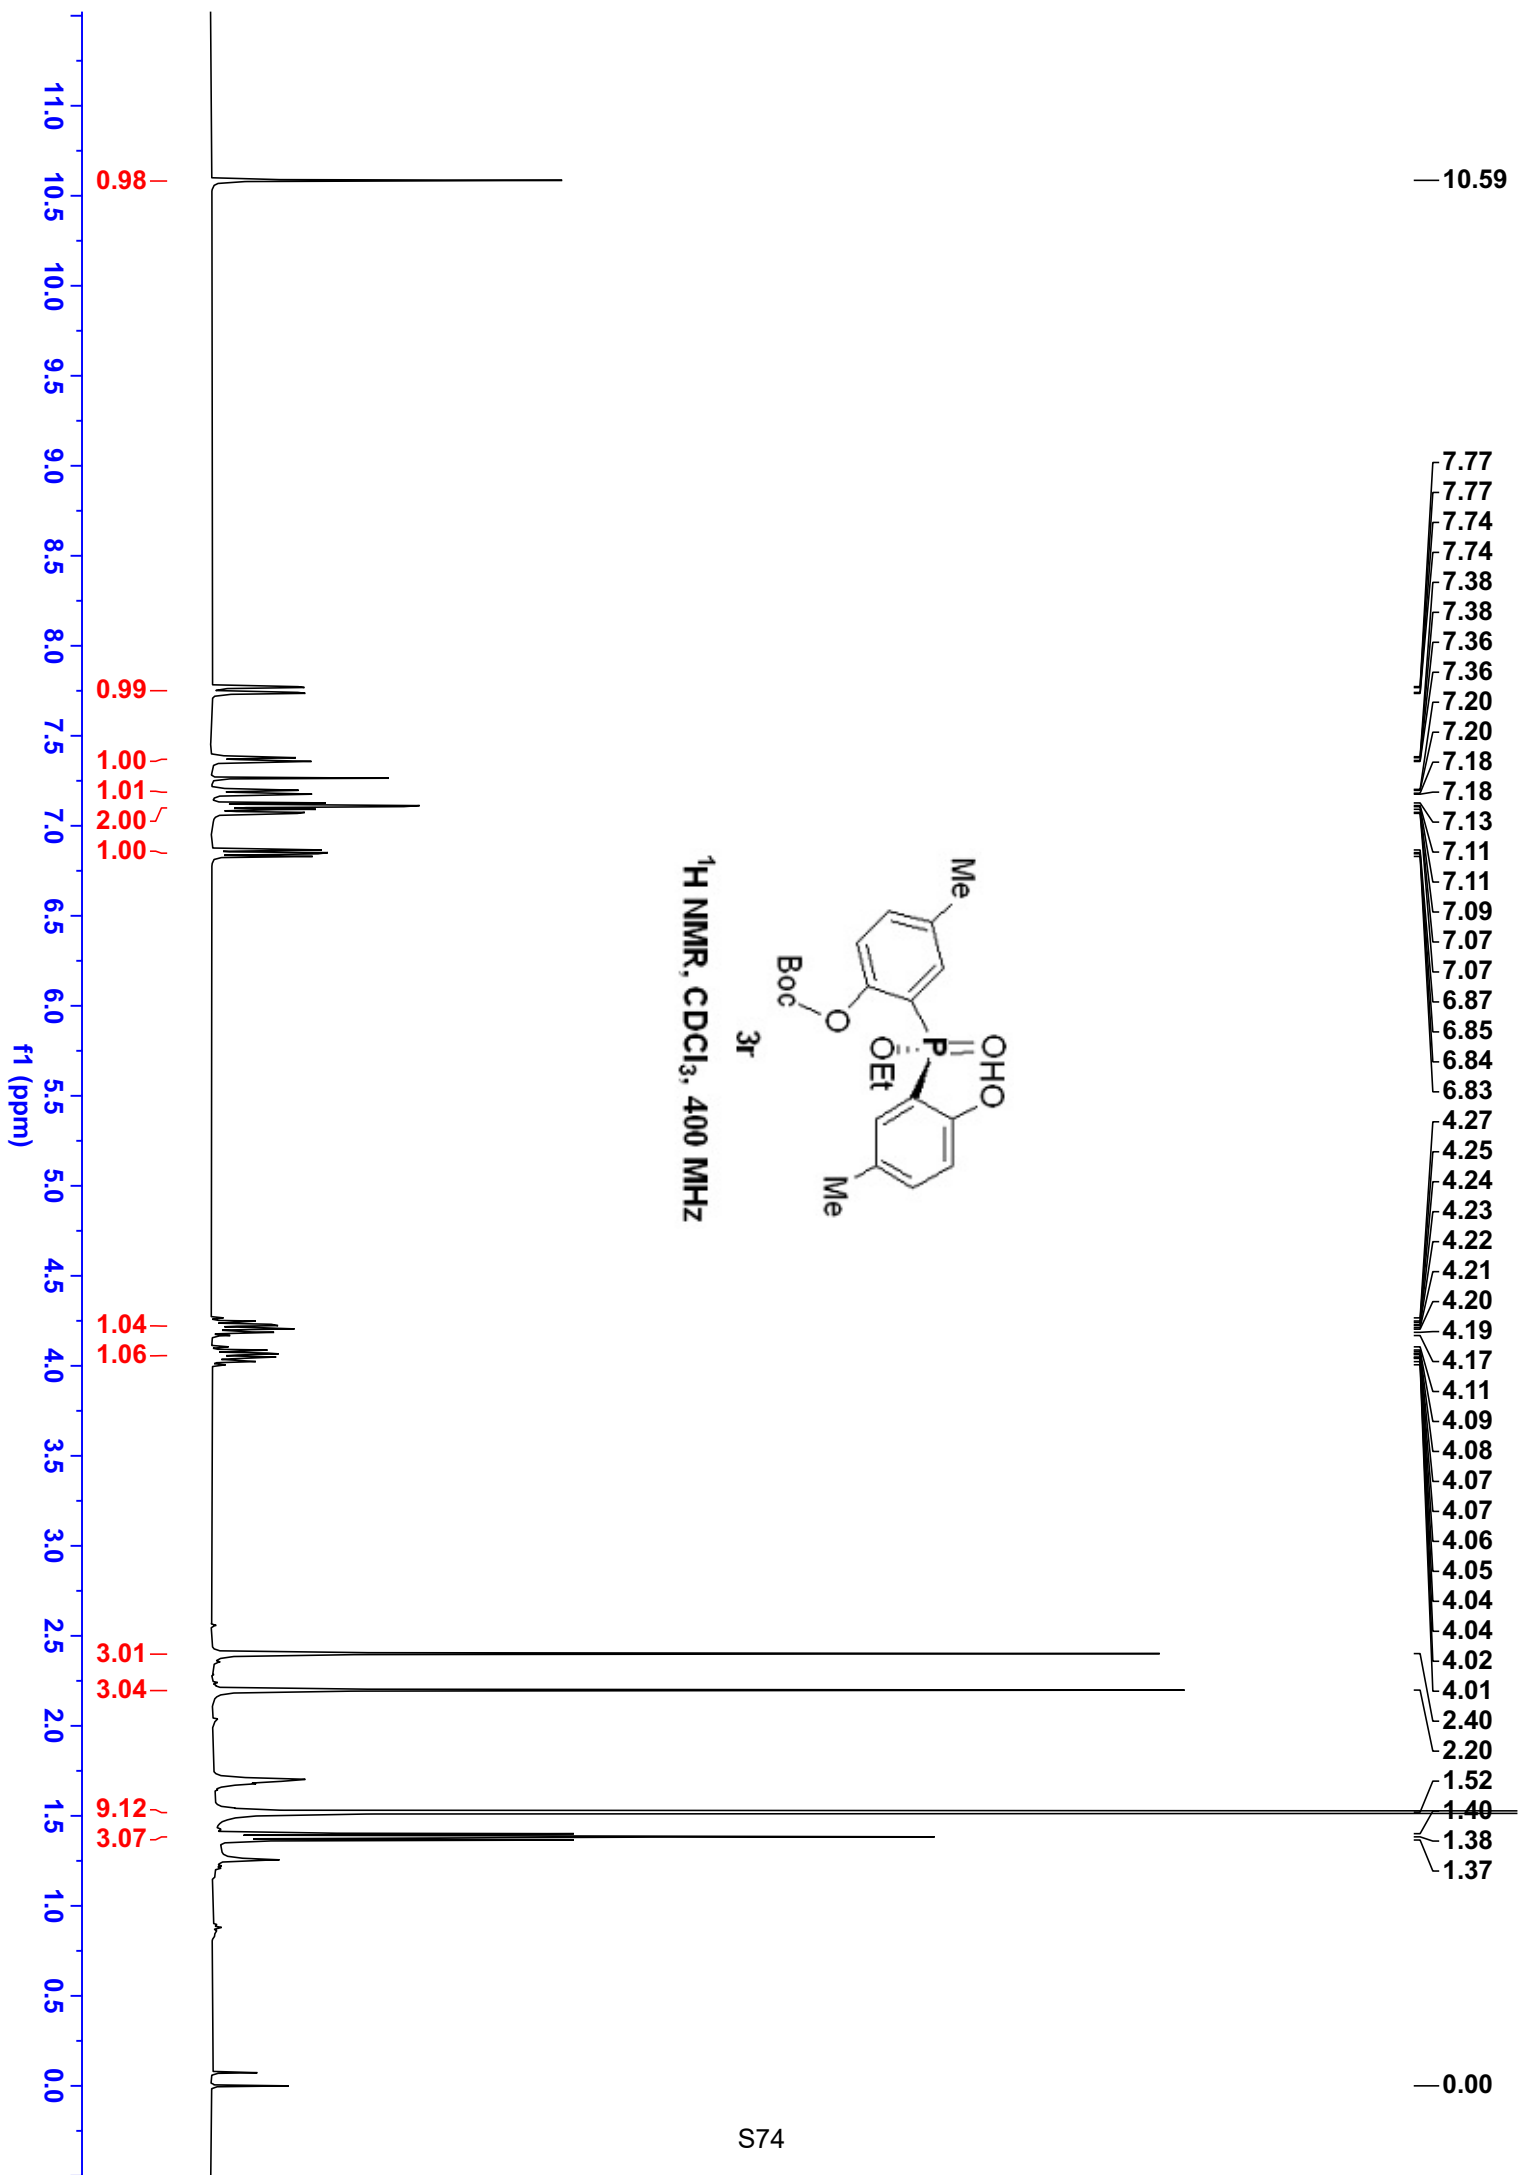

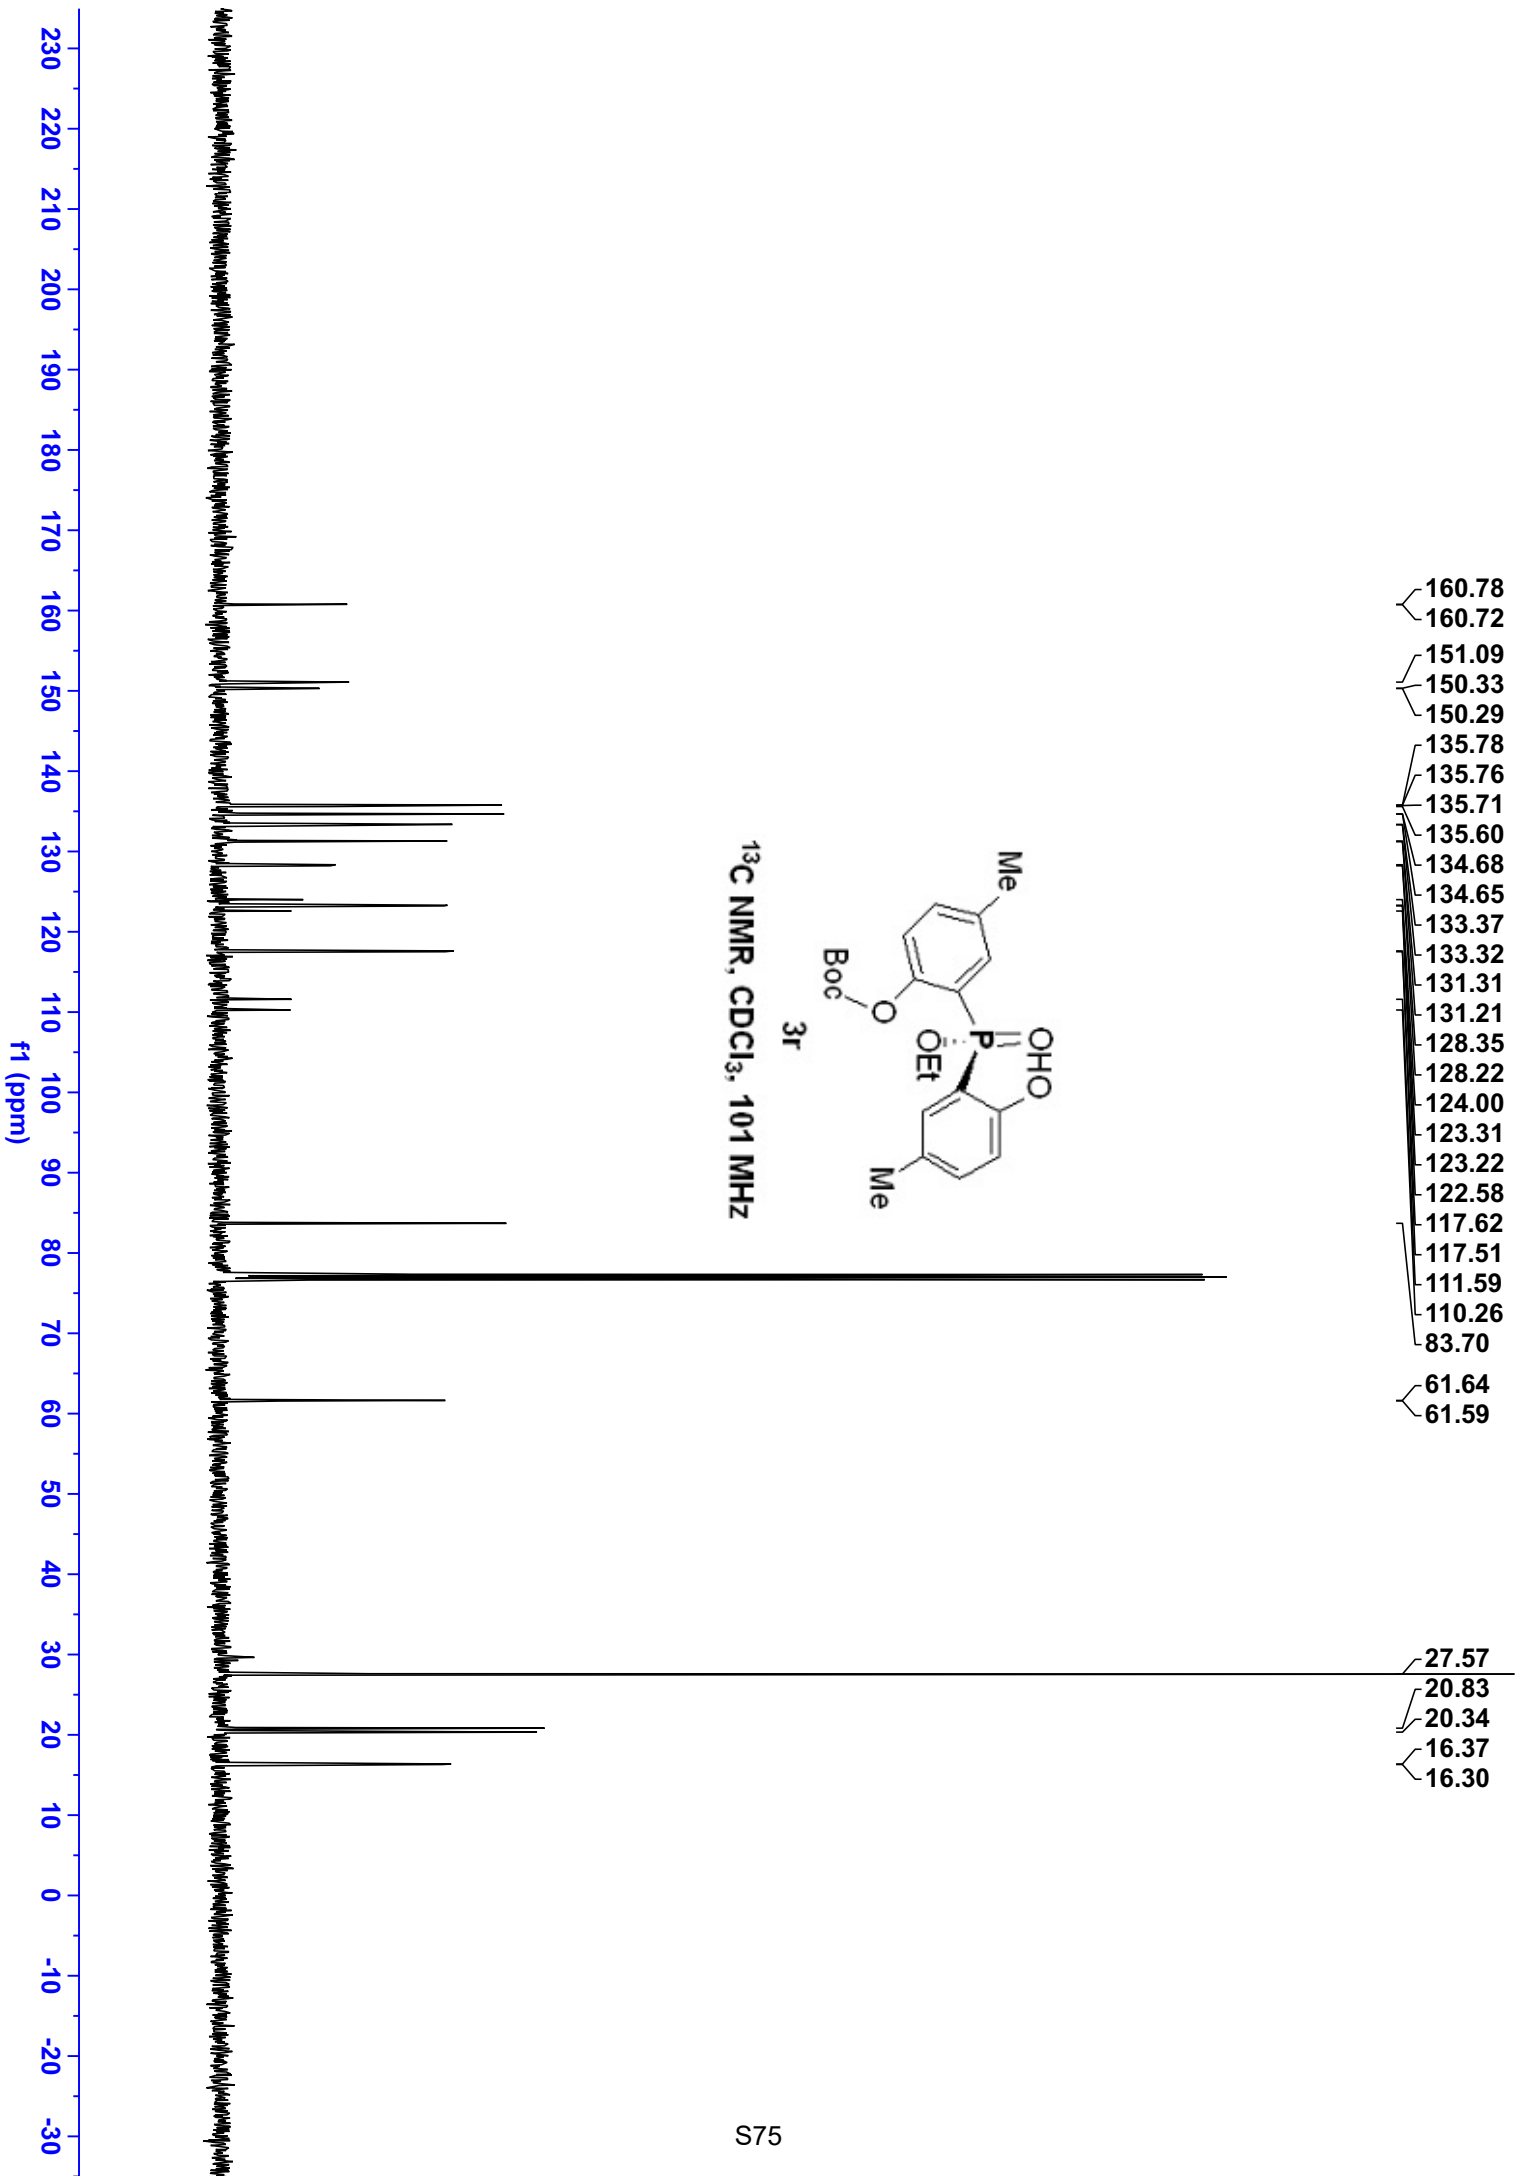

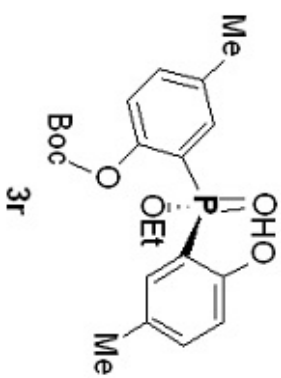

$^{31}\text{P}$  NMR,  $\text{CDCl}_3$ , 162 MHz



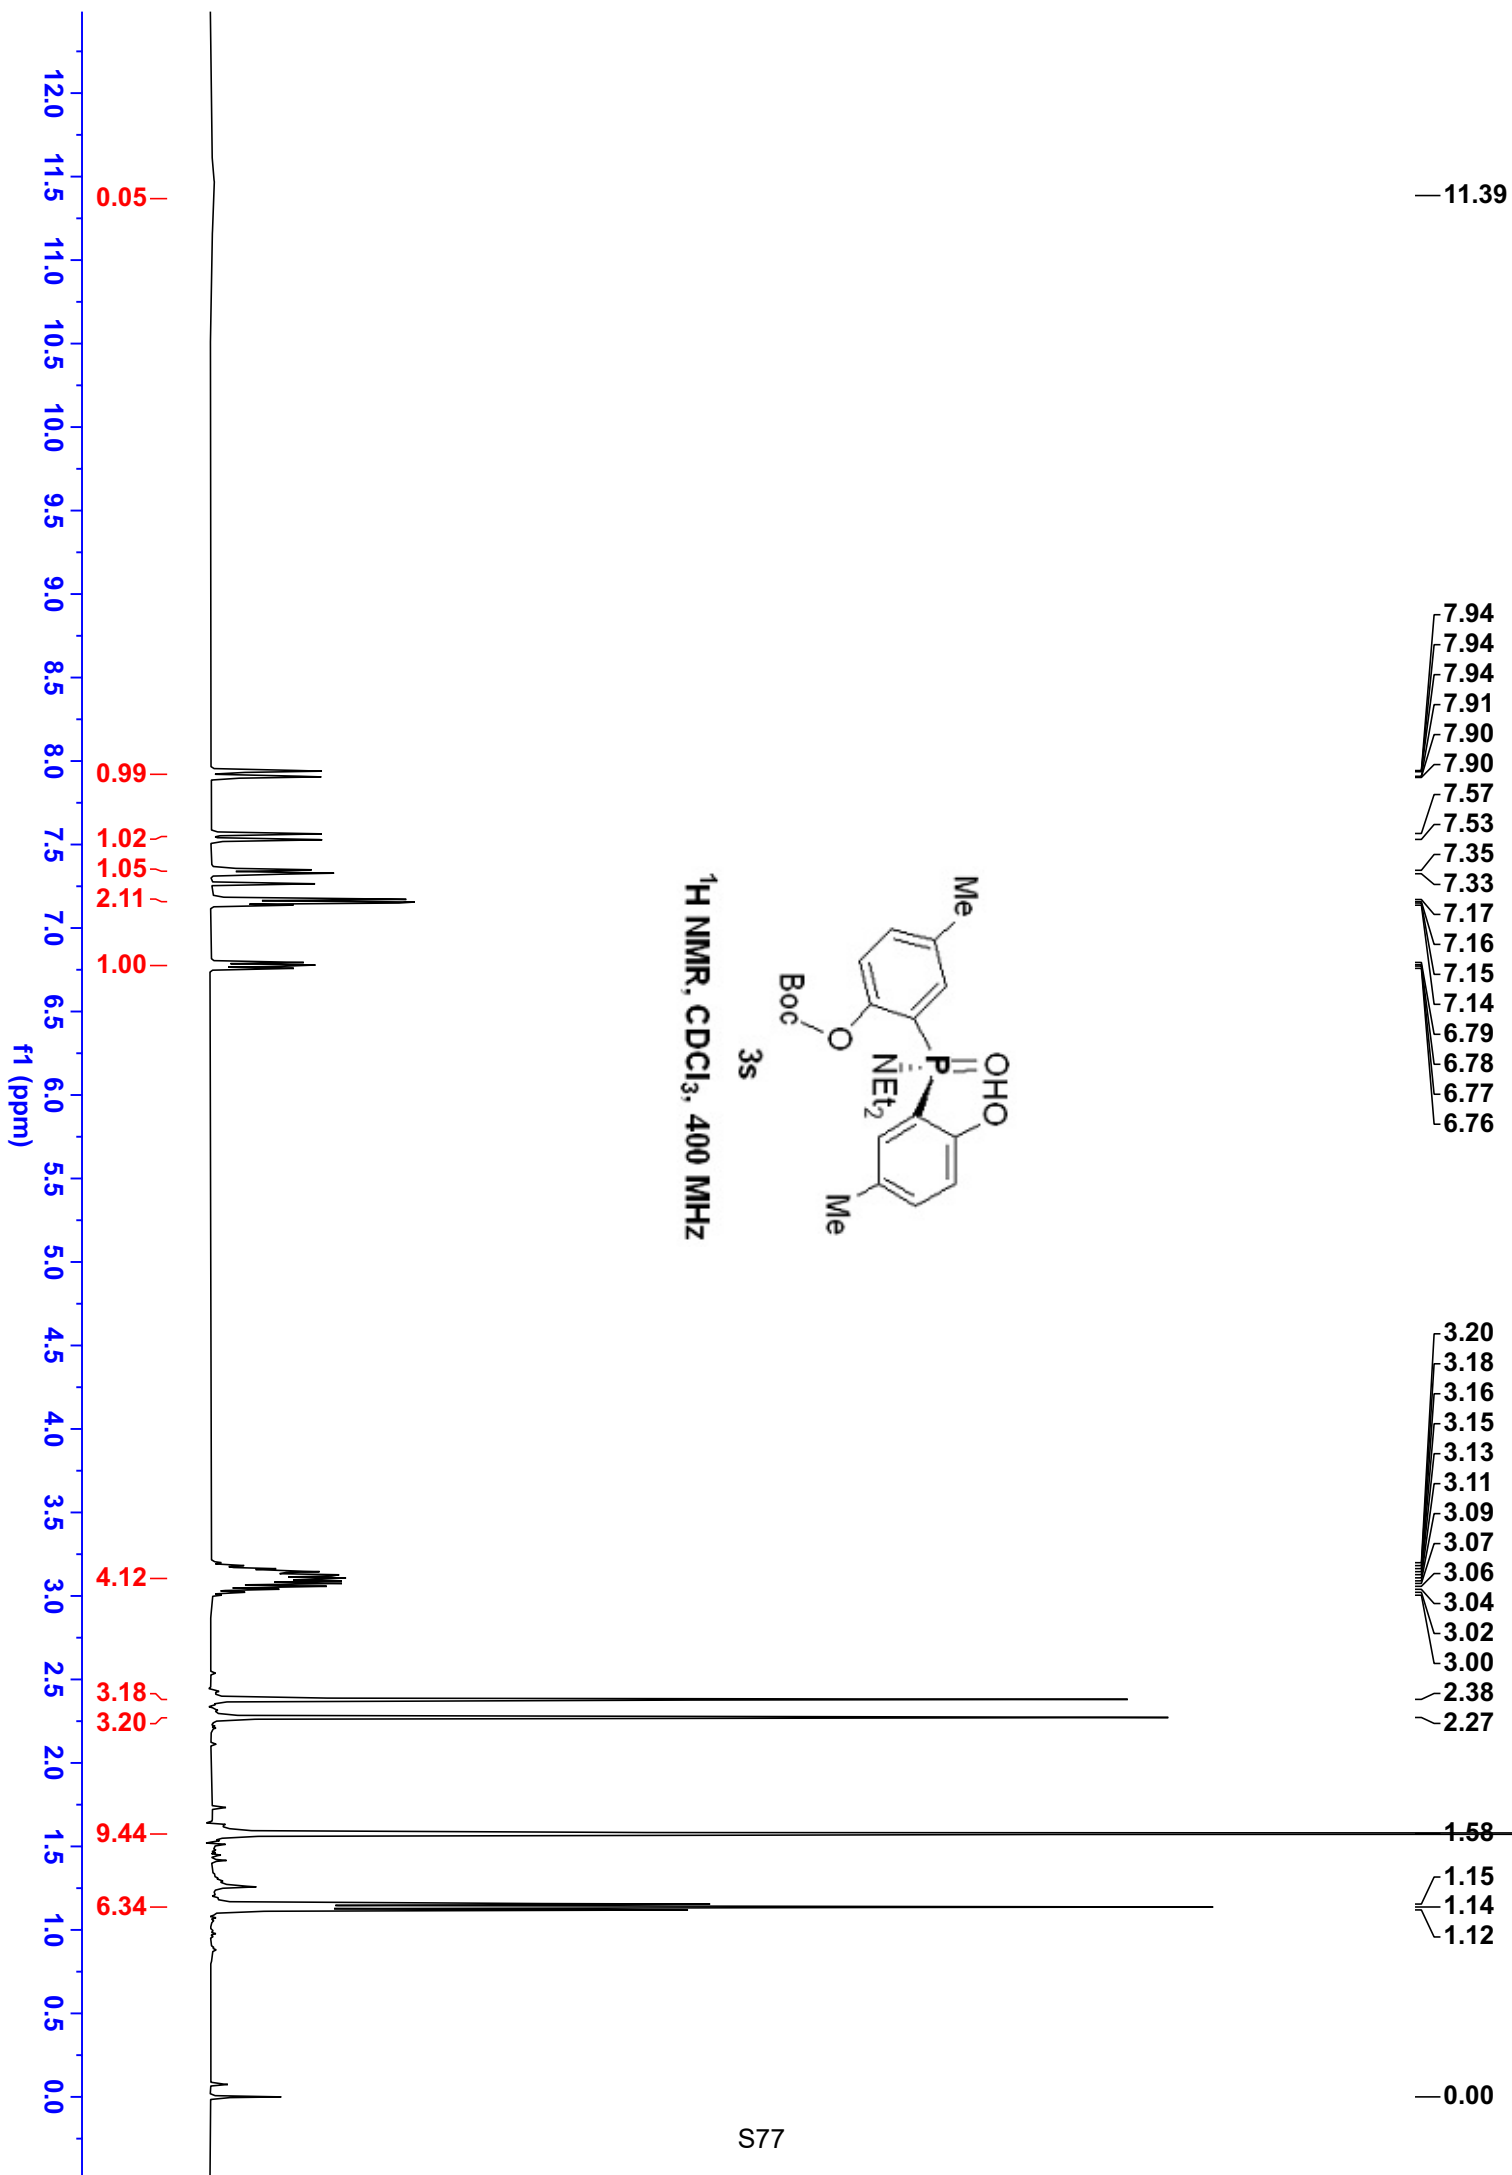

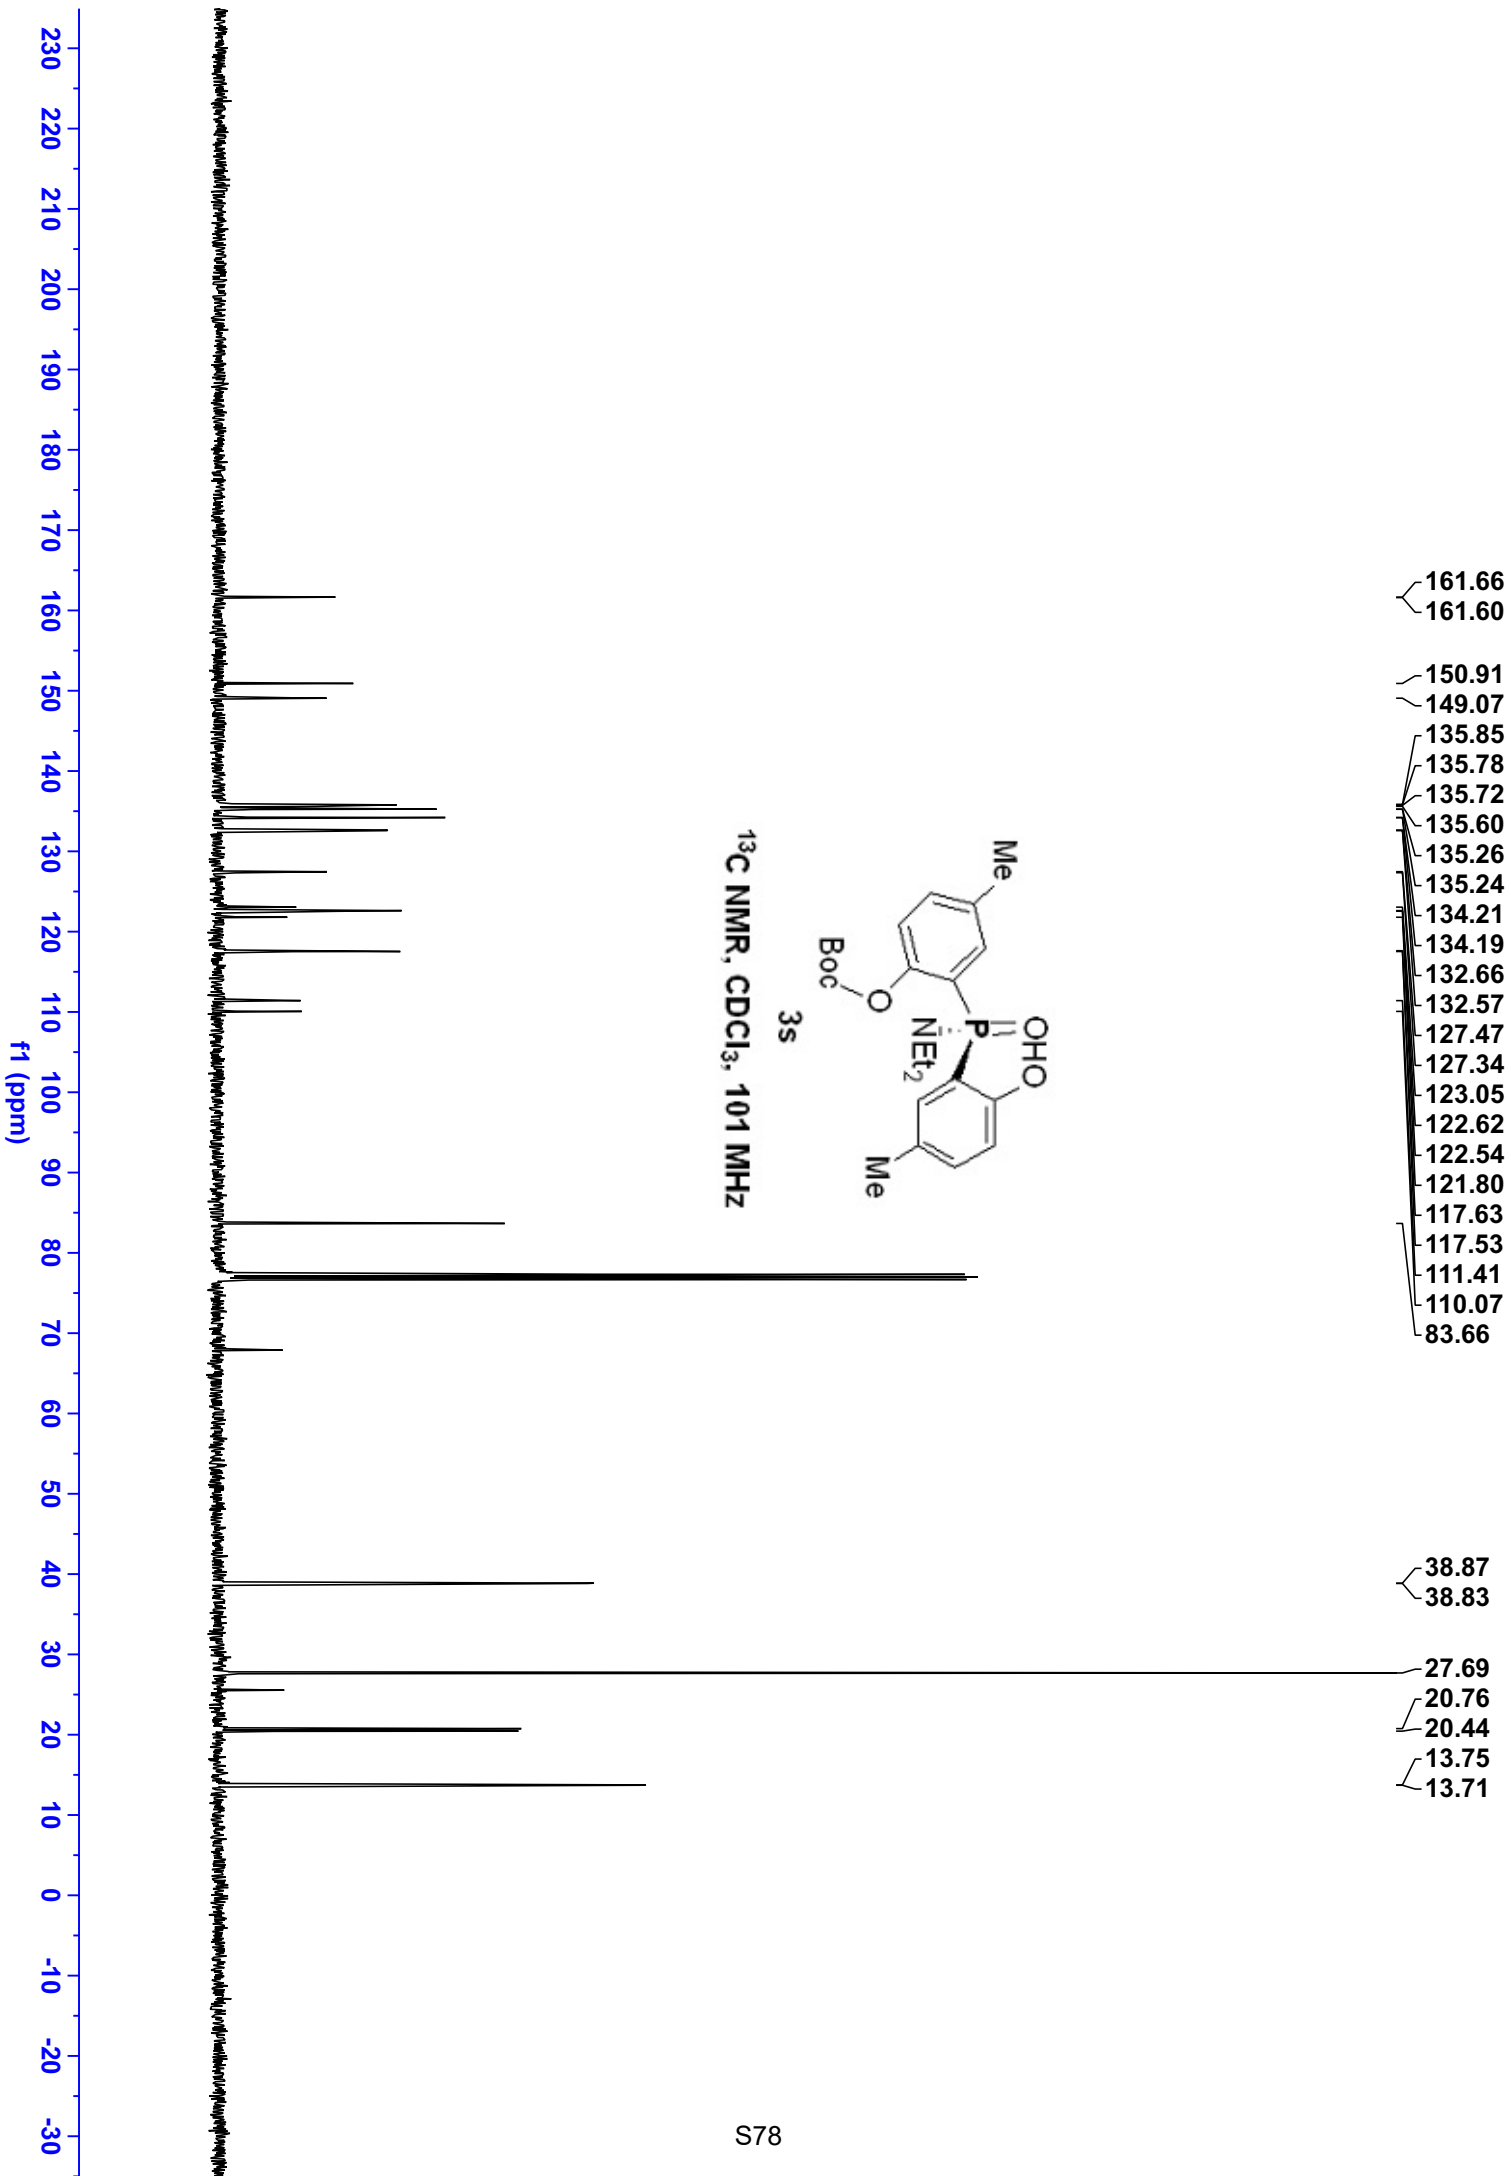

— 36.70

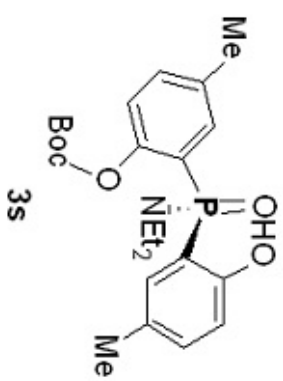

<sup>31</sup>P NMR, CDCl<sub>3</sub>, 162 MHz



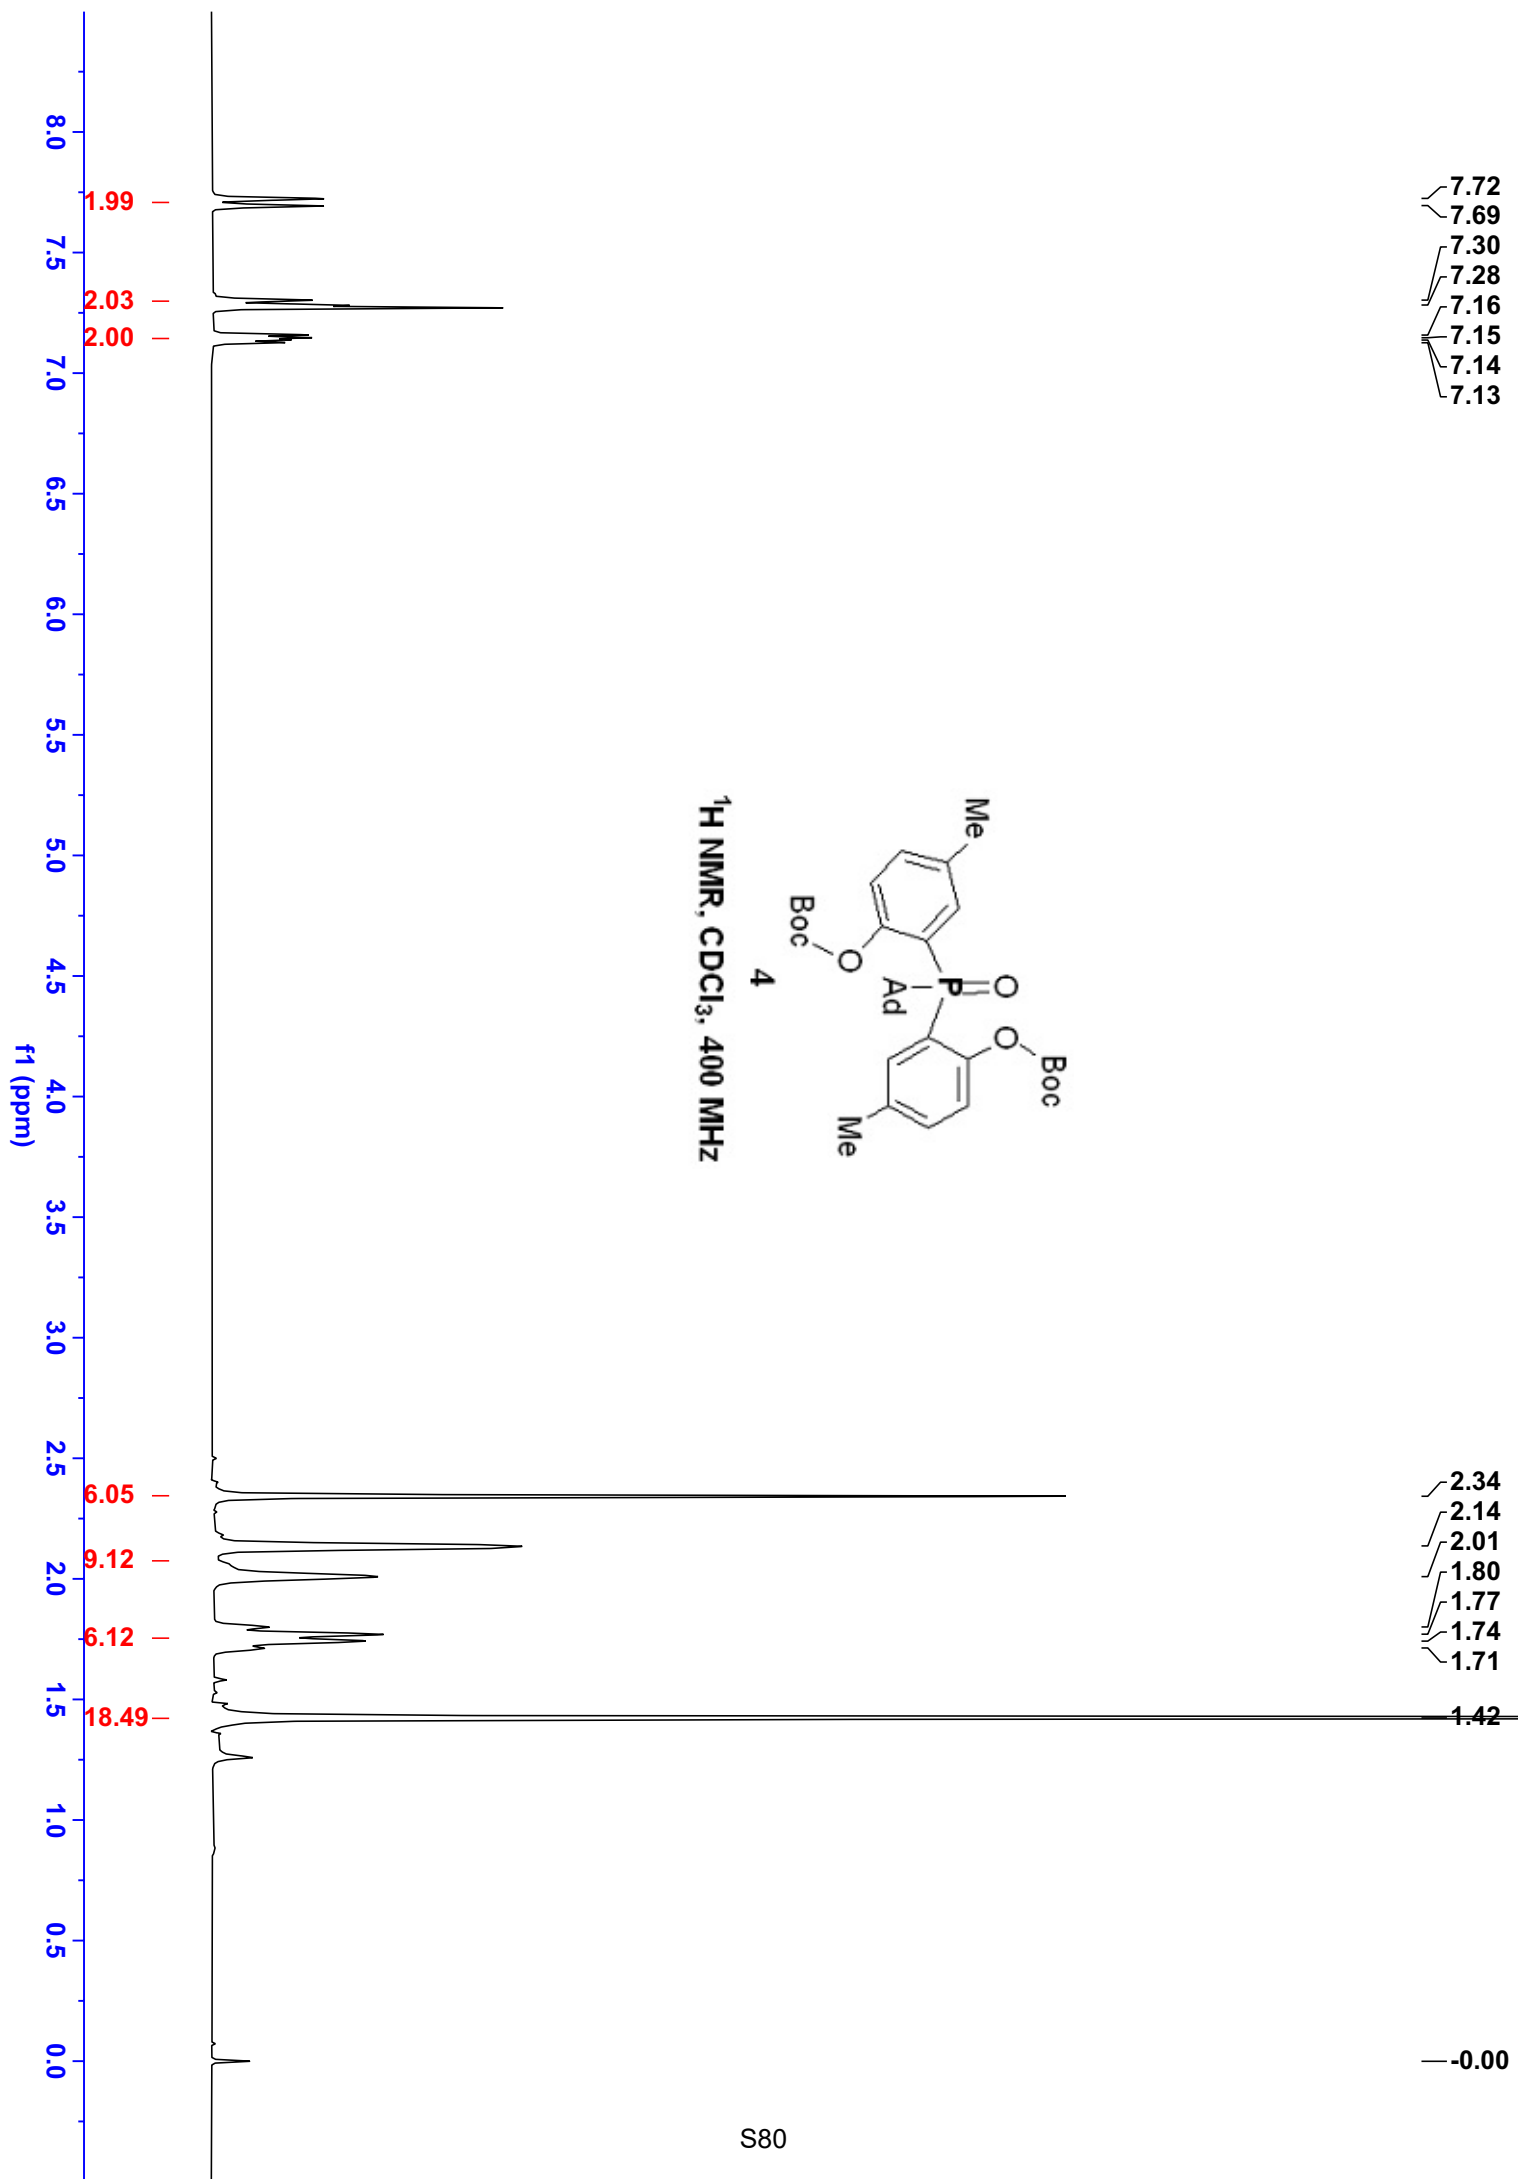

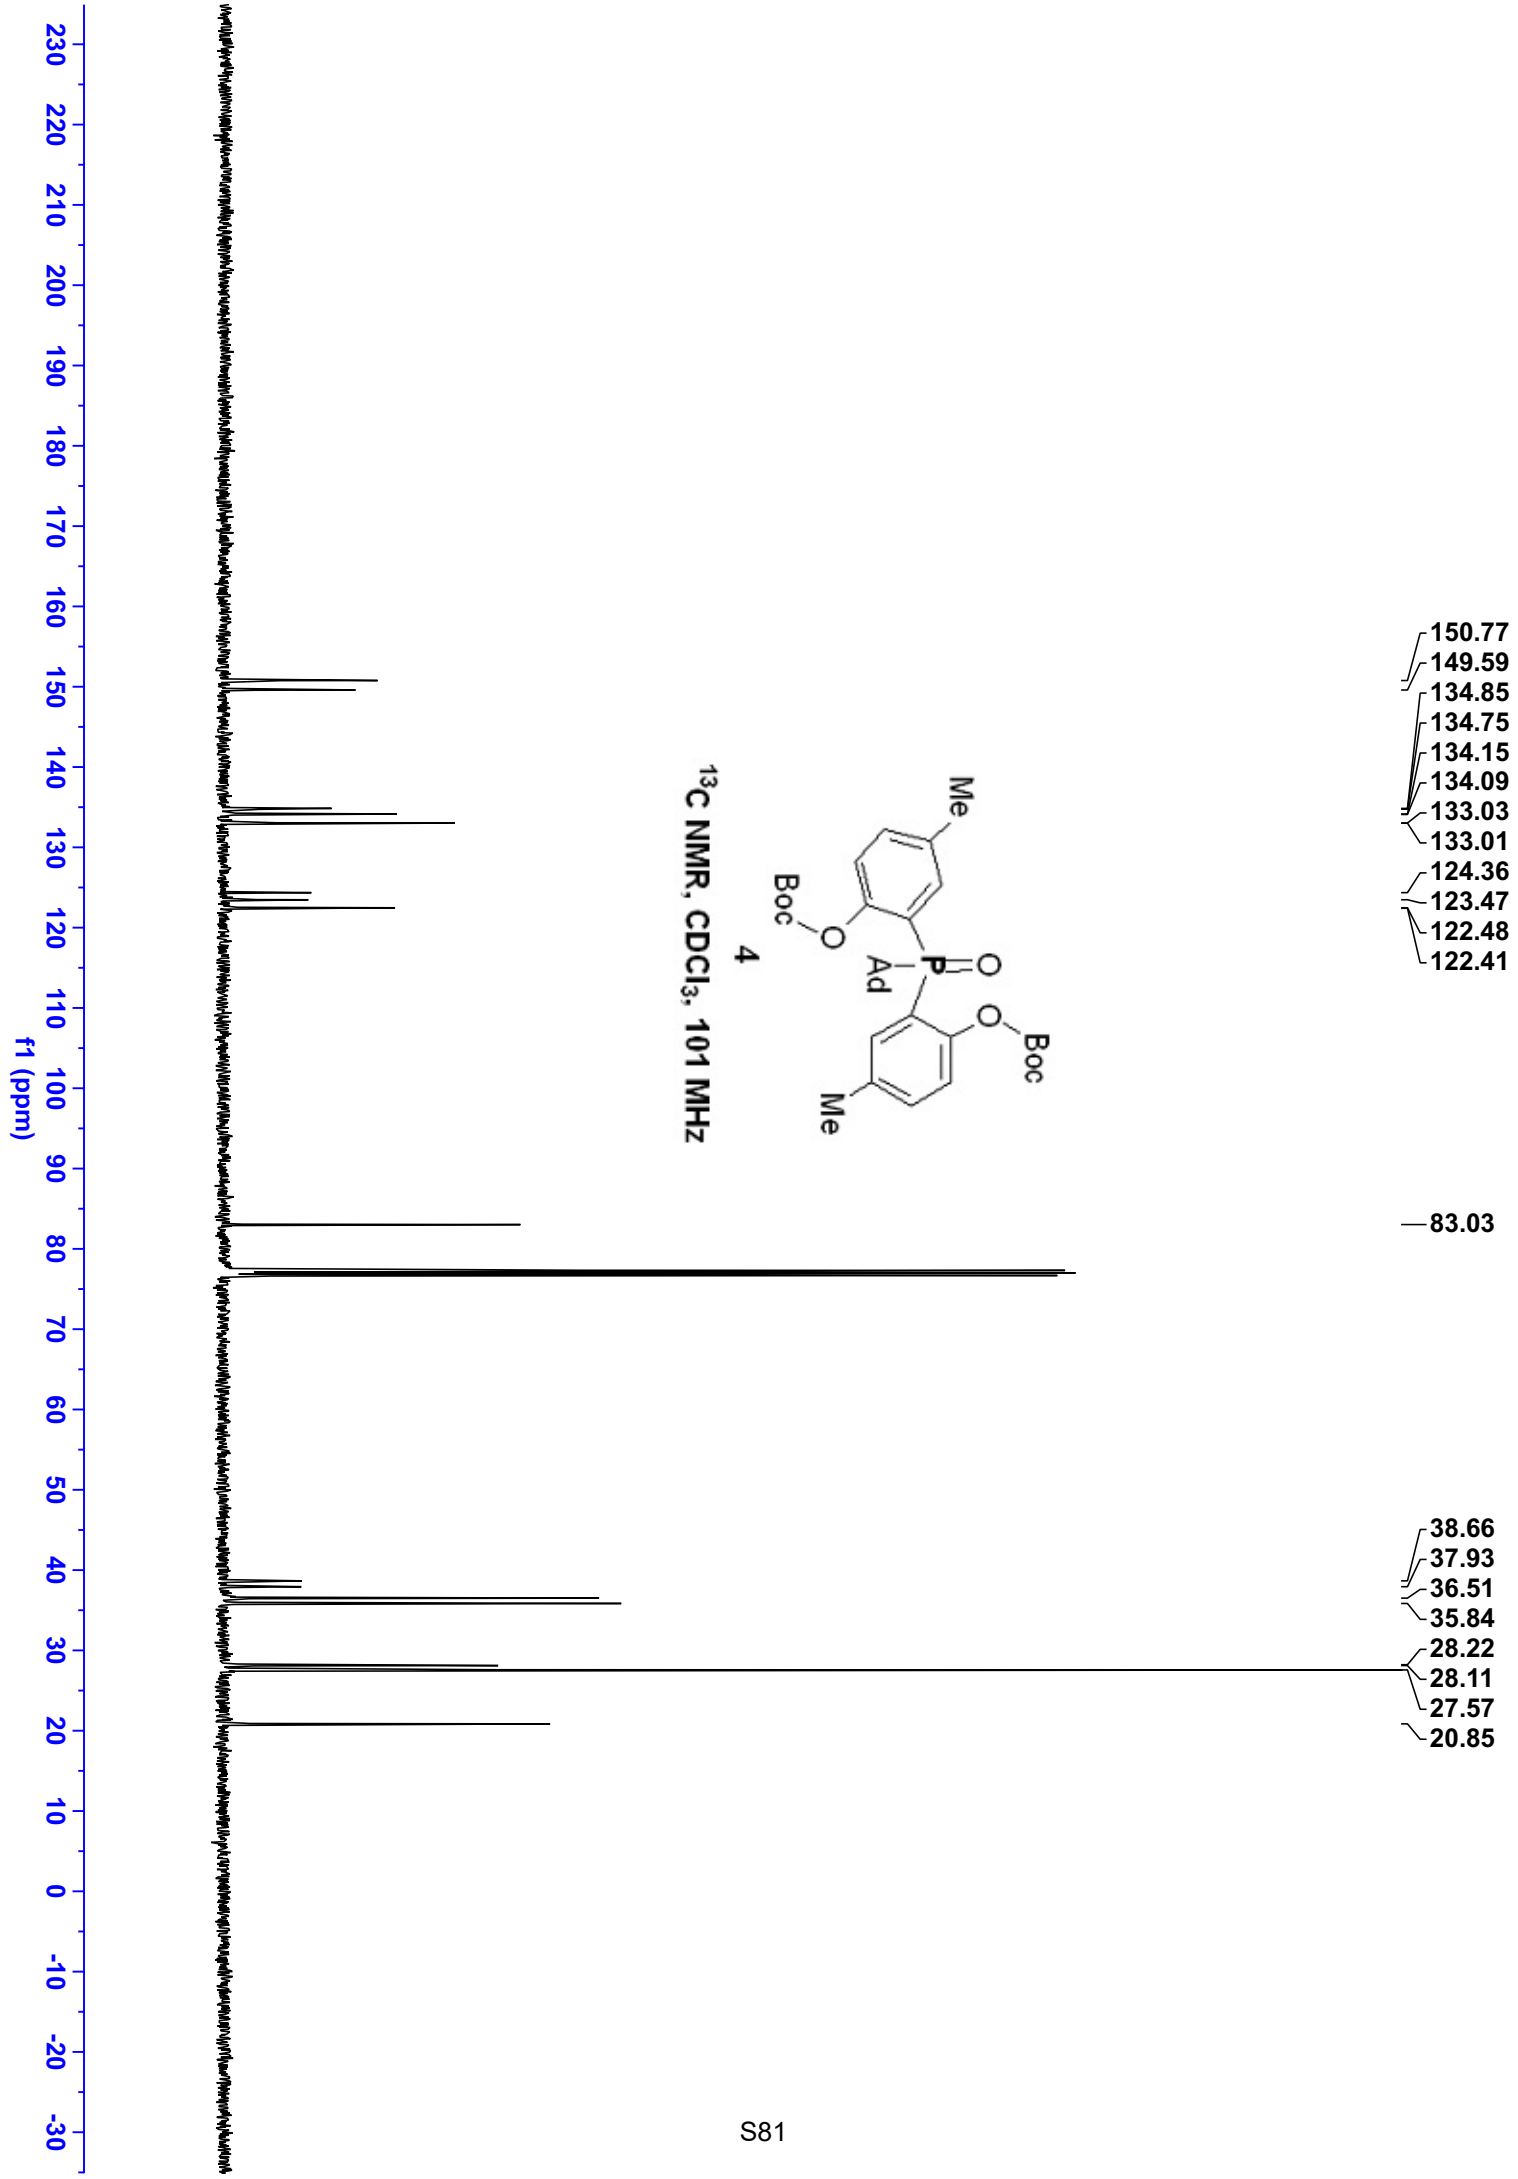

— 38.89

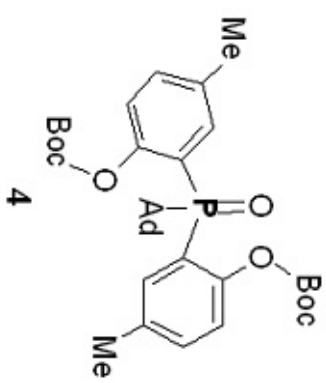

<sup>31</sup>P NMR, CDCl<sub>3</sub>, 162 MHz

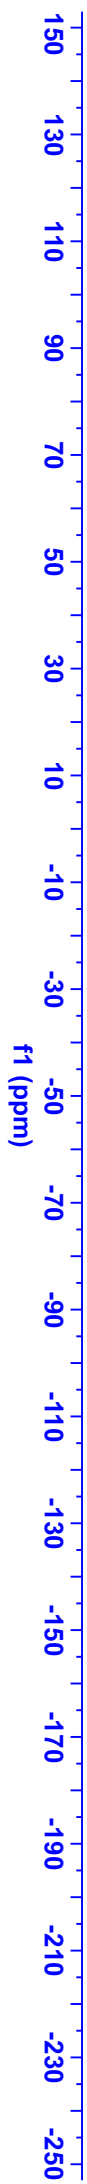

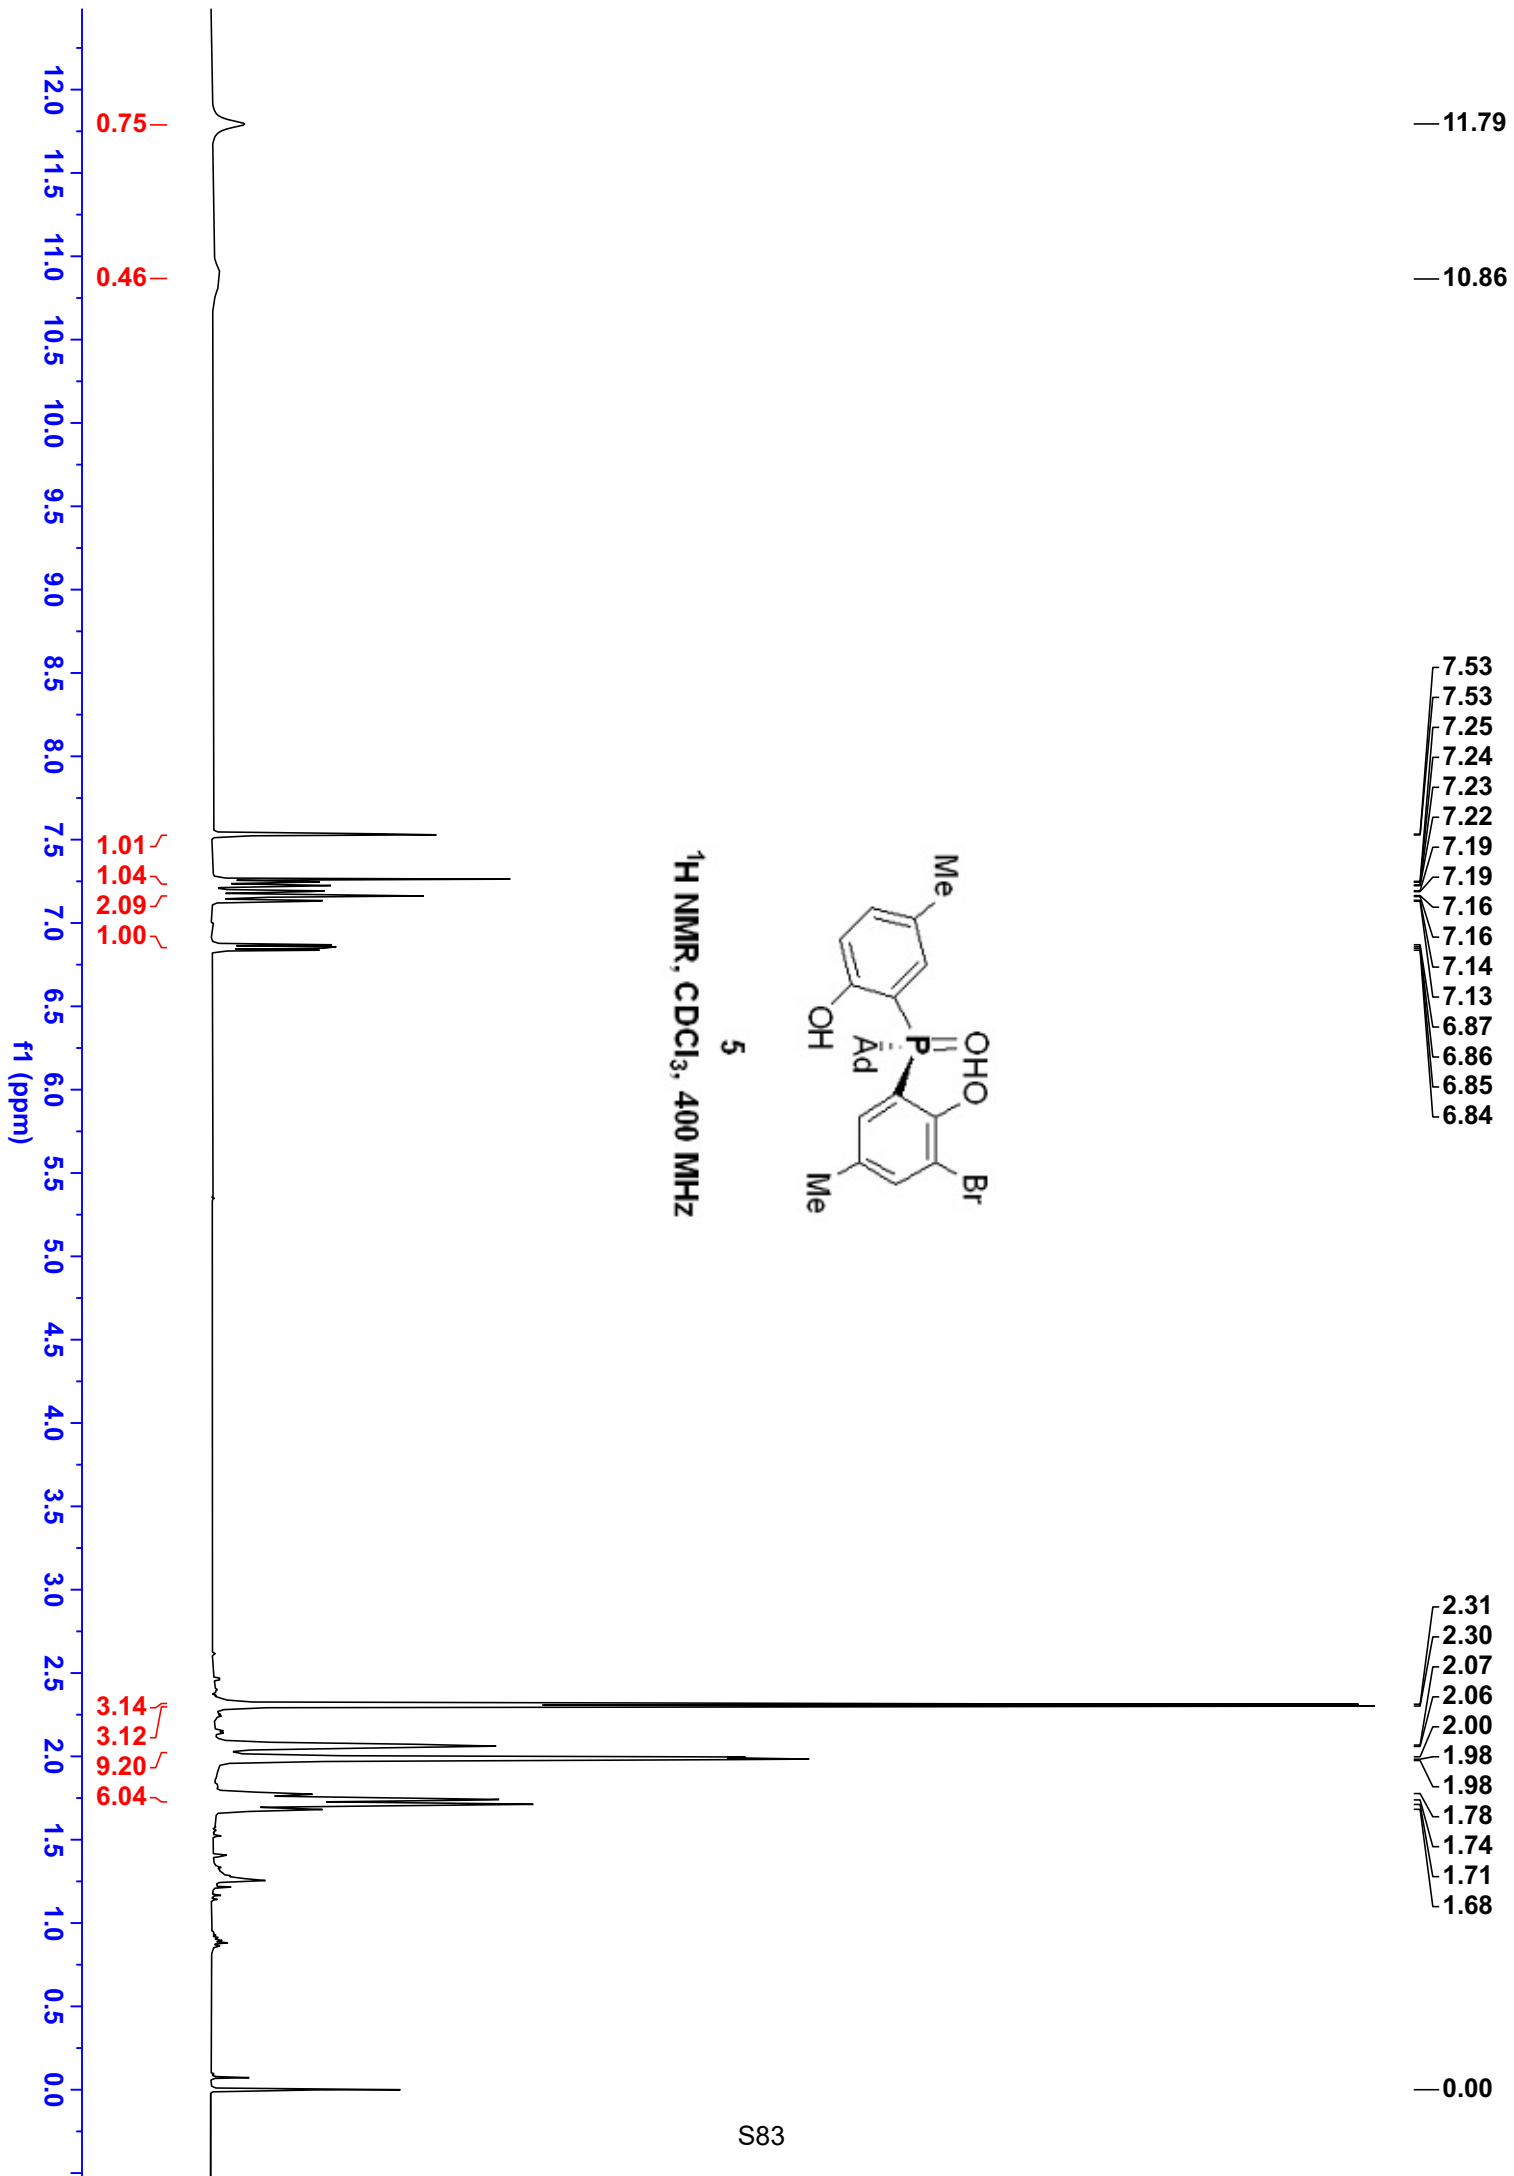

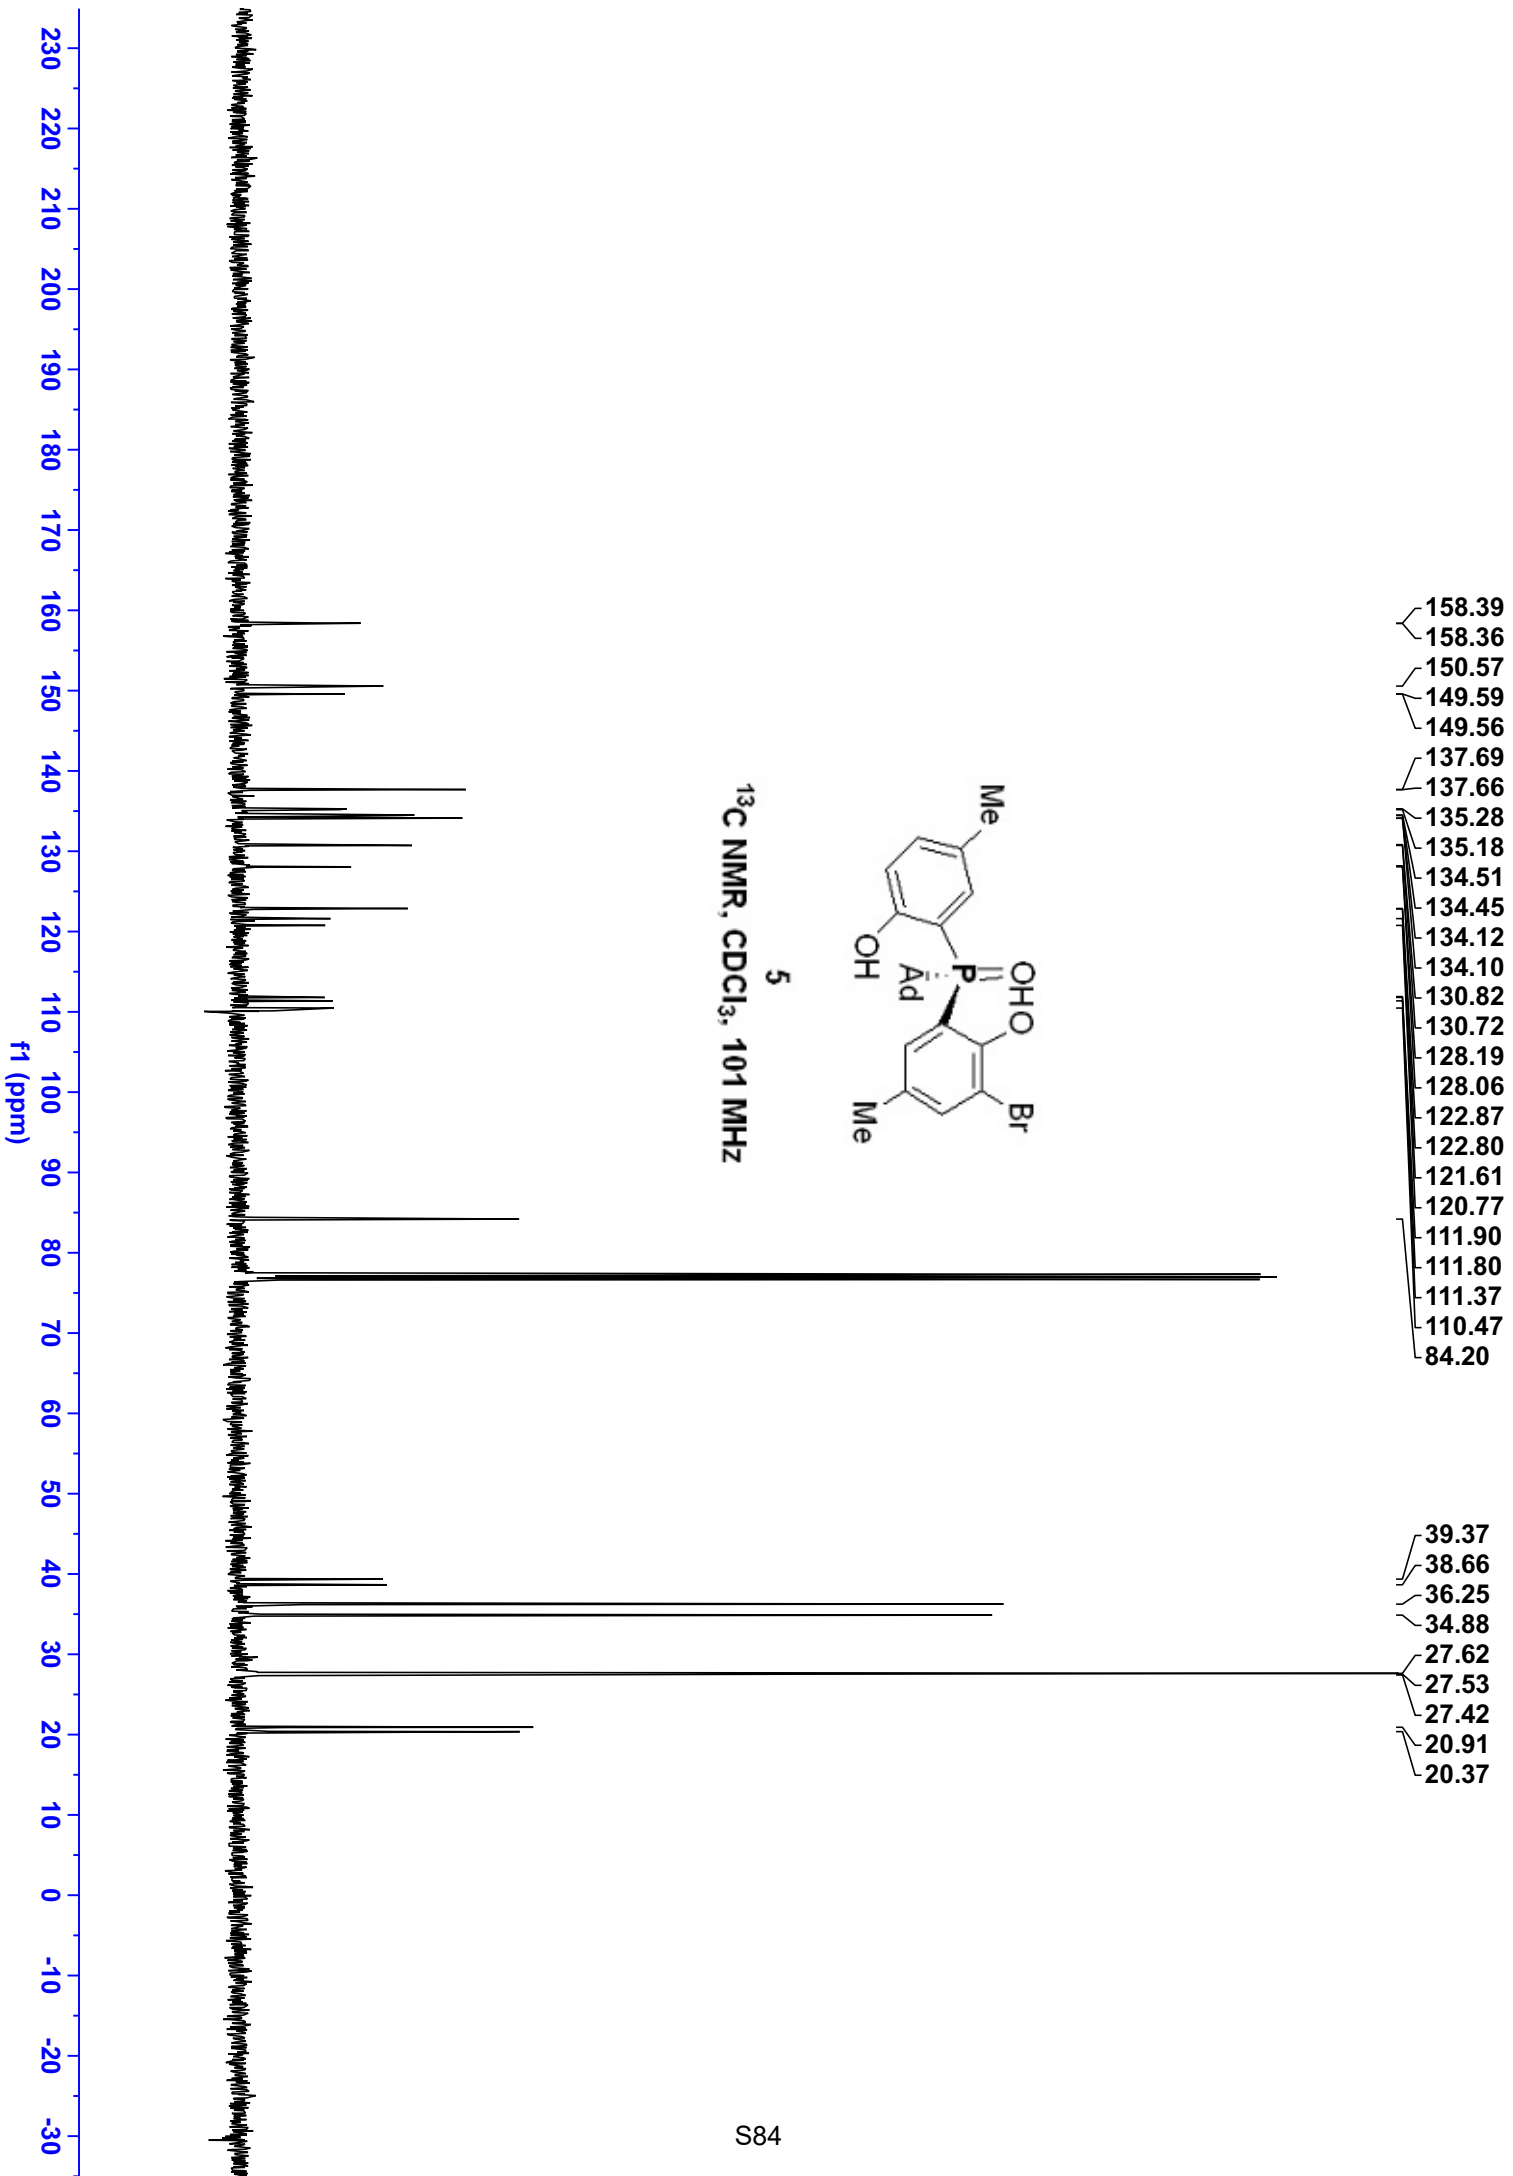

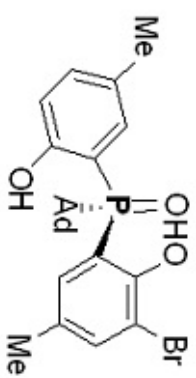

5  
<sup>31</sup>P NMR, CDCl<sub>3</sub>, 162 MHz



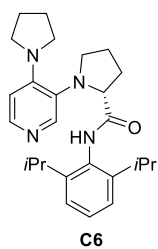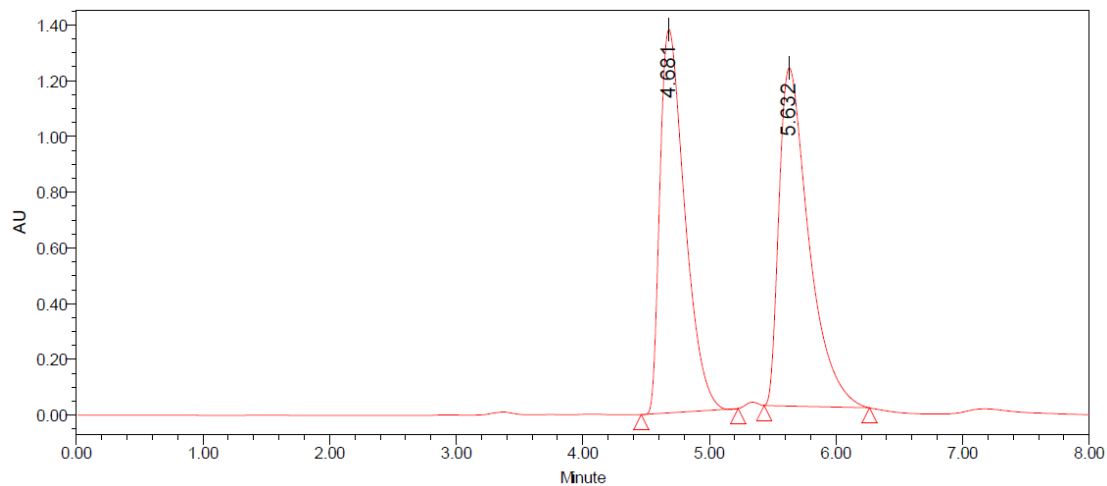

|   | RT (Min) | Area (μU*s) | % Area | Height (μU) | % Height | Start Time (Min) | End Time (Min) |
|---|----------|-------------|--------|-------------|----------|------------------|----------------|
| 1 | 4.681    | 18760001    | 48.60  | 1375426     | 53.13    | 4.462            | 5.227          |
| 2 | 5.632    | 19837301    | 51.40  | 1213189     | 46.87    | 5.433            | 6.265          |

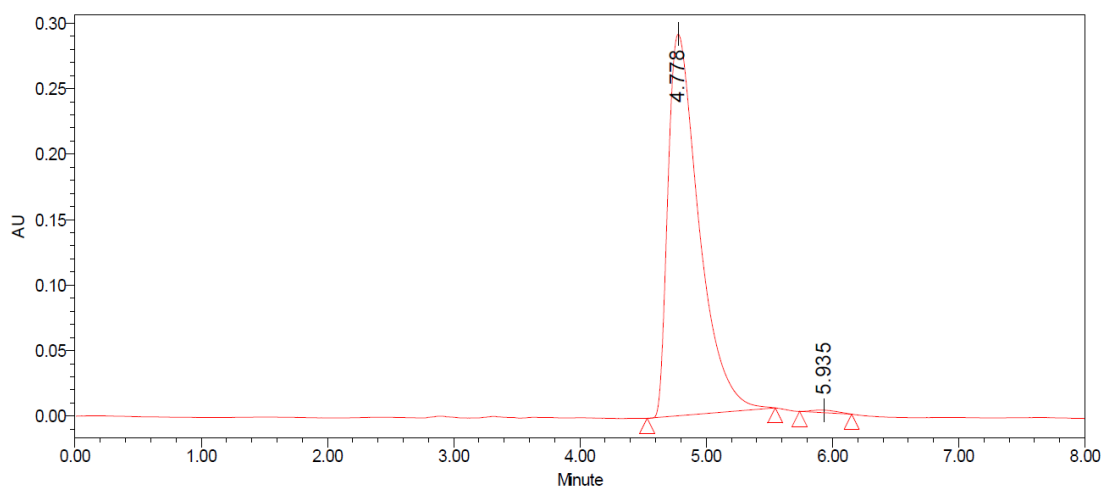

|   | RT (Min) | Area (μU*s) | % Area | Height (μU) | % Height | Start Time (Min) | End Time (Min) |
|---|----------|-------------|--------|-------------|----------|------------------|----------------|
| 1 | 4.778    | 4969410     | 99.46  | 291325      | 99.33    | 4.532            | 5.547          |
| 2 | 5.935    | 27182       | 0.54   | 1970        | 0.67     | 5.740            | 6.152          |

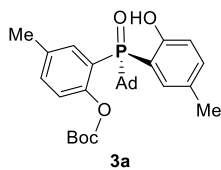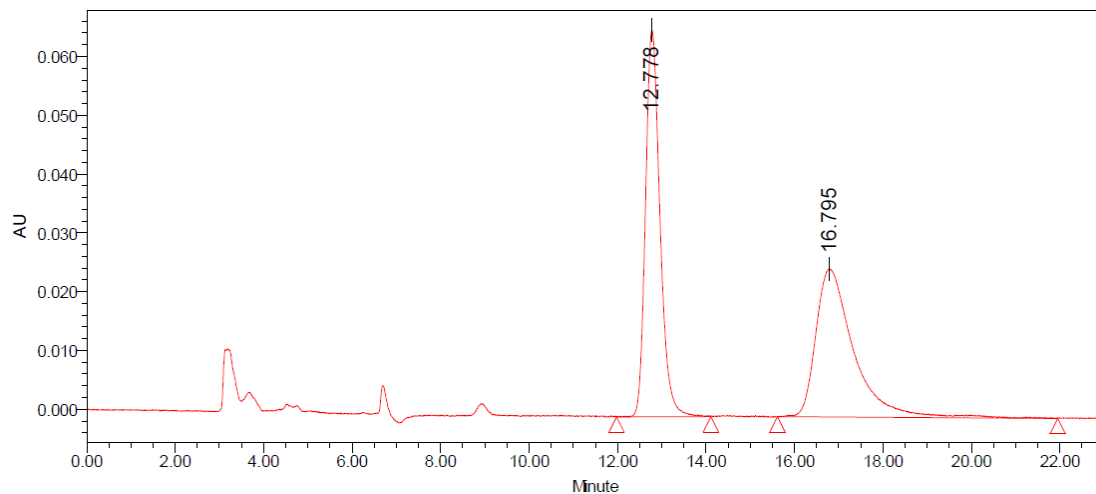

|   | RT (Min) | Area (μU*s) | % Area | Height (μU) | % Height | Start Time (Min) | End Time (Min) |
|---|----------|-------------|--------|-------------|----------|------------------|----------------|
| 1 | 12.778   | 1497499     | 49.93  | 65778       | 72.27    | 11.980           | 14.110         |
| 2 | 16.795   | 1501549     | 50.07  | 25235       | 27.73    | 15.617           | 21.953         |

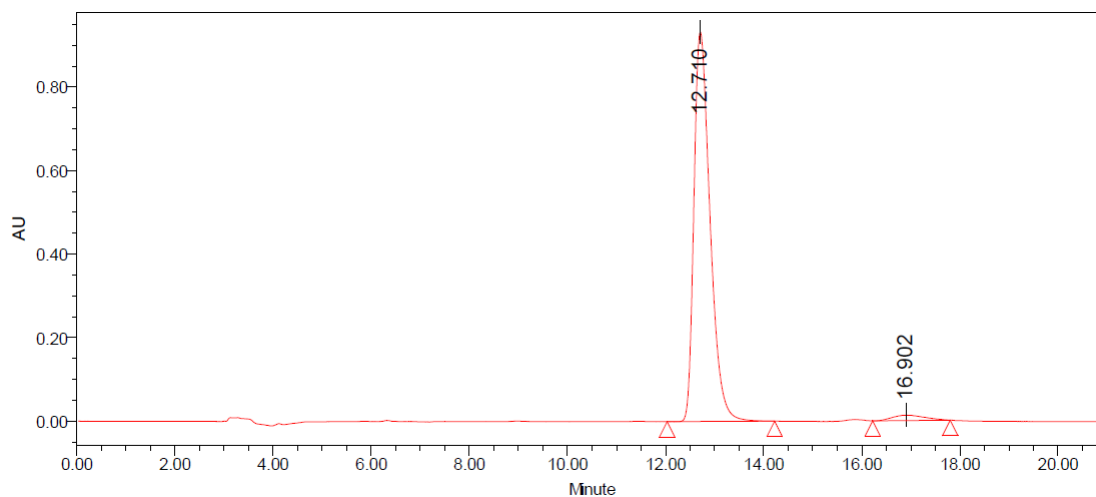

|   | RT (Min) | Area (μU*s) | % Area | Height (μU) | % Height | Start Time (Min) | End Time (Min) |
|---|----------|-------------|--------|-------------|----------|------------------|----------------|
| 1 | 12.710   | 21282204    | 97.31  | 932099      | 98.63    | 12.033           | 14.222         |
| 2 | 16.902   | 589405      | 2.69   | 12910       | 1.37     | 16.220           | 17.802         |

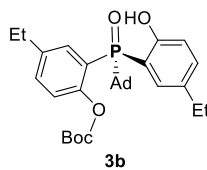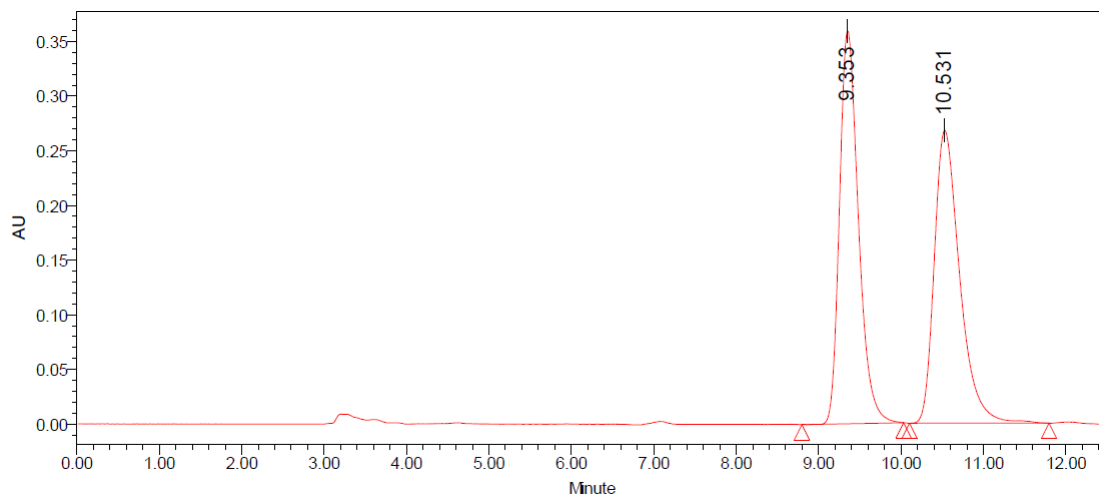

|   | RT (Min) | Area (μU*s) | % Area | Height (μU) | % Height | Start Time (Min) | End Time (Min) |
|---|----------|-------------|--------|-------------|----------|------------------|----------------|
| 1 | 9.353    | 5735916     | 49.95  | 359311      | 57.27    | 8.797            | 10.032         |
| 2 | 10.531   | 5748320     | 50.05  | 268059      | 42.73    | 10.103           | 11.795         |

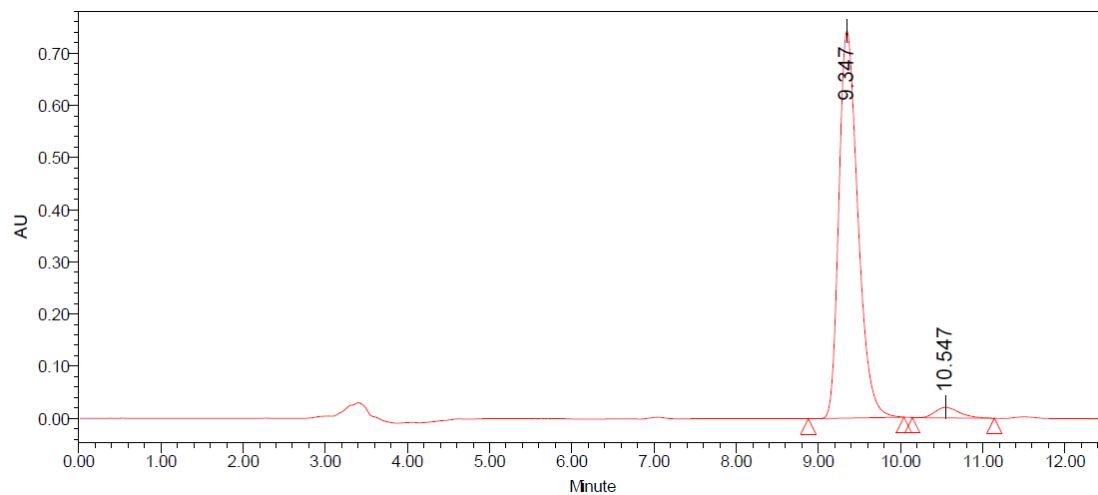

|   | RT (Min) | Area (μU*s) | % Area | Height (μU) | % Height | Start Time (Min) | End Time (Min) |
|---|----------|-------------|--------|-------------|----------|------------------|----------------|
| 1 | 9.347    | 11931953    | 96.59  | 742172      | 97.35    | 8.877            | 10.042         |
| 2 | 10.547   | 421031      | 3.41   | 20242       | 2.65     | 10.143           | 11.142         |

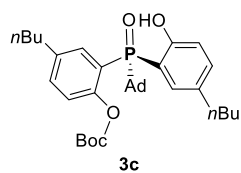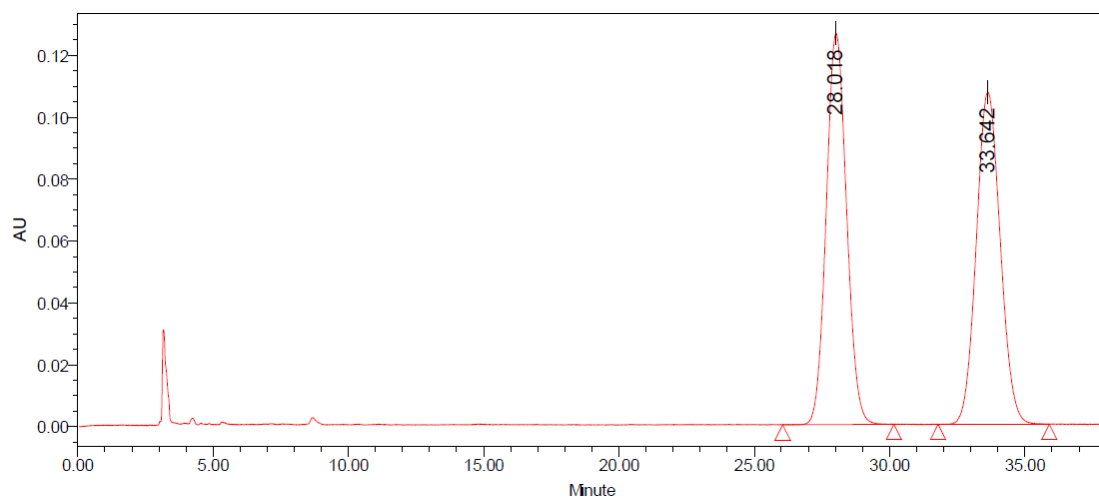

|   | RT (Min) | Area (μU*s) | % Area | Height (μU) | % Height | Start Time (Min) | End Time (Min) |
|---|----------|-------------|--------|-------------|----------|------------------|----------------|
| 1 | 28.018   | 6604617     | 50.00  | 126570      | 54.09    | 26.050           | 30.162         |
| 2 | 33.642   | 6605097     | 50.00  | 107426      | 45.91    | 31.792           | 35.902         |

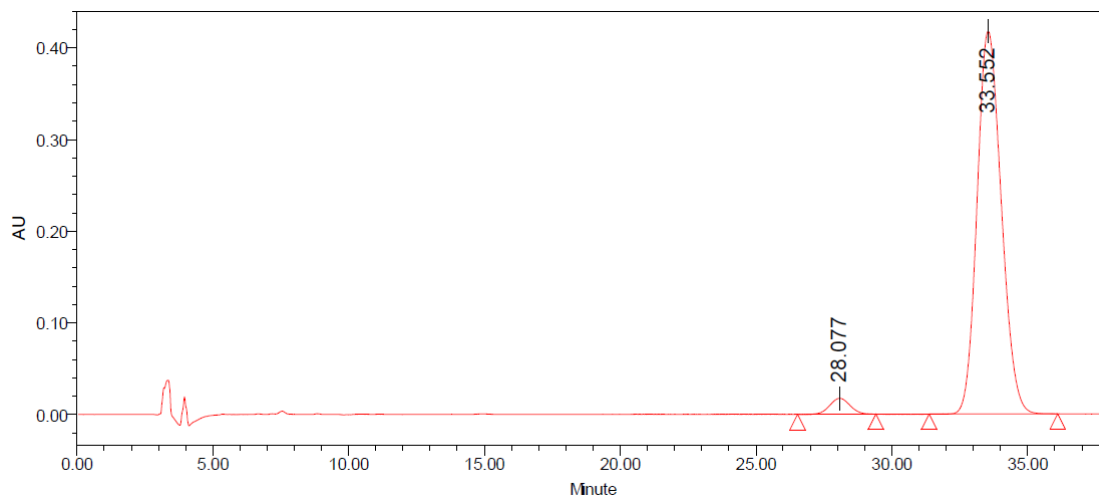

|   | RT (Min) | Area (μU*s) | % Area | Height (μU) | % Height | Start Time (Min) | End Time (Min) |
|---|----------|-------------|--------|-------------|----------|------------------|----------------|
| 1 | 28.077   | 888547      | 3.32   | 17365       | 3.99     | 26.532           | 29.413         |
| 2 | 33.552   | 25877947    | 96.68  | 417731      | 96.01    | 31.375           | 36.112         |

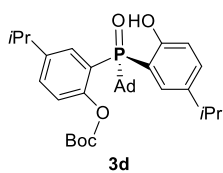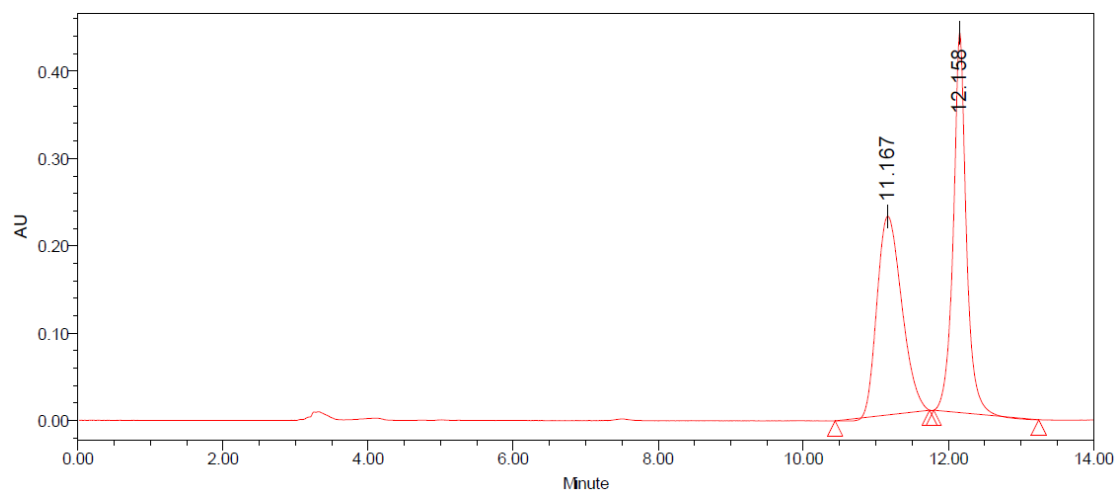

|   | RT (Min) | Area (μU*s) | % Area | Height (μU) | % Height | Start Time (Min) | End Time (Min) |
|---|----------|-------------|--------|-------------|----------|------------------|----------------|
| 1 | 11.167   | 5437712     | 49.90  | 227519      | 34.32    | 10.438           | 11.743         |
| 2 | 12.158   | 5460196     | 50.10  | 435374      | 65.68    | 11.798           | 13.247         |

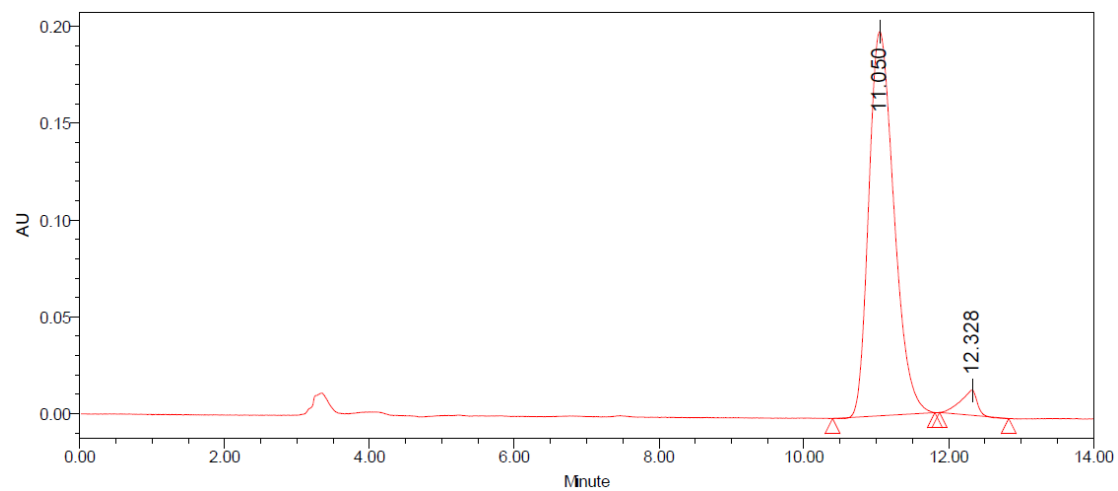

|   | RT (Min) | Area (μU*s) | % Area | Height (μU) | % Height | Start Time (Min) | End Time (Min) |
|---|----------|-------------|--------|-------------|----------|------------------|----------------|
| 1 | 11.050   | 4786457     | 95.76  | 198265      | 93.81    | 10.398           | 11.810         |
| 2 | 12.328   | 211817      | 4.24   | 13084       | 6.19     | 11.875           | 12.830         |

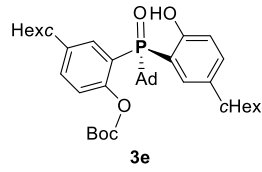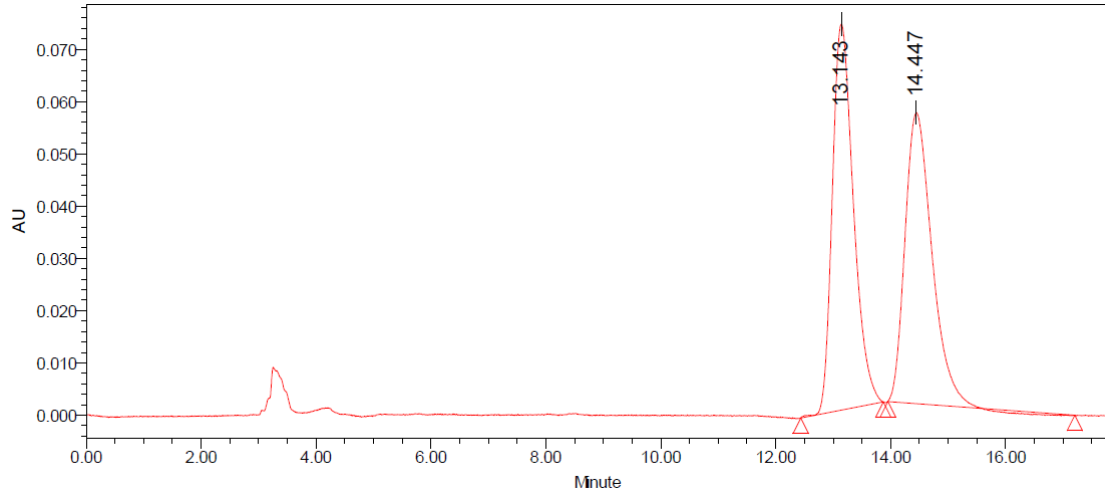

|   | RT (Min) | Area (μU*s) | % Area | Height (μU) | % Height | Start Time (Min) | End Time (Min) |
|---|----------|-------------|--------|-------------|----------|------------------|----------------|
| 1 | 13.143   | 1886936     | 50.42  | 73871       | 56.99    | 12.437           | 13.873         |
| 2 | 14.447   | 1855424     | 49.58  | 55747       | 43.01    | 13.952           | 17.205         |

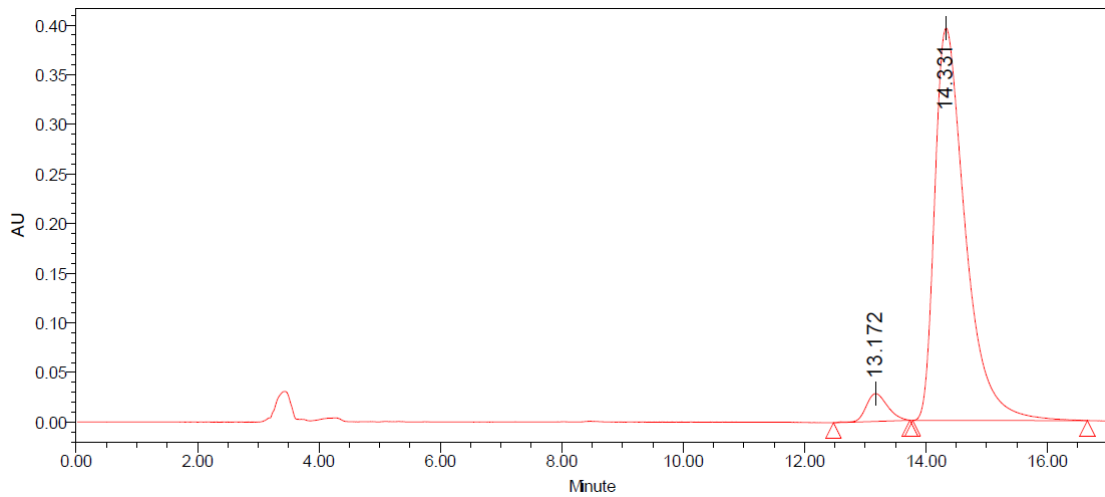

|   | RT (Min) | Area (μU*s) | % Area | Height (μU) | % Height | Start Time (Min) | End Time (Min) |
|---|----------|-------------|--------|-------------|----------|------------------|----------------|
| 1 | 13.172   | 679295      | 4.68   | 27974       | 6.61     | 12.477           | 13.738         |
| 2 | 14.331   | 13847914    | 95.32  | 395491      | 93.39    | 13.783           | 16.660         |

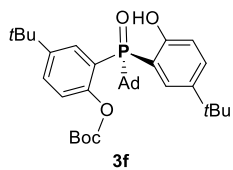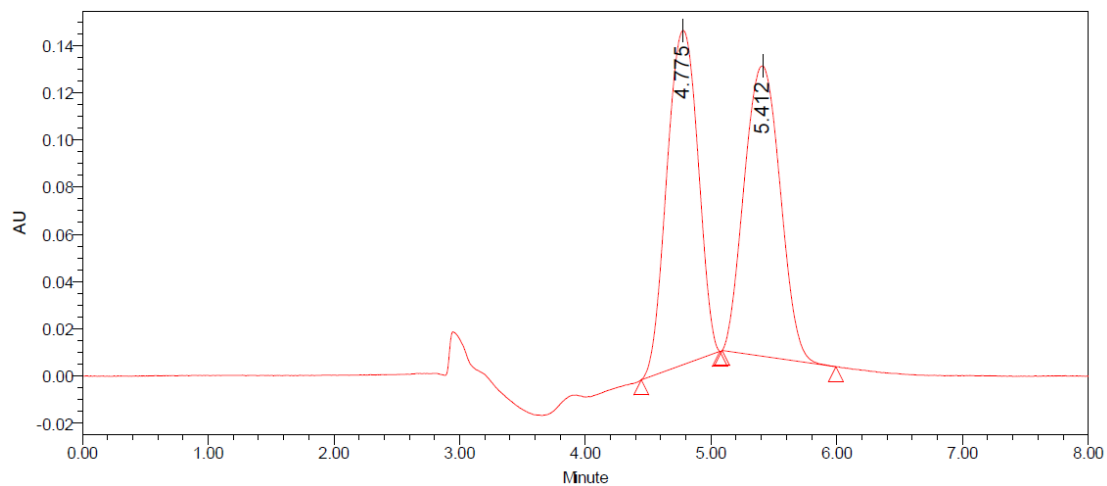

|   | RT (Min) | Area (μU*s) | % Area | Height (μU) | % Height | Start Time (Min) | End Time (Min) |
|---|----------|-------------|--------|-------------|----------|------------------|----------------|
| 1 | 4.775    | 2440120     | 49.95  | 141409      | 53.51    | 4.445            | 5.070          |
| 2 | 5.412    | 2445459     | 50.05  | 122874      | 46.49    | 5.088            | 5.993          |

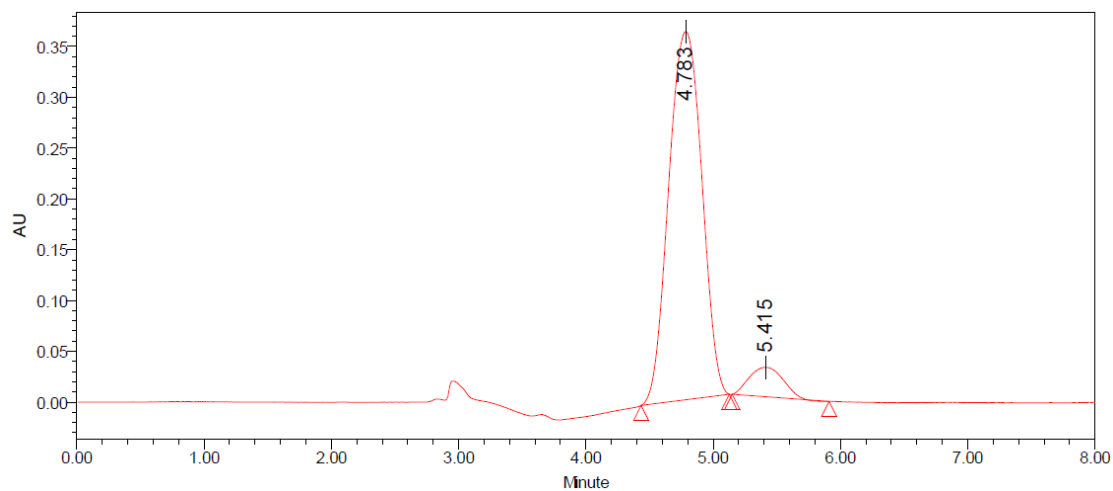

|   | RT (Min) | Area (μU*s) | % Area | Height (μU) | % Height | Start Time (Min) | End Time (Min) |
|---|----------|-------------|--------|-------------|----------|------------------|----------------|
| 1 | 4.783    | 6563315     | 92.35  | 362191      | 92.58    | 4.435            | 5.127          |
| 2 | 5.415    | 543974      | 7.65   | 29018       | 7.42     | 5.150            | 5.912          |

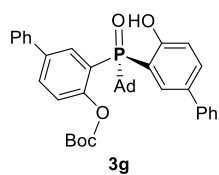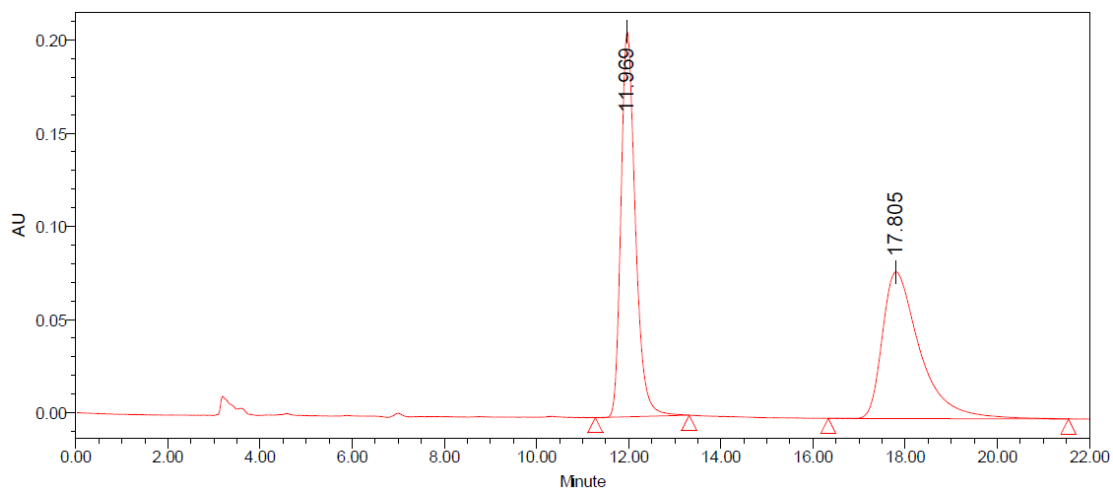

|   | RT (Min) | Area ( $\mu\text{U}^2\text{s}$ ) | % Area | Height ( $\mu\text{U}$ ) | % Height | Start Time (Min) | End Time (Min) |
|---|----------|----------------------------------|--------|--------------------------|----------|------------------|----------------|
| 1 | 11.969   | 4487338                          | 50.24  | 206708                   | 72.41    | 11.273           | 13.313         |
| 2 | 17.805   | 4444017                          | 49.76  | 78743                    | 27.59    | 16.333           | 21.545         |

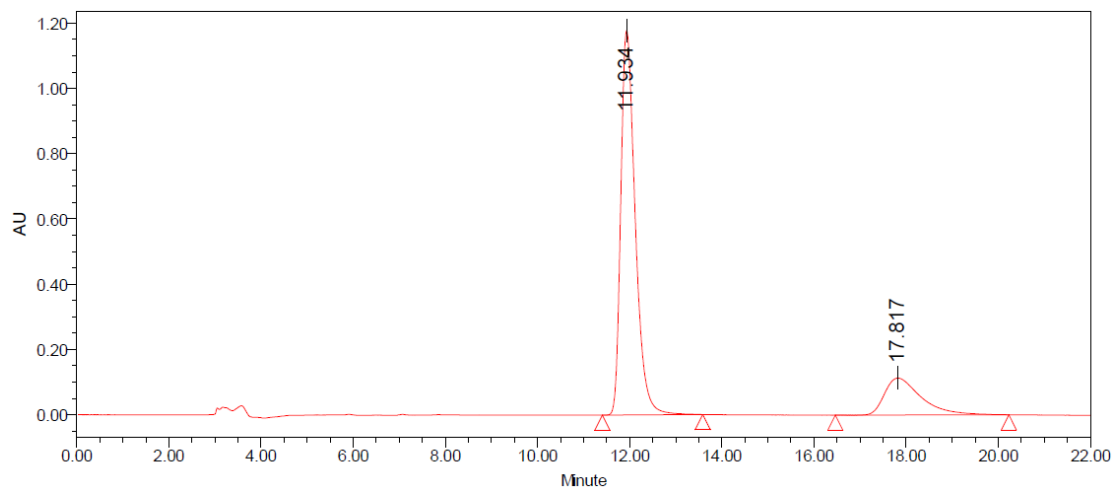

|   | RT (Min) | Area ( $\mu\text{U}^2\text{s}$ ) | % Area | Height ( $\mu\text{U}$ ) | % Height | Start Time (Min) | End Time (Min) |
|---|----------|----------------------------------|--------|--------------------------|----------|------------------|----------------|
| 1 | 11.934   | 25639772                         | 80.44  | 1177853                  | 91.23    | 11.407           | 13.585         |
| 2 | 17.817   | 6233025                          | 19.56  | 113195                   | 8.77     | 16.465           | 20.230         |

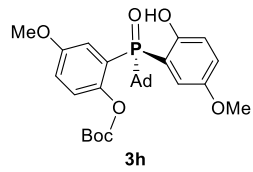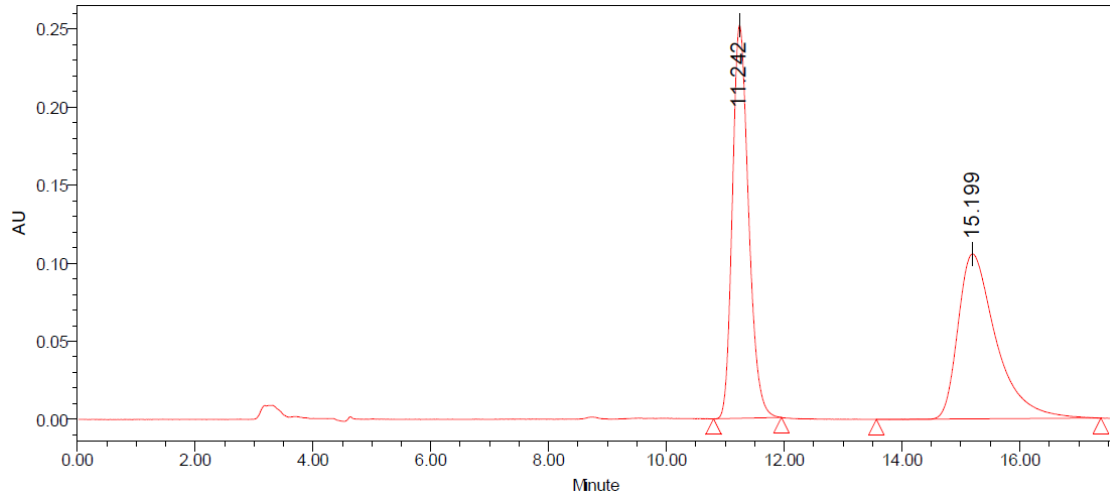

|   | RT (Min) | Area (μU*s) | % Area | Height (μU) | % Height | Start Time (Min) | End Time (Min) |
|---|----------|-------------|--------|-------------|----------|------------------|----------------|
| 1 | 11.242   | 4819973     | 50.39  | 251795      | 70.44    | 10.802           | 11.953         |
| 2 | 15.199   | 4745772     | 49.61  | 105681      | 29.56    | 13.565           | 17.378         |

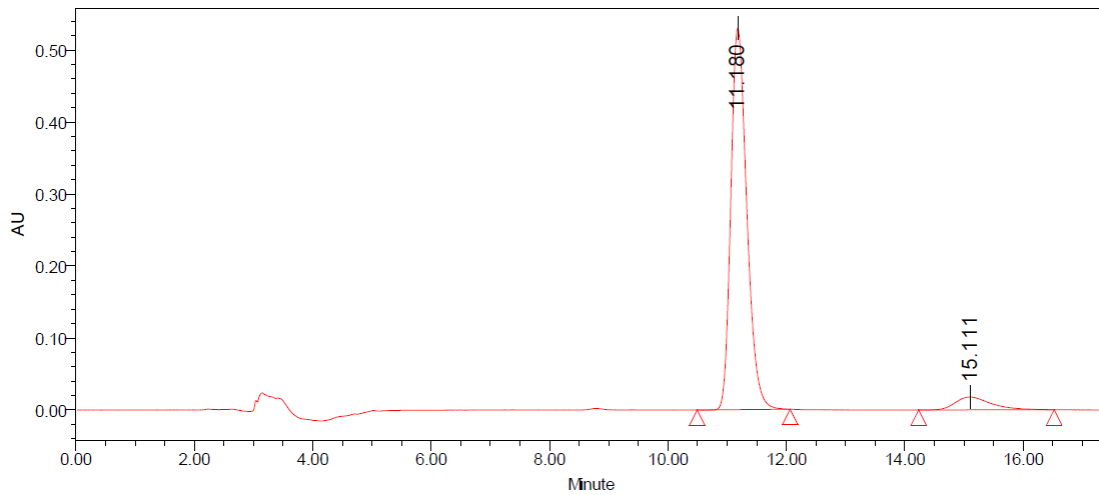

|   | RT (Min) | Area (μU*s) | % Area | Height (μU) | % Height | Start Time (Min) | End Time (Min) |
|---|----------|-------------|--------|-------------|----------|------------------|----------------|
| 1 | 11.180   | 9950293     | 93.01  | 530242      | 96.73    | 10.492           | 12.063         |
| 2 | 15.111   | 748317      | 6.99   | 17922       | 3.27     | 14.235           | 16.525         |

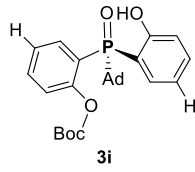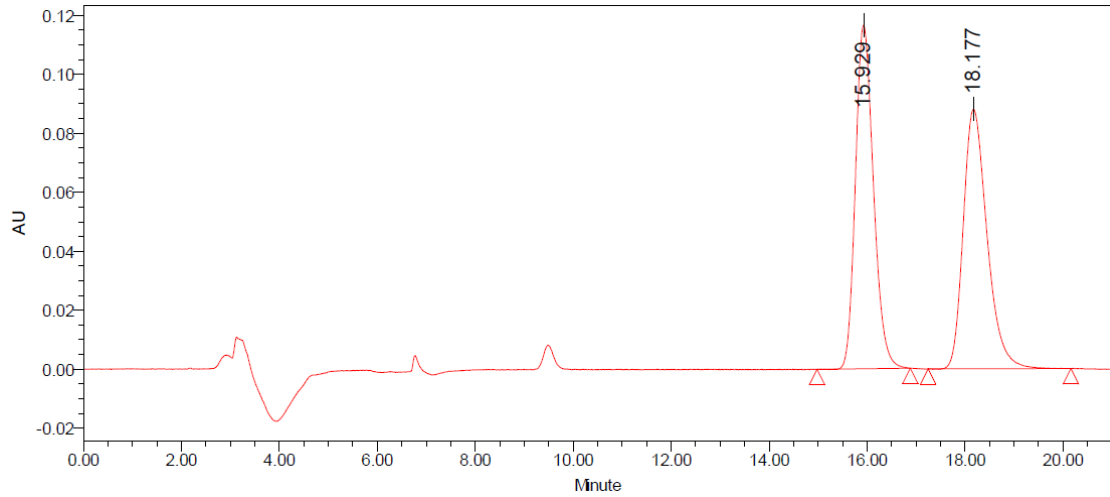

|   | RT (Min) | Area (μU*s) | % Area | Height (μU) | % Height | Start Time (Min) | End Time (Min) |
|---|----------|-------------|--------|-------------|----------|------------------|----------------|
| 1 | 15.929   | 2980617     | 50.12  | 116552      | 56.96    | 14.980           | 16.883         |
| 2 | 18.177   | 2965982     | 49.88  | 88055       | 43.04    | 17.247           | 20.160         |

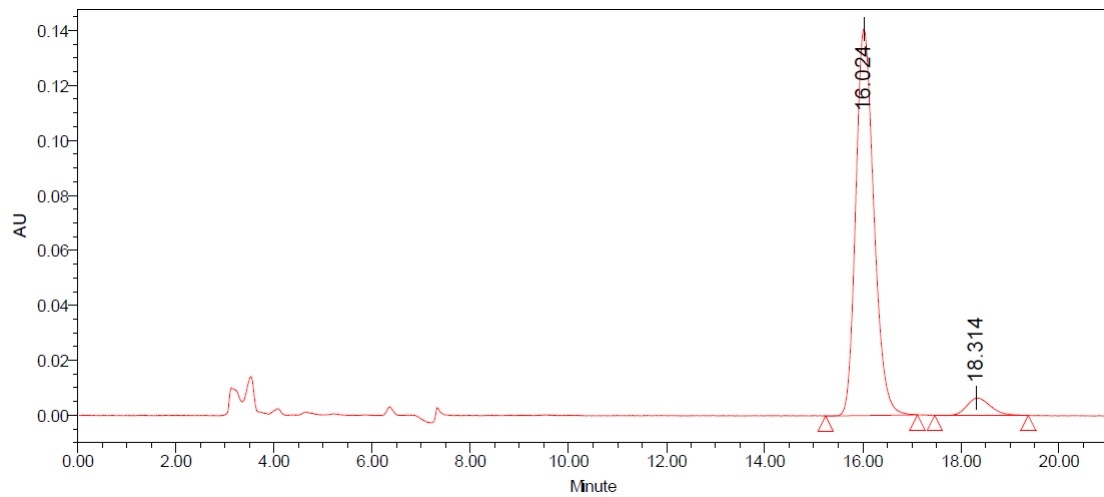

|   | RT (Min) | Area (μU*s) | % Area | Height (μU) | % Height | Start Time (Min) | End Time (Min) |
|---|----------|-------------|--------|-------------|----------|------------------|----------------|
| 1 | 16.024   | 3602026     | 94.51  | 140585      | 95.71    | 15.242           | 17.113         |
| 2 | 18.314   | 209380      | 5.49   | 6309        | 4.29     | 17.465           | 19.373         |

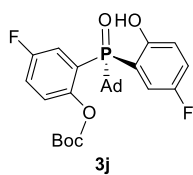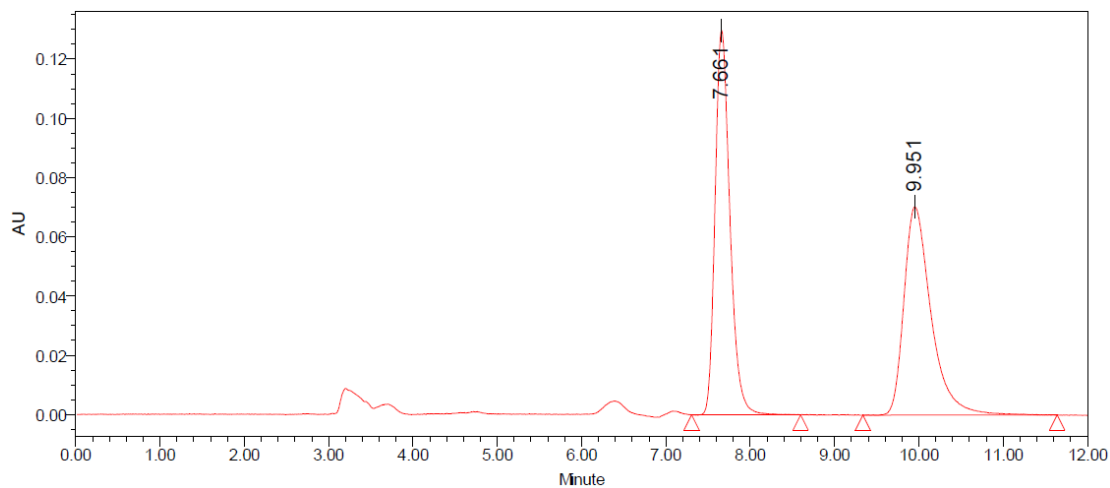

|   | RT (Min) | Area (μU*s) | % Area | Height (μU) | % Height | Start Time (Min) | End Time (Min) |
|---|----------|-------------|--------|-------------|----------|------------------|----------------|
| 1 | 7.661    | 1589412     | 50.24  | 129721      | 64.86    | 7.305            | 8.598          |
| 2 | 9.951    | 1574210     | 49.76  | 70282       | 35.14    | 9.335            | 11.640         |

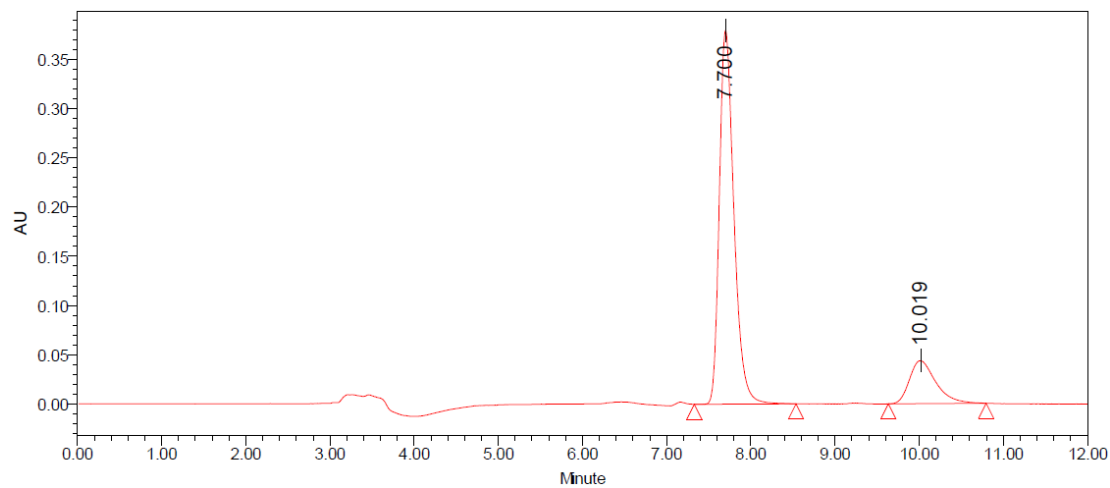

|   | RT (Min) | Area (μU*s) | % Area | Height (μU) | % Height | Start Time (Min) | End Time (Min) |
|---|----------|-------------|--------|-------------|----------|------------------|----------------|
| 1 | 7.700    | 4560832     | 82.74  | 379640      | 89.67    | 7.328            | 8.537          |
| 2 | 10.019   | 951377      | 17.26  | 43721       | 10.33    | 9.633            | 10.795         |

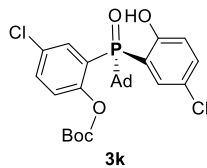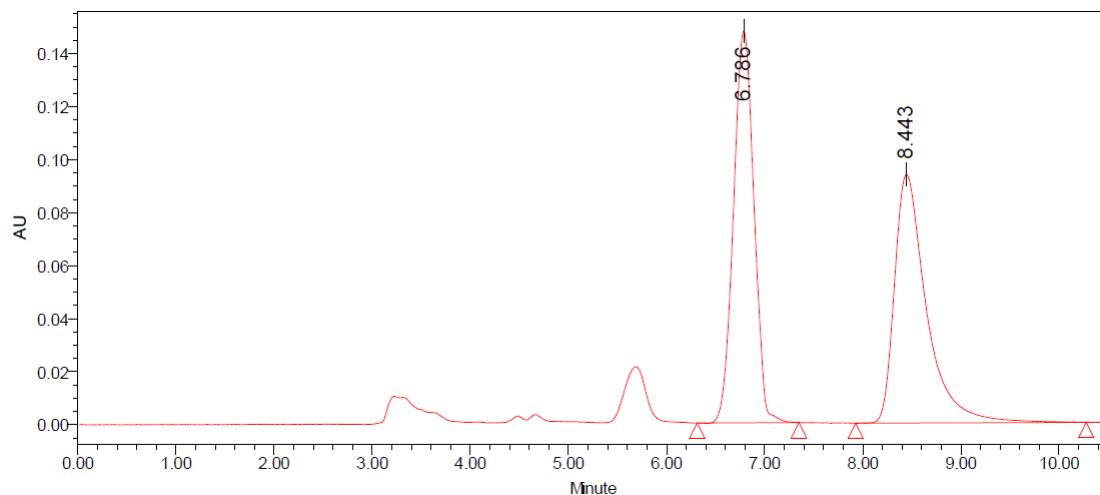

|   | RT (Min) | Area (μU*s) | % Area | Height (μU) | % Height | Start Time (Min) | End Time (Min) |
|---|----------|-------------|--------|-------------|----------|------------------|----------------|
| 1 | 6.786    | 2139101     | 50.21  | 147718      | 61.20    | 6.312            | 7.348          |
| 2 | 8.443    | 2120928     | 49.79  | 93669       | 38.80    | 7.927            | 10.278         |

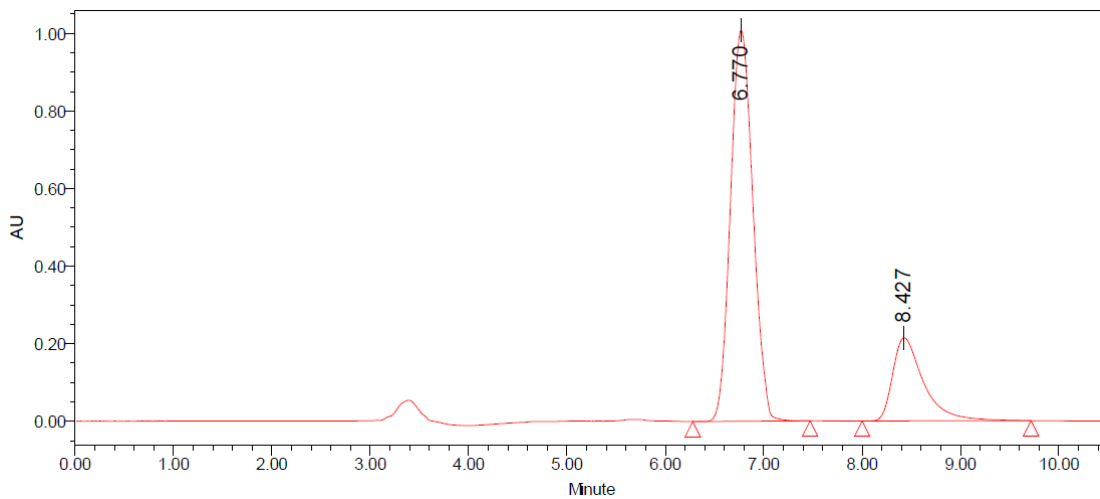

|   | RT (Min) | Area (μU*s) | % Area | Height (μU) | % Height | Start Time (Min) | End Time (Min) |
|---|----------|-------------|--------|-------------|----------|------------------|----------------|
| 1 | 6.770    | 15948972    | 77.41  | 1008373     | 82.50    | 6.278            | 7.472          |
| 2 | 8.427    | 4654068     | 22.59  | 213926      | 17.50    | 8.000            | 9.717          |

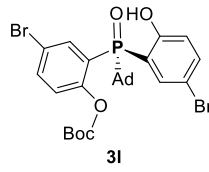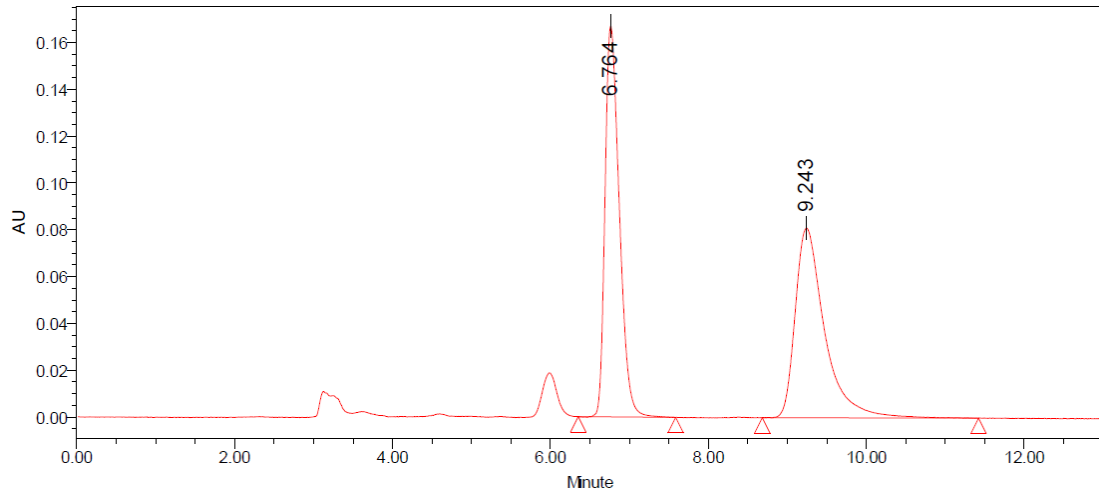

|   | RT (Min) | Area (μU*s) | % Area | Height (μU) | % Height | Start Time (Min) | End Time (Min) |
|---|----------|-------------|--------|-------------|----------|------------------|----------------|
| 1 | 6.764    | 2102838     | 50.11  | 166927      | 67.30    | 6.353            | 7.587          |
| 2 | 9.243    | 2093342     | 49.89  | 81104       | 32.70    | 8.683            | 11.423         |

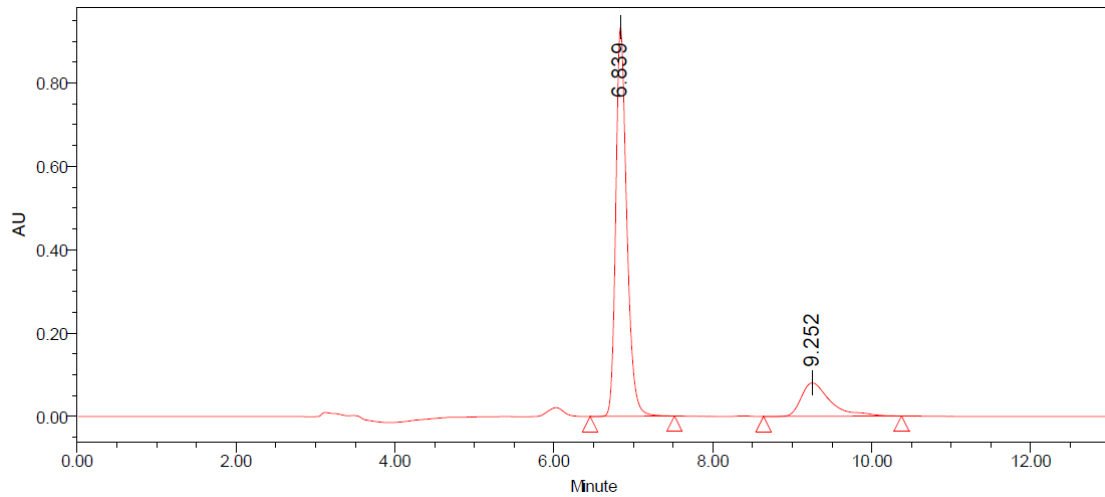

|   | RT (Min) | Area (μU*s) | % Area | Height (μU) | % Height | Start Time (Min) | End Time (Min) |
|---|----------|-------------|--------|-------------|----------|------------------|----------------|
| 1 | 6.839    | 8950385     | 81.46  | 933271      | 92.09    | 6.457            | 7.518          |
| 2 | 9.252    | 2037031     | 18.54  | 80158       | 7.91     | 8.640            | 10.377         |

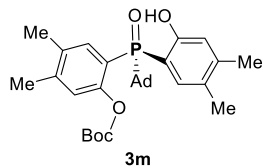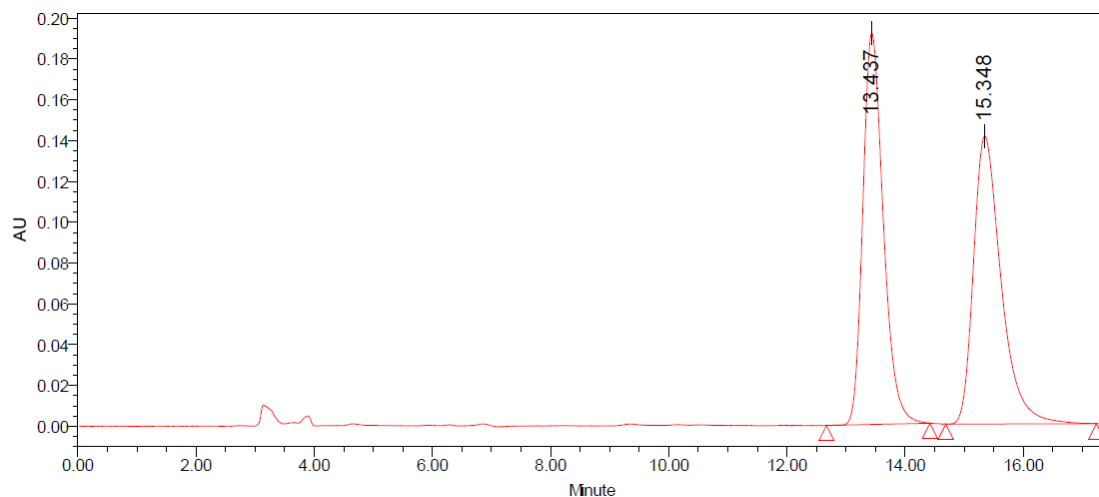

|   | RT (Min) | Area (μU*s) | % Area | Height (μU) | % Height | Start Time (Min) | End Time (Min) |
|---|----------|-------------|--------|-------------|----------|------------------|----------------|
| 1 | 13.437   | 4604423     | 50.09  | 191706      | 57.63    | 12.670           | 14.420         |
| 2 | 15.348   | 4587347     | 49.91  | 140954      | 42.37    | 14.687           | 17.238         |

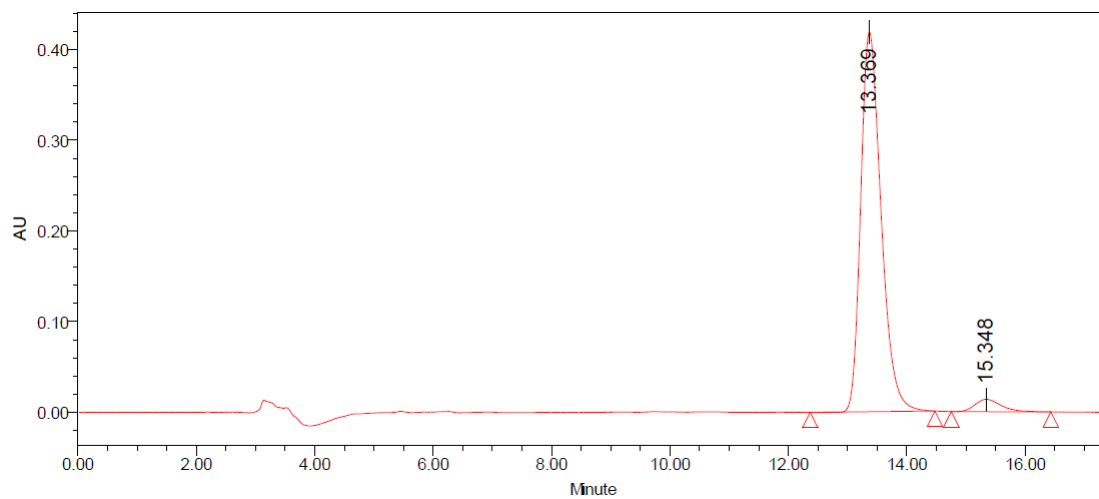

|   | RT (Min) | Area (μU*s) | % Area | Height (μU) | % Height | Start Time (Min) | End Time (Min) |
|---|----------|-------------|--------|-------------|----------|------------------|----------------|
| 1 | 13.369   | 9985400     | 95.97  | 418235      | 96.84    | 12.368           | 14.473         |
| 2 | 15.348   | 419530      | 4.03   | 13637       | 3.16     | 14.750           | 16.433         |

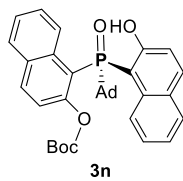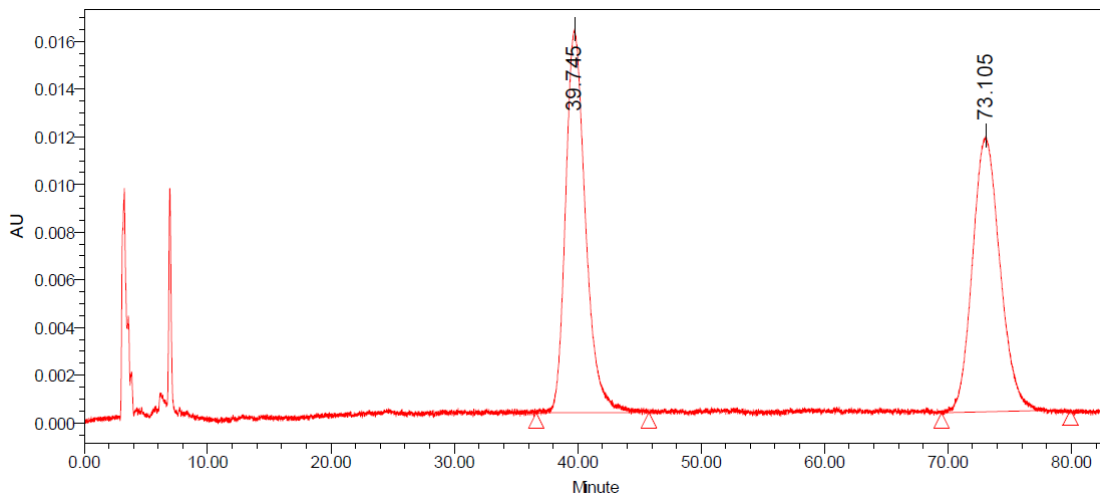

|   | RT (Min) | Area (μU*s) | % Area | Height (μU) | % Height | Start Time (Min) | End Time (Min) |
|---|----------|-------------|--------|-------------|----------|------------------|----------------|
| 1 | 39.745   | 1806487     | 50.17  | 16085       | 58.12    | 36.642           | 45.773         |
| 2 | 73.105   | 1794490     | 49.83  | 11589       | 41.88    | 69.485           | 79.935         |

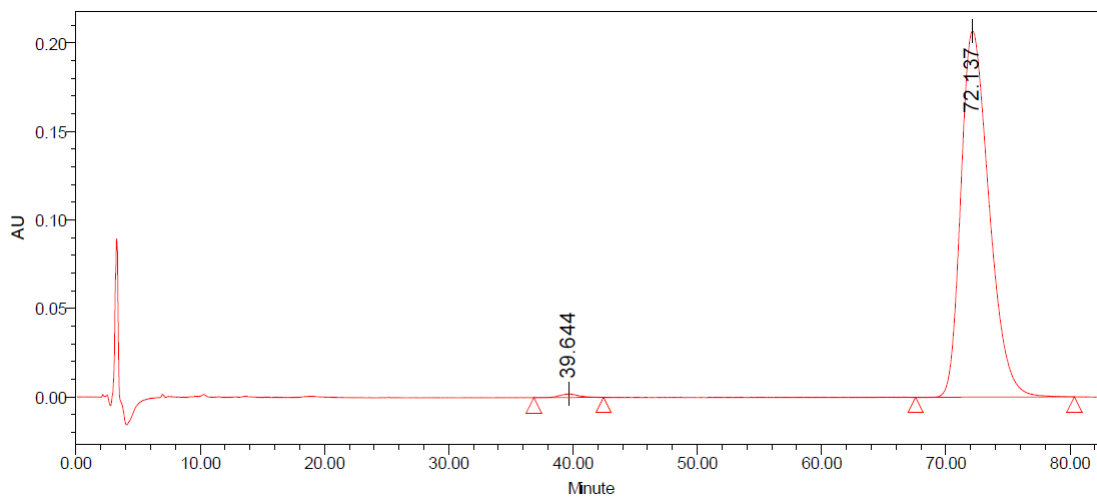

|   | RT (Min) | Area (μU*s) | % Area | Height (μU) | % Height | Start Time (Min) | End Time (Min) |
|---|----------|-------------|--------|-------------|----------|------------------|----------------|
| 1 | 39.644   | 212497      | 0.65   | 2026        | 0.97     | 36.852           | 42.455         |
| 2 | 72.137   | 32586411    | 99.35  | 206855      | 99.03    | 67.567           | 80.357         |

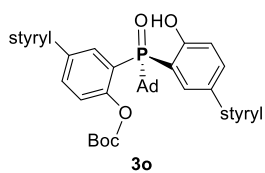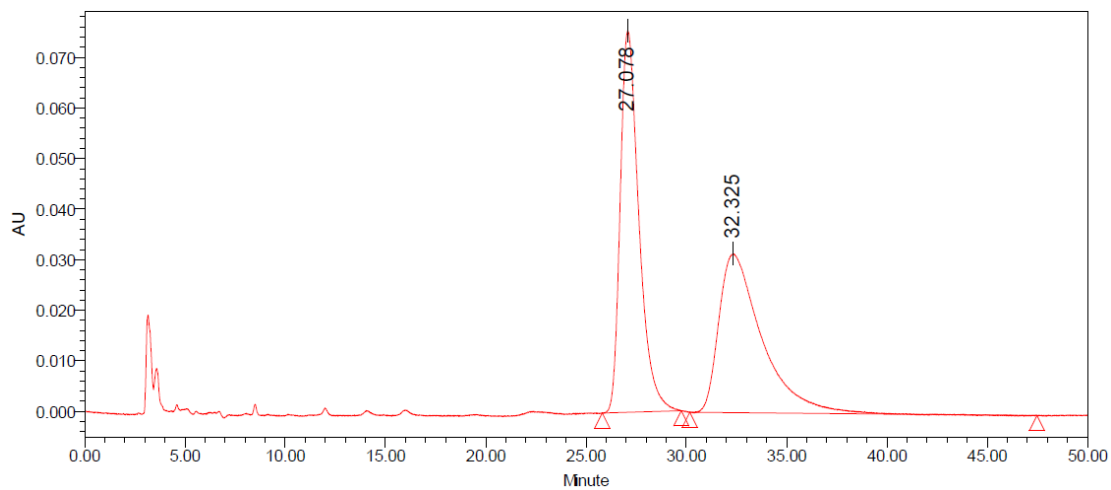

|   | RT (Min) | Area (μU*s) | % Area | Height (μU) | % Height | Start Time (Min) | End Time (Min) |
|---|----------|-------------|--------|-------------|----------|------------------|----------------|
| 1 | 27.078   | 4880759     | 50.93  | 75441       | 70.62    | 25.807           | 29.750         |
| 2 | 32.325   | 4702769     | 49.07  | 31389       | 29.38    | 30.168           | 47.485         |

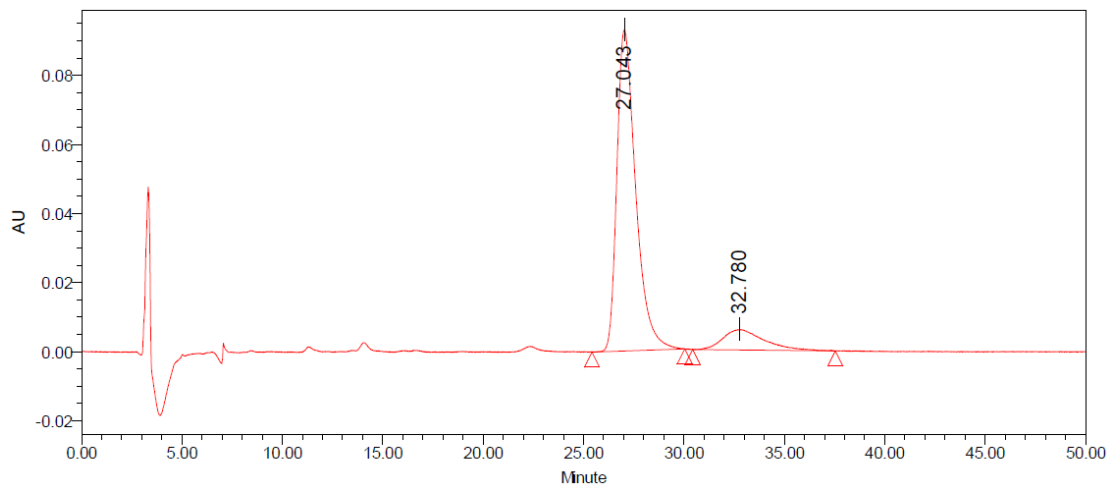

|   | RT (Min) | Area (μU*s) | % Area | Height (μU) | % Height | Start Time (Min) | End Time (Min) |
|---|----------|-------------|--------|-------------|----------|------------------|----------------|
| 1 | 27.043   | 6054217     | 87.77  | 93075       | 93.99    | 25.415           | 30.043         |
| 2 | 32.780   | 843265      | 12.23  | 5947        | 6.01     | 30.428           | 37.535         |

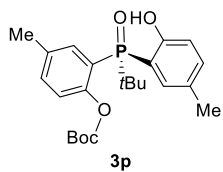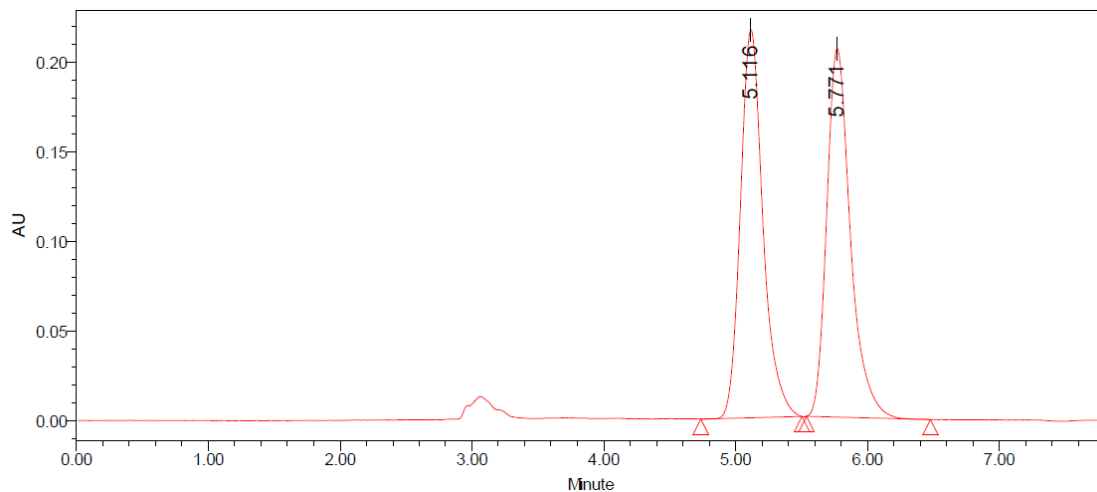

|   | RT (Min) | Area (μU*s) | % Area | Height (μU) | % Height | Start Time (Min) | End Time (Min) |
|---|----------|-------------|--------|-------------|----------|------------------|----------------|
| 1 | 5.116    | 2573643     | 50.00  | 216418      | 51.28    | 4.737            | 5.503          |
| 2 | 5.771    | 2573275     | 50.00  | 205616      | 48.72    | 5.538            | 6.478          |

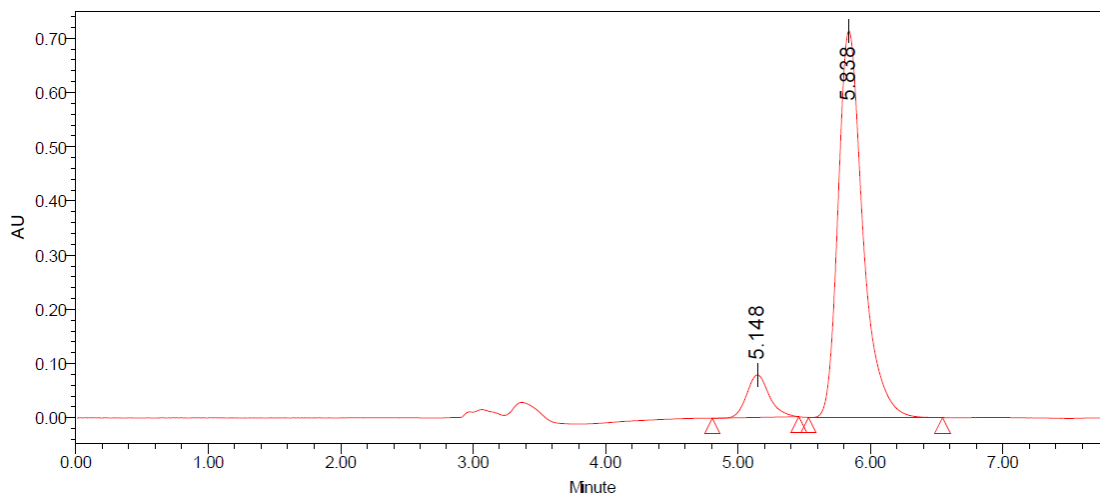

|   | RT (Min) | Area (μU*s) | % Area | Height (μU) | % Height | Start Time (Min) | End Time (Min) |
|---|----------|-------------|--------|-------------|----------|------------------|----------------|
| 1 | 5.148    | 928234      | 9.10   | 78384       | 9.90     | 4.807            | 5.460          |
| 2 | 5.838    | 9268779     | 90.90  | 713013      | 90.10    | 5.533            | 6.545          |

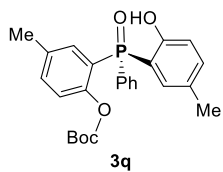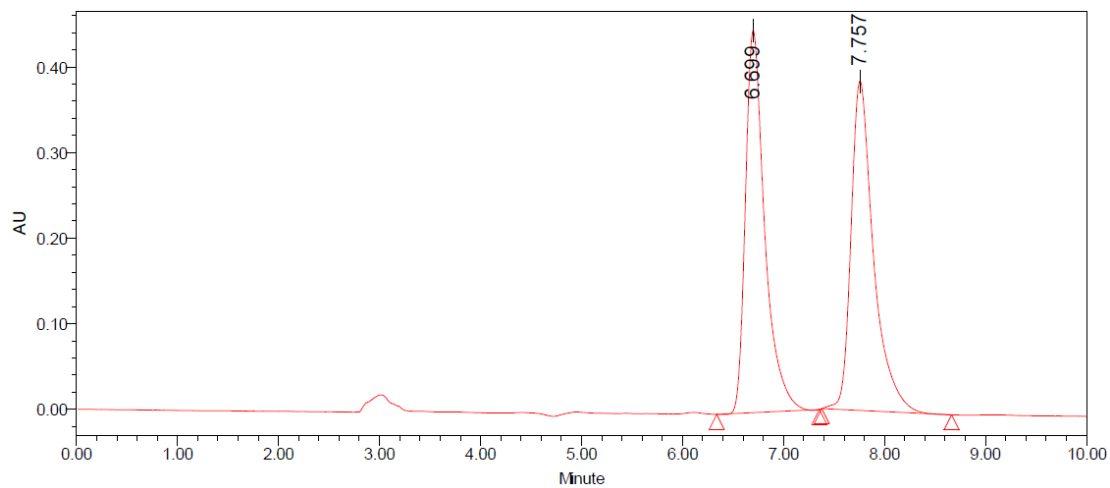

|   | RT (Min) | Area (μU*s) | % Area | Height (μU) | % Height | Start Time (Min) | End Time (Min) |
|---|----------|-------------|--------|-------------|----------|------------------|----------------|
| 1 | 6.699    | 5932139     | 49.82  | 446605      | 53.71    | 6.338            | 7.355          |
| 2 | 7.757    | 5973830     | 50.18  | 384965      | 46.29    | 7.378            | 8.665          |

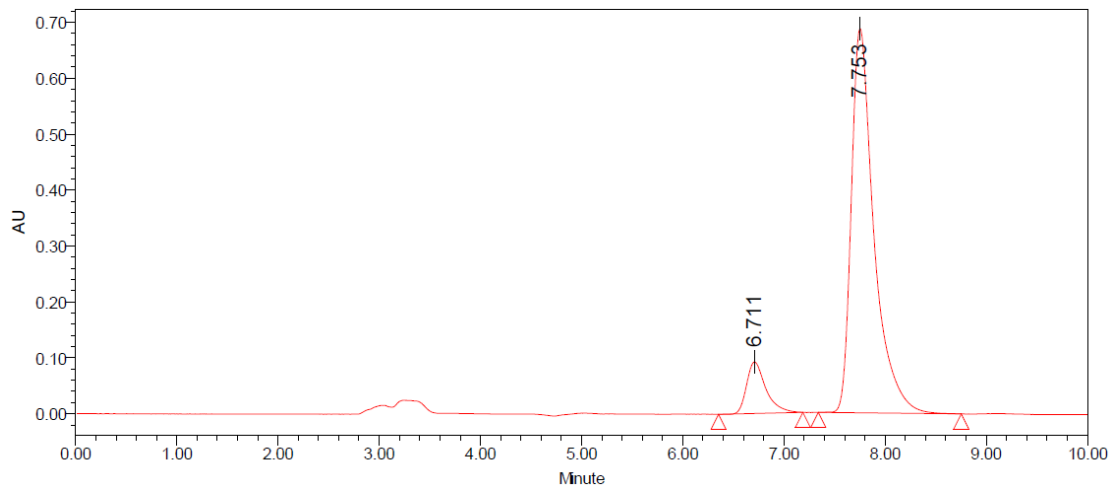

|   | RT (Min) | Area (μU*s) | % Area | Height (μU) | % Height | Start Time (Min) | End Time (Min) |
|---|----------|-------------|--------|-------------|----------|------------------|----------------|
| 1 | 6.711    | 1215175     | 10.22  | 92180       | 11.83    | 6.353            | 7.187          |
| 2 | 7.753    | 10673792    | 89.78  | 686966      | 88.17    | 7.340            | 8.753          |

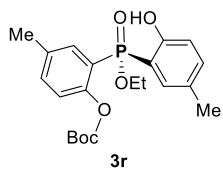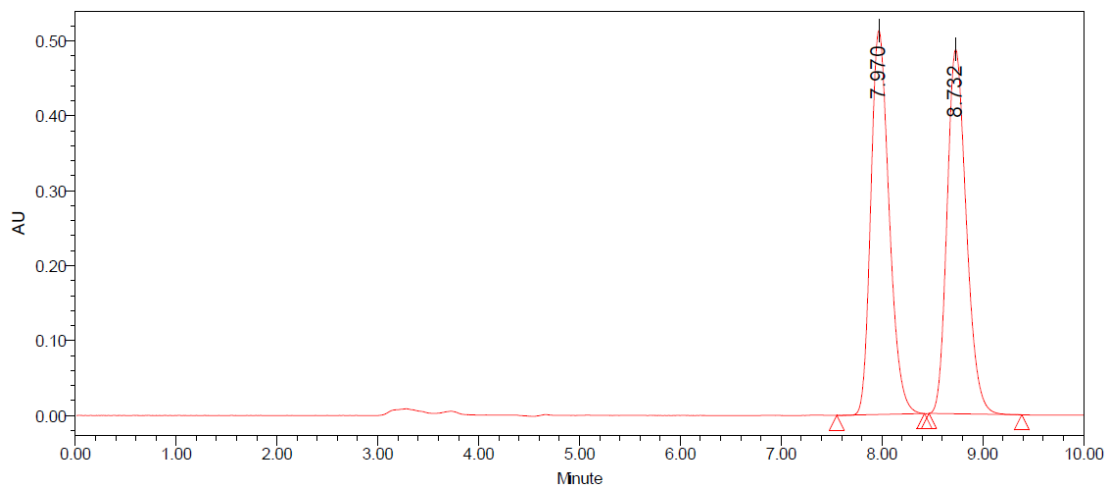

|   | RT (Min) | Area (μU*s) | % Area | Height (μU) | % Height | Start Time (Min) | End Time (Min) |
|---|----------|-------------|--------|-------------|----------|------------------|----------------|
| 1 | 7.970    | 6491110     | 50.15  | 512392      | 51.32    | 7.552            | 8.422          |
| 2 | 8.732    | 6452901     | 49.85  | 486128      | 48.68    | 8.467            | 9.387          |

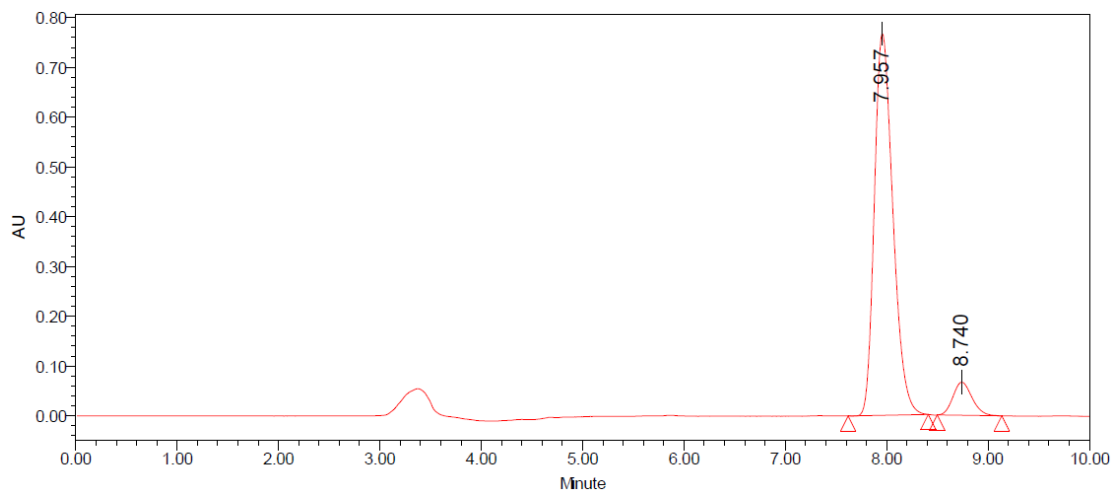

|   | RT (Min) | Area (μU*s) | % Area | Height (μU) | % Height | Start Time (Min) | End Time (Min) |
|---|----------|-------------|--------|-------------|----------|------------------|----------------|
| 1 | 7.957    | 9752833     | 91.82  | 766818      | 92.01    | 7.620            | 8.410          |
| 2 | 8.740    | 868927      | 8.18   | 66587       | 7.99     | 8.498            | 9.135          |

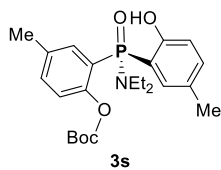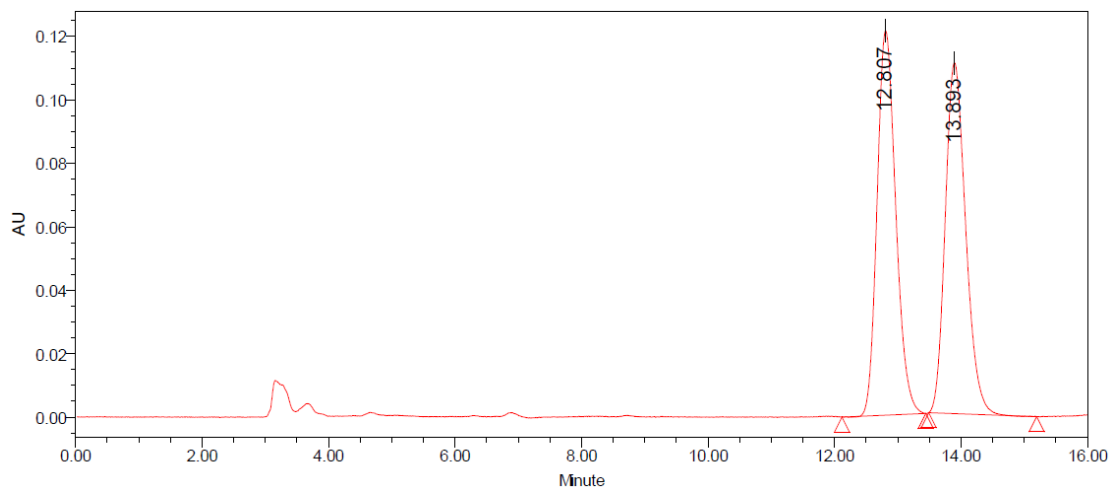

|   | RT (Min) | Area (μU*s) | % Area | Height (μU) | % Height | Start Time (Min) | End Time (Min) |
|---|----------|-------------|--------|-------------|----------|------------------|----------------|
| 1 | 12.807   | 2486994     | 50.06  | 121185      | 52.29    | 12.117           | 13.445         |
| 2 | 13.893   | 2480639     | 49.94  | 110563      | 47.71    | 13.490           | 15.197         |

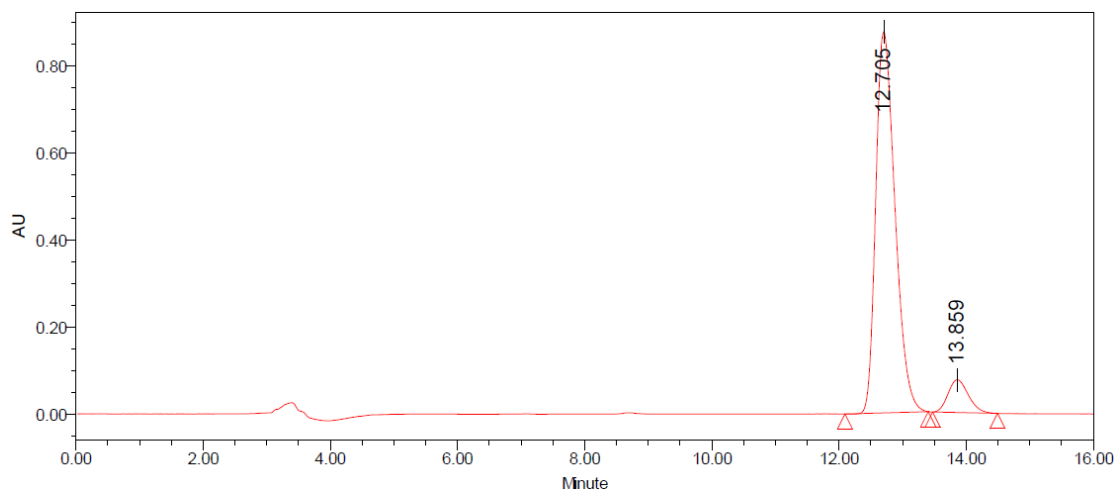

|   | RT (Min) | Area (μU*s) | % Area | Height (μU) | % Height | Start Time (Min) | End Time (Min) |
|---|----------|-------------|--------|-------------|----------|------------------|----------------|
| 1 | 12.705   | 18394932    | 91.67  | 875776      | 92.08    | 12.093           | 13.403         |
| 2 | 13.859   | 1671271     | 8.33   | 75337       | 7.92     | 13.473           | 14.493         |

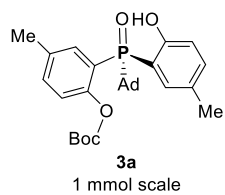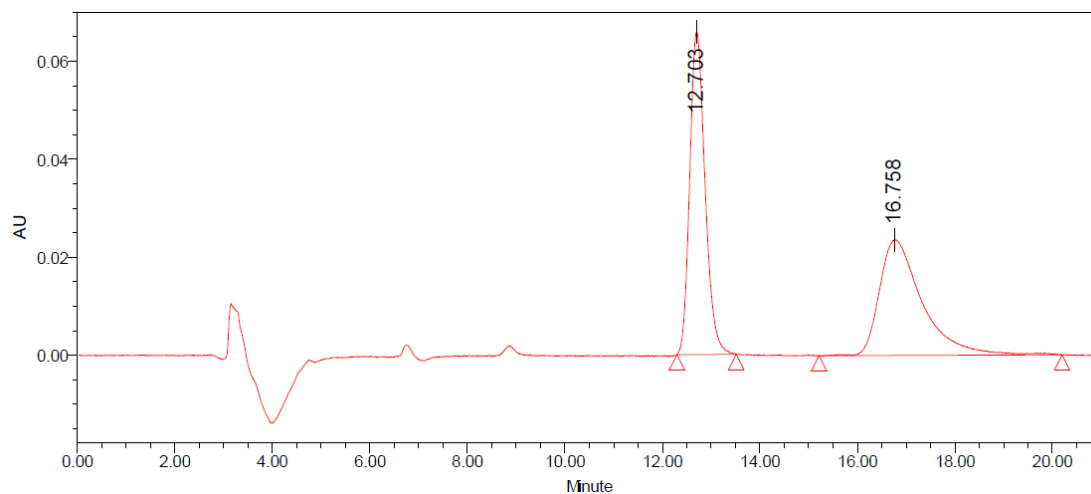

|   | RT (Min) | Area (μU*s) | % Area | Height (μU) | % Height | Start Time (Min) | End Time (Min) |
|---|----------|-------------|--------|-------------|----------|------------------|----------------|
| 1 | 12.703   | 1438049     | 50.01  | 65810       | 73.61    | 12.298           | 13.515         |
| 2 | 16.758   | 1437504     | 49.99  | 23591       | 26.39    | 15.213           | 20.202         |

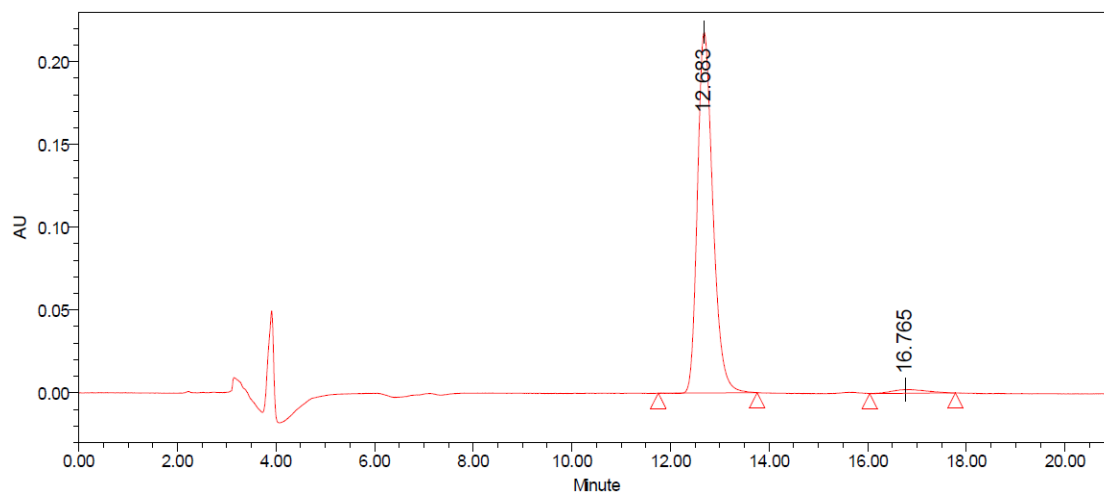

|   | RT (Min) | Area (μU*s) | % Area | Height (μU) | % Height | Start Time (Min) | End Time (Min) |
|---|----------|-------------|--------|-------------|----------|------------------|----------------|
| 1 | 12.683   | 4728019     | 97.68  | 217902      | 98.94    | 11.753           | 13.758         |
| 2 | 16.765   | 112445      | 2.32   | 2331        | 1.06     | 16.040           | 17.778         |

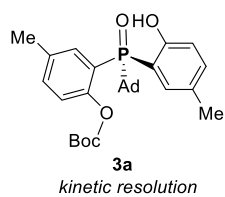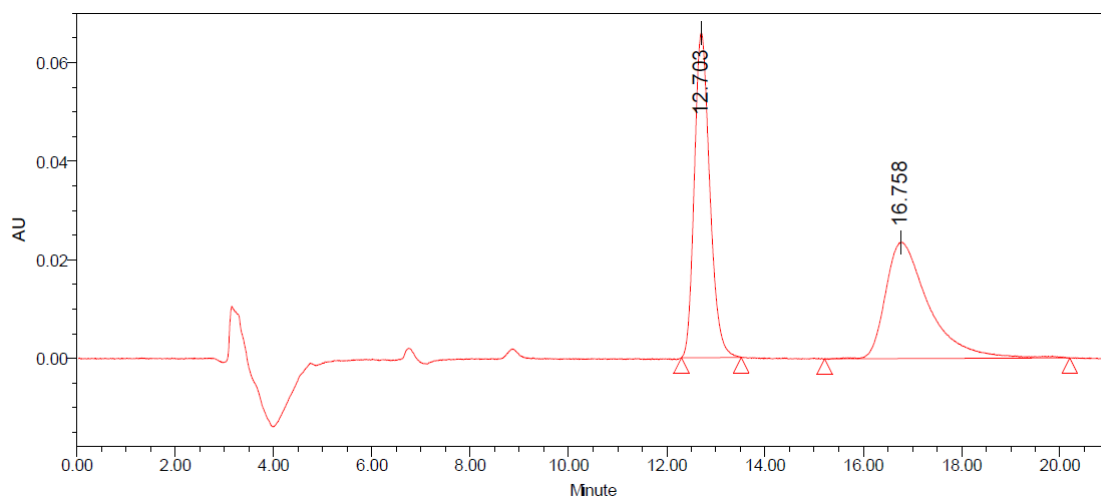

|   | RT (Min) | Area ( $\mu\text{U}^*\text{s}$ ) | % Area | Height ( $\mu\text{U}$ ) | % Height | Start Time (Min) | End Time (Min) |
|---|----------|----------------------------------|--------|--------------------------|----------|------------------|----------------|
| 1 | 12.703   | 1438049                          | 50.01  | 65810                    | 73.61    | 12.298           | 13.515         |
| 2 | 16.758   | 1437504                          | 49.99  | 23591                    | 26.39    | 15.213           | 20.202         |

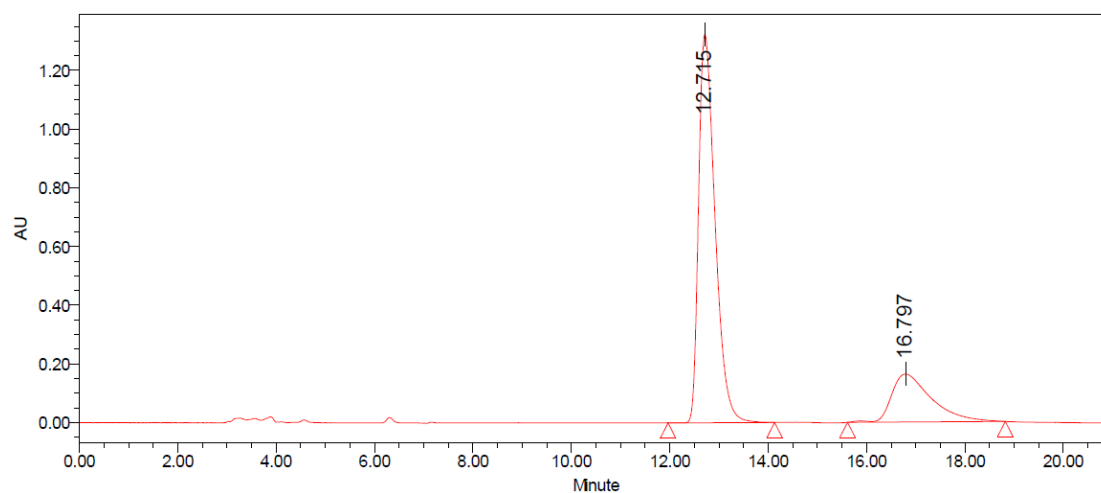

|   | RT (Min) | Area ( $\mu\text{U}^*\text{s}$ ) | % Area | Height ( $\mu\text{U}$ ) | % Height | Start Time (Min) | End Time (Min) |
|---|----------|----------------------------------|--------|--------------------------|----------|------------------|----------------|
| 1 | 12.715   | 30730501                         | 77.05  | 1324131                  | 89.01    | 11.965           | 14.130         |
| 2 | 16.797   | 9155017                          | 22.95  | 163496                   | 10.99    | 15.615           | 18.822         |

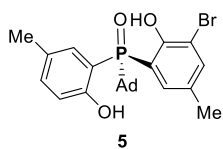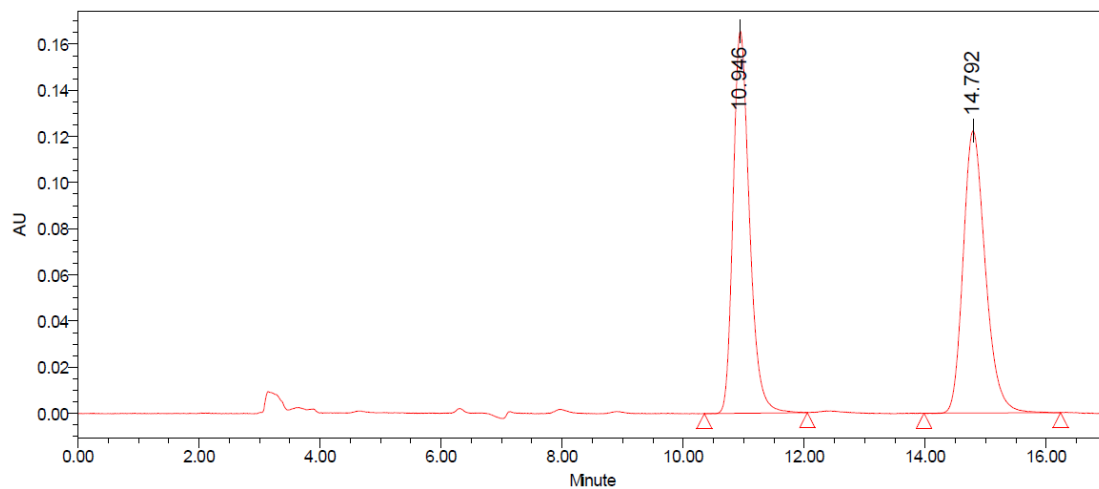

|   | RT (Min) | Area (μU*s) | % Area | Height (μU) | % Height | Start Time (Min) | End Time (Min) |
|---|----------|-------------|--------|-------------|----------|------------------|----------------|
| 1 | 10.946   | 3114361     | 49.98  | 165724      | 57.51    | 10.350           | 12.052         |
| 2 | 14.792   | 3116491     | 50.02  | 122421      | 42.49    | 13.982           | 16.238         |

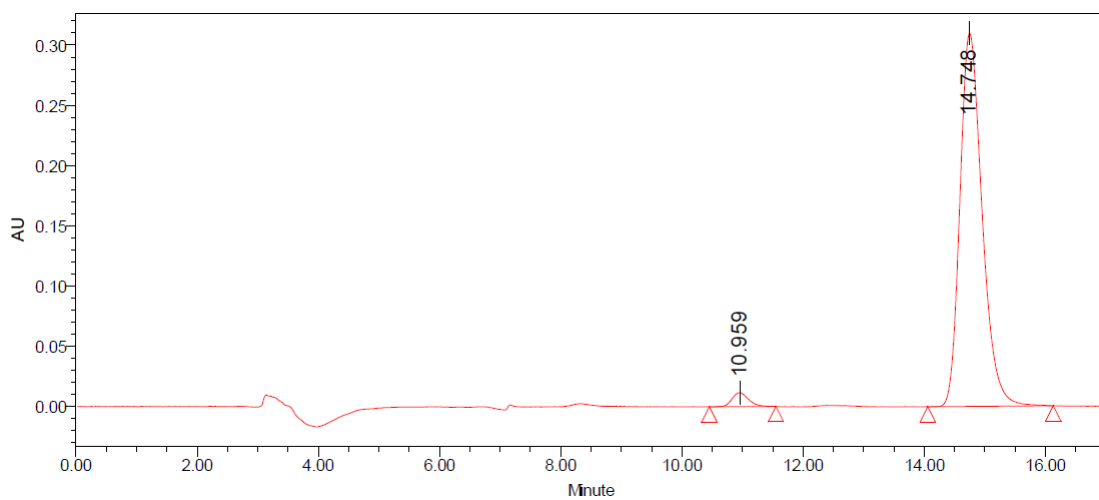

|   | RT (Min) | Area (μU*s) | % Area | Height (μU) | % Height | Start Time (Min) | End Time (Min) |
|---|----------|-------------|--------|-------------|----------|------------------|----------------|
| 1 | 10.959   | 215441      | 2.66   | 11614       | 3.61     | 10.452           | 11.552         |
| 2 | 14.748   | 7884745     | 97.34  | 309863      | 96.39    | 14.058           | 16.128         |
